# Supplementary material for: A metal-catalyzed new approach for α-alkynylation of cyclic amines
Source: PubMed Central journal article supplement (PMC6369436; doi:10.1039/c8sc04115f), 2018-11-26

lwl-7-51H-400M  
Mar 31 2016  
SOLVENT: CDCl3  
NA = 8  
F1 = 399.722809 MHz  
F2 = 100.519203 MHz

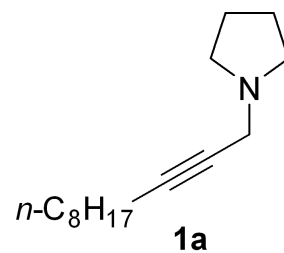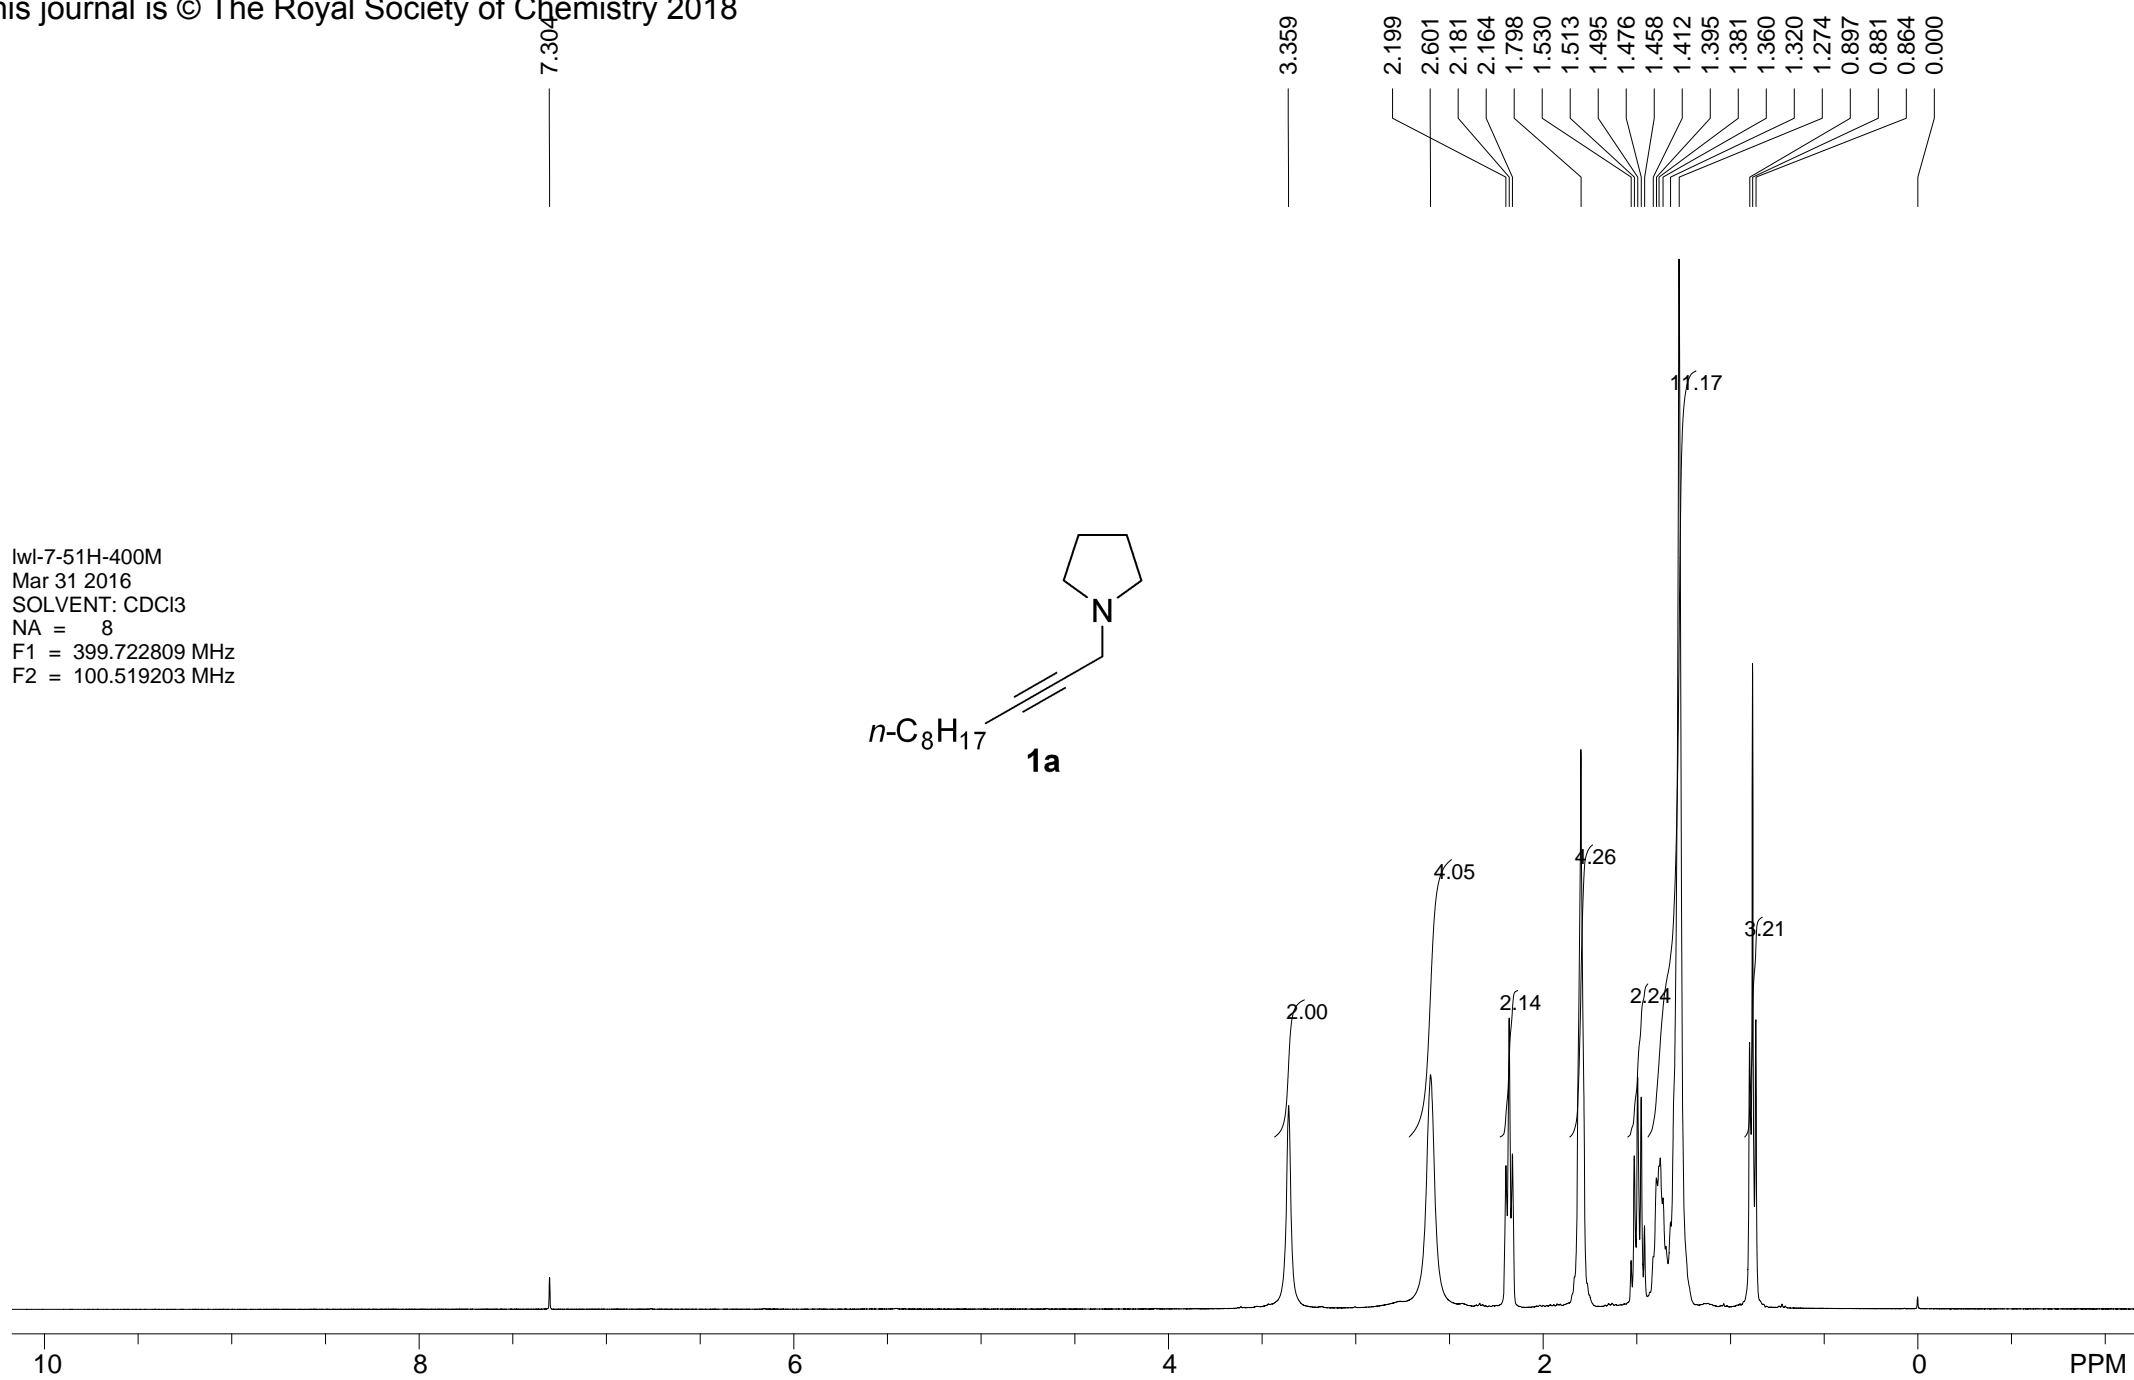

lwl-7-51C-400M  
Mar 31 2016  
SOLVENT: CDCl3  
NA = 40  
F1 = 100.520737 MHz  
F2 = 399.722015 MHz

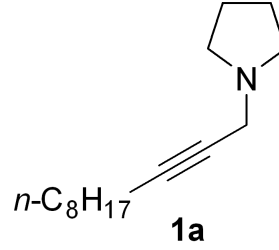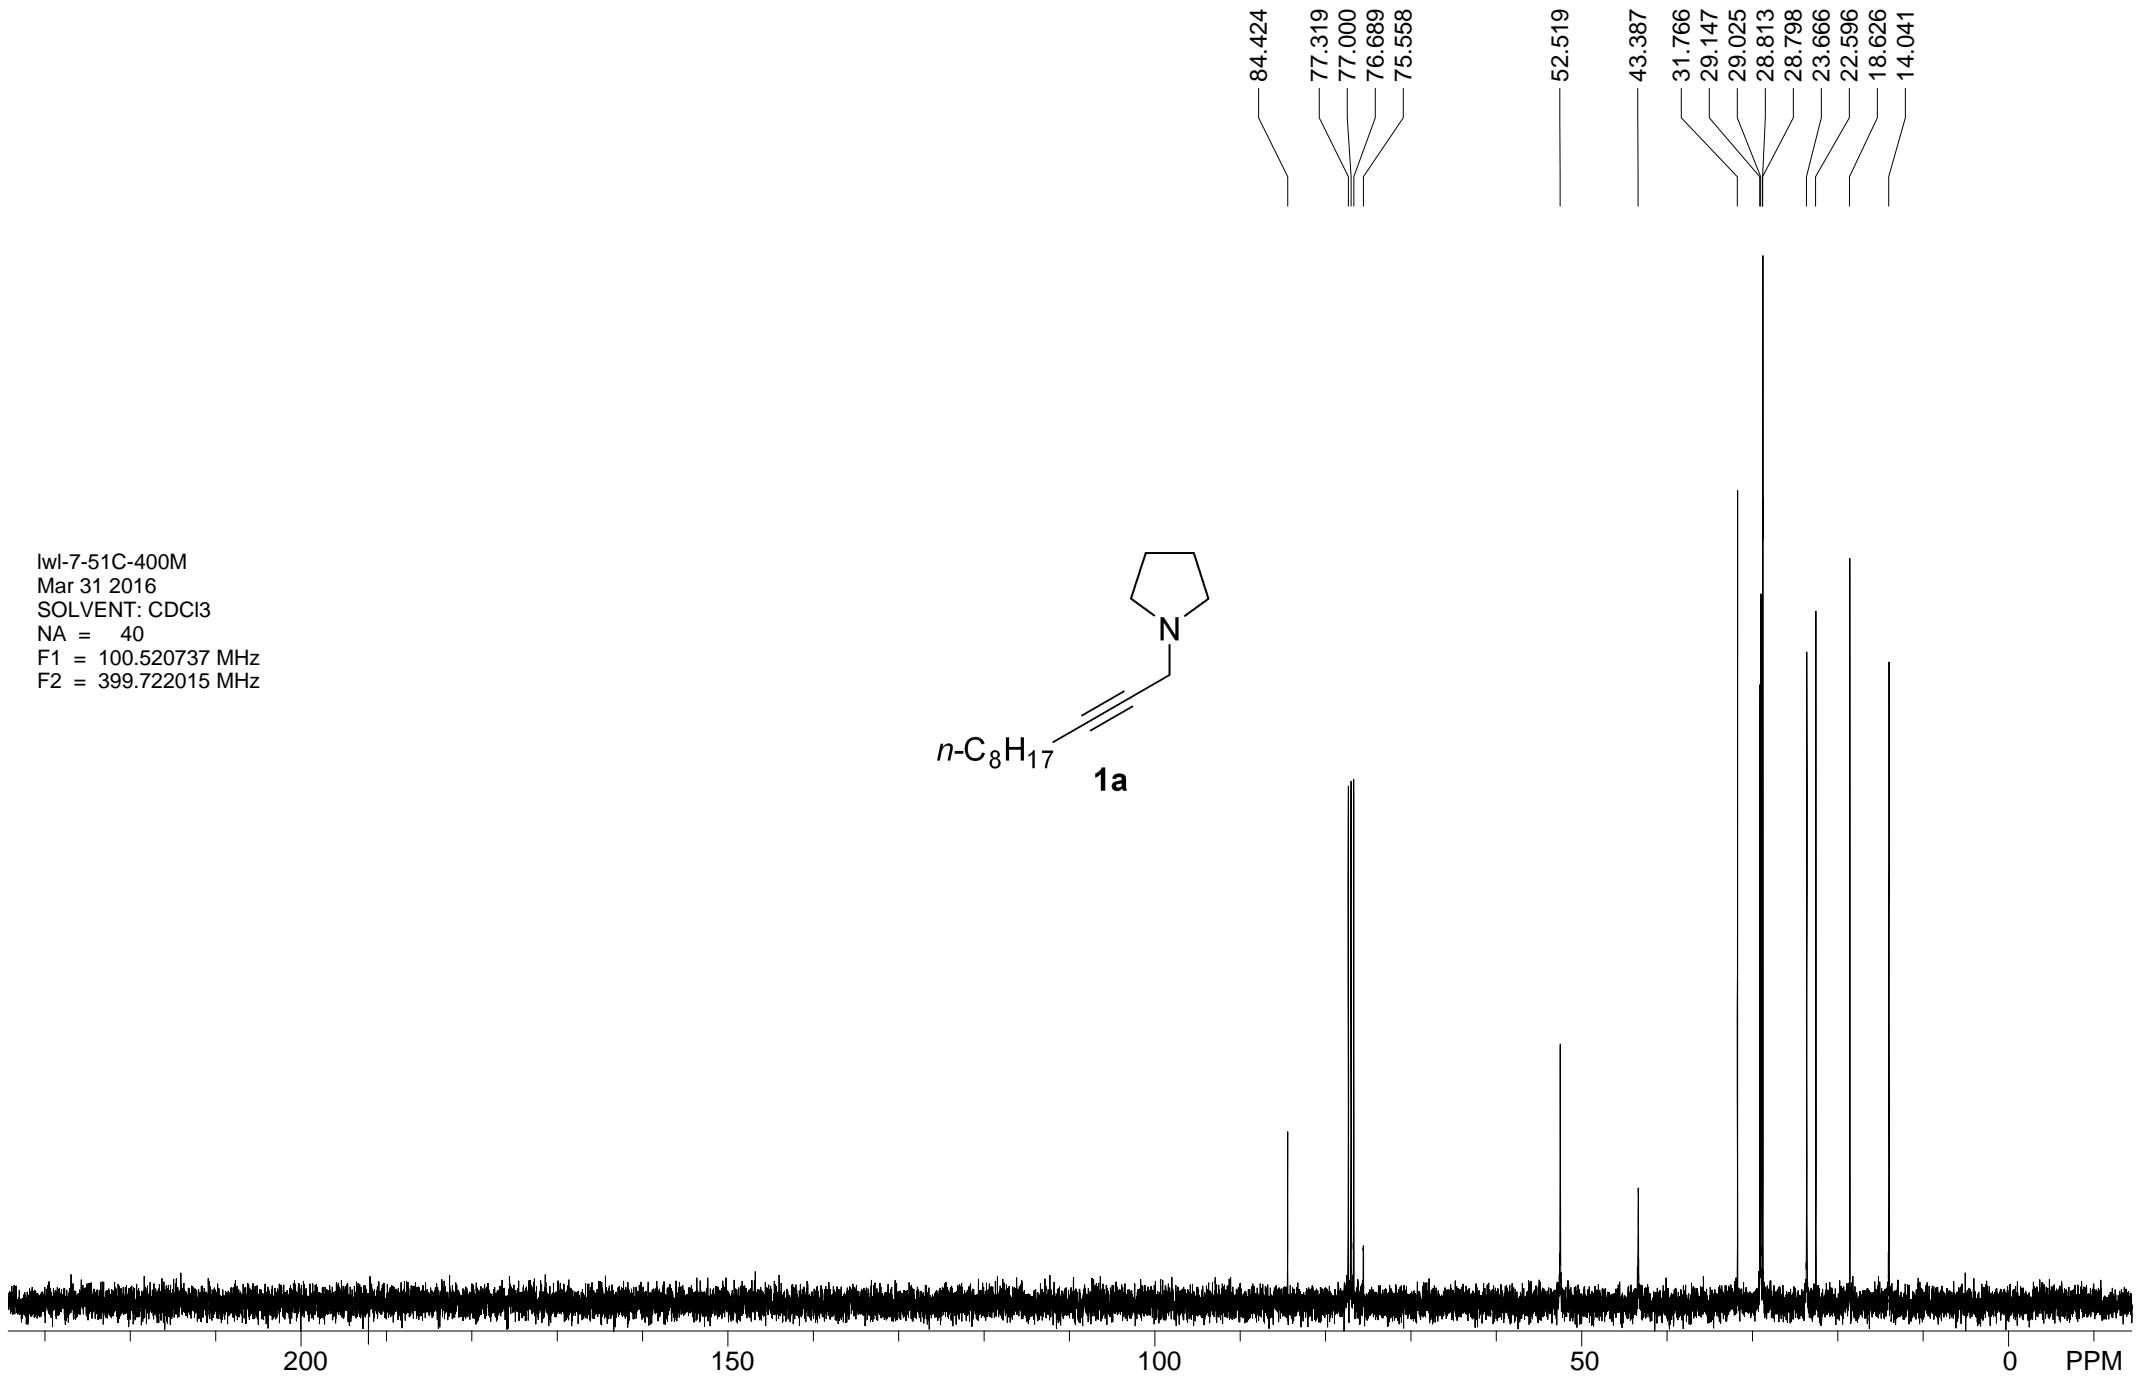

lwl-8-38H-400M  
Mar 31 2016  
SOLVENT: CDCl3  
NA = 8  
F1 = 399.722809 MHz  
F2 = 100.519203 MHz

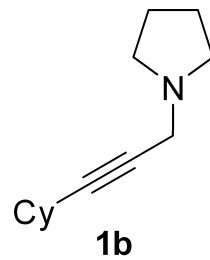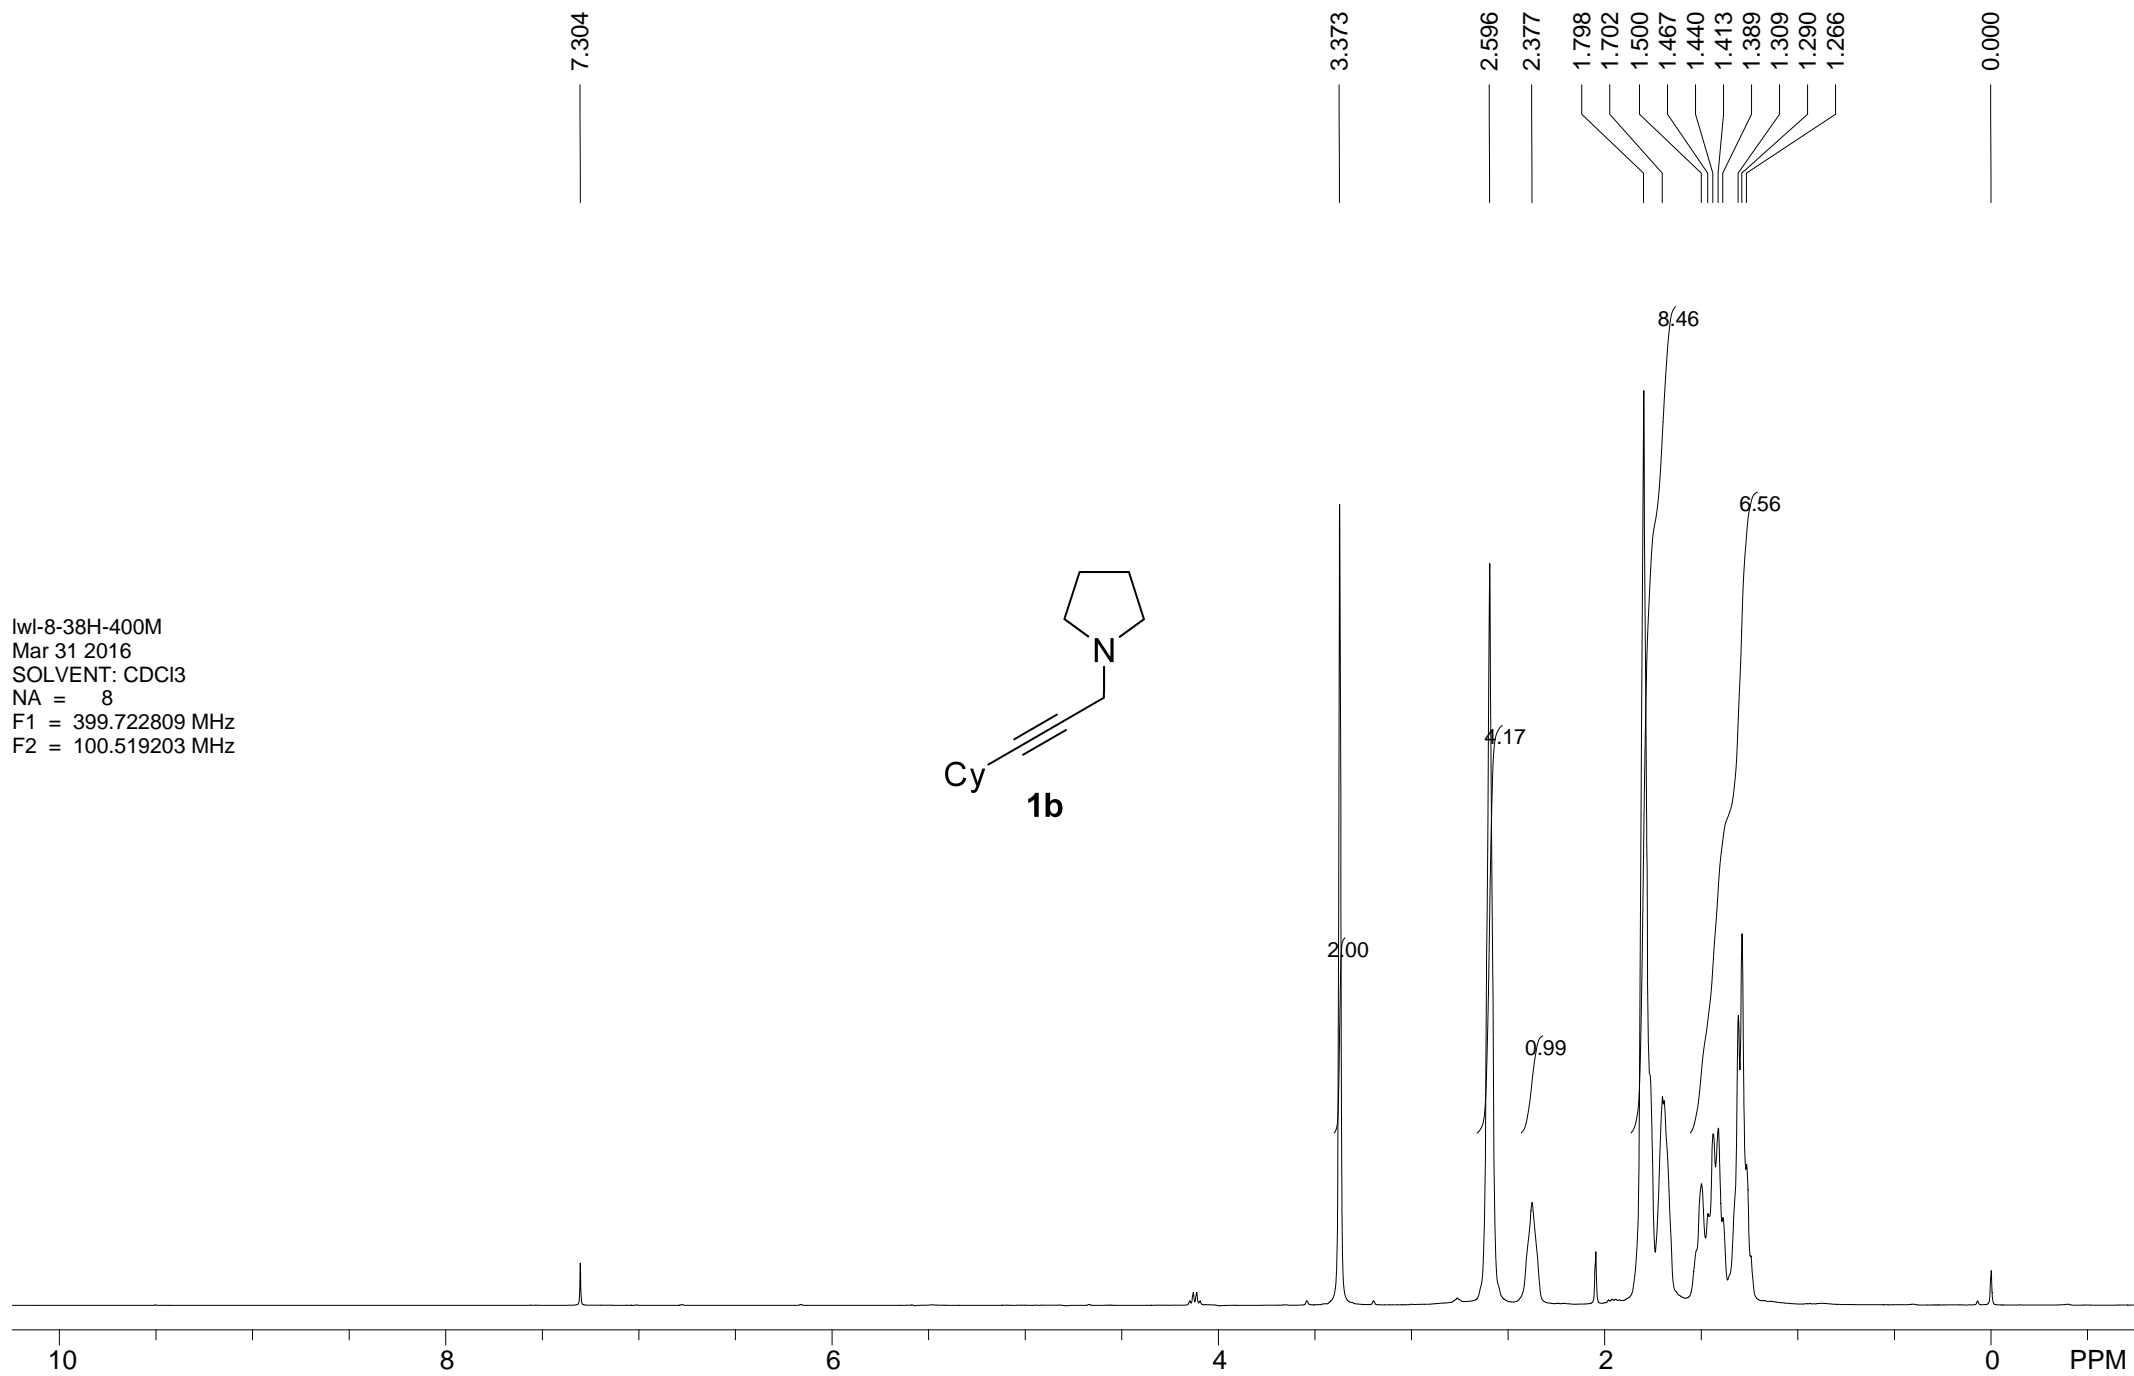

lwl-8-38C-400M  
Mar 31 2016  
SOLVENT: CDCl3  
NA = 32  
F1 = 100.520737 MHz  
F2 = 399.722015 MHz

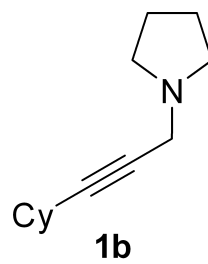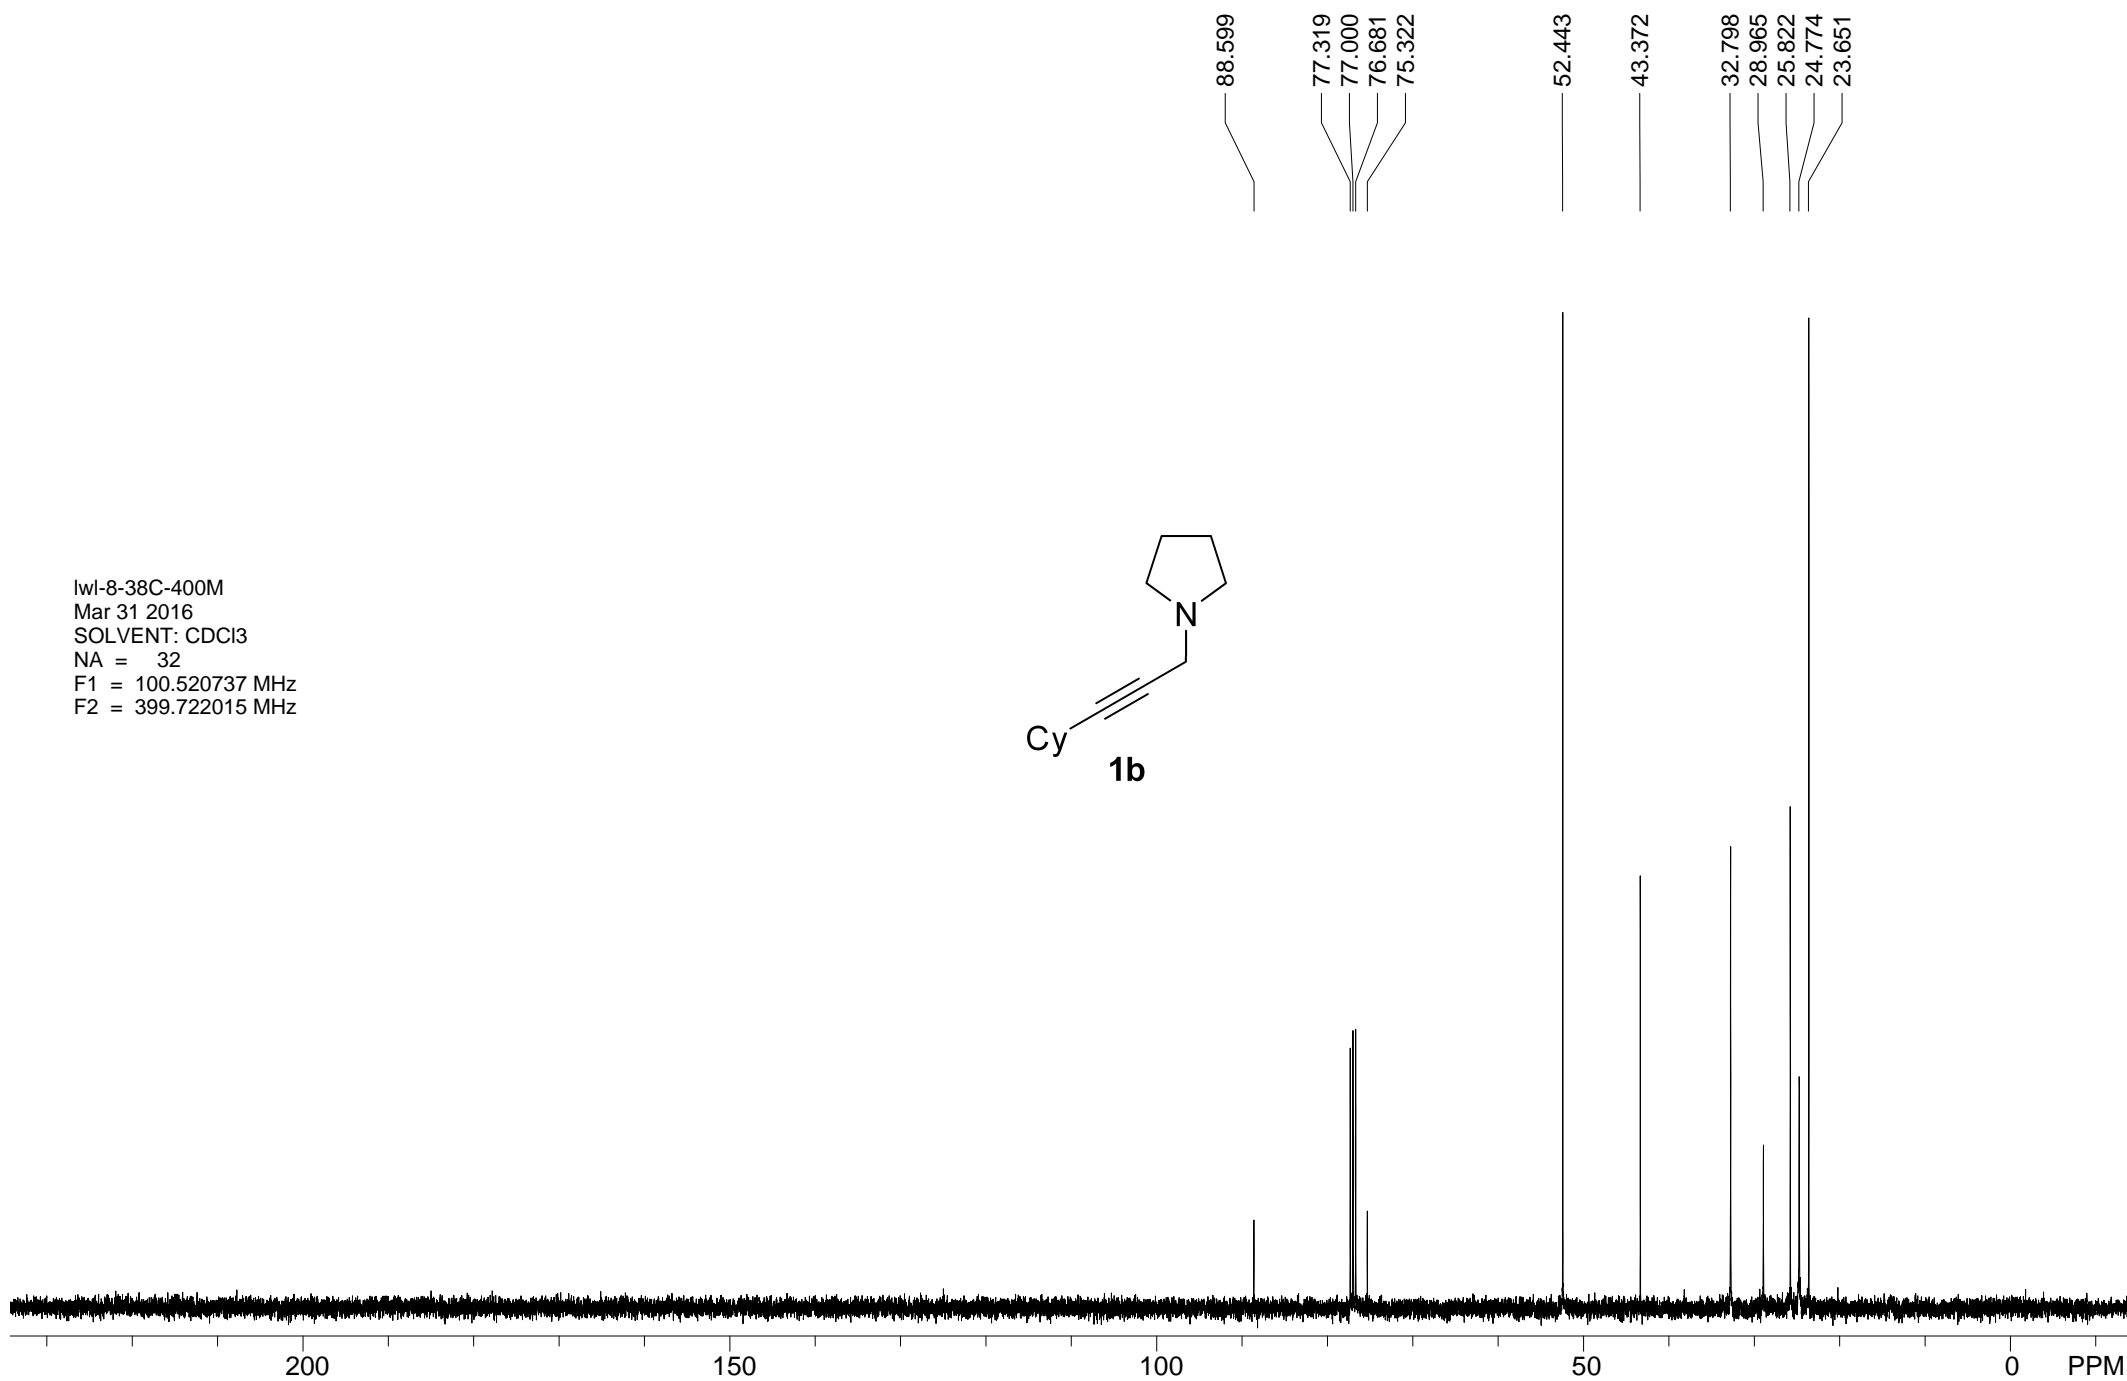

cyf-1-103-H400M  
Nov 23 2017  
SOLVENT: CDCl3  
NA = 4  
F1 = 400.031219 MHz  
F2 = 100.596855 MHz

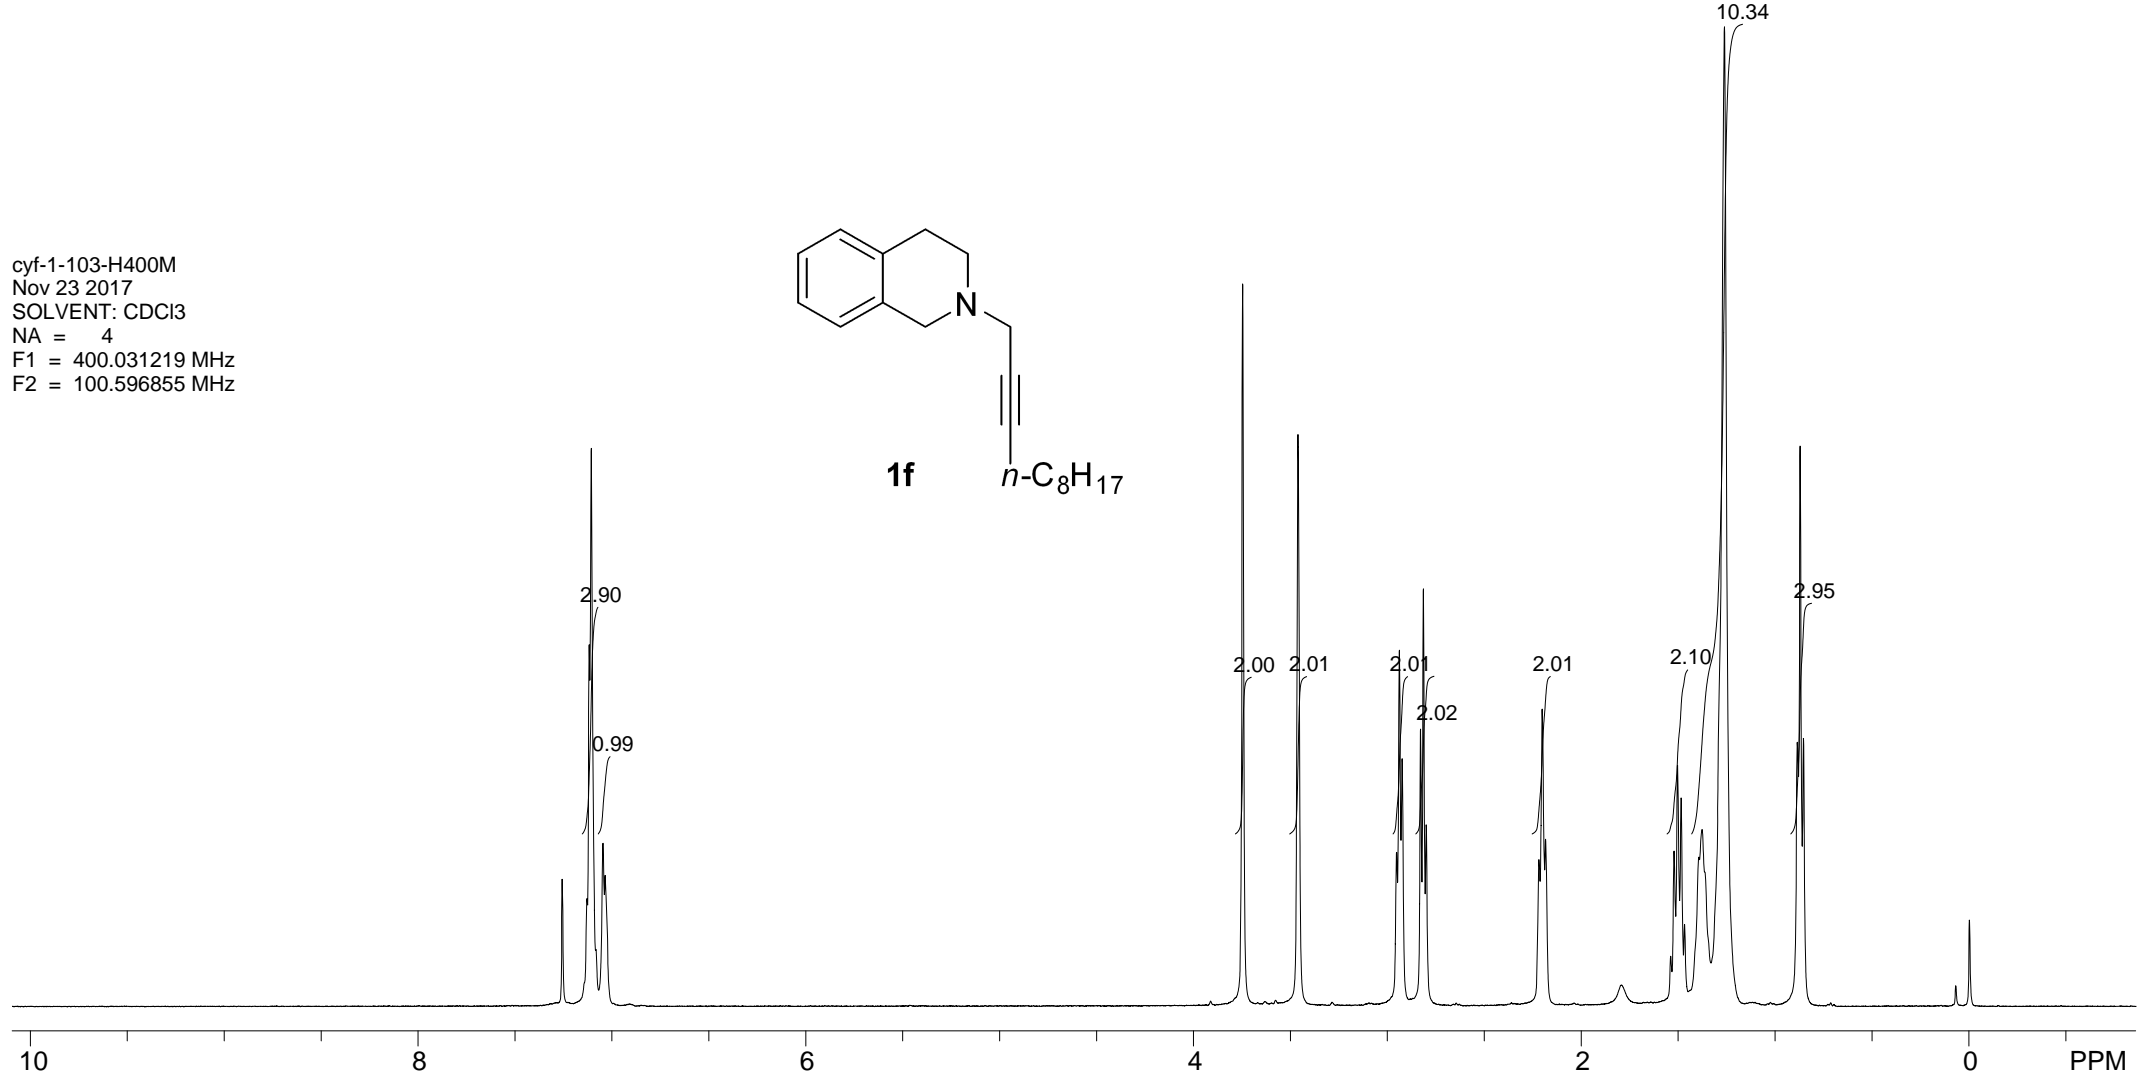

cyf-1-103-C100M  
Nov 24 2017  
SOLVENT: CDCl3  
NA = 320  
F1 = 100.598389 MHz  
F2 = 400.030792 MHz

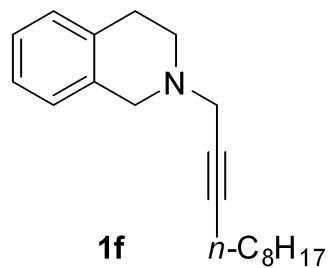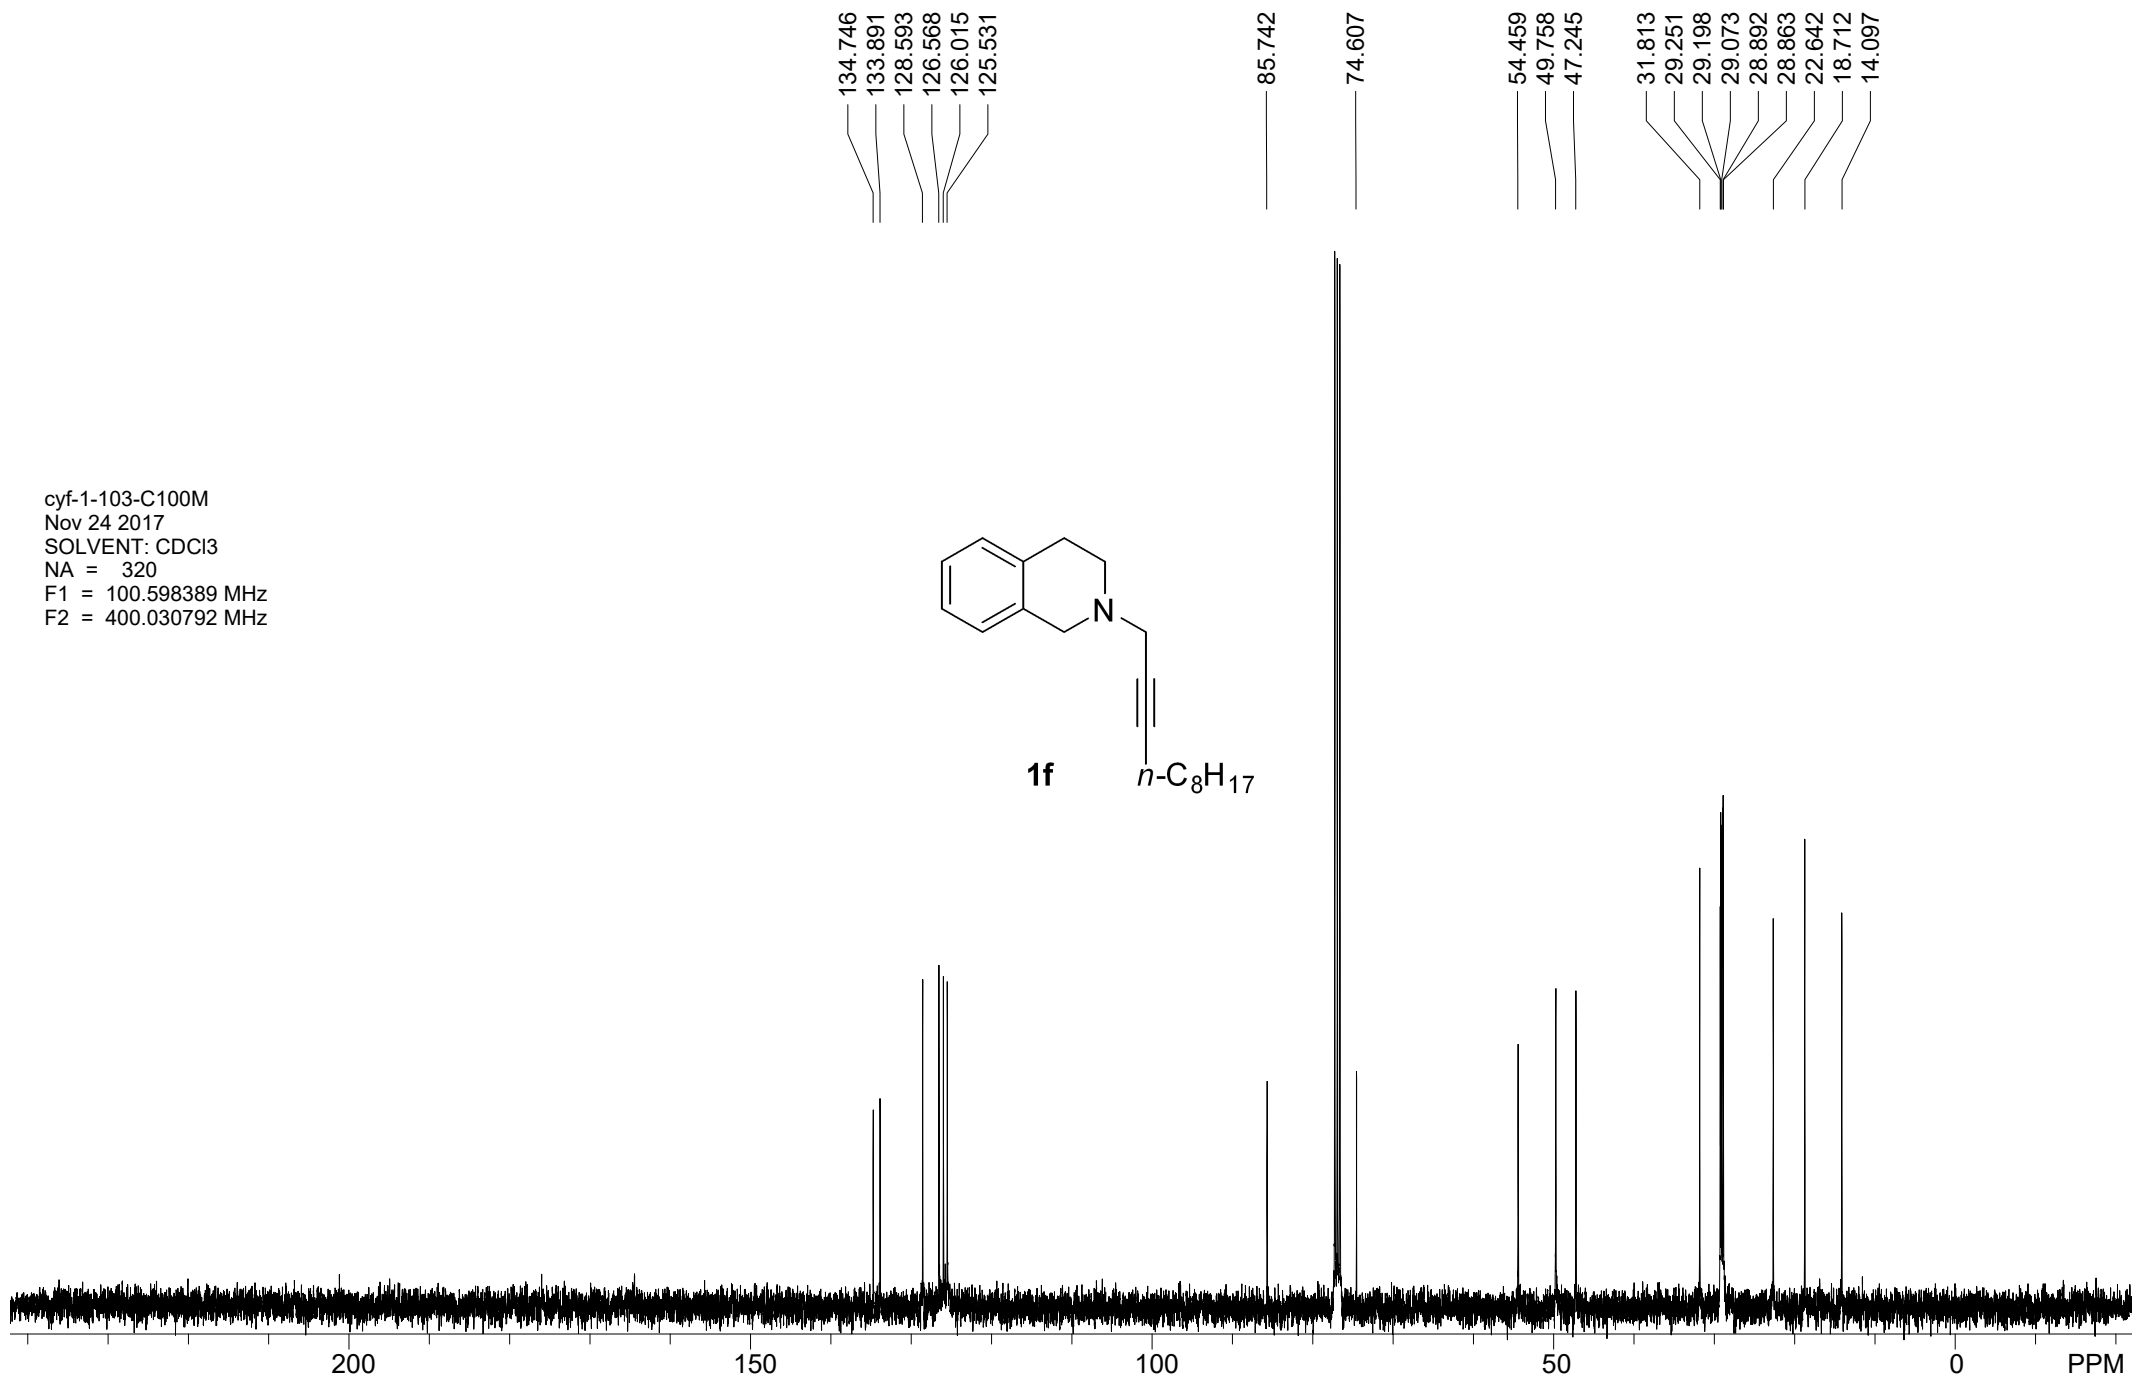

cyf-2-94-h  
Oct 12 2018  
SOLVENT: CDCl3  
NA = 8  
F1 = 399.722626 MHz  
F2 = 100.519203 MHz

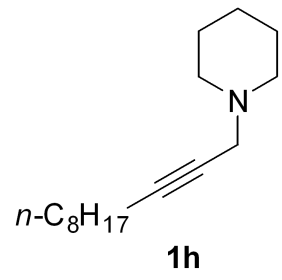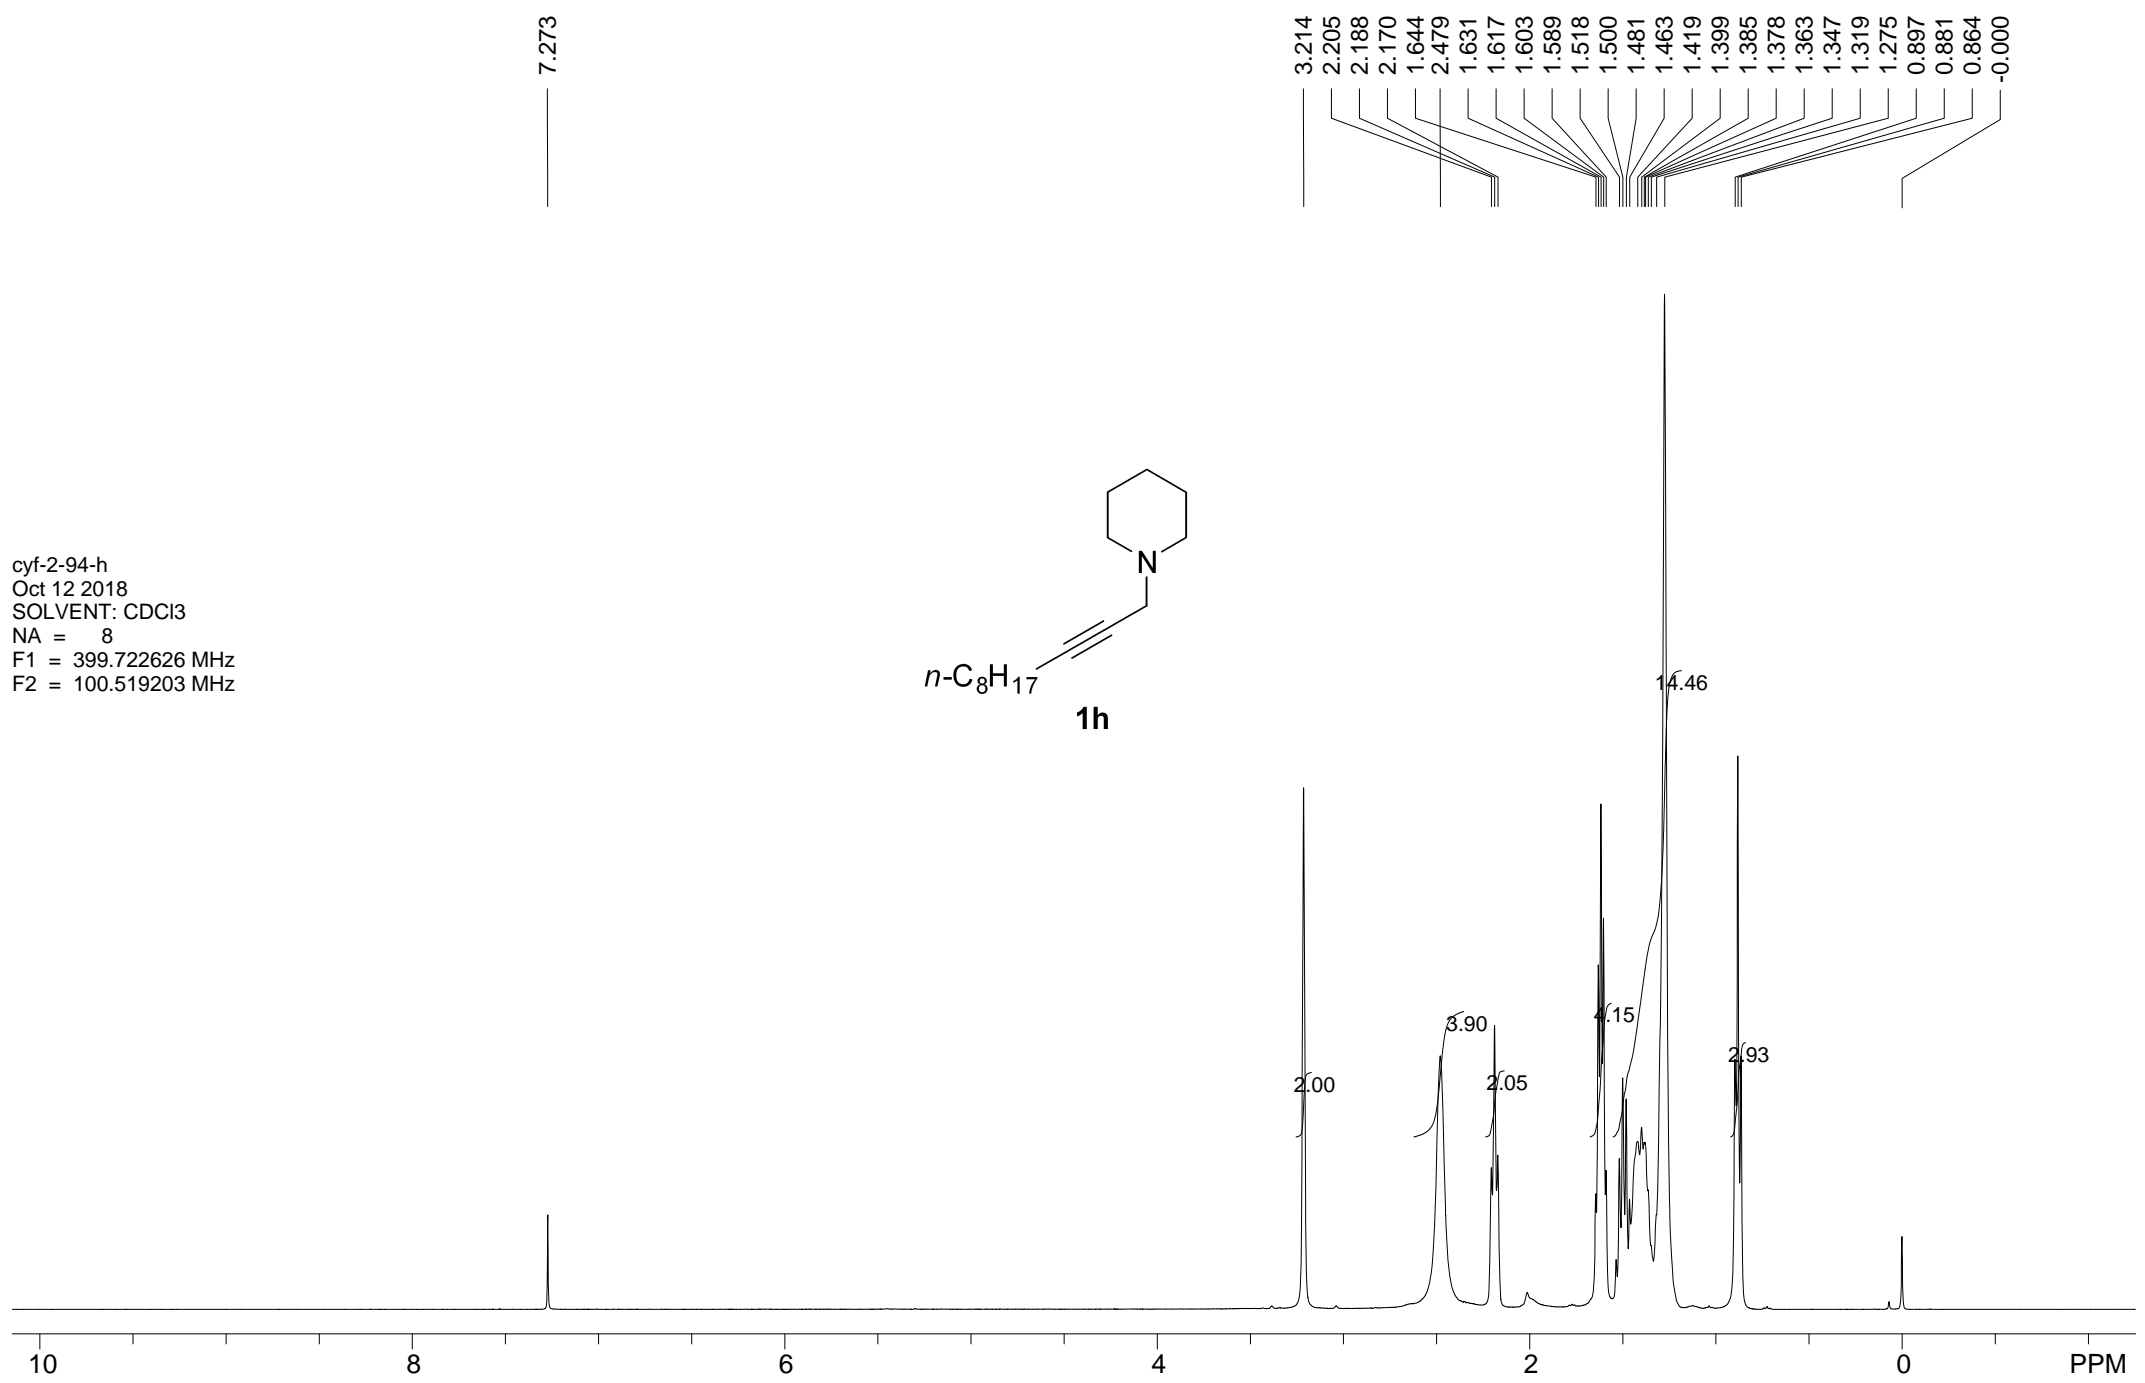

cyf-2-94-c-bruker  
Nov 10 2018  
SOLVENT: CDCl3  
NA = 63  
F1 = 100.630371 MHz  
F2 = 1.000000 MHz

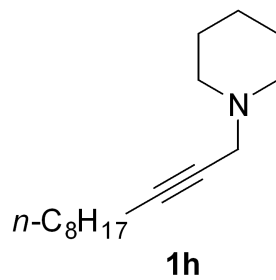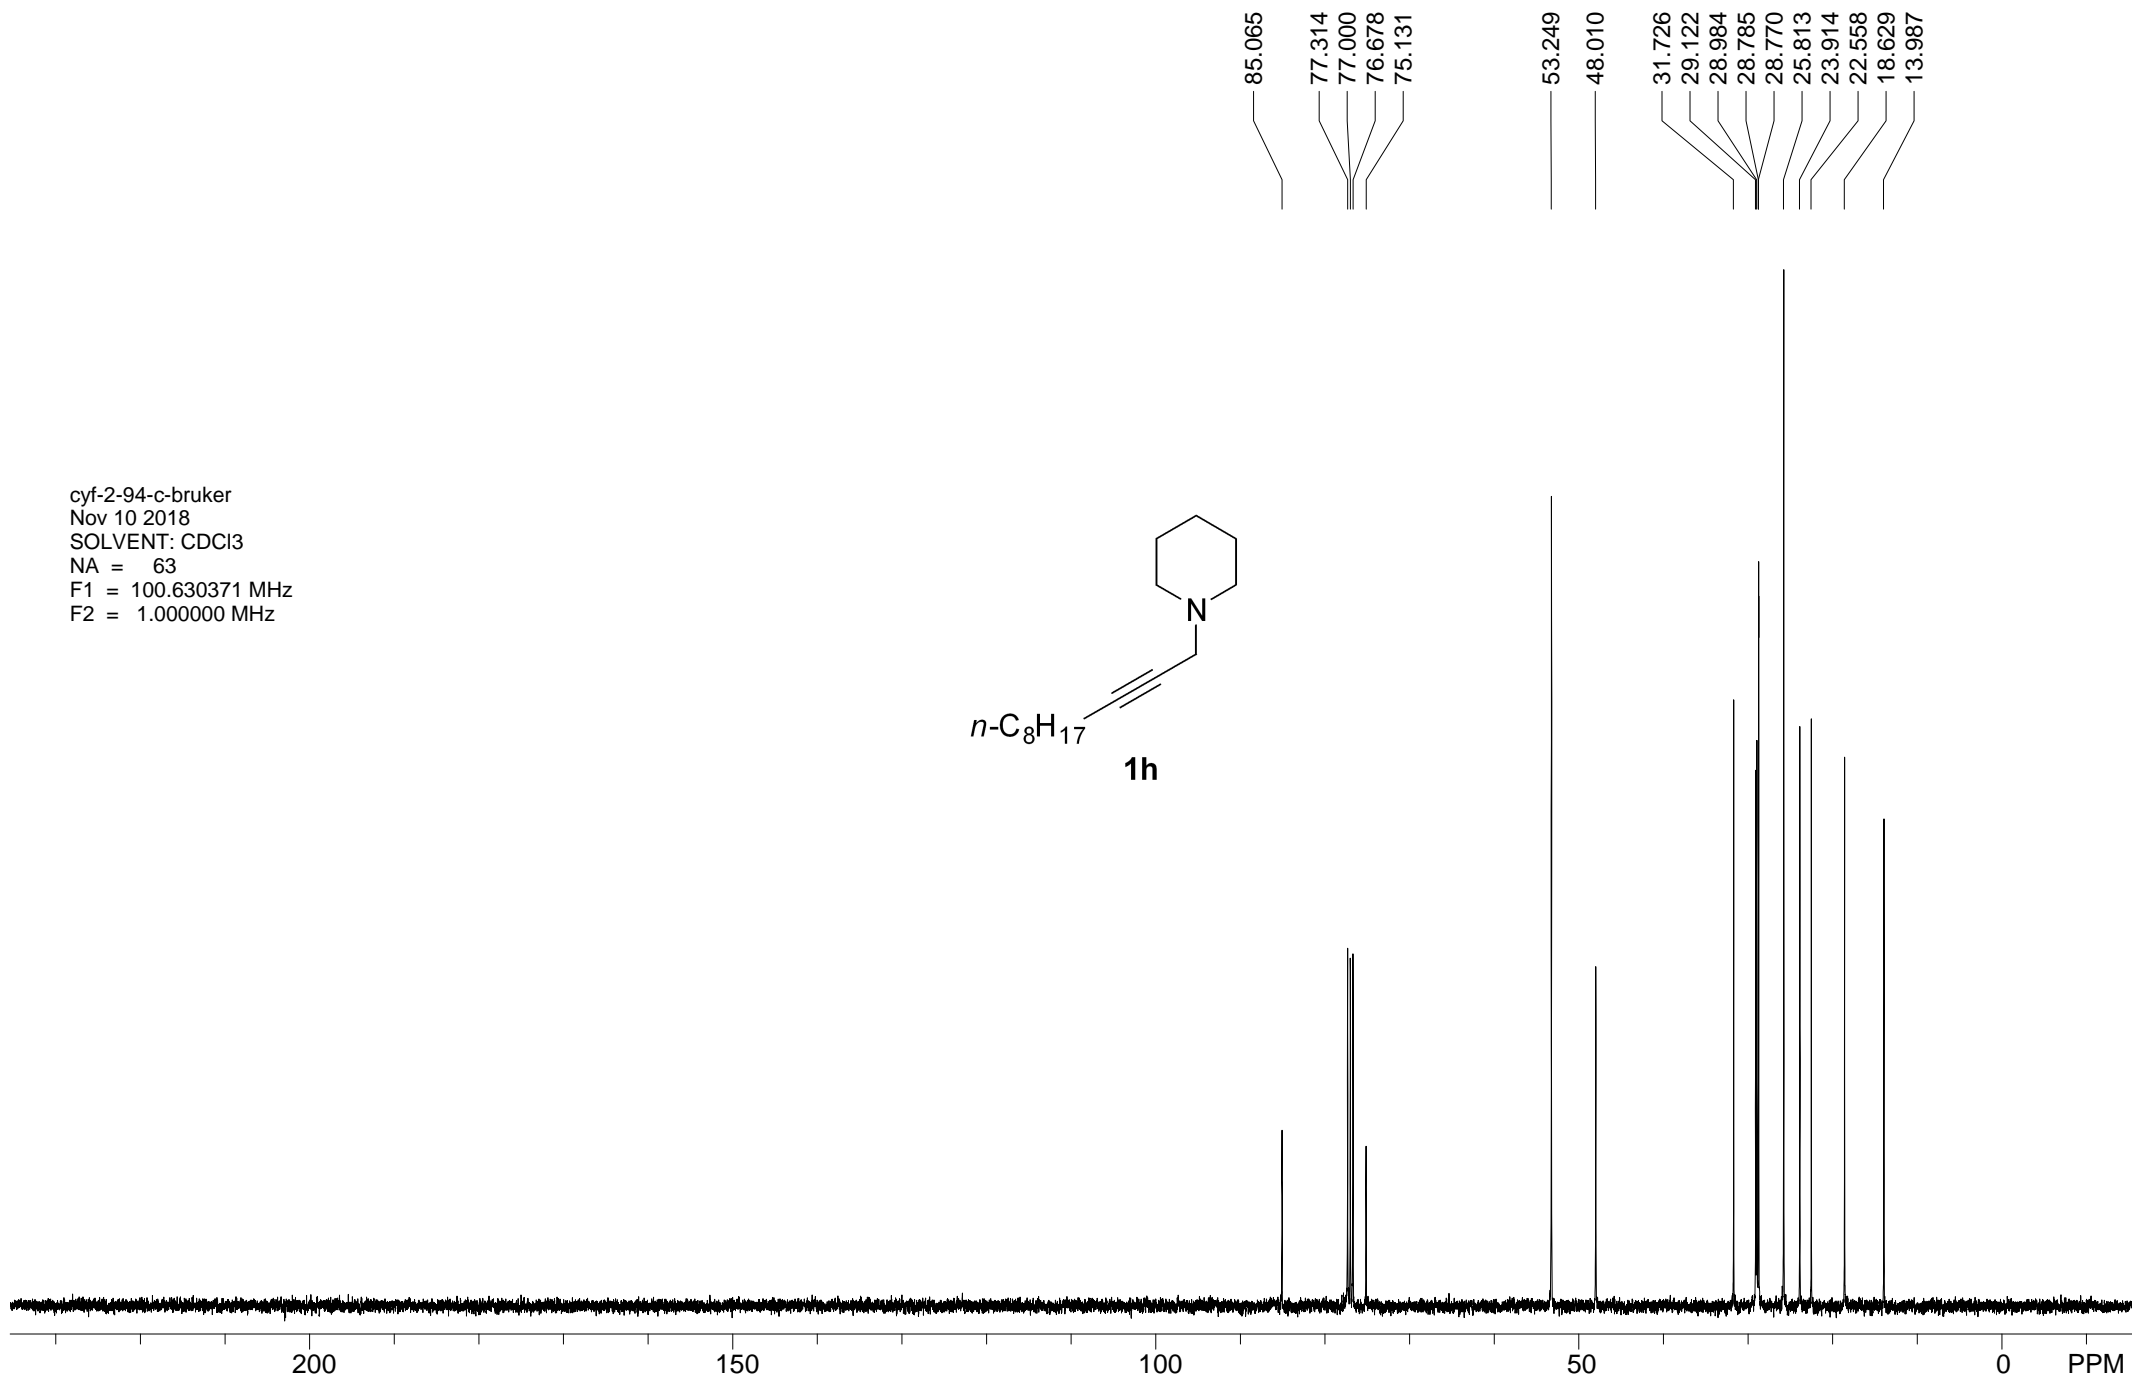



cyf-2-88-h  
Oct 4 2018  
SOLVENT: CDCl3  
NA = 8  
F1 = 399.722809 MHz  
F2 = 100.519203 MHz

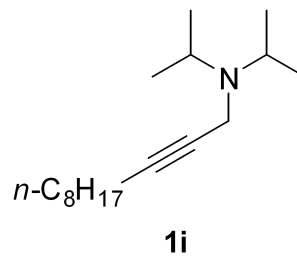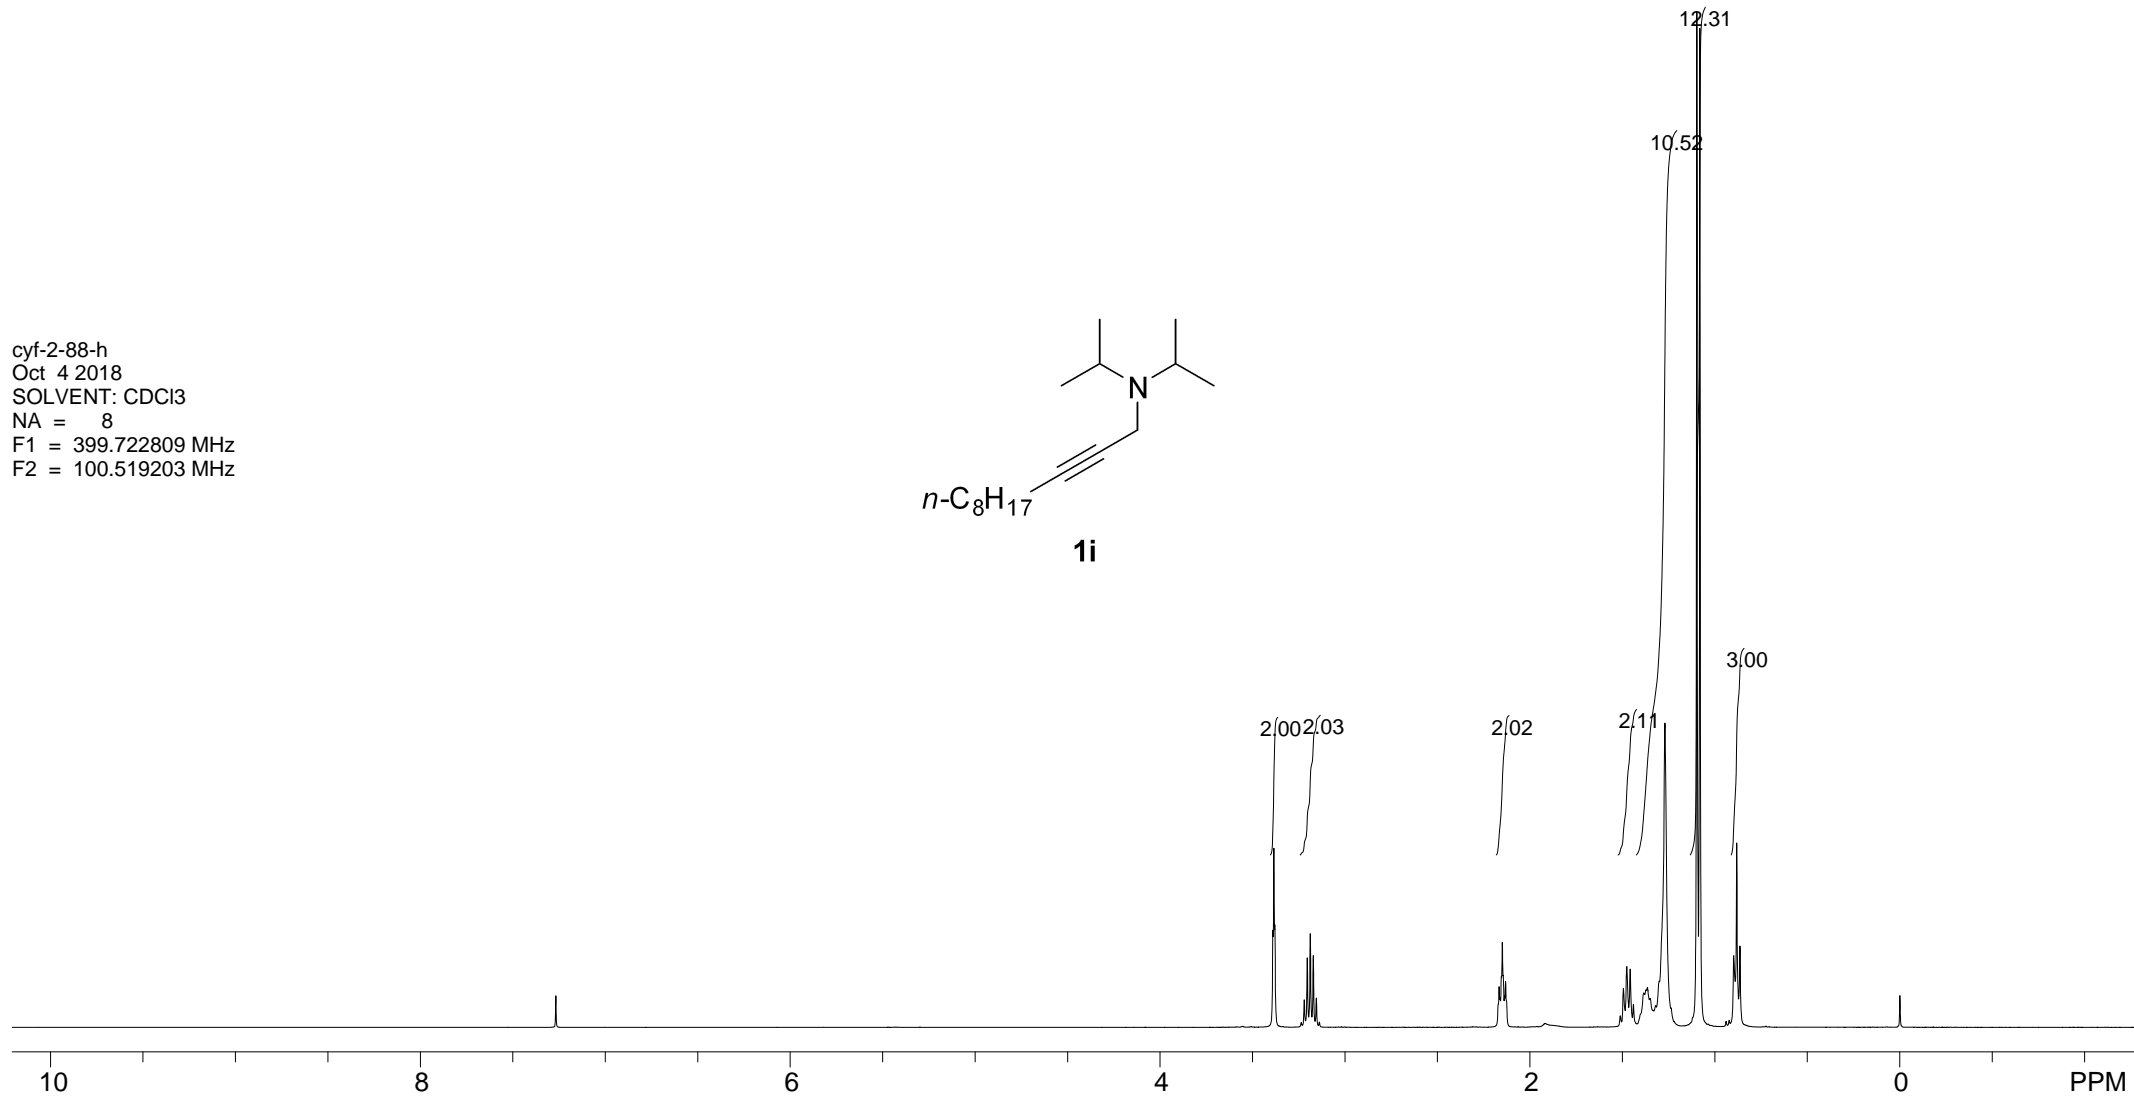

cyf-2-88-c-agilent  
Nov 14 2018  
SOLVENT: CDCl3  
NA = 148  
F1 = 100.520737 MHz  
F2 = 399.722015 MHz

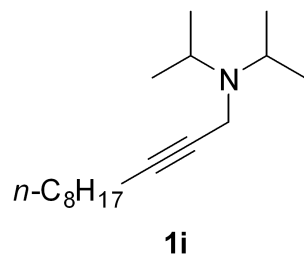

83.460  
78.716  
77.319  
77.000  
76.681

48.200  
48.177

34.278  
31.804  
29.207  
29.071  
28.858  
28.805  
22.641  
20.501  
18.808  
14.079

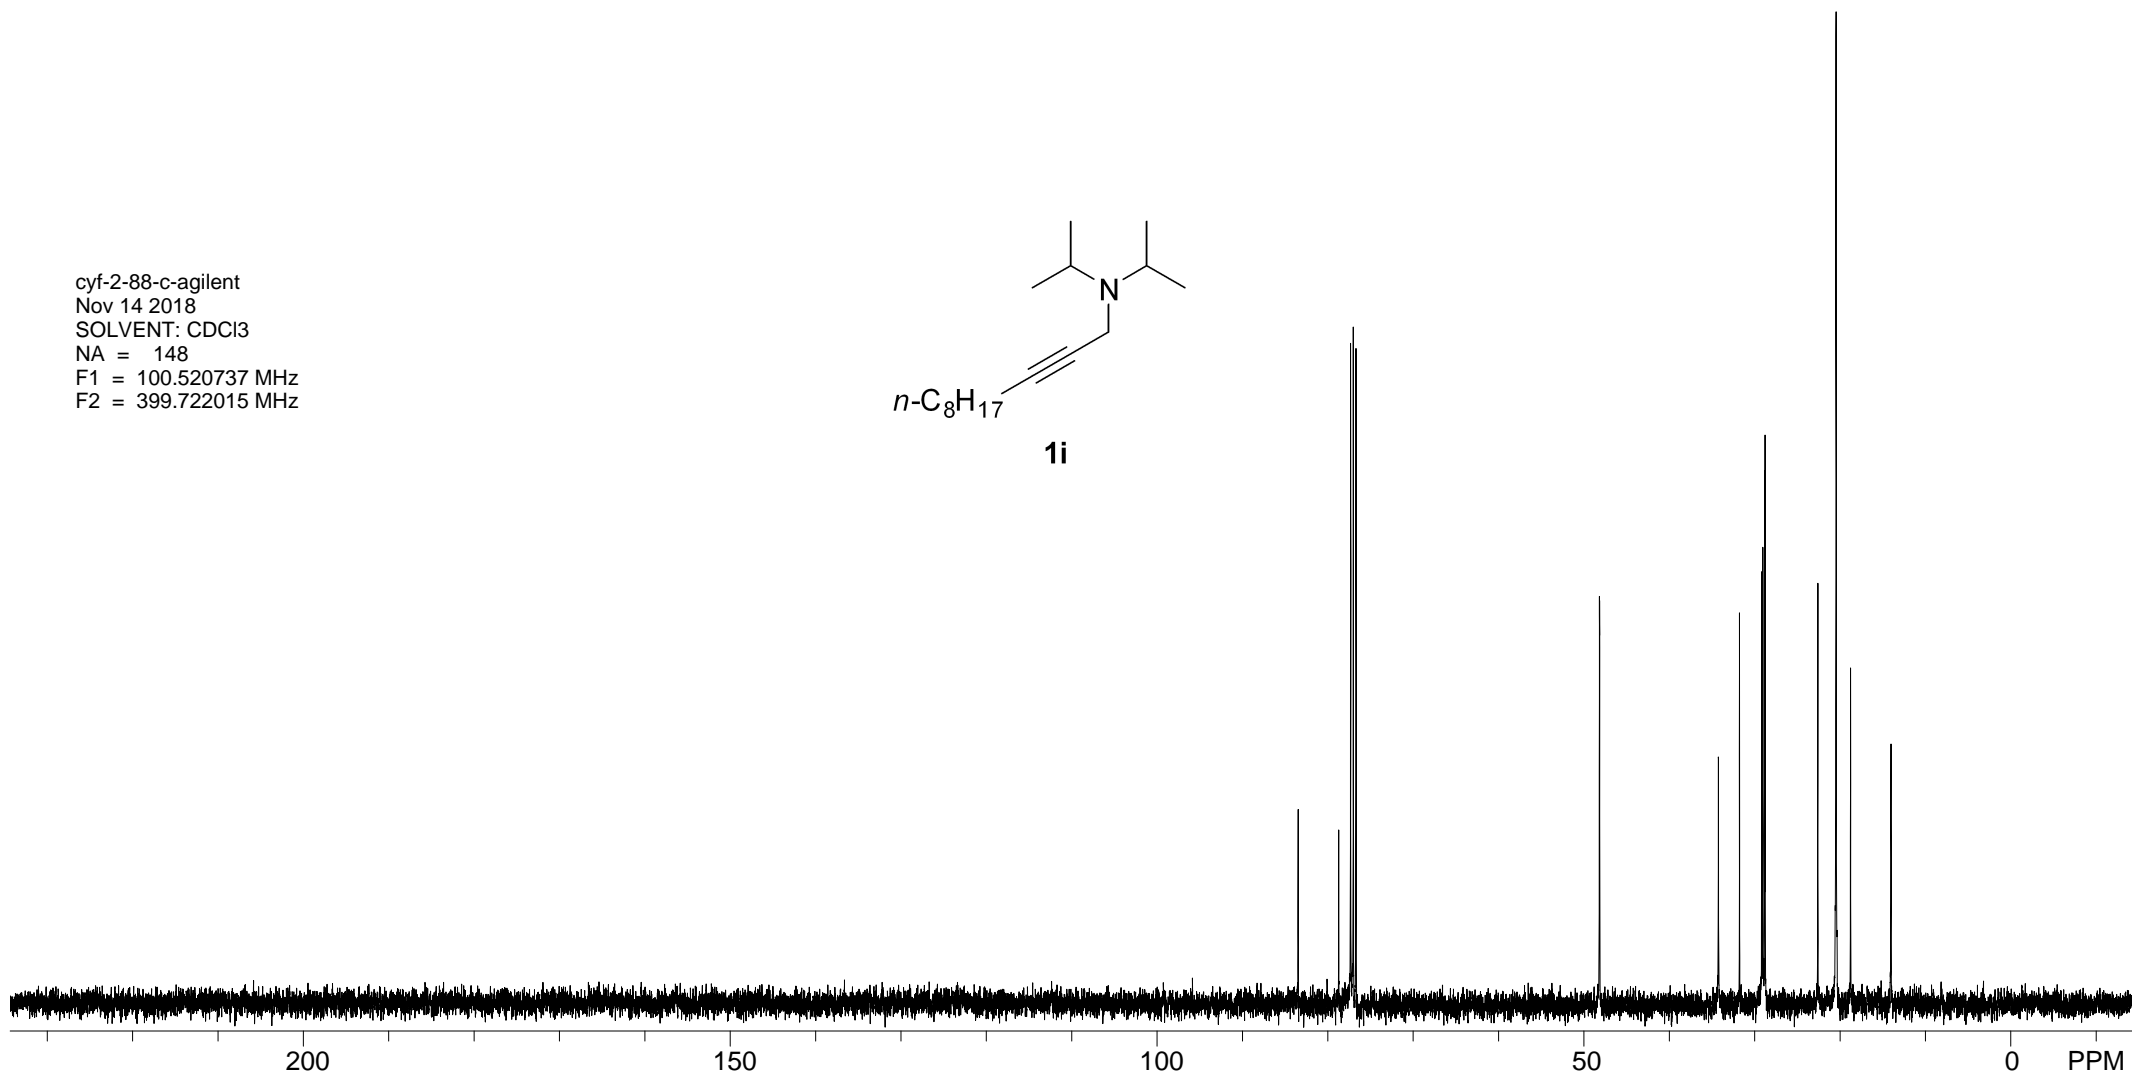

lwl-7-195H-400M  
Dec 28 2015  
SOLVENT: CDCl3  
NA = 8  
F1 = 399.722809 MHz  
F2 = 100.519203 MHz

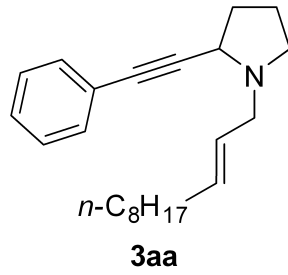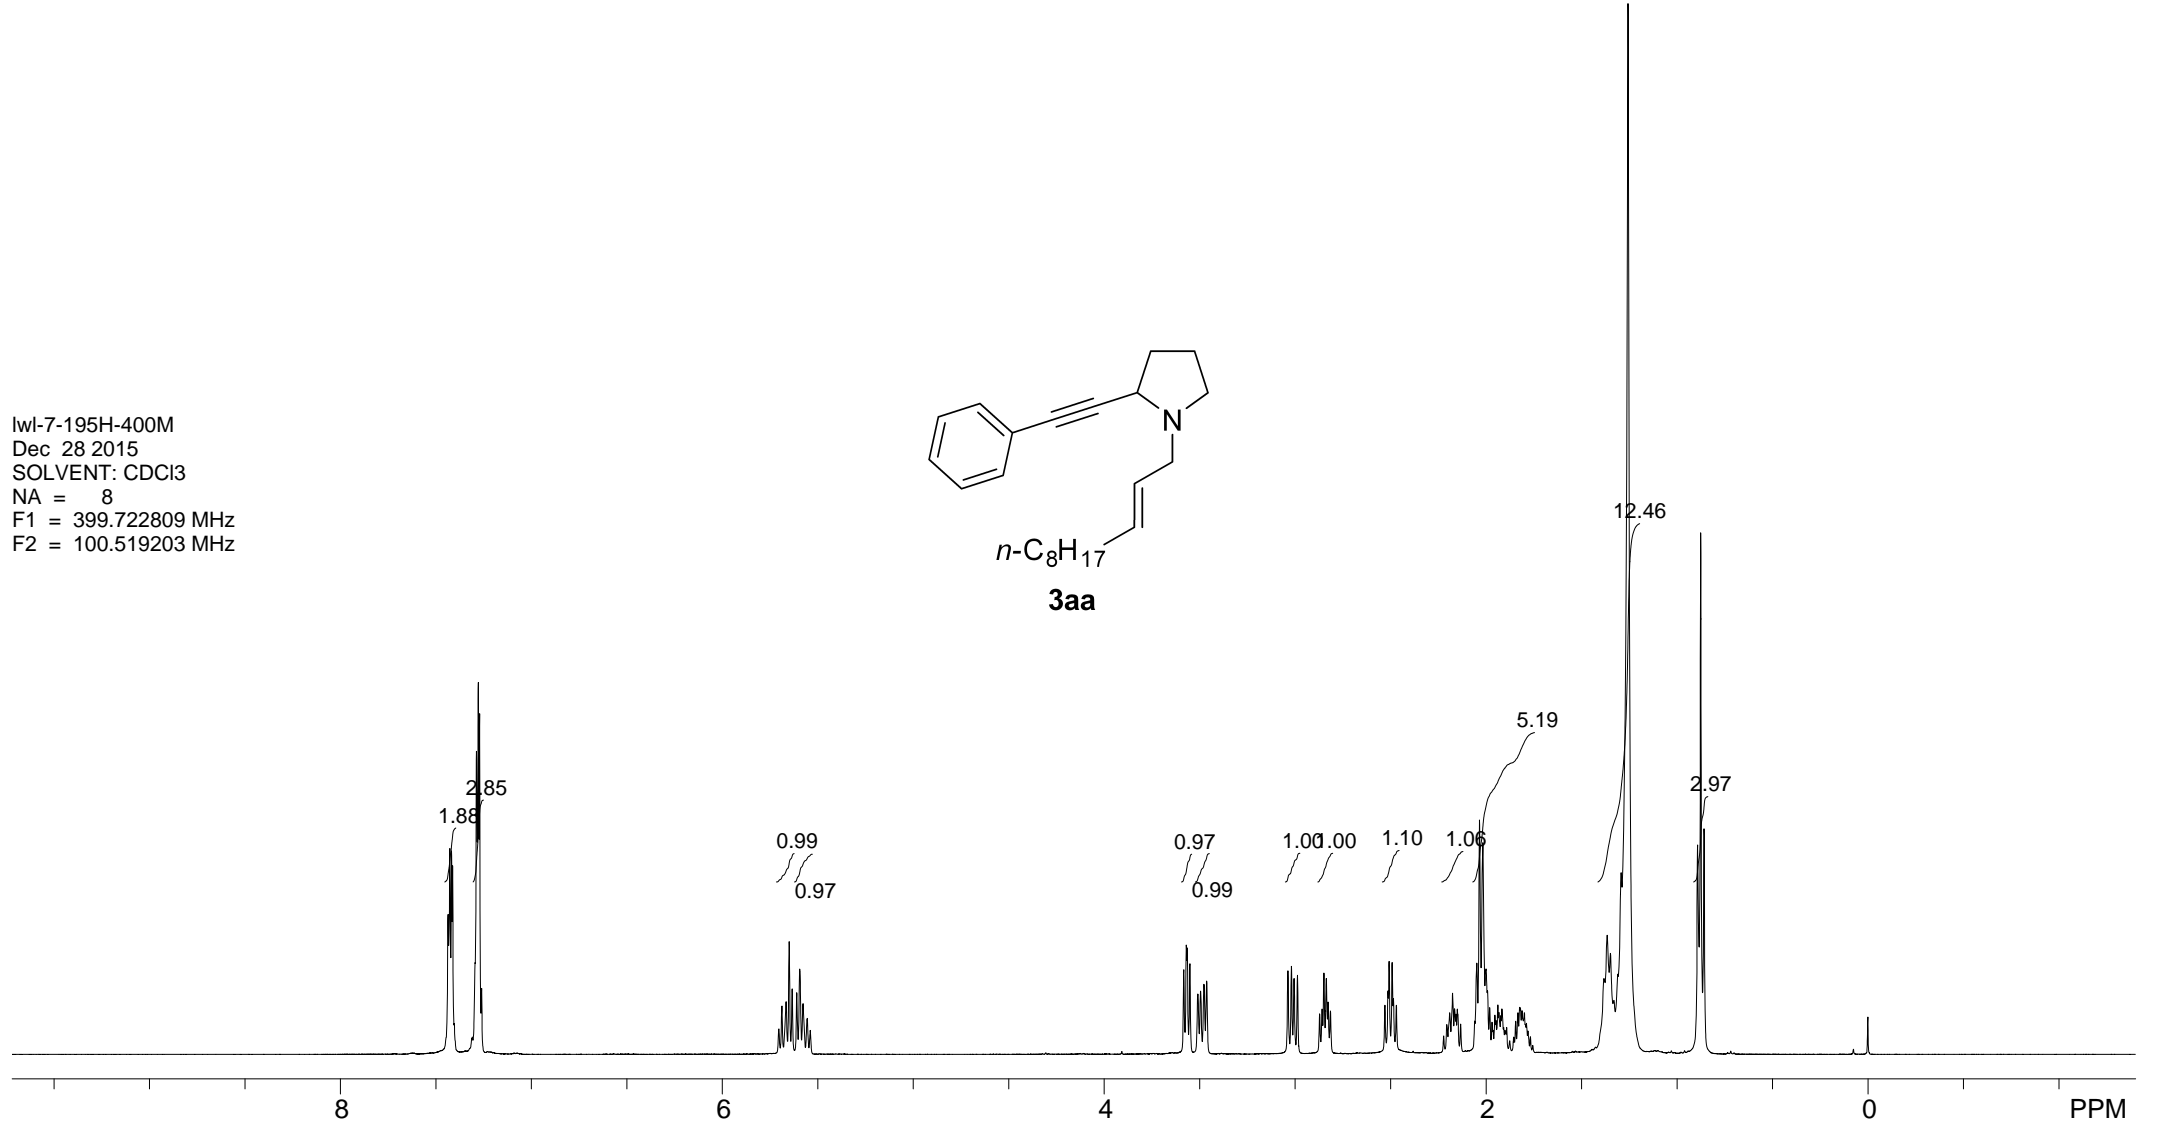

lw17-195C-400M  
Dec 28 2015  
SOLVENT: CDCl3  
NA = 120  
F1 = 100.520737 MHz  
F2 = 399.722015 MHz

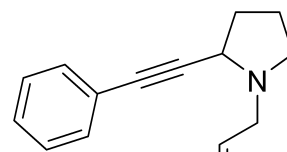

$n\text{-C}_8\text{H}_{17}$

**3aa**

134.091  
131.624  
128.117  
127.806  
126.713  
123.350

88.713  
84.523  
77.319  
77.000  
76.681

55.305  
54.516  
51.570

32.320  
31.834  
31.682  
29.397  
29.238  
29.177  
29.109  
22.626  
21.966  
14.064

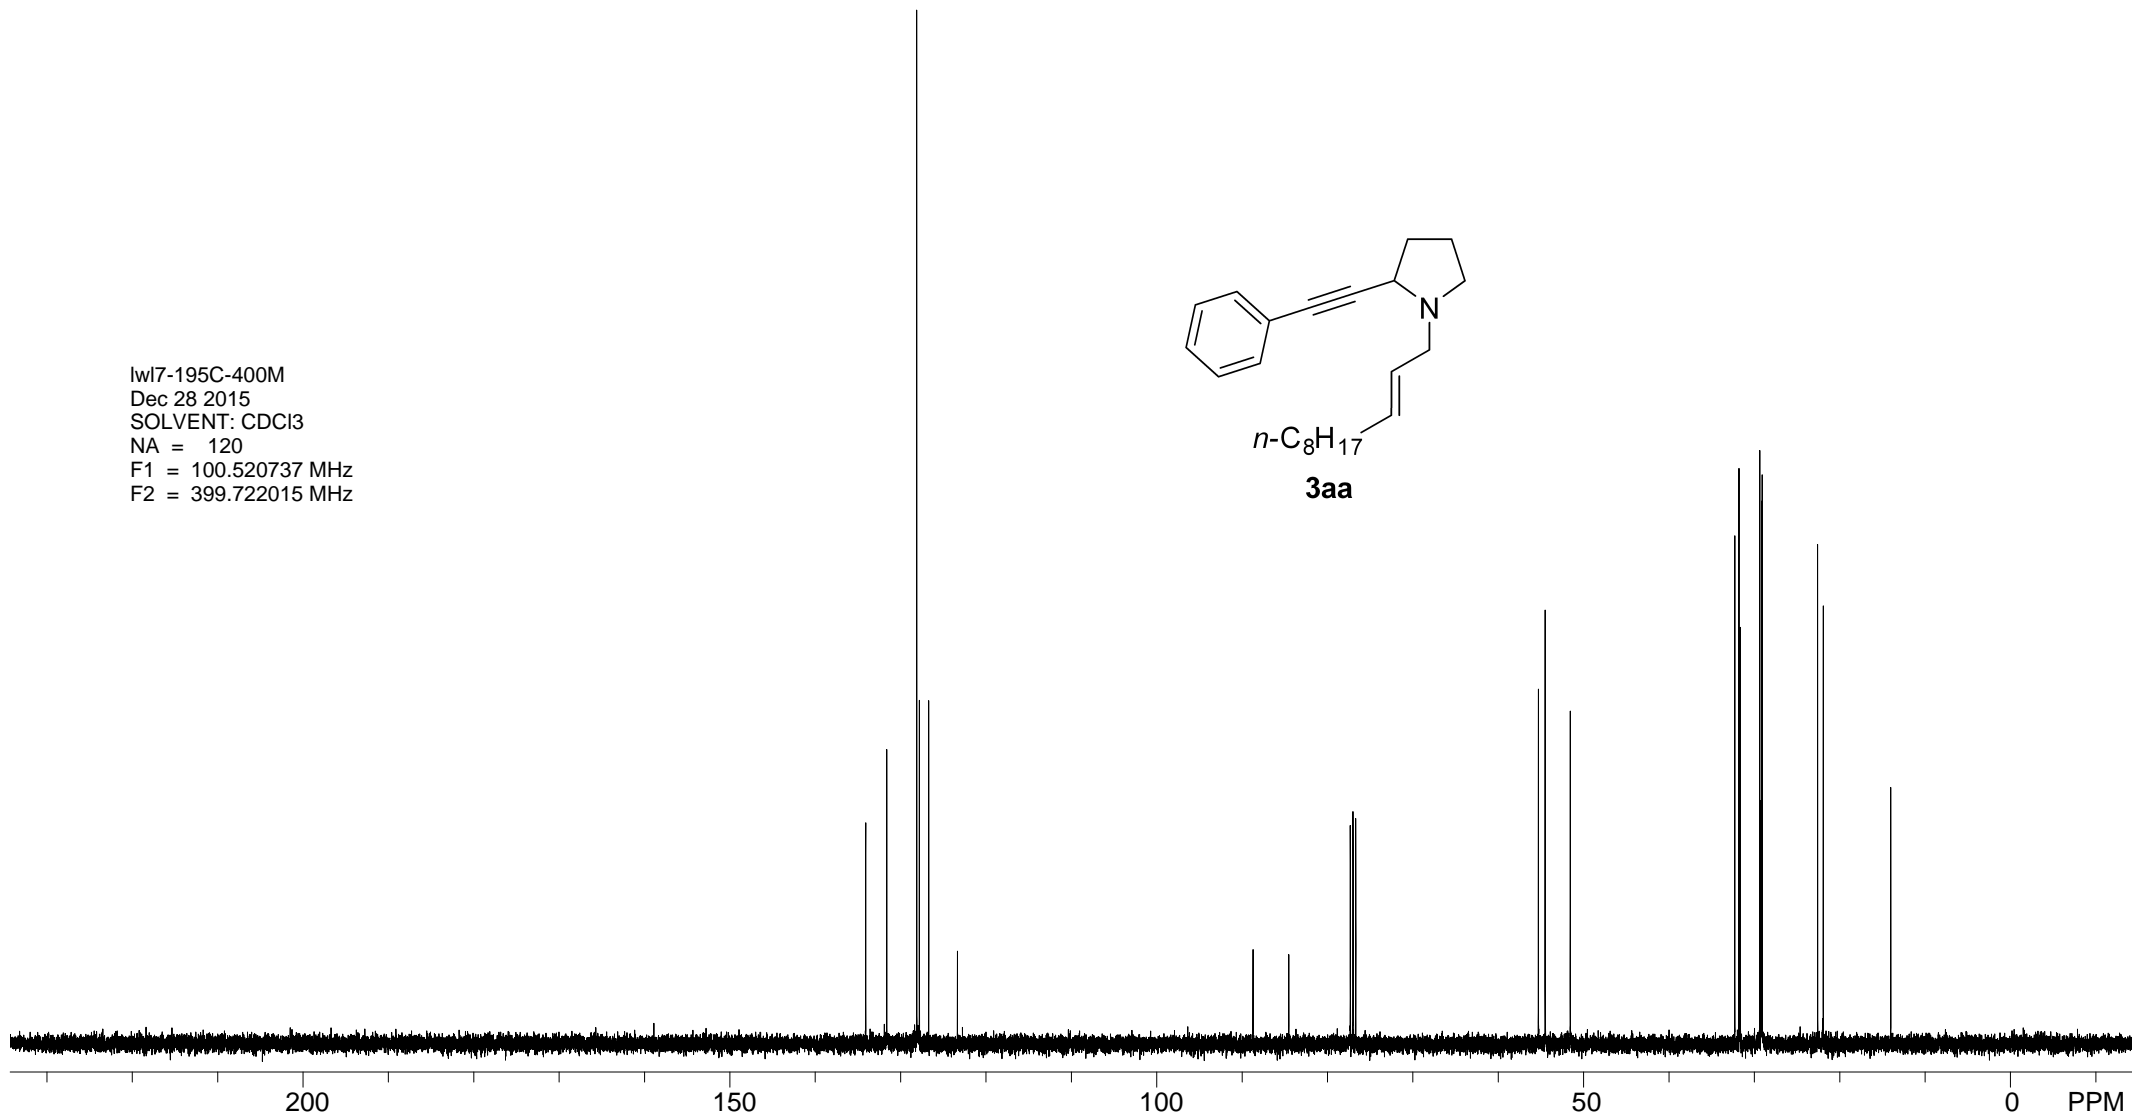

cyf-2-62-h  
Jul 26 2018  
SOLVENT: CDCl3  
NA = 8  
F1 = 399.722626 MHz  
F2 = 100.519203 MHz

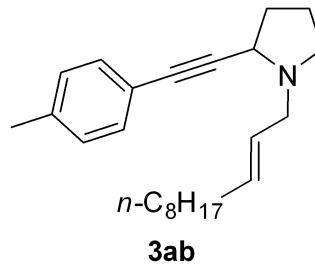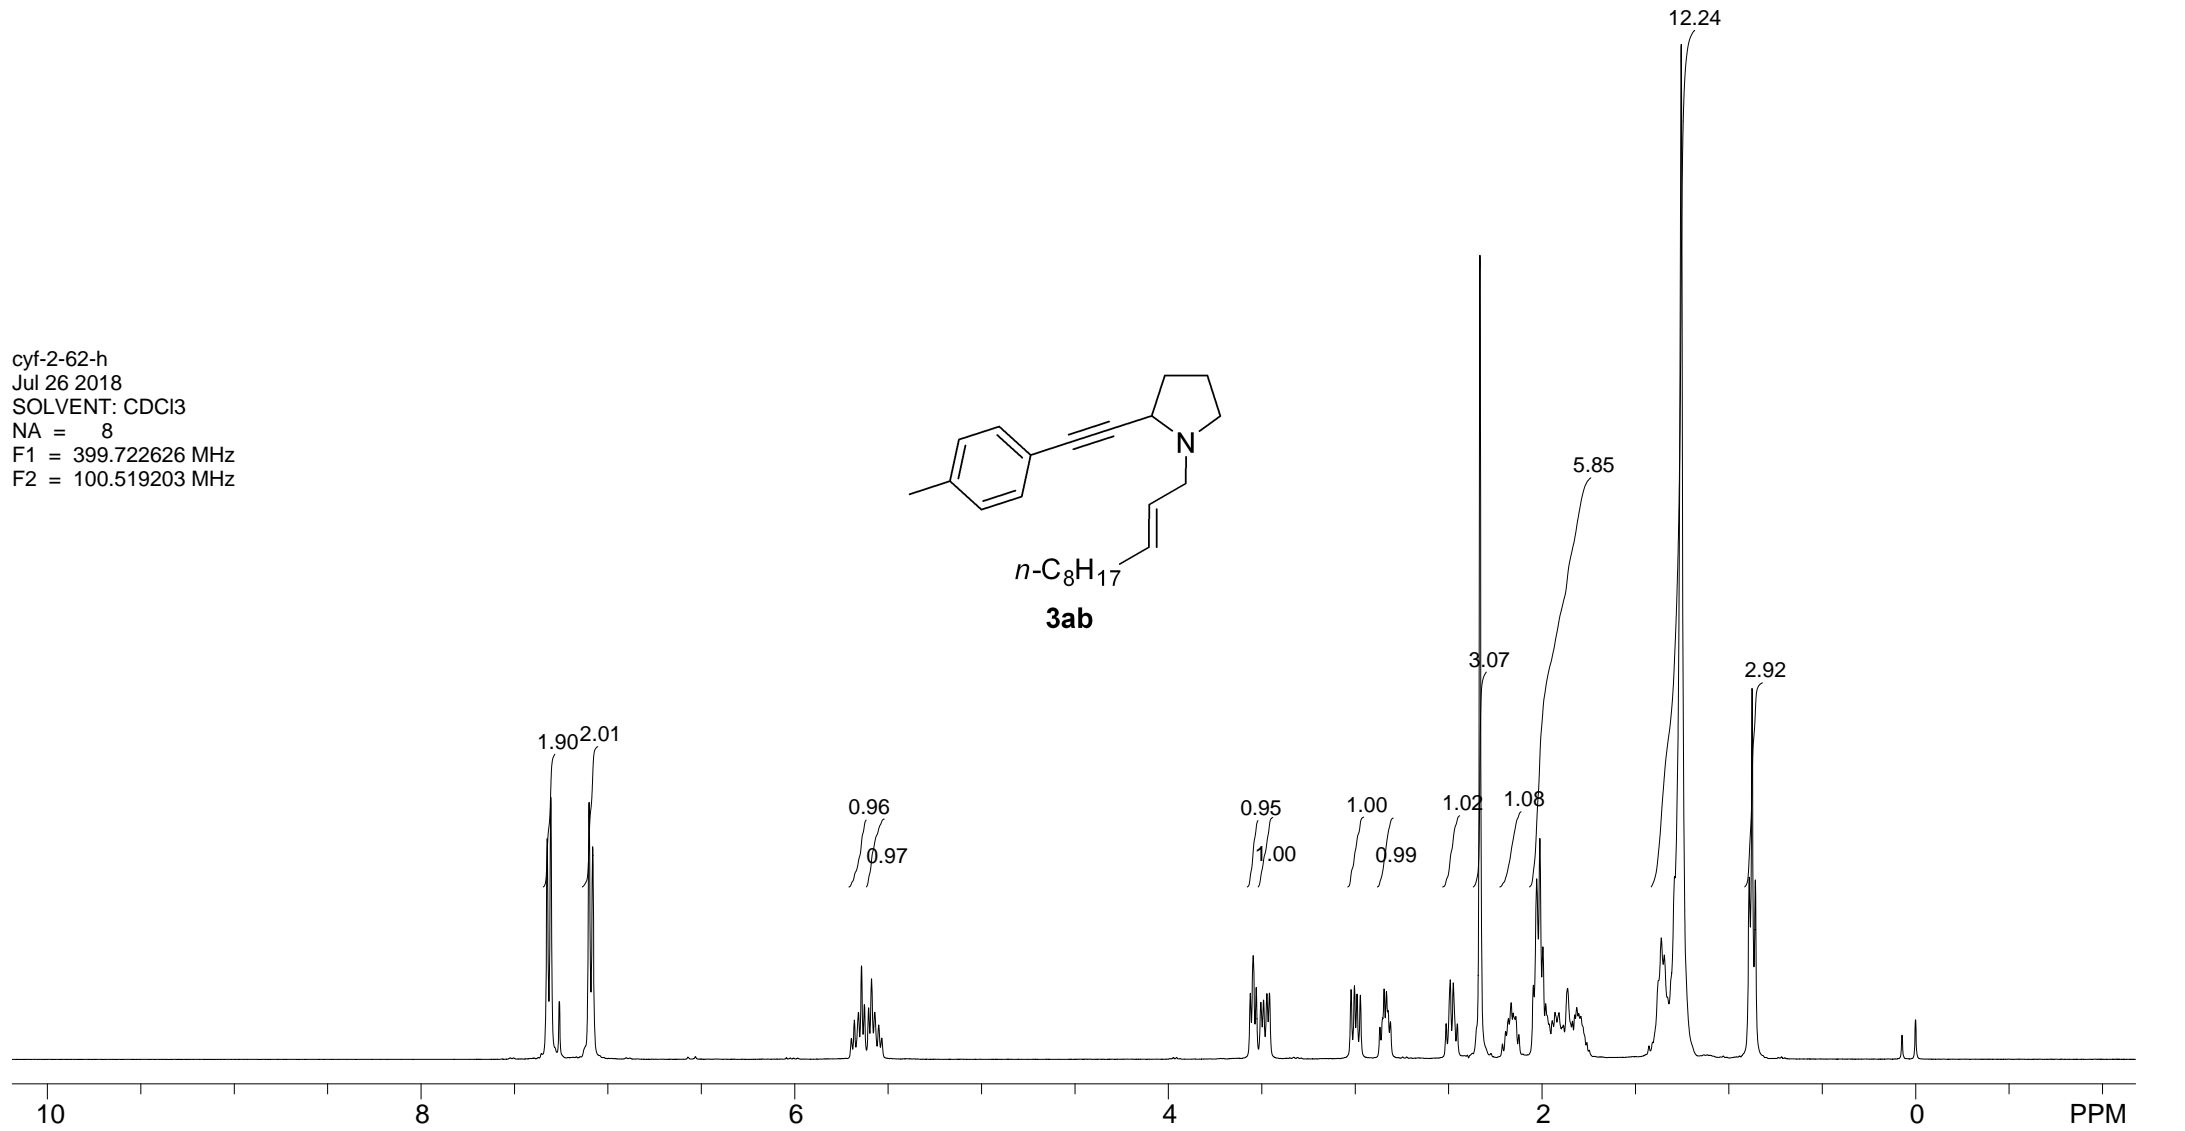

cyf-2-62-c-bruker  
Jul 26 2018  
USER: nmr  
SOLVENT: CDCl3  
NA = 105  
F1 = 100.630371 MHz  
F2 = 1.000000 MHz

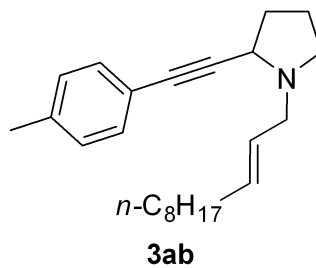

137.723  
133.939  
131.457  
128.807  
126.762  
120.237

87.845  
84.506  
77.322  
77.000  
76.686

55.263  
54.505  
51.510

32.262  
31.787  
31.650  
29.352  
29.199  
29.122  
29.061  
22.581  
21.899  
21.294  
14.018

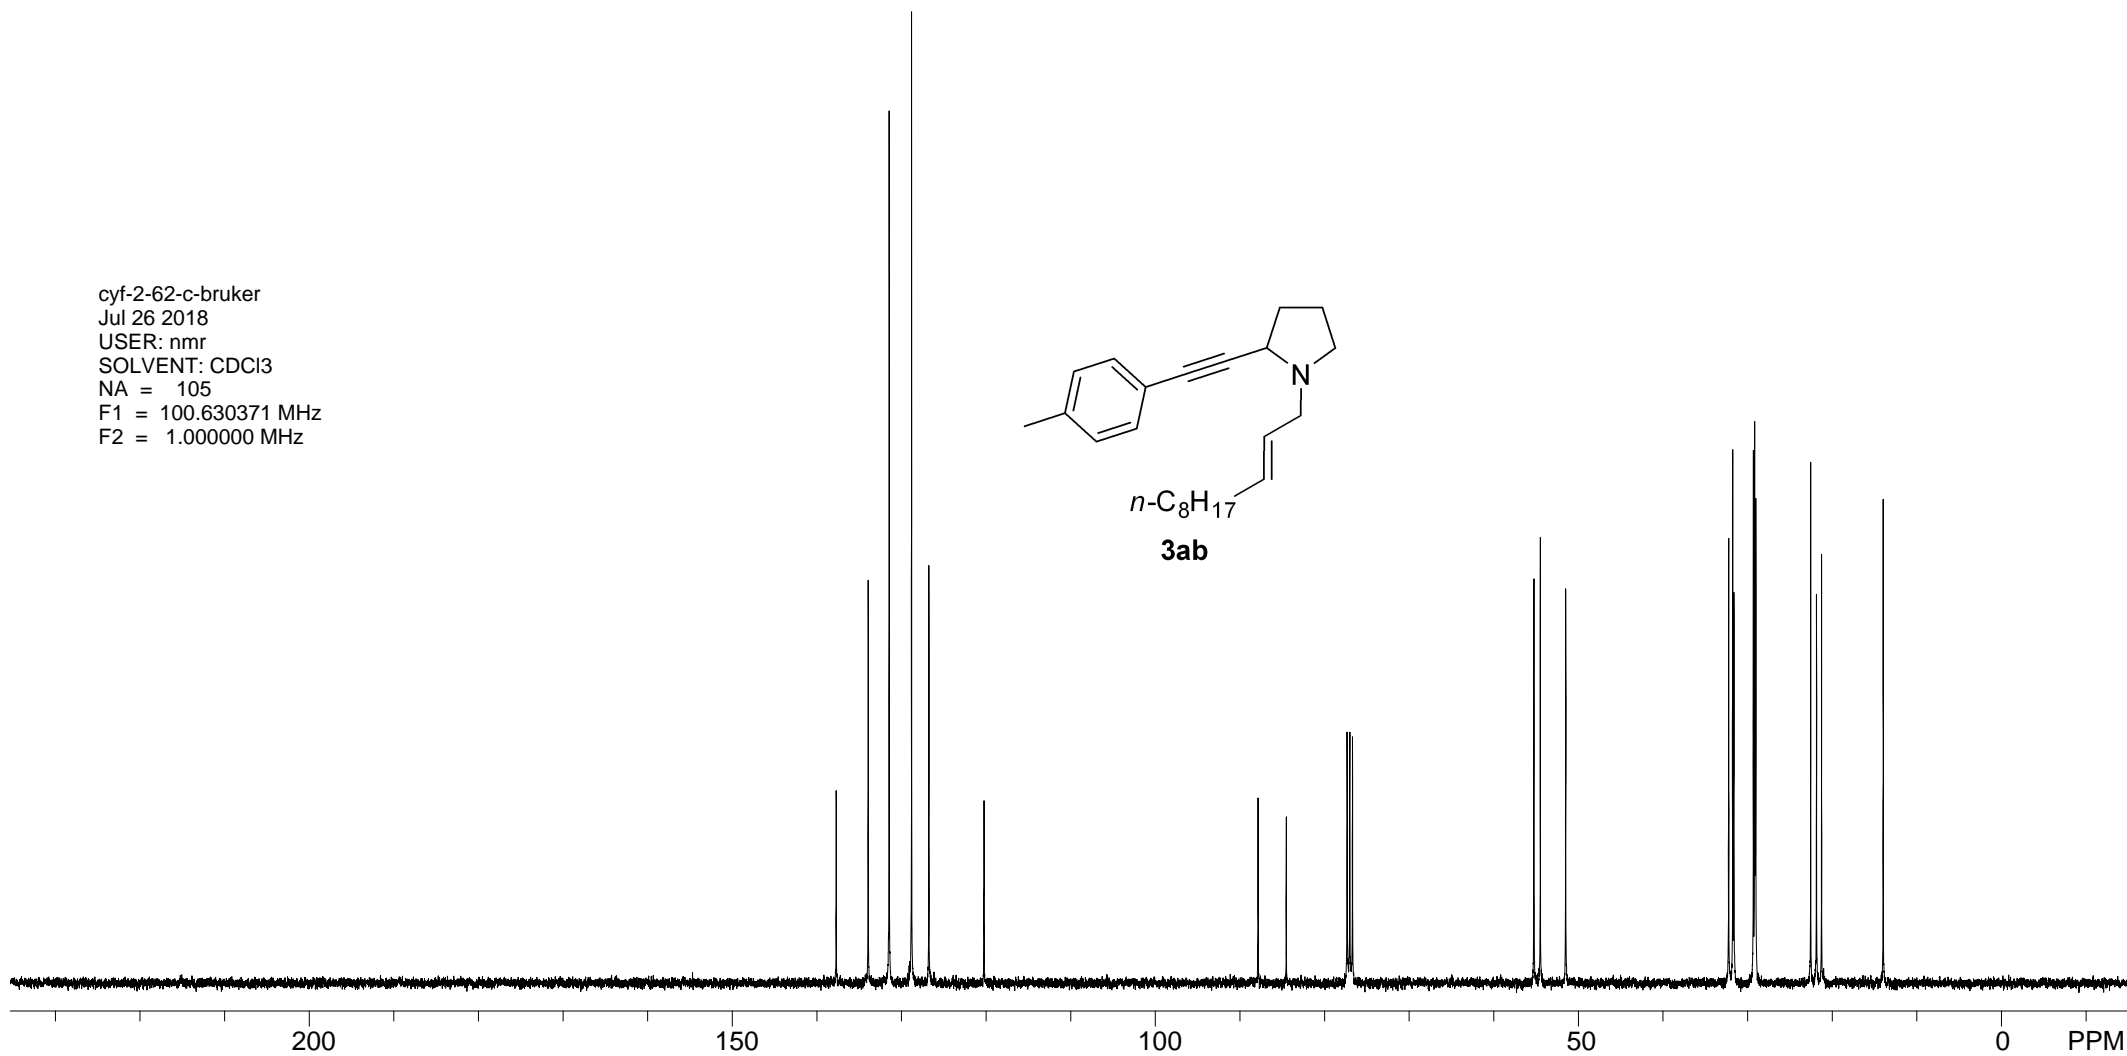

cyf-2-60-h  
Jul 24 2018  
SOLVENT: CDCl3  
NA = 12  
F1 = 399.722626 MHz  
F2 = 100.519203 MHz

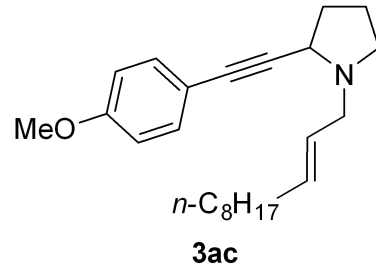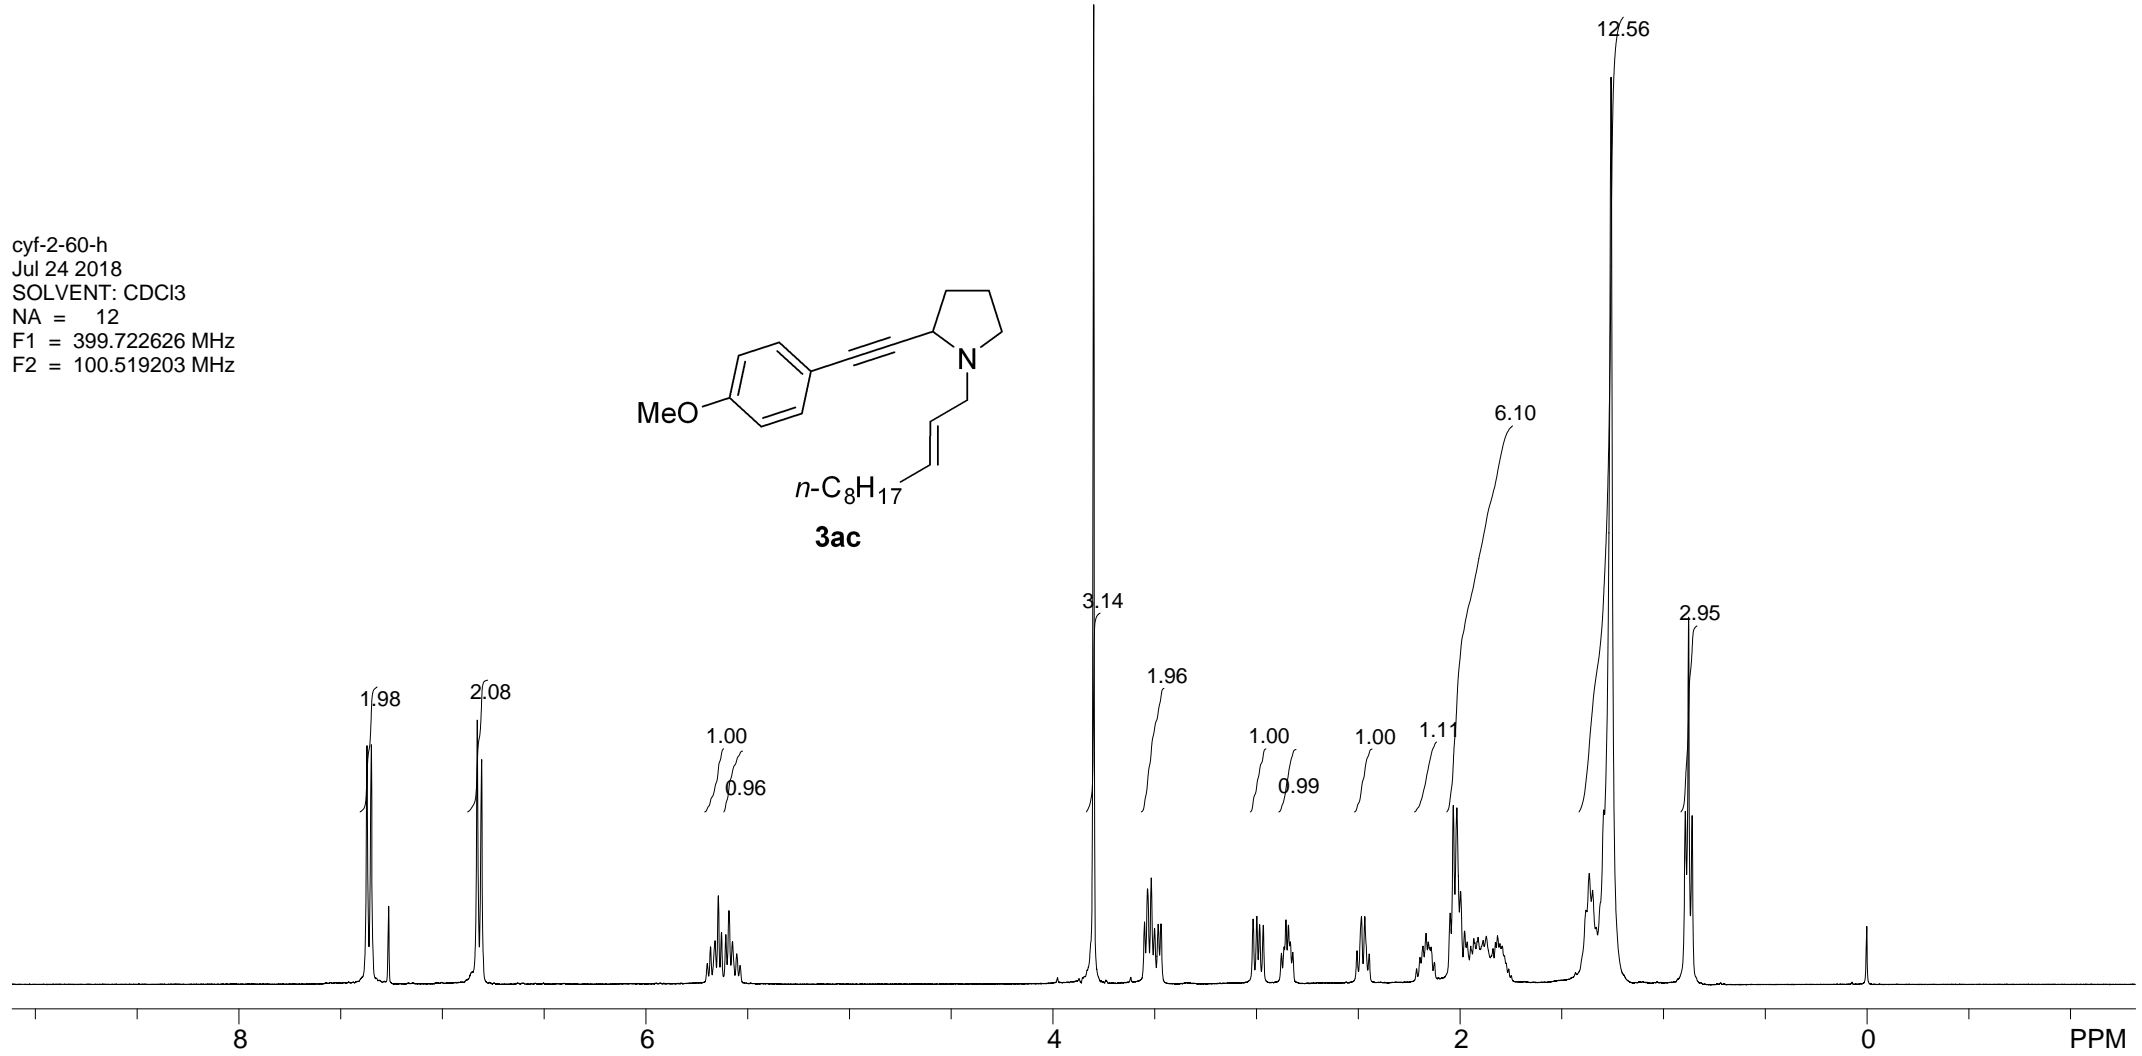

159.199

134.046

132.982

126.701

115.442

113.703

87.041

84.276

77.314

77.000

76.678

55.286

55.140

54.581

51.518

32.285

31.803

31.695

29.367

29.214

29.145

29.076

22.596

21.899

14.033

cyf-2-60-c-bruker  
Aug 15 2018  
SOLVENT: CDCl<sub>3</sub>  
NA = 125  
F1 = 100.630371 MHz  
F2 = 1.000000 MHz

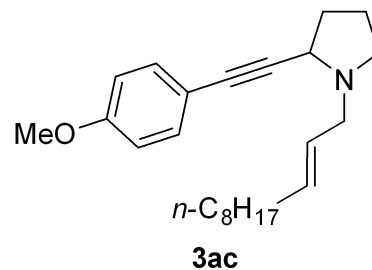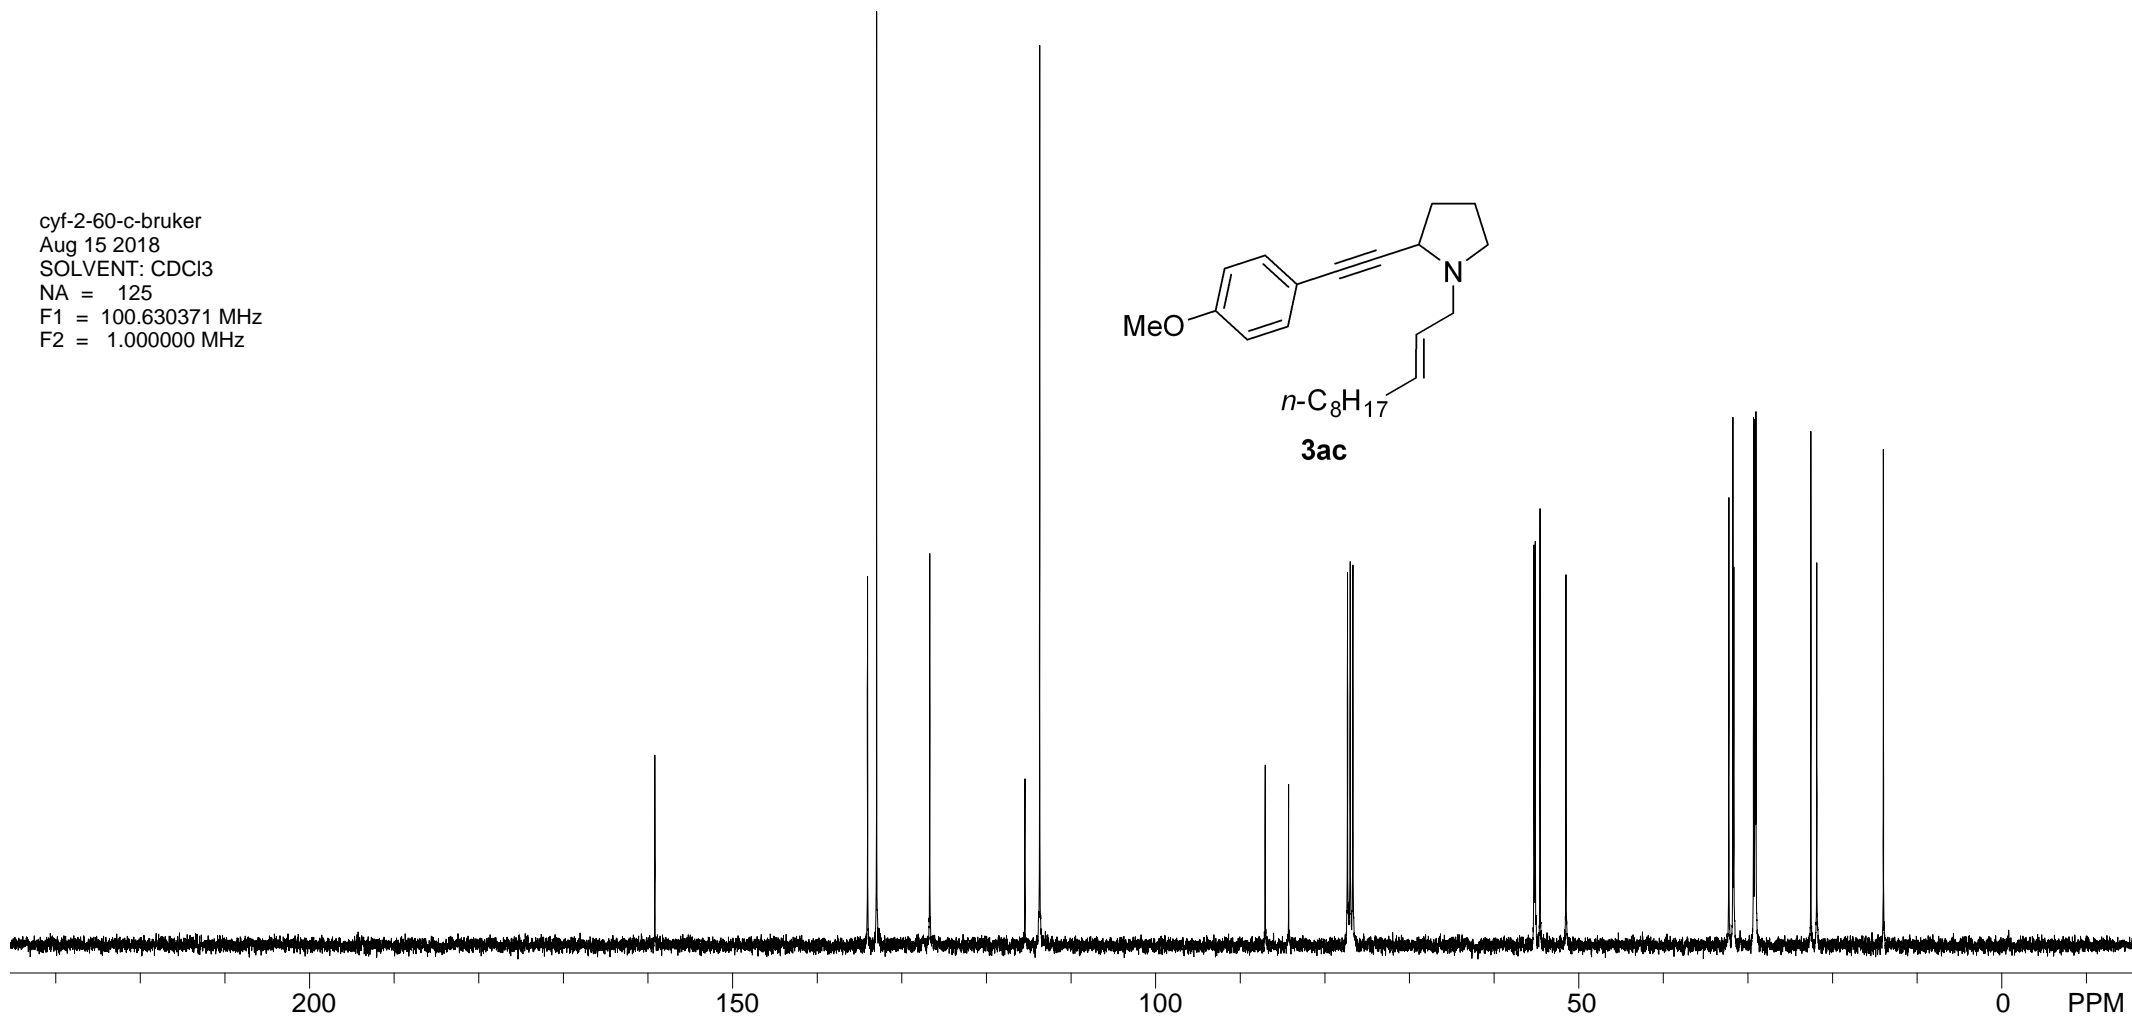



cyf-2-58-h  
Jul 19 2018  
SOLVENT: CDCl3  
NA = 8  
F1 = 399.722015 MHz  
F2 = 100.519203 MHz

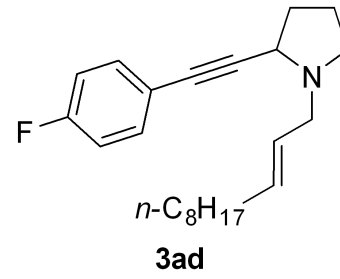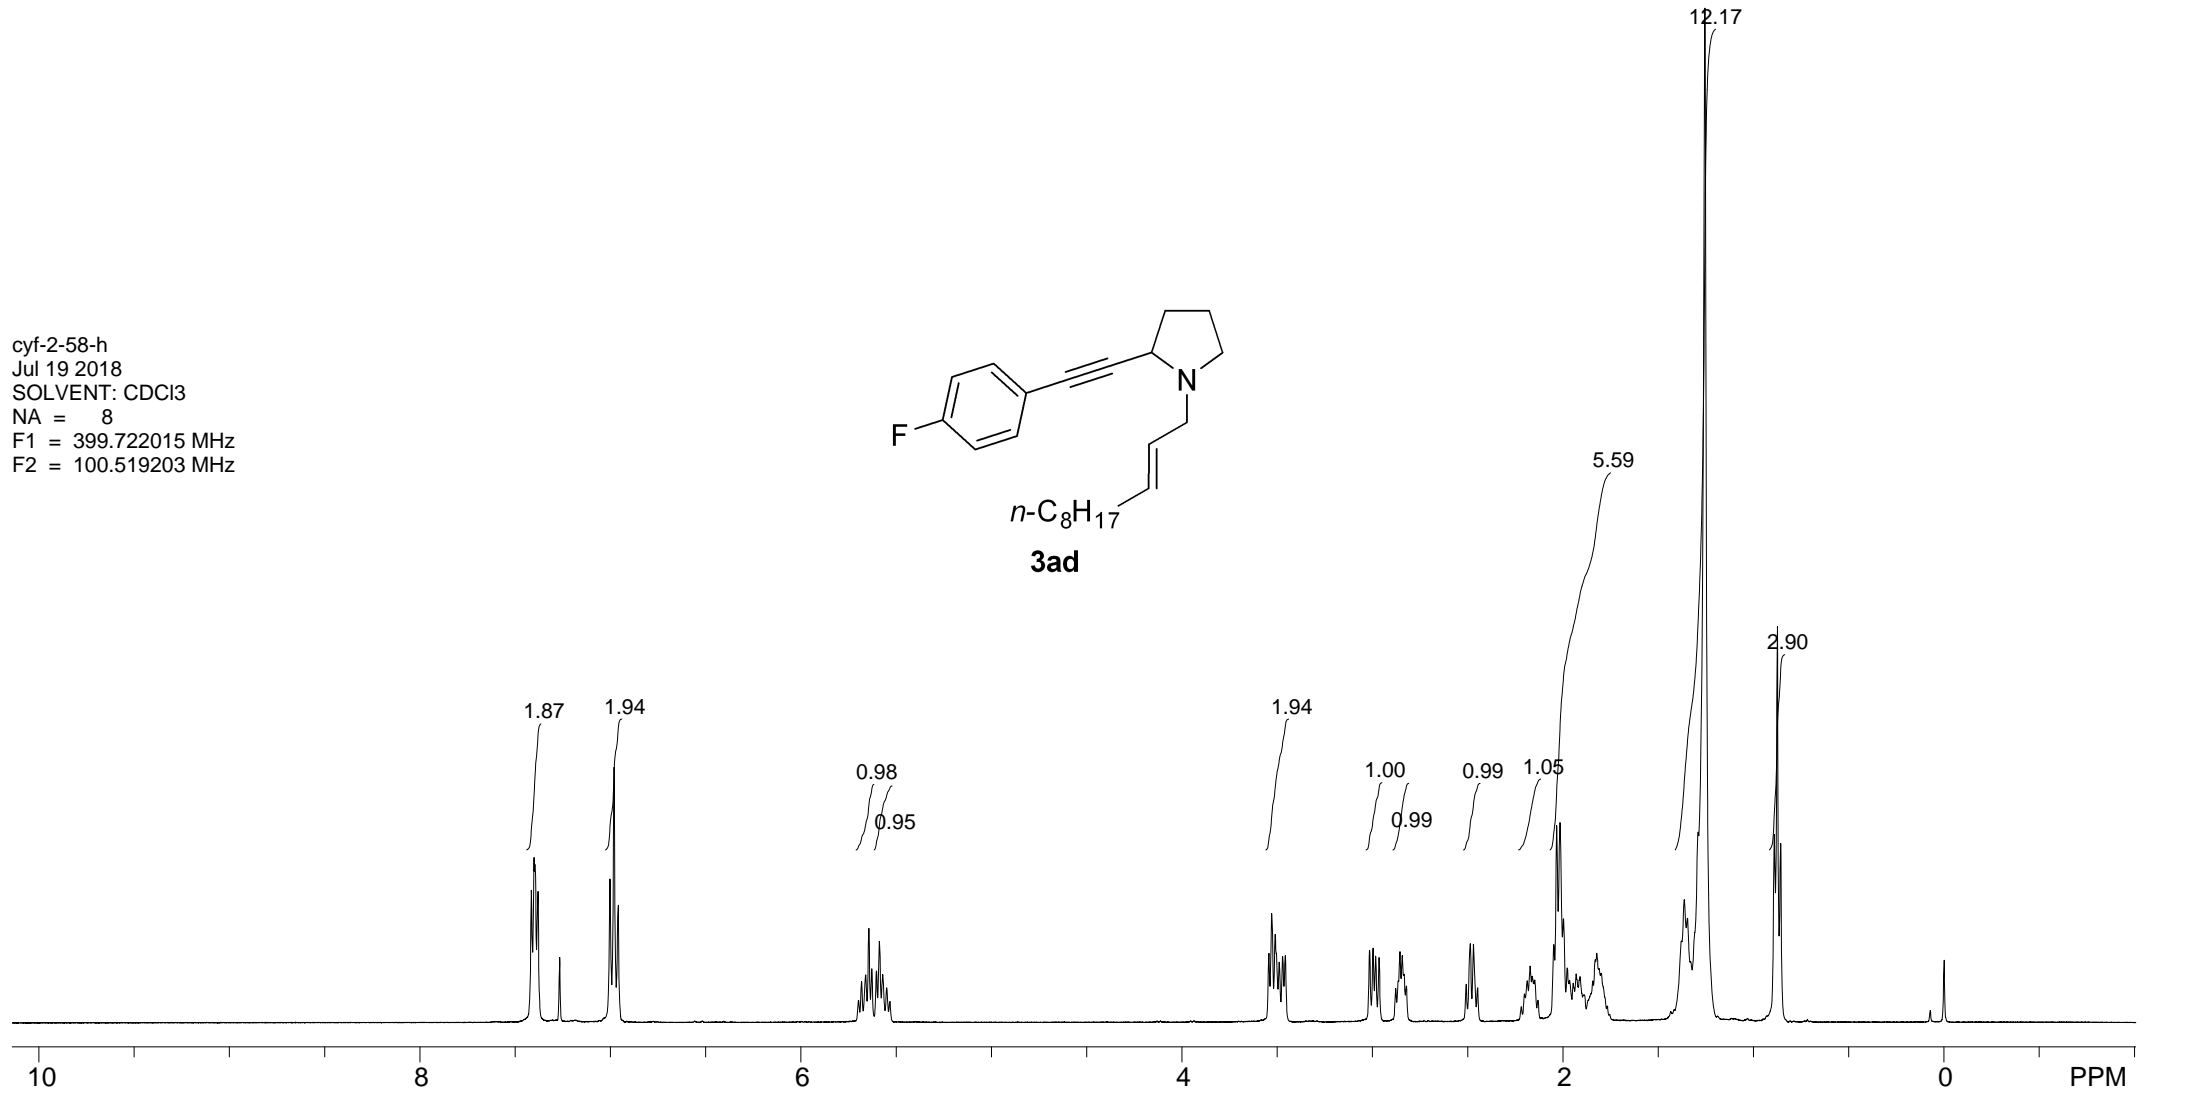

cyf-2-58-C-agilent  
Jul 19 2018  
SOLVENT: CDCl3  
NA = 184  
F1 = 100.521523 MHz  
F2 = 399.722015 MHz

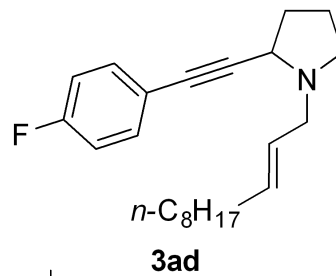

163.430  
160.956

134.099  
133.484  
133.408  
126.690  
119.426  
119.388  
115.463  
115.243

88.470  
83.361  
77.319  
77.000  
76.681

55.381  
54.508  
51.631

32.312  
31.834  
31.675  
29.397  
29.245  
29.169  
29.109  
22.626  
21.981  
14.064

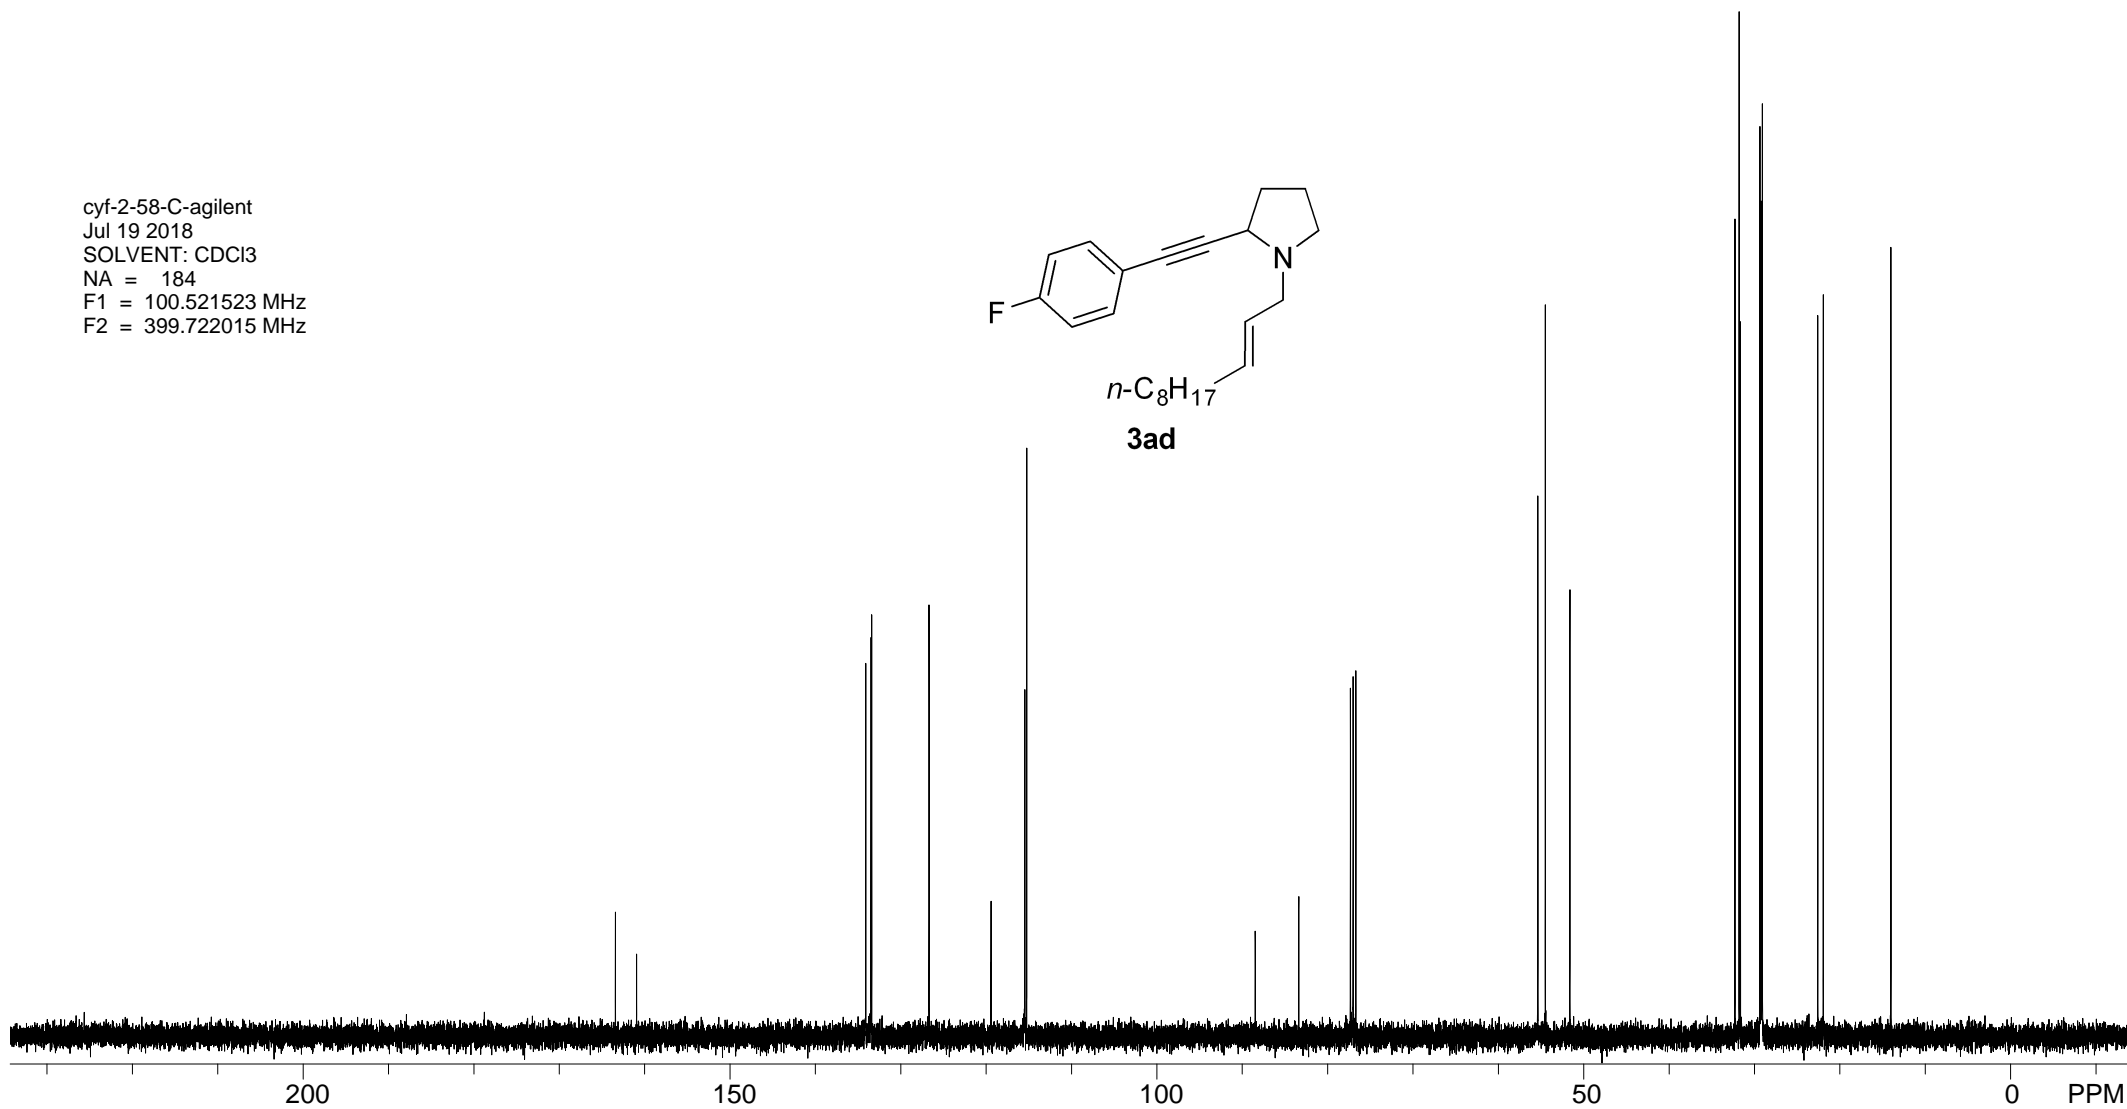

0.000

112.195  
112.219  
112.230  
112.242  
112.265

cyf-2-58-f  
Aug 14 2018  
SOLVENT: CDCl3  
NA = 8  
F1 = 376.058044 MHz  
F2 = 399.722015 MHz

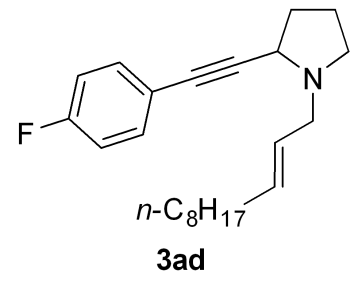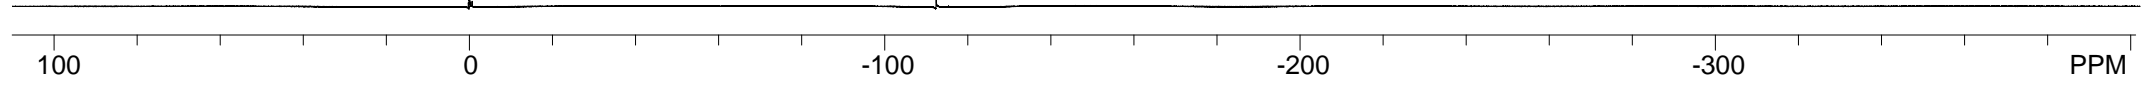

lwl-7-198H-400M  
Dec 28 2015  
SOLVENT: CDCl3  
NA = 8  
F1 = 399.722626 MHz  
F2 = 100.519203 MHz

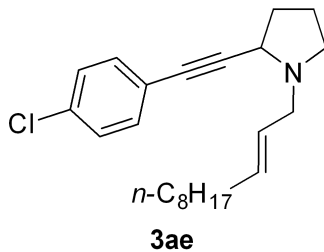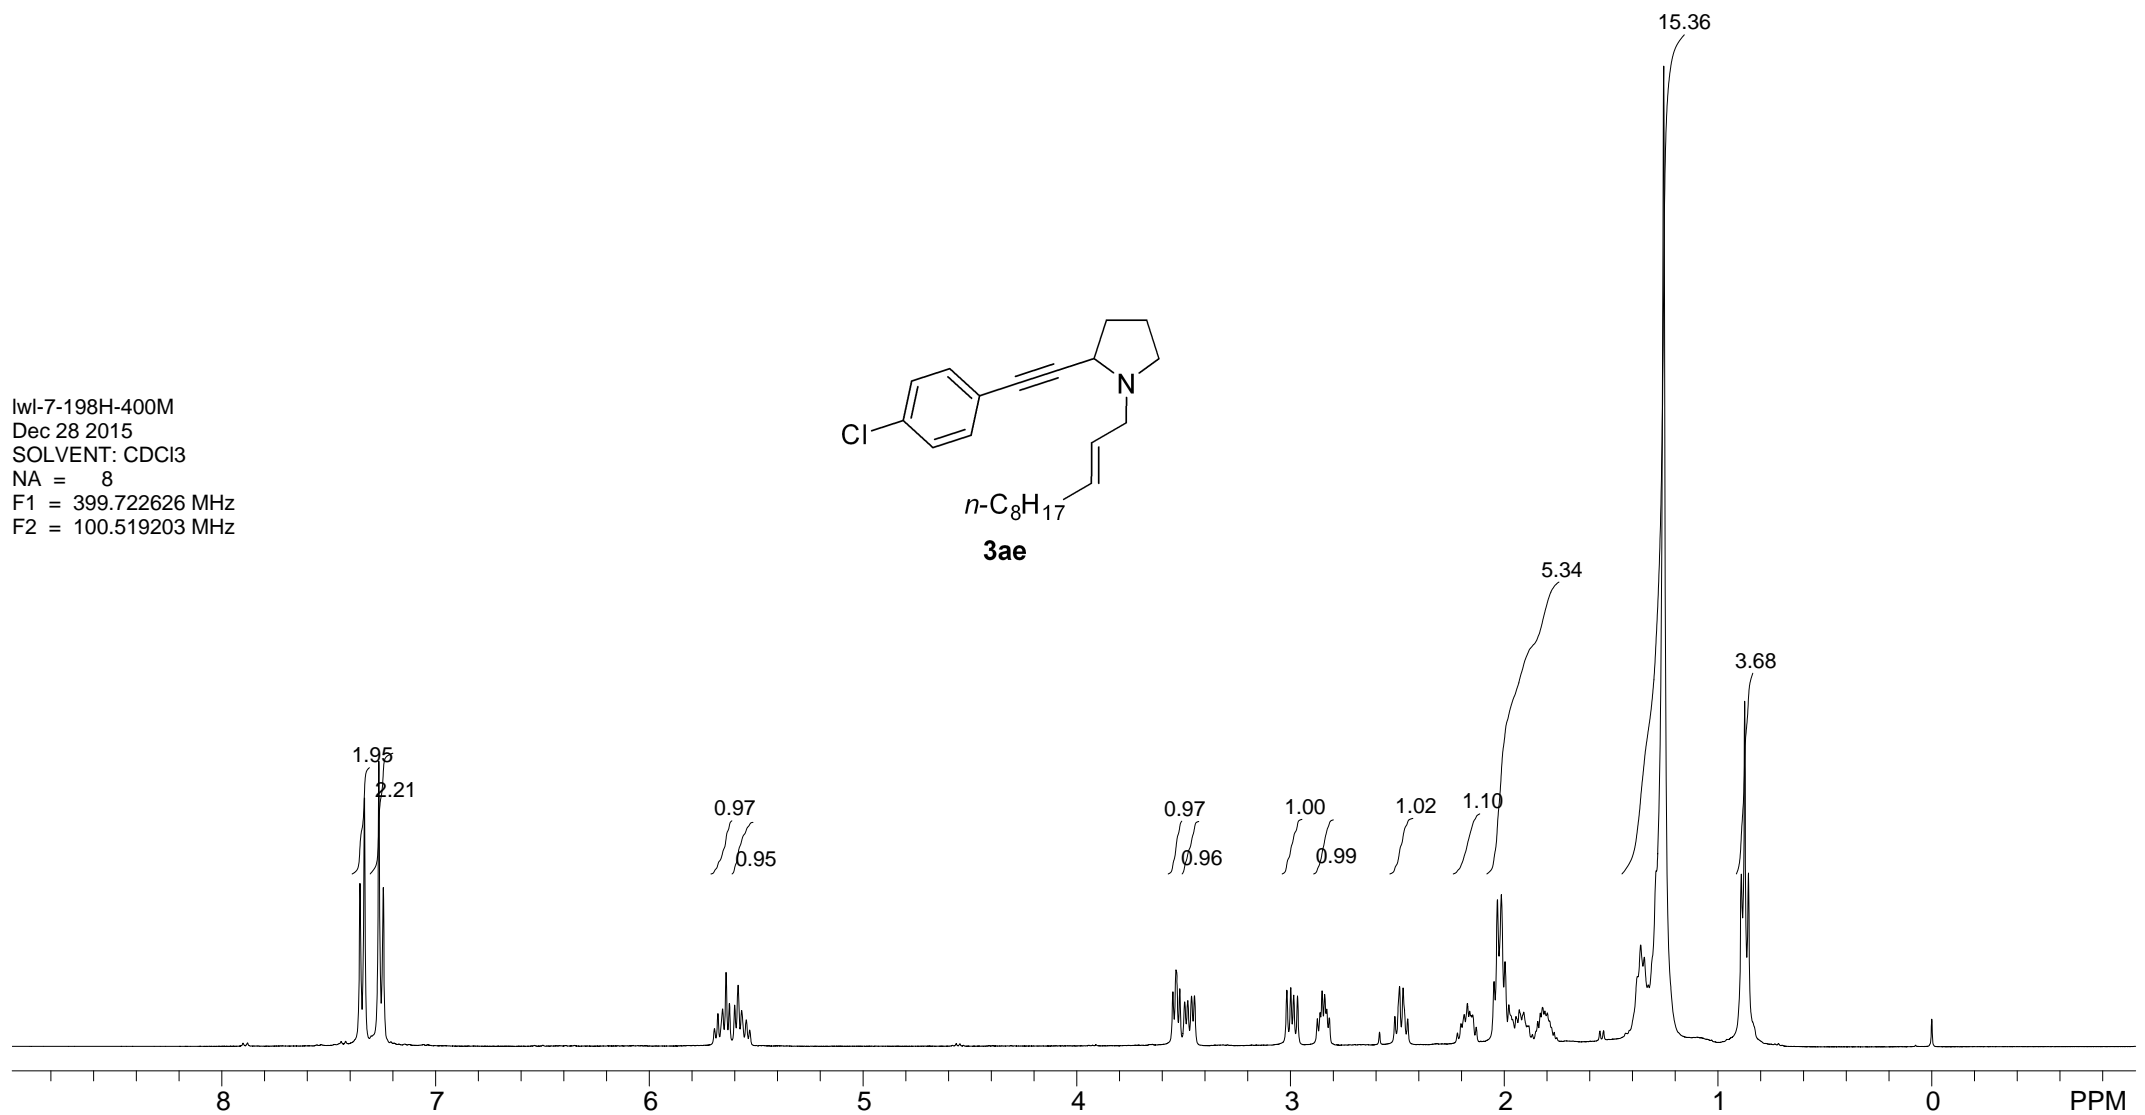

lwl-7-198C-400M  
Dec 28 2015  
SOLVENT: CDCl3  
NA = 128  
F1 = 100.520737 MHz  
F2 = 399.722015 MHz

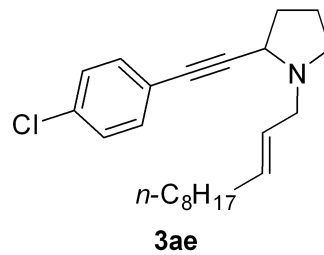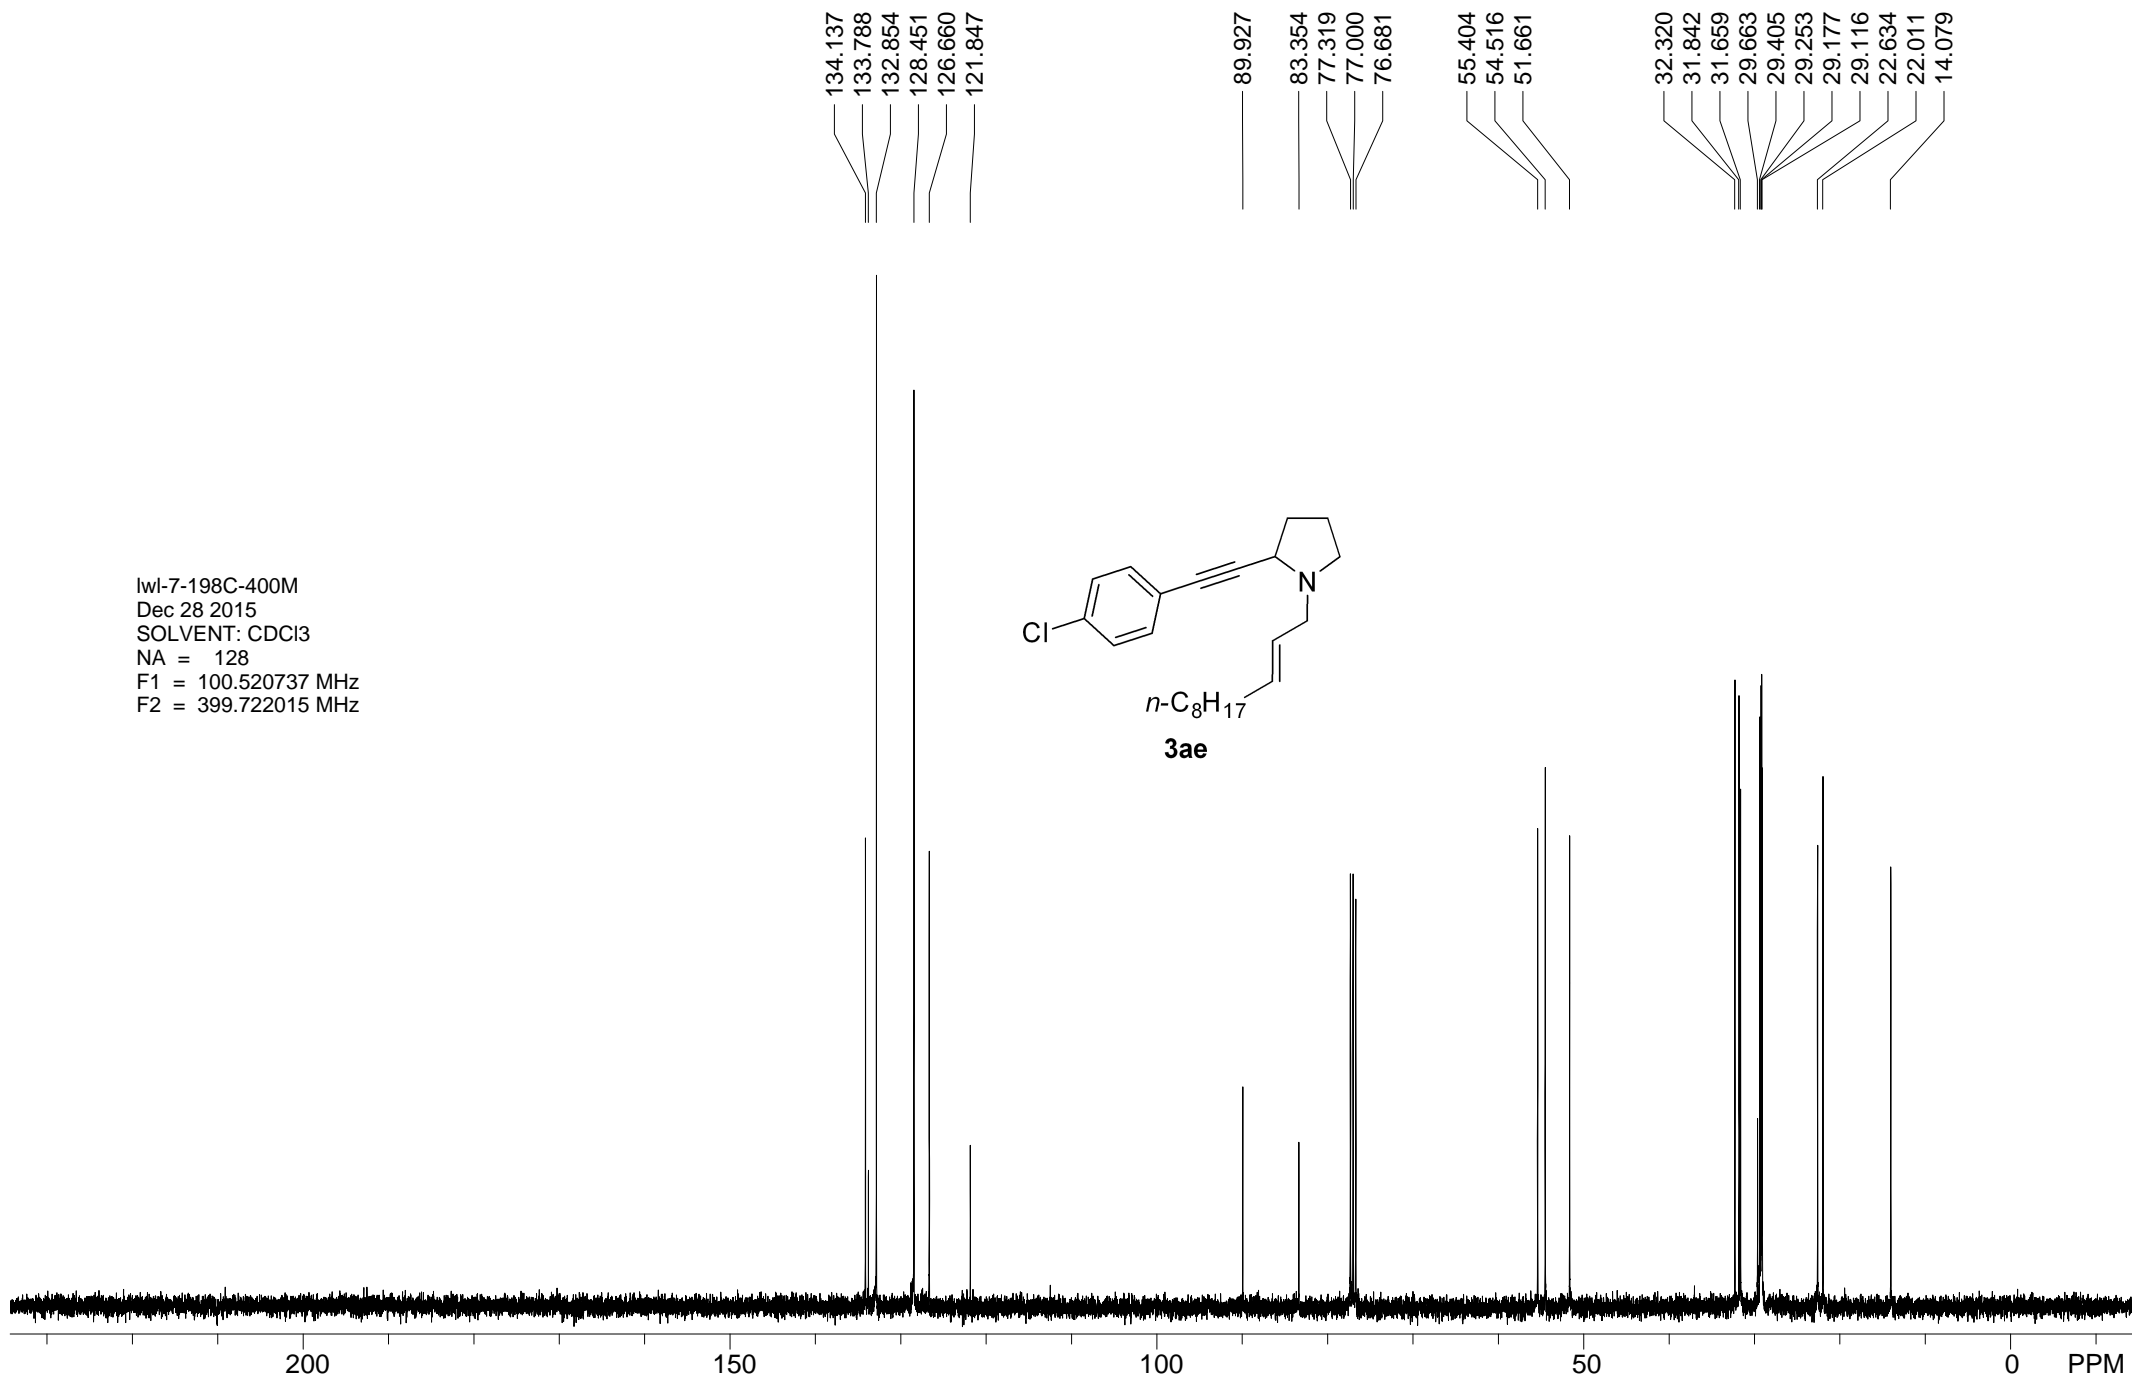

lwl-8-57H-400M  
Jul 18 2017  
SOLVENT: CDCl3  
NA = 8  
F1 = 399.722809 MHz  
F2 = 100.519203 MHz

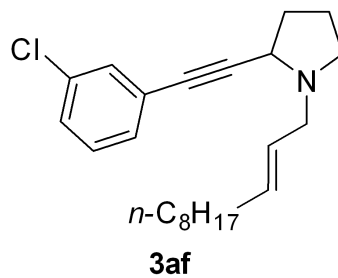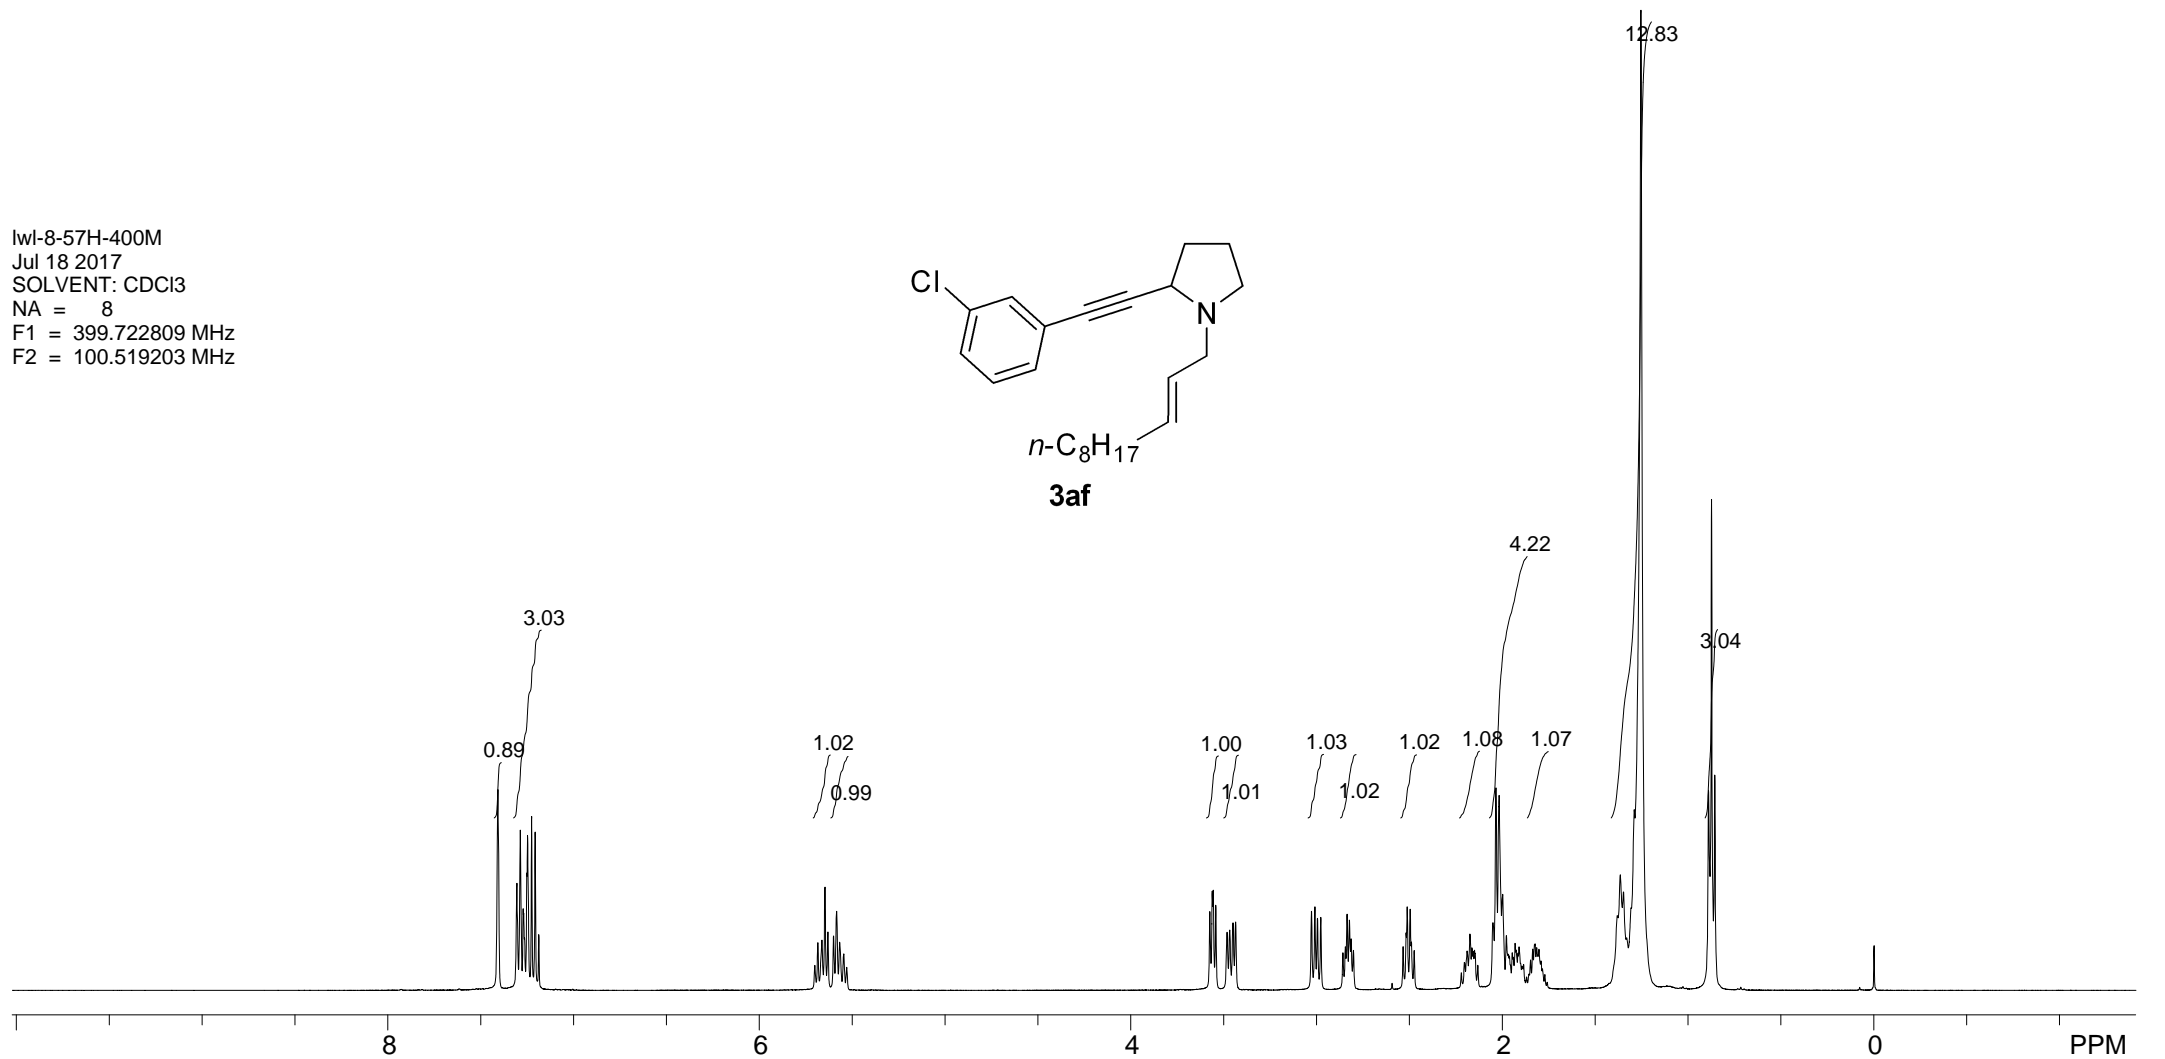

134.126  
133.907  
131.494  
129.723  
129.327  
128.070  
126.636  
125.042

90.208  
83.140  
77.312  
77.000  
76.679

55.324  
54.379  
51.596

32.306  
31.825  
31.598  
29.388  
29.236  
29.152  
29.101  
22.624  
21.983  
14.071

lwl-8-57C-400M  
Jul 18 2017  
SOLVENT: CDCl3  
NA = 104  
F1 = 100.522041 MHz  
F2 = 399.722015 MHz

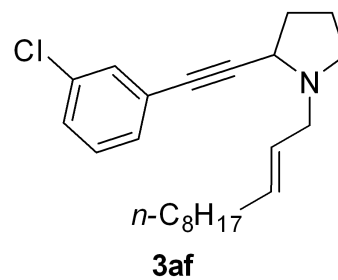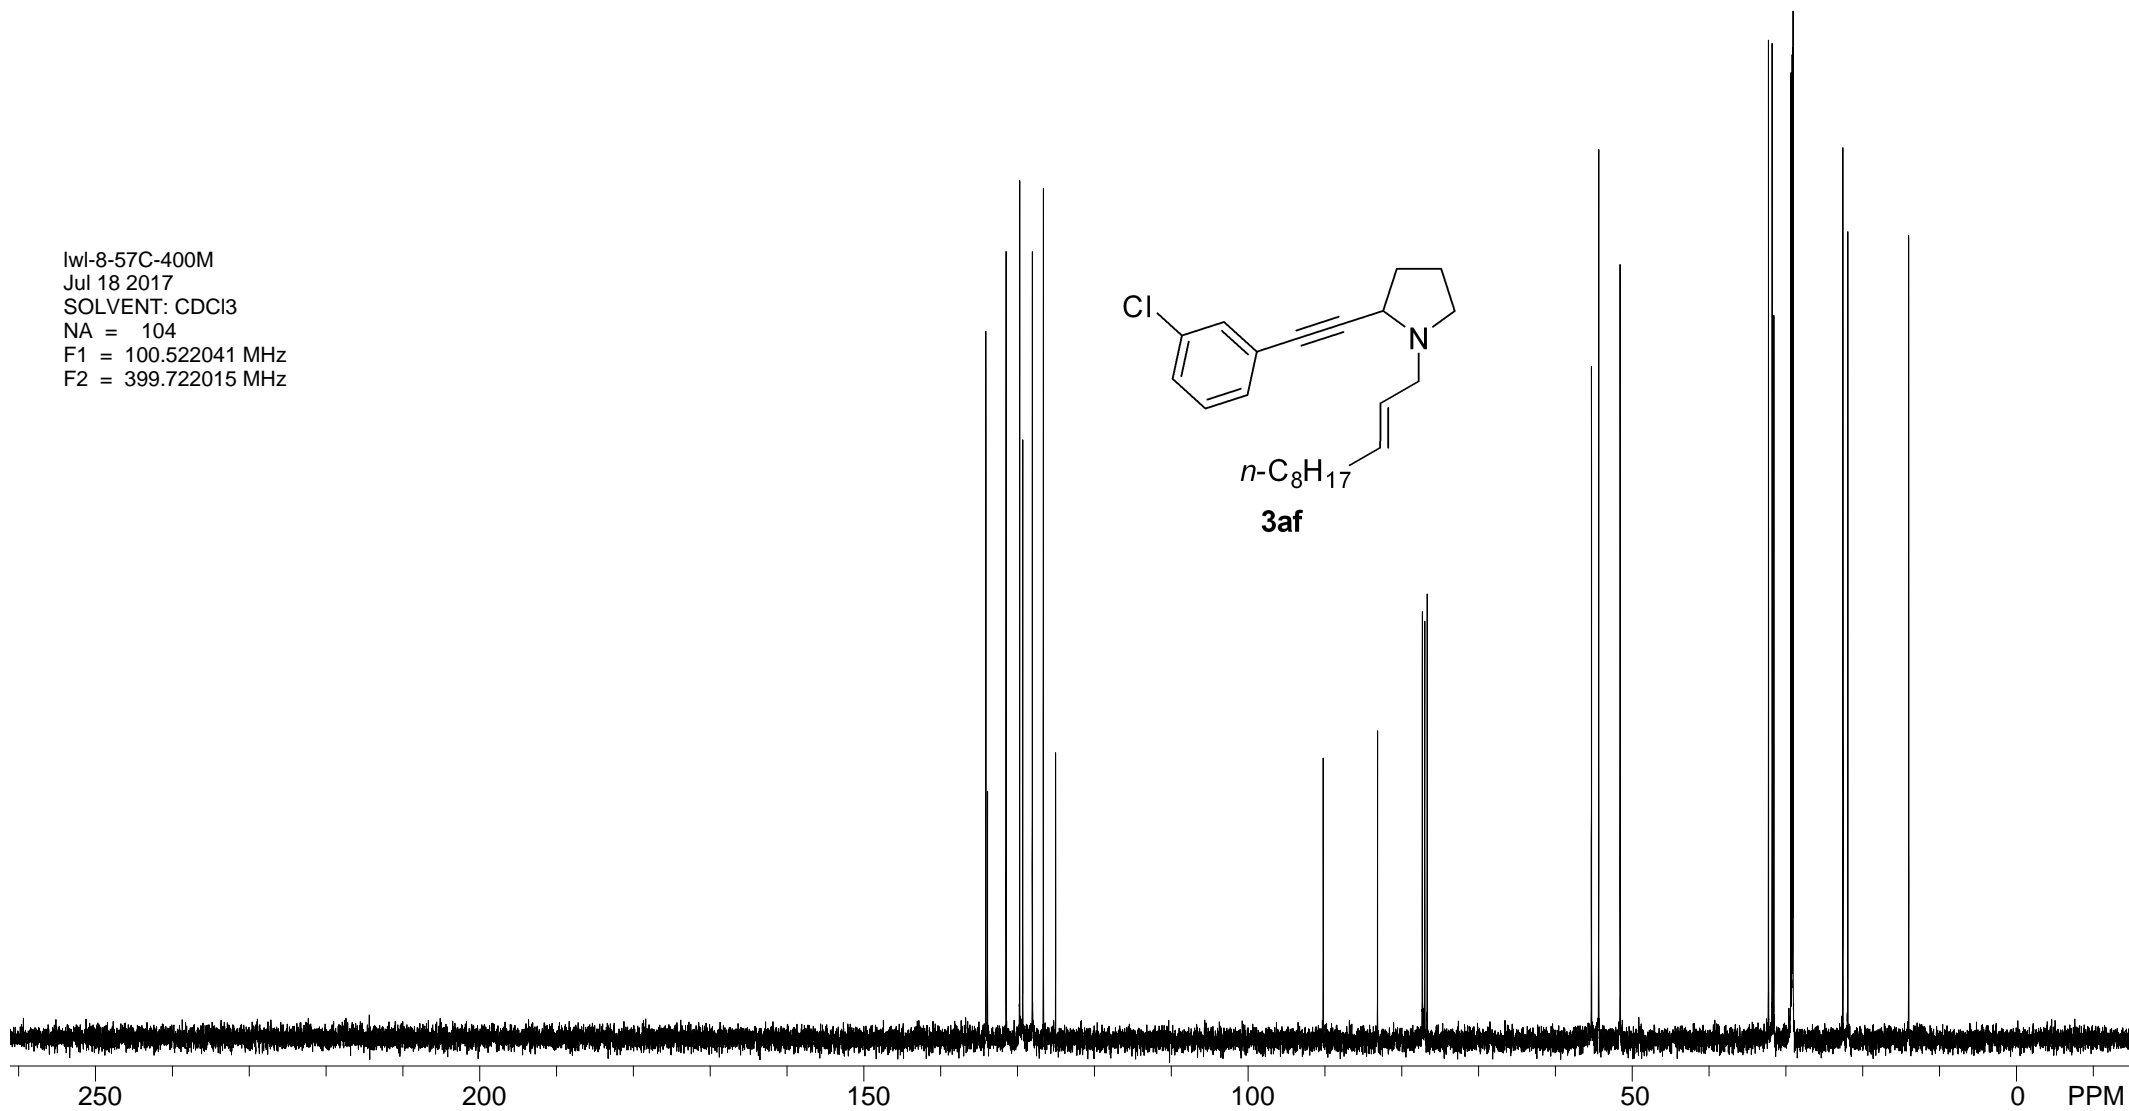

lwl-8-10H-400M  
Apr 3 2016  
SOLVENT: CDCl3  
NA = 8  
F1 = 399.722809 MHz  
F2 = 100.519203 MHz

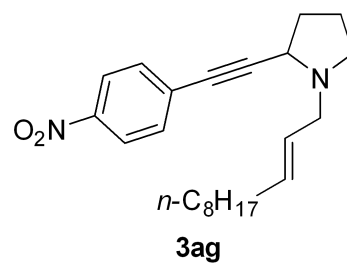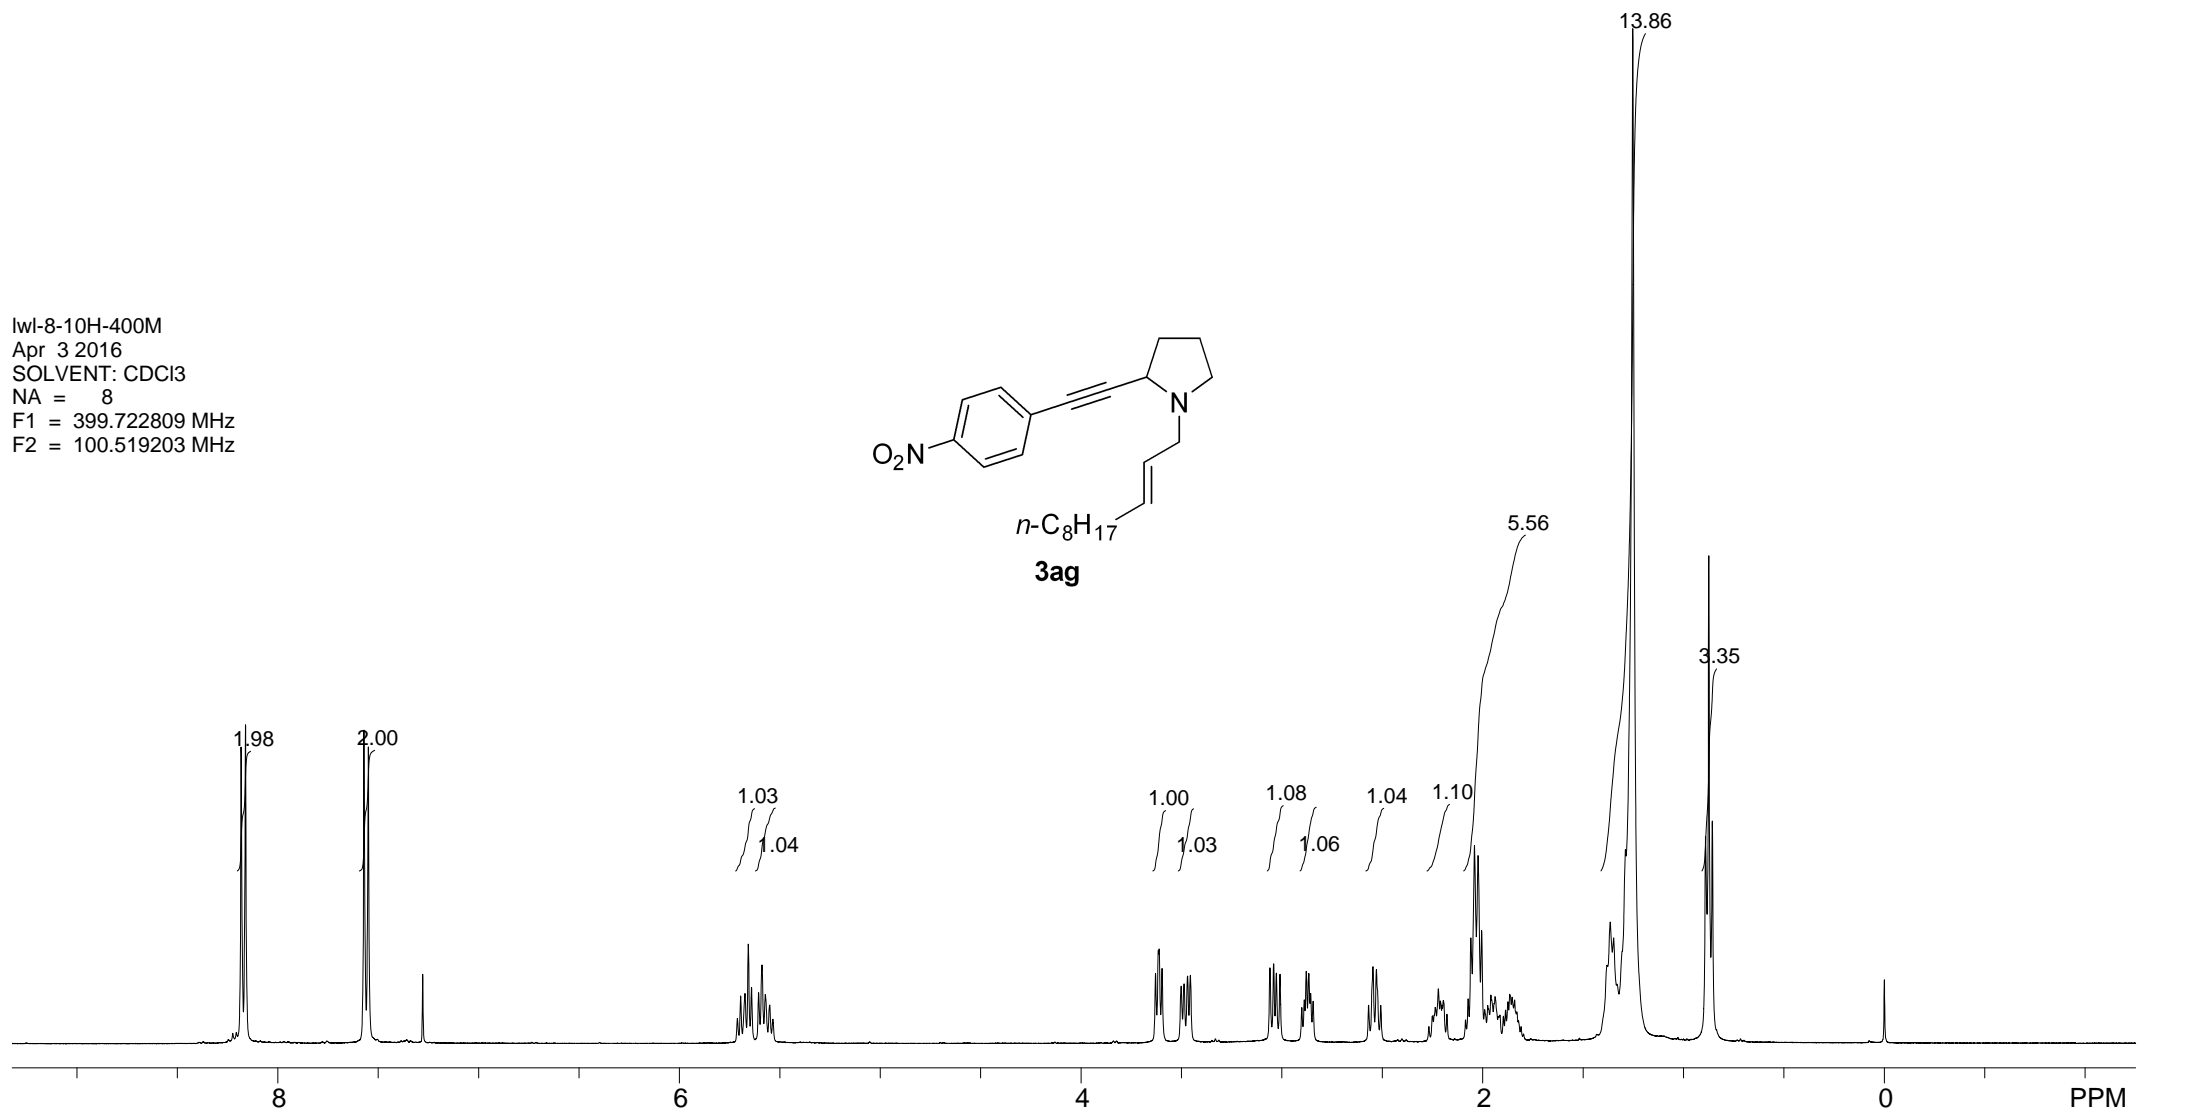



lwl-8-10C-400M  
Apr 3 2016  
SOLVENT: CDCl3  
NA = 128  
F1 = 100.520737 MHz  
F2 = 399.722015 MHz

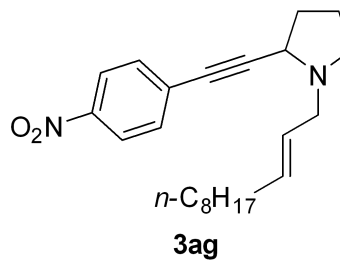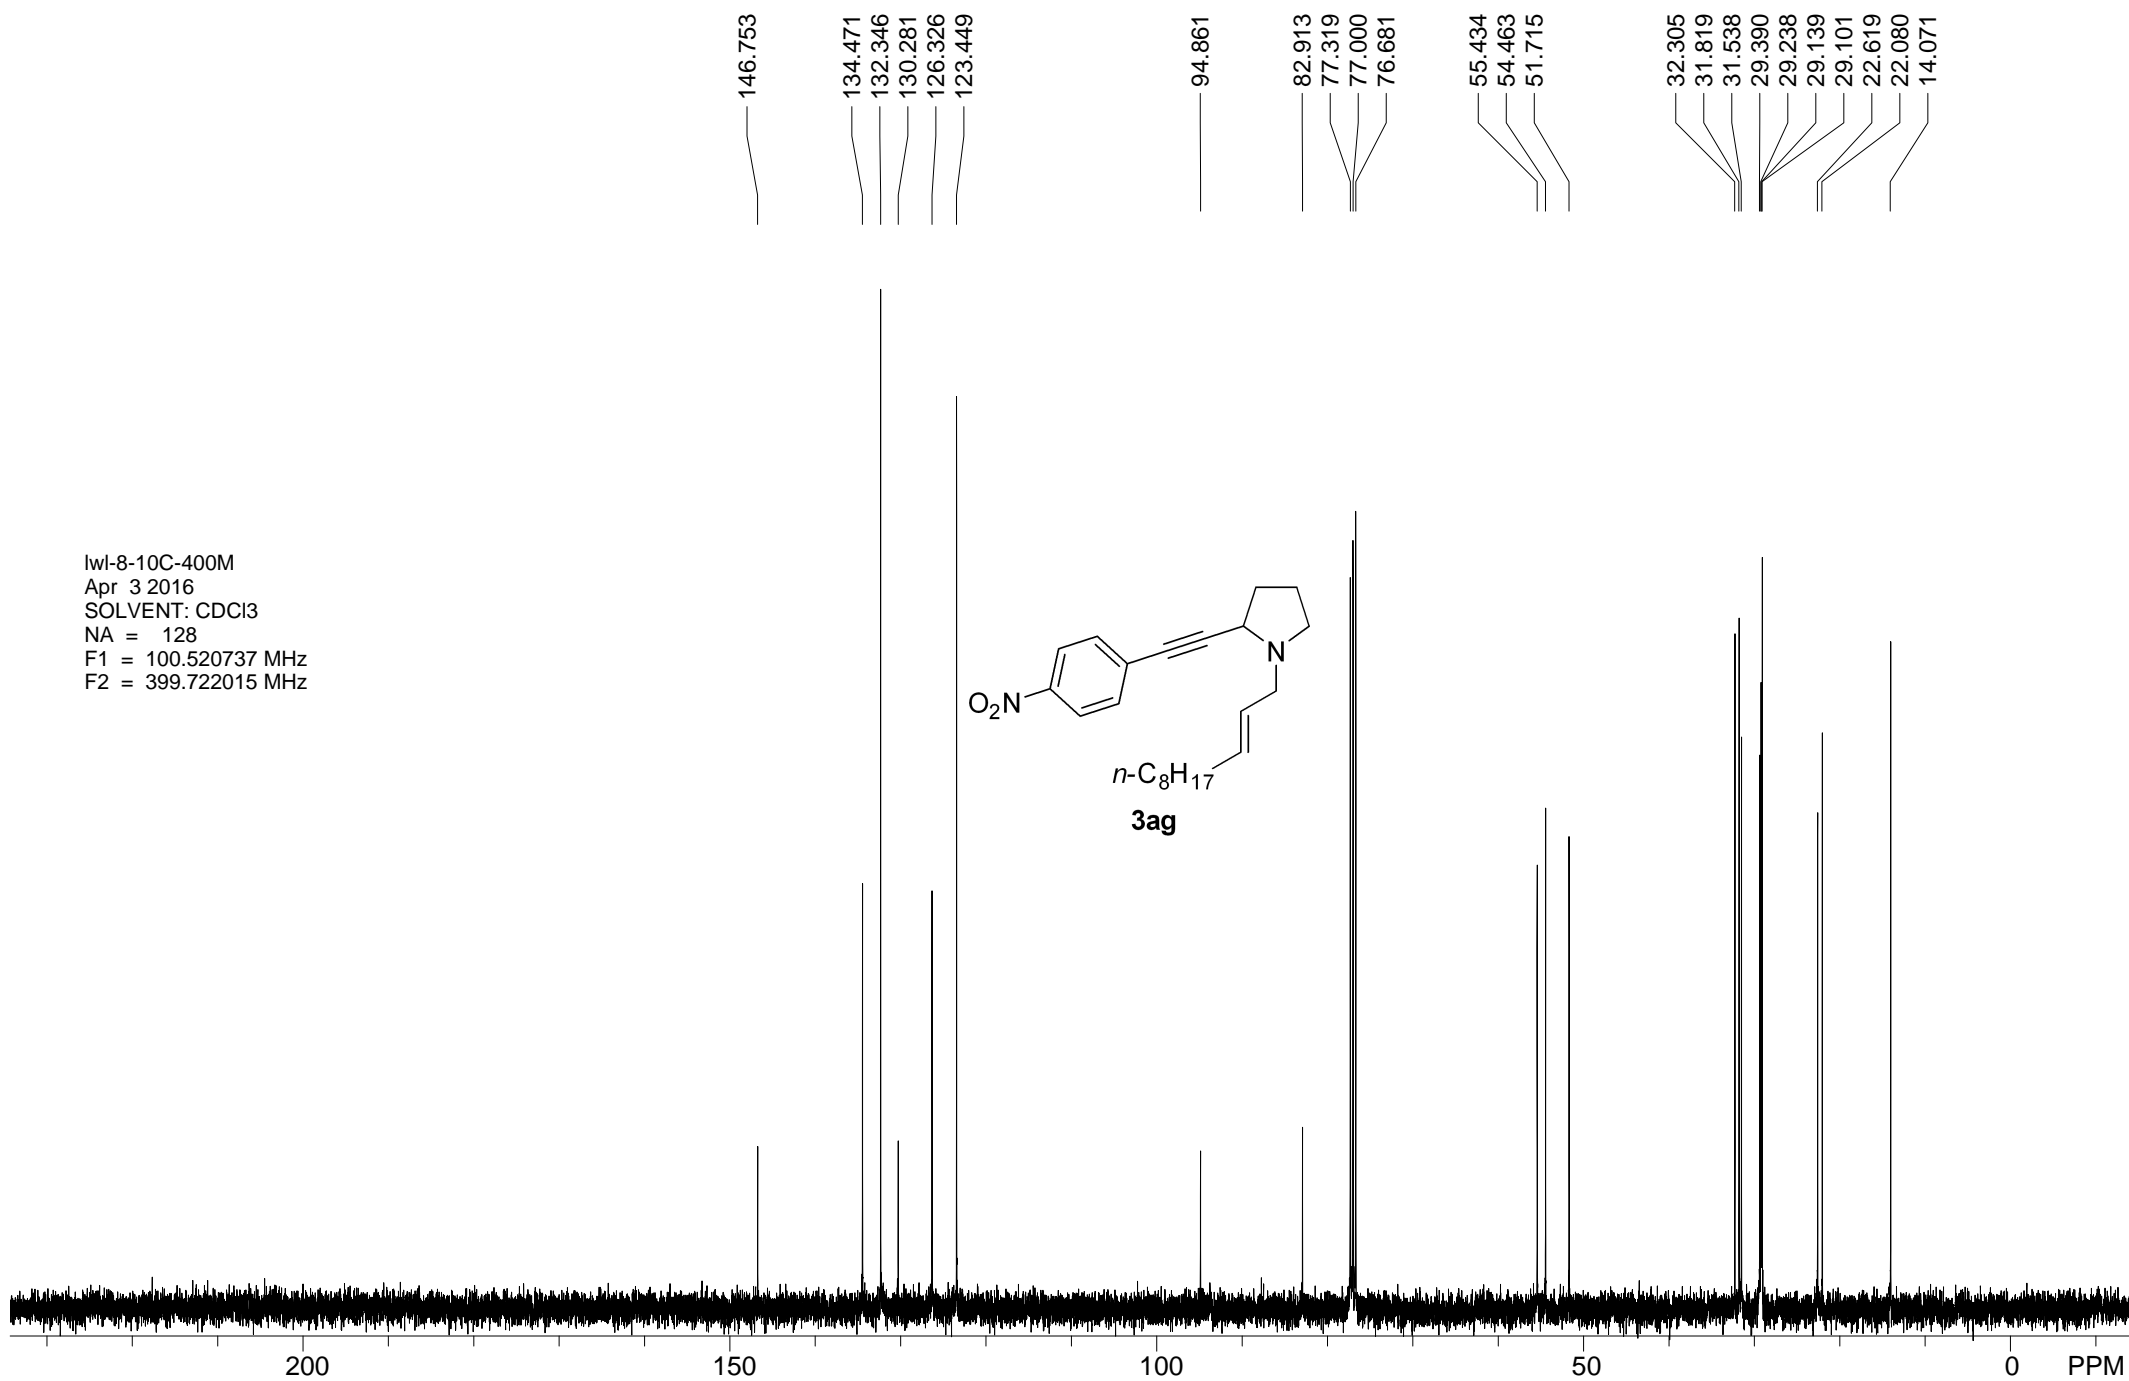

cyf-2-63-h  
Jul 26 2018  
SOLVENT: CDCl3  
NA = 8  
F1 = 399.722626 MHz  
F2 = 100.519203 MHz

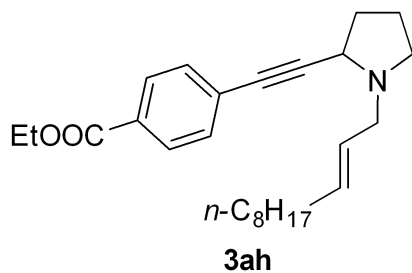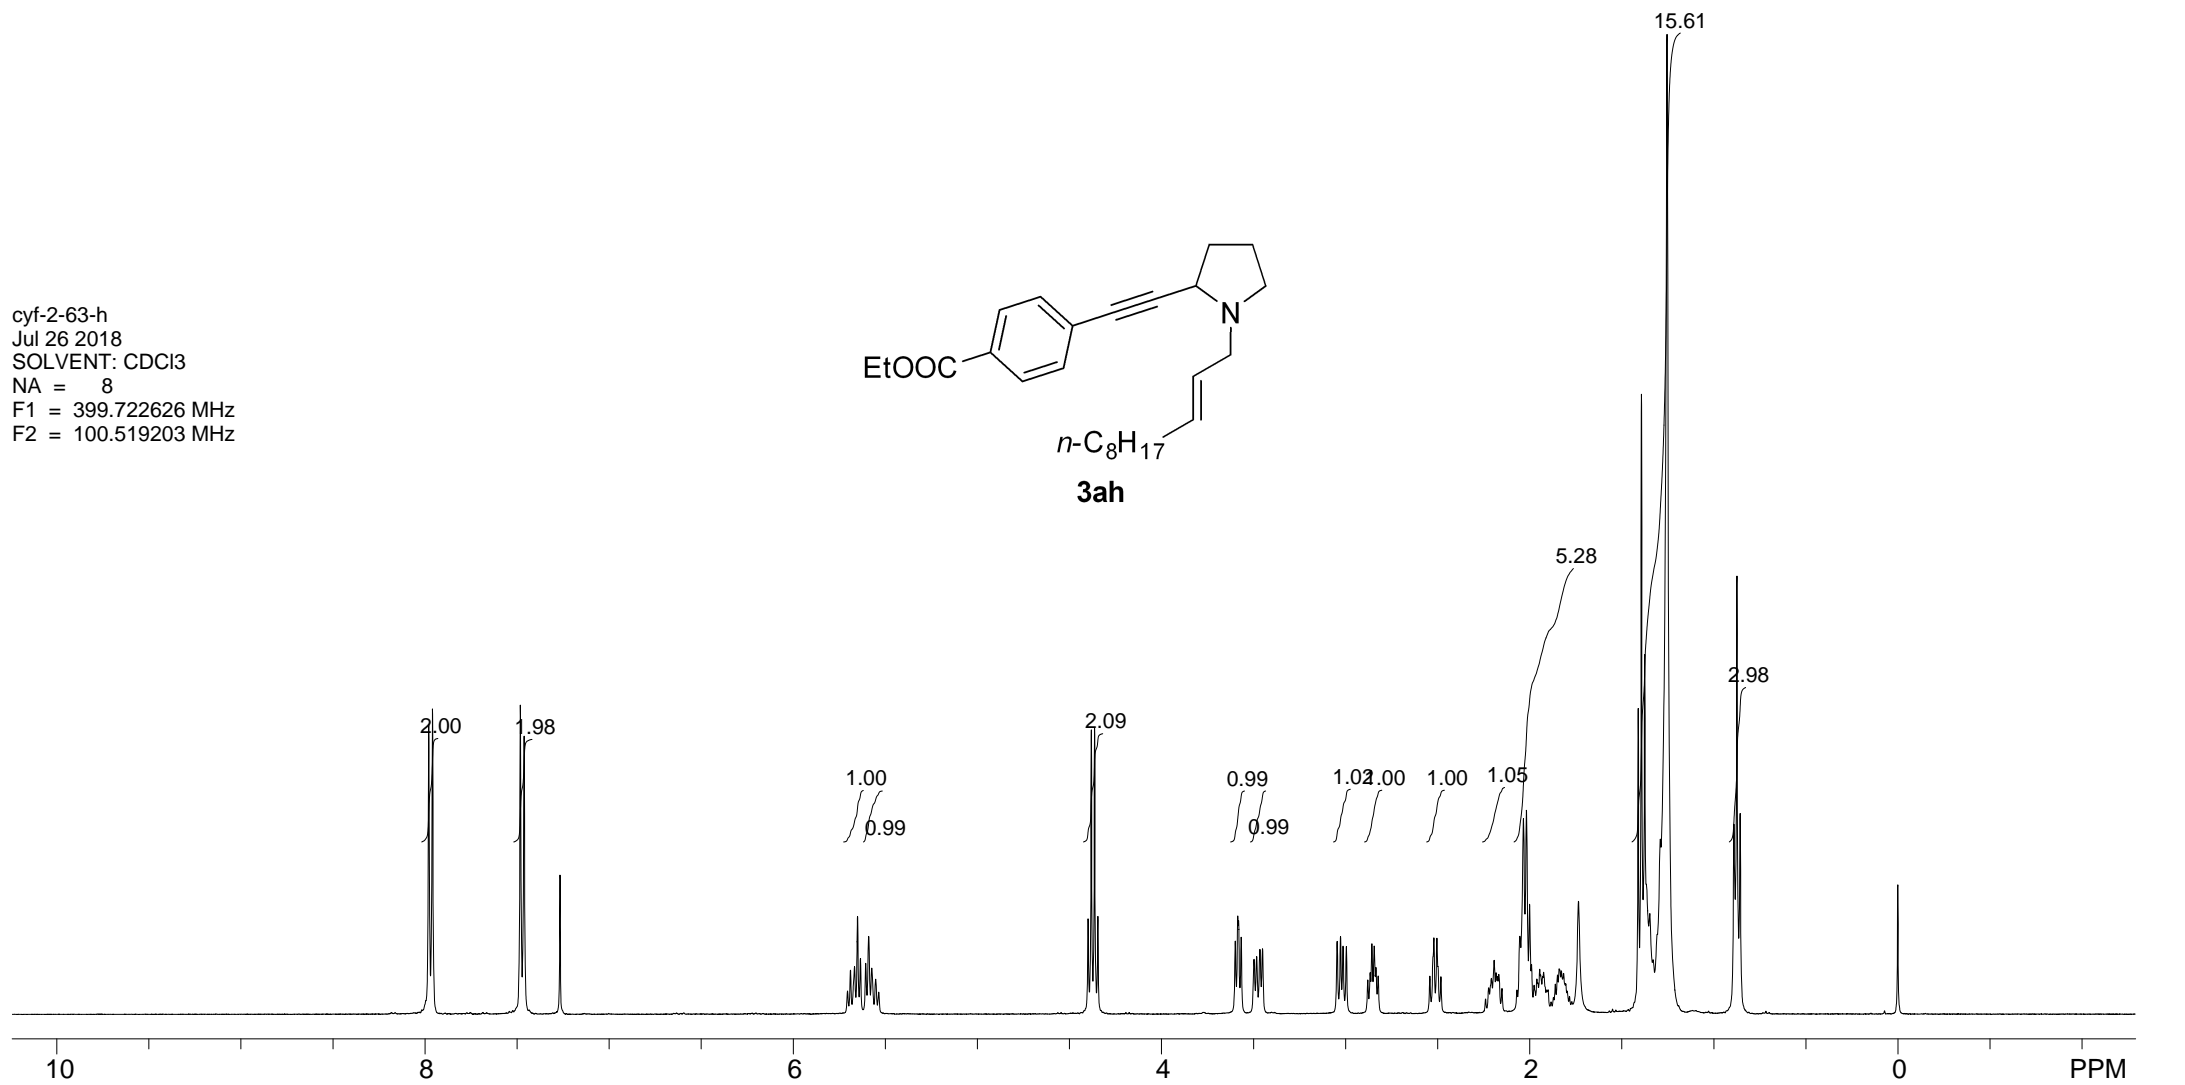

cyf-2-63-c-bruker  
Jul 26 2018  
SOLVENT: CDCl3  
NA = 76  
F1 = 100.630371 MHz  
F2 = 1.000000 MHz

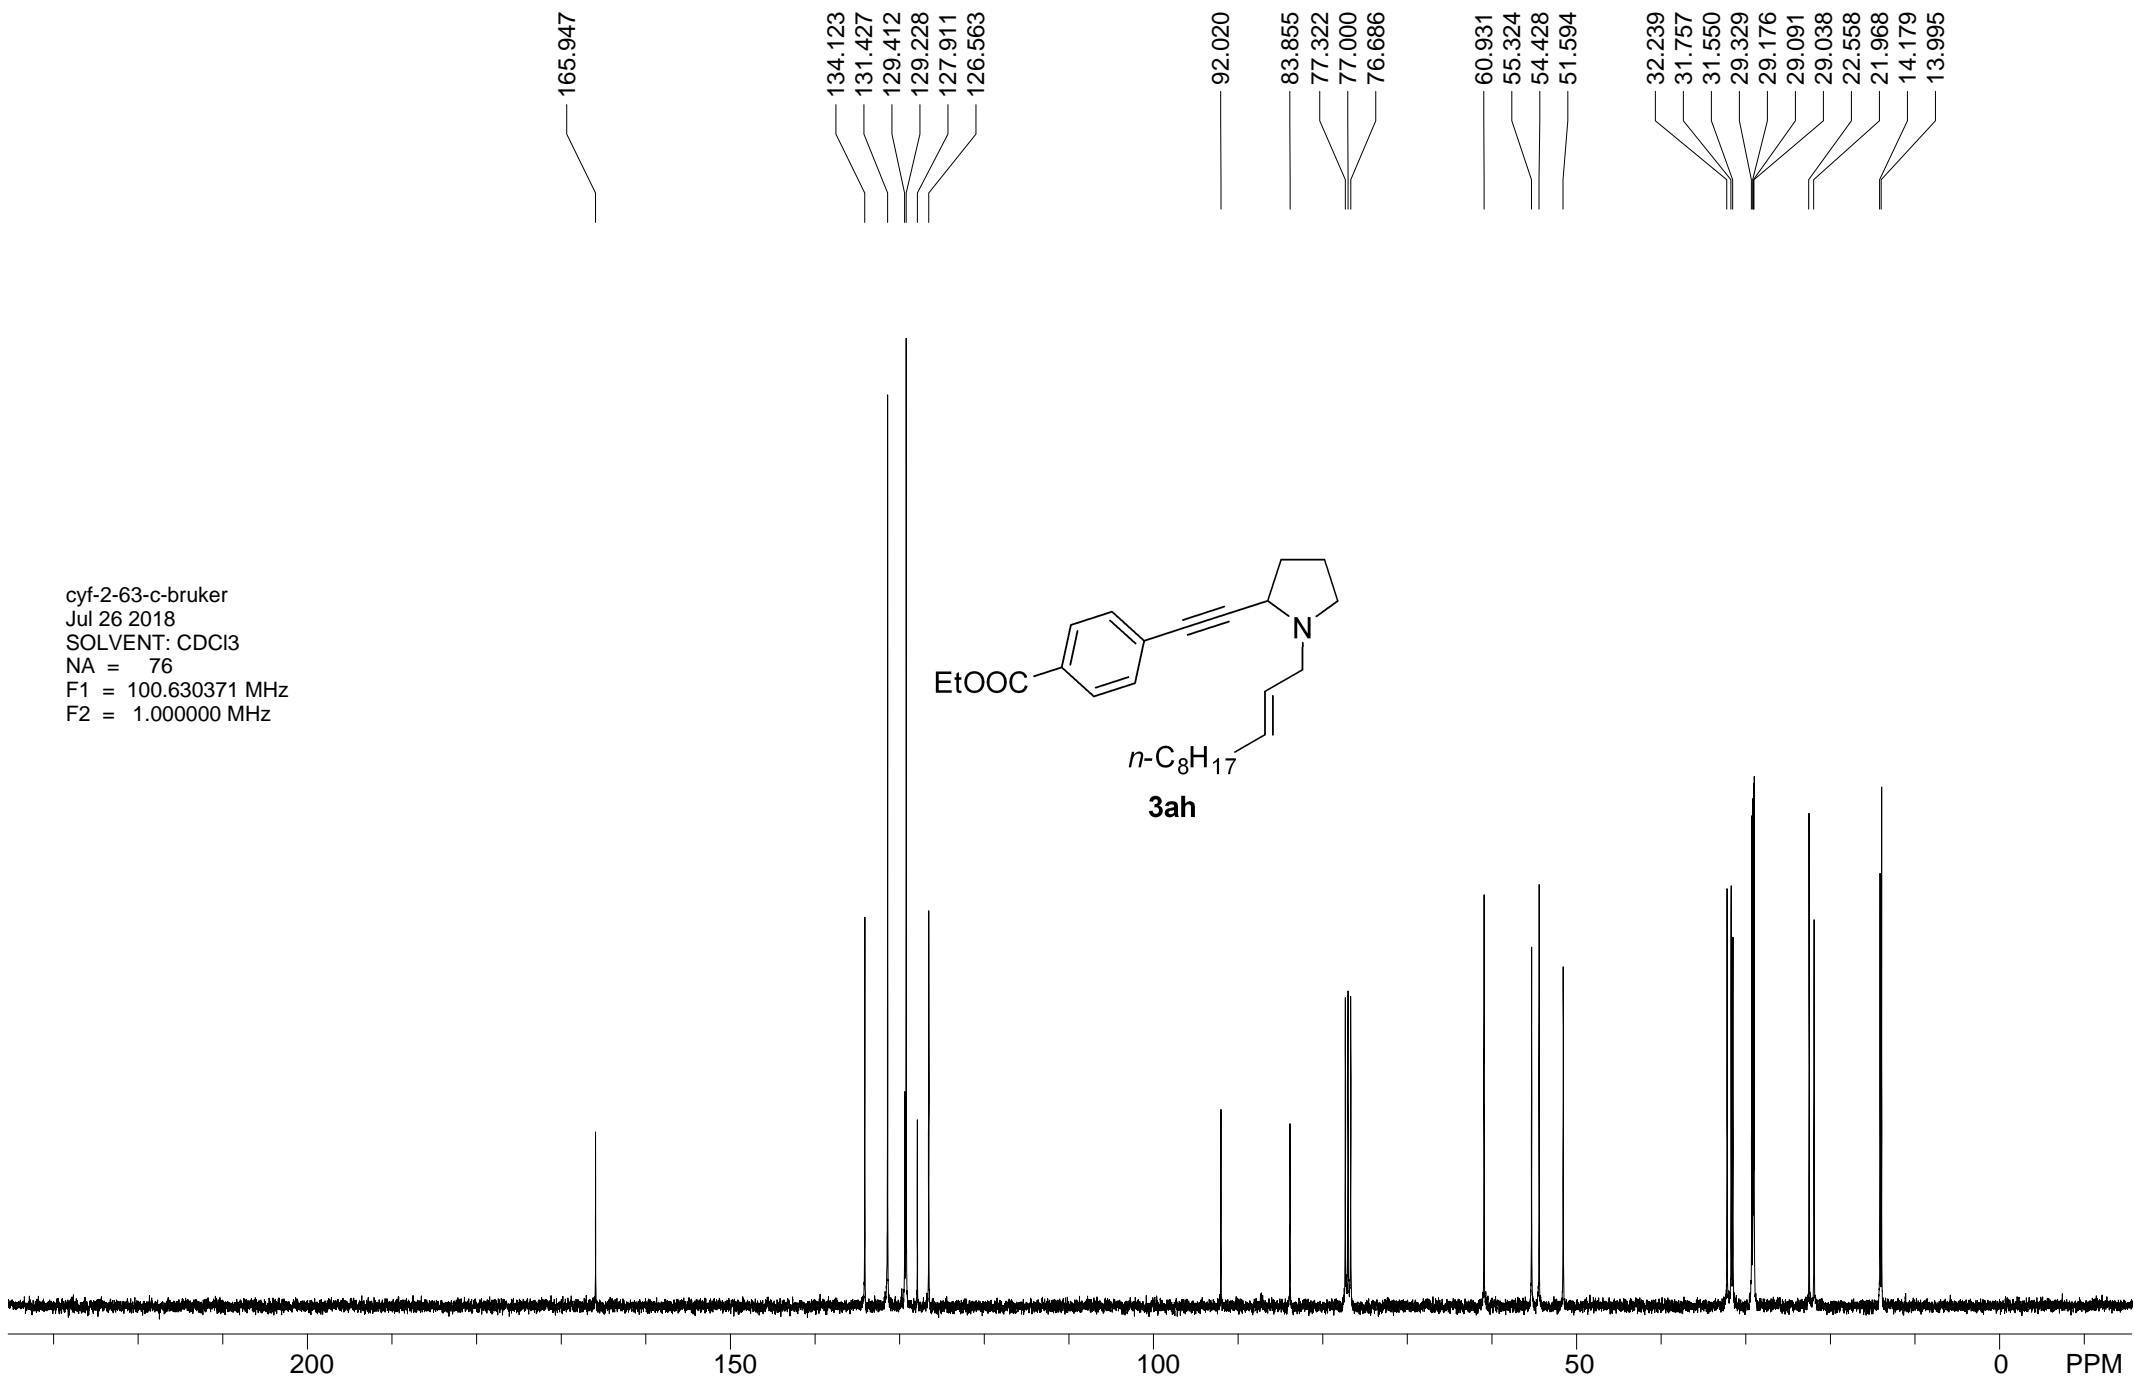

lwl-8-58H-400M  
Mar 29 2016  
SOLVENT: CDCl3  
NA = 12  
F1 = 400.031677 MHz  
F2 = 100.596855 MHz

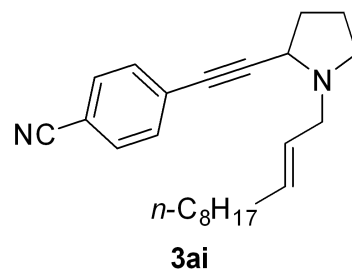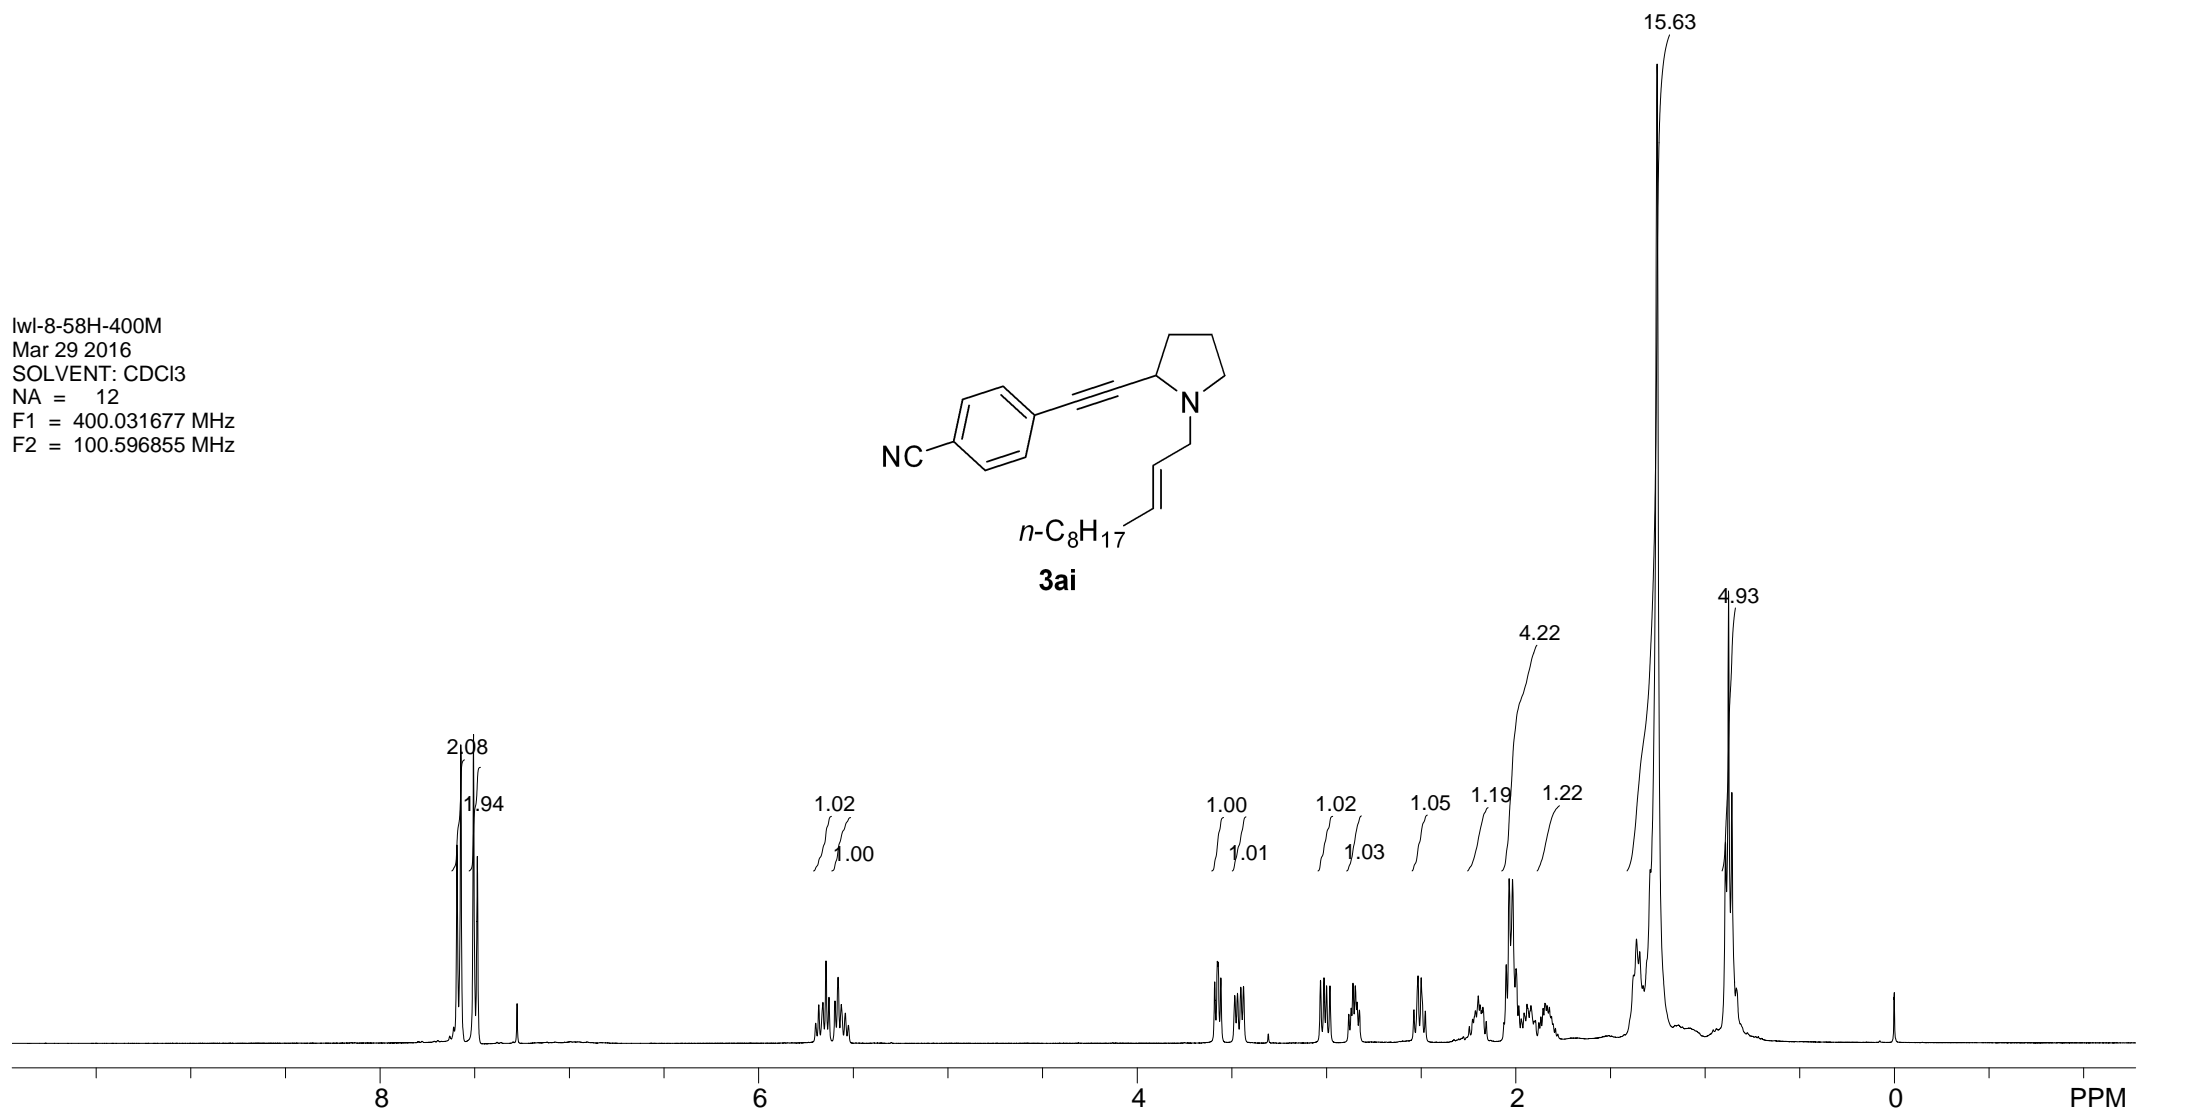

lwl-8-58C-400M  
Mar 29 2016  
SOLVENT: CDCl3  
NA = 60  
F1 = 100.597885 MHz  
F2 = 400.030792 MHz

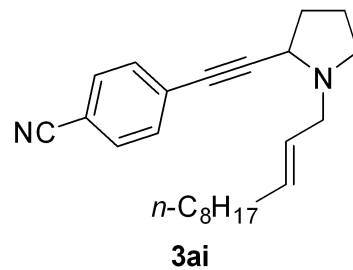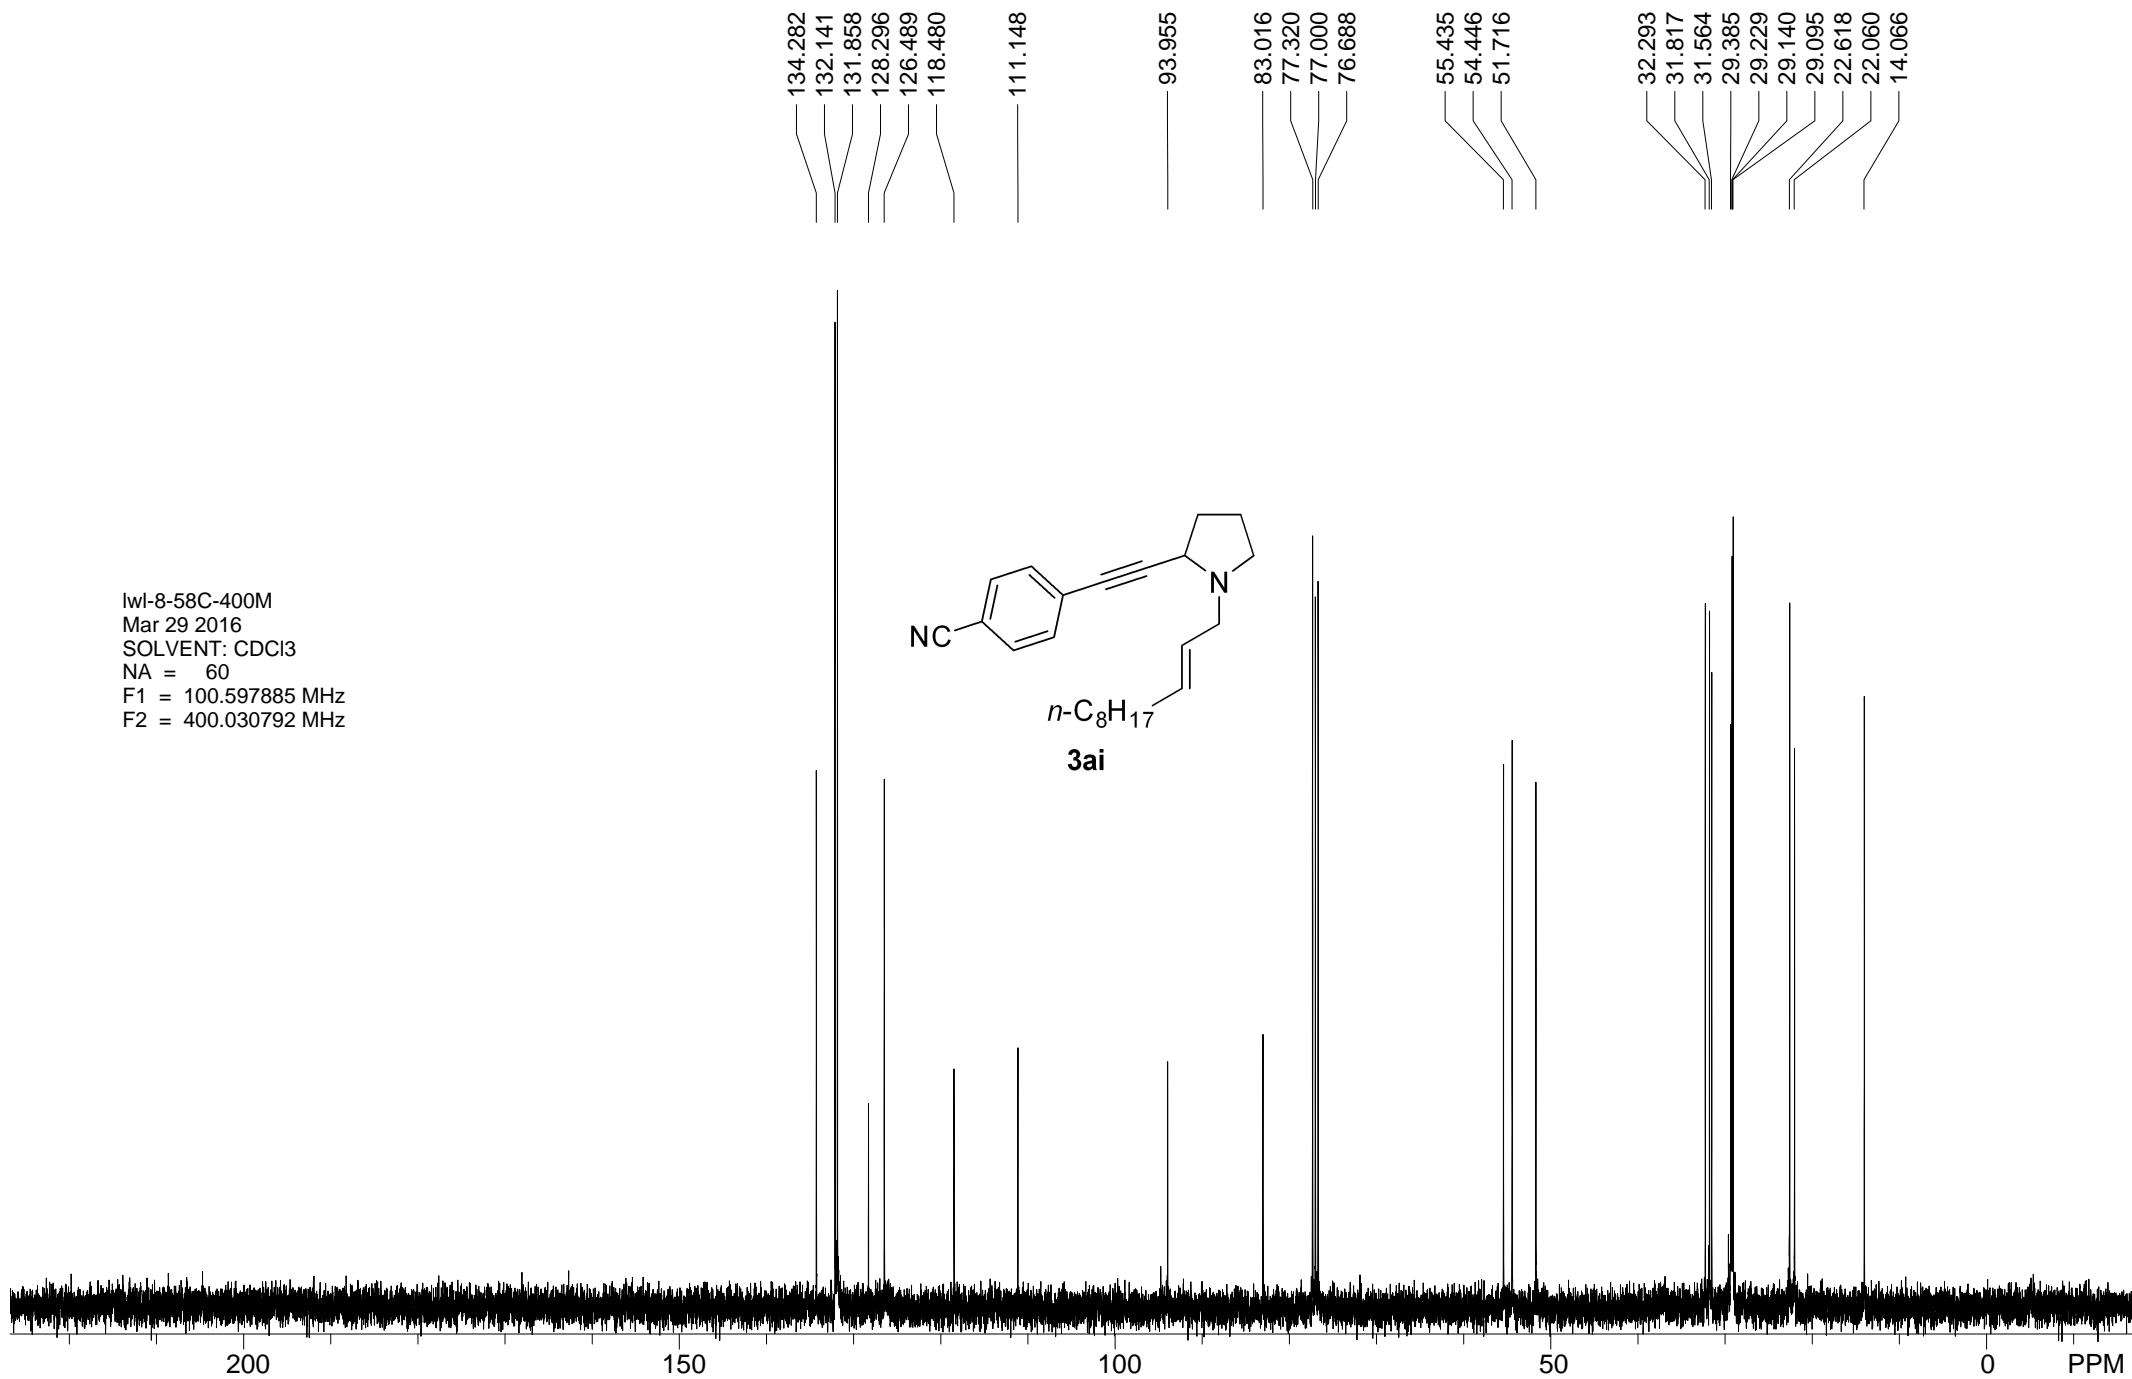

lwl-9-68H-400M  
Jun 23 2017  
SOLVENT: CDCl3  
NA = 12  
F1 = 399.722809 MHz  
F2 = 100.519203 MHz

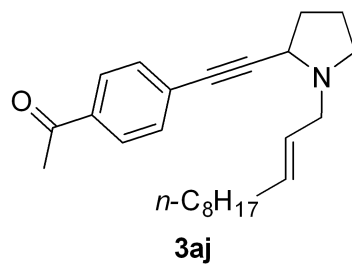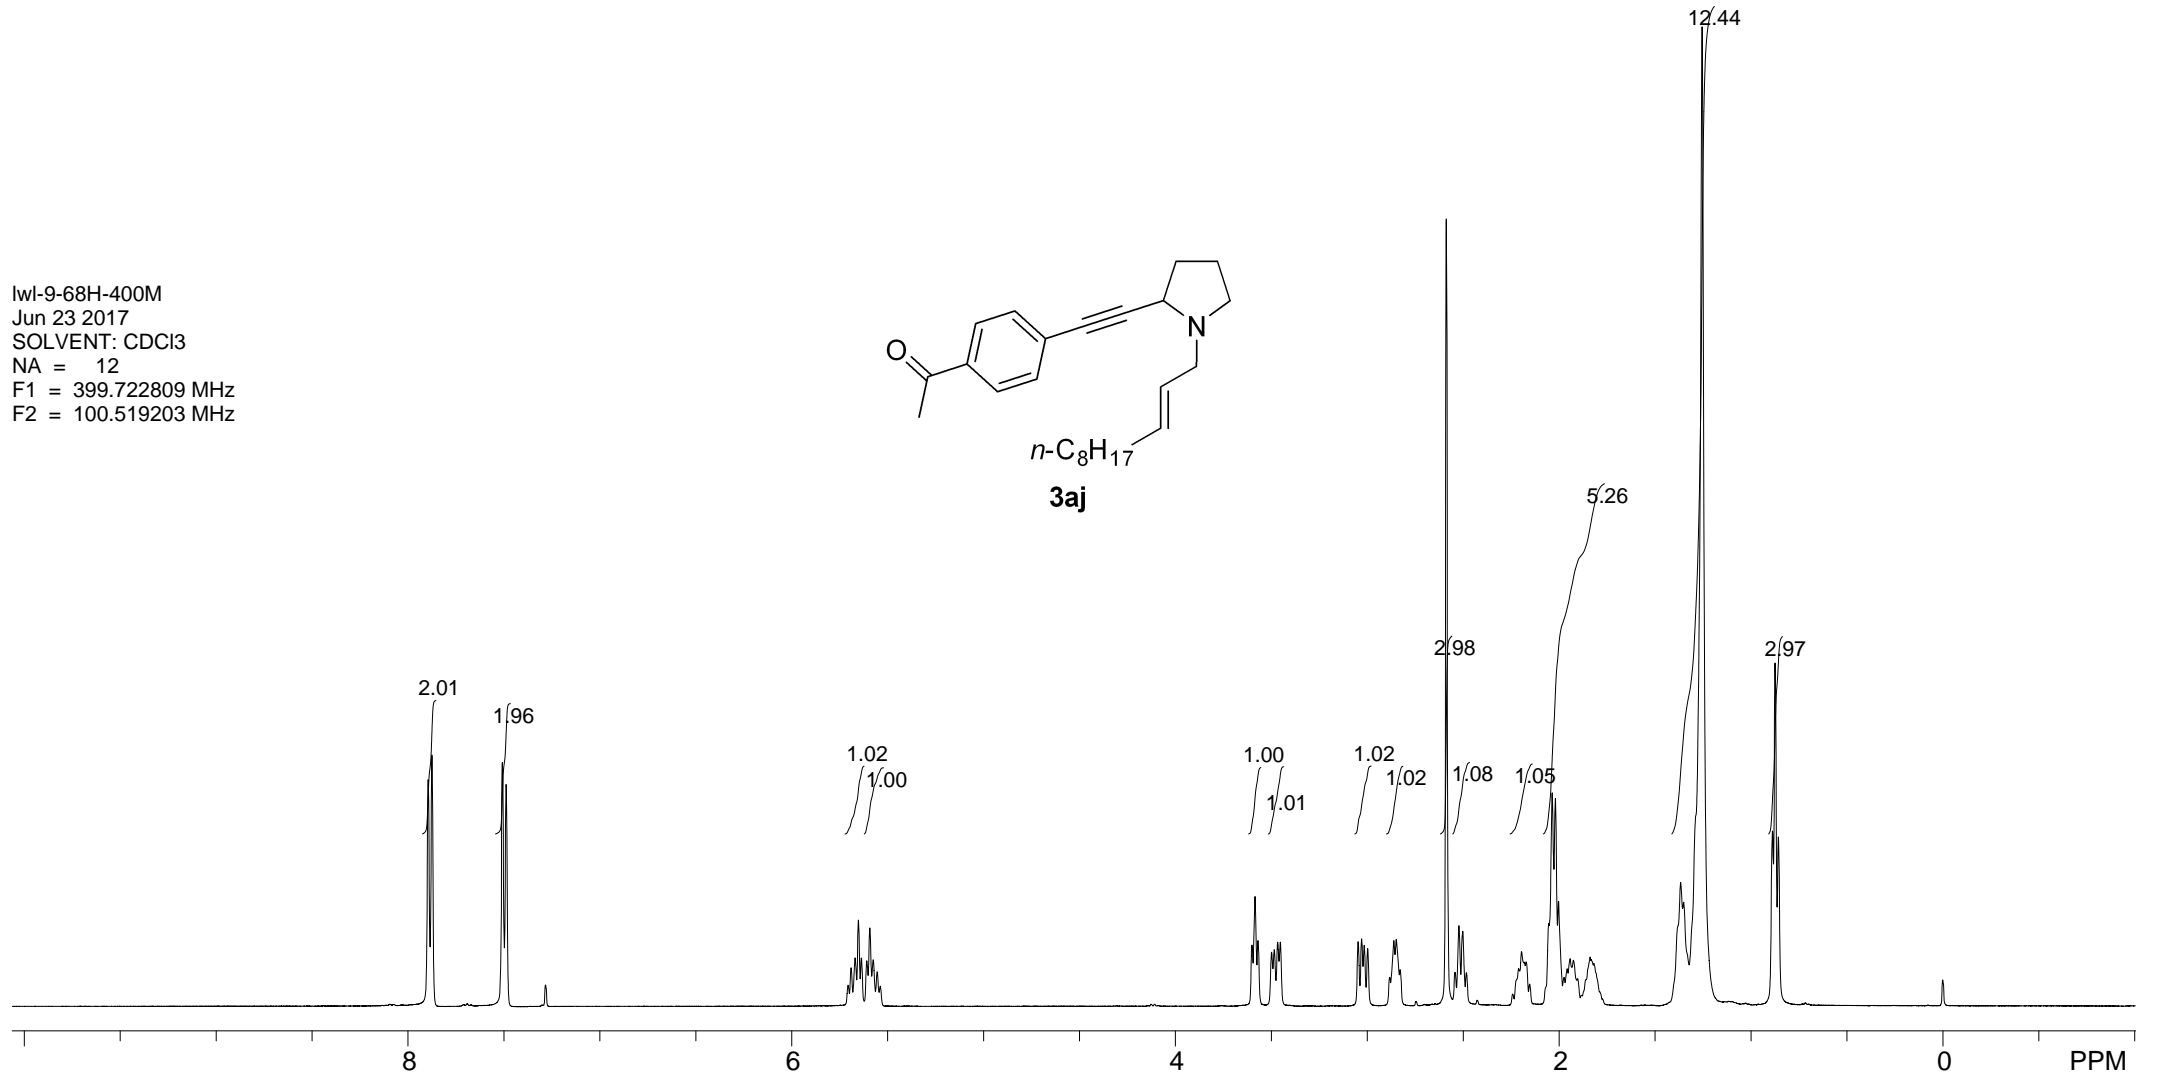

lwl-9-68C-400M  
Jun 23 2017  
SOLVENT: CDCl3  
NA = 88  
F1 = 100.520737 MHz  
F2 = 399.722015 MHz

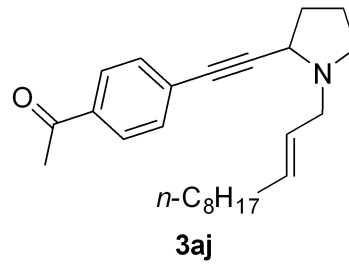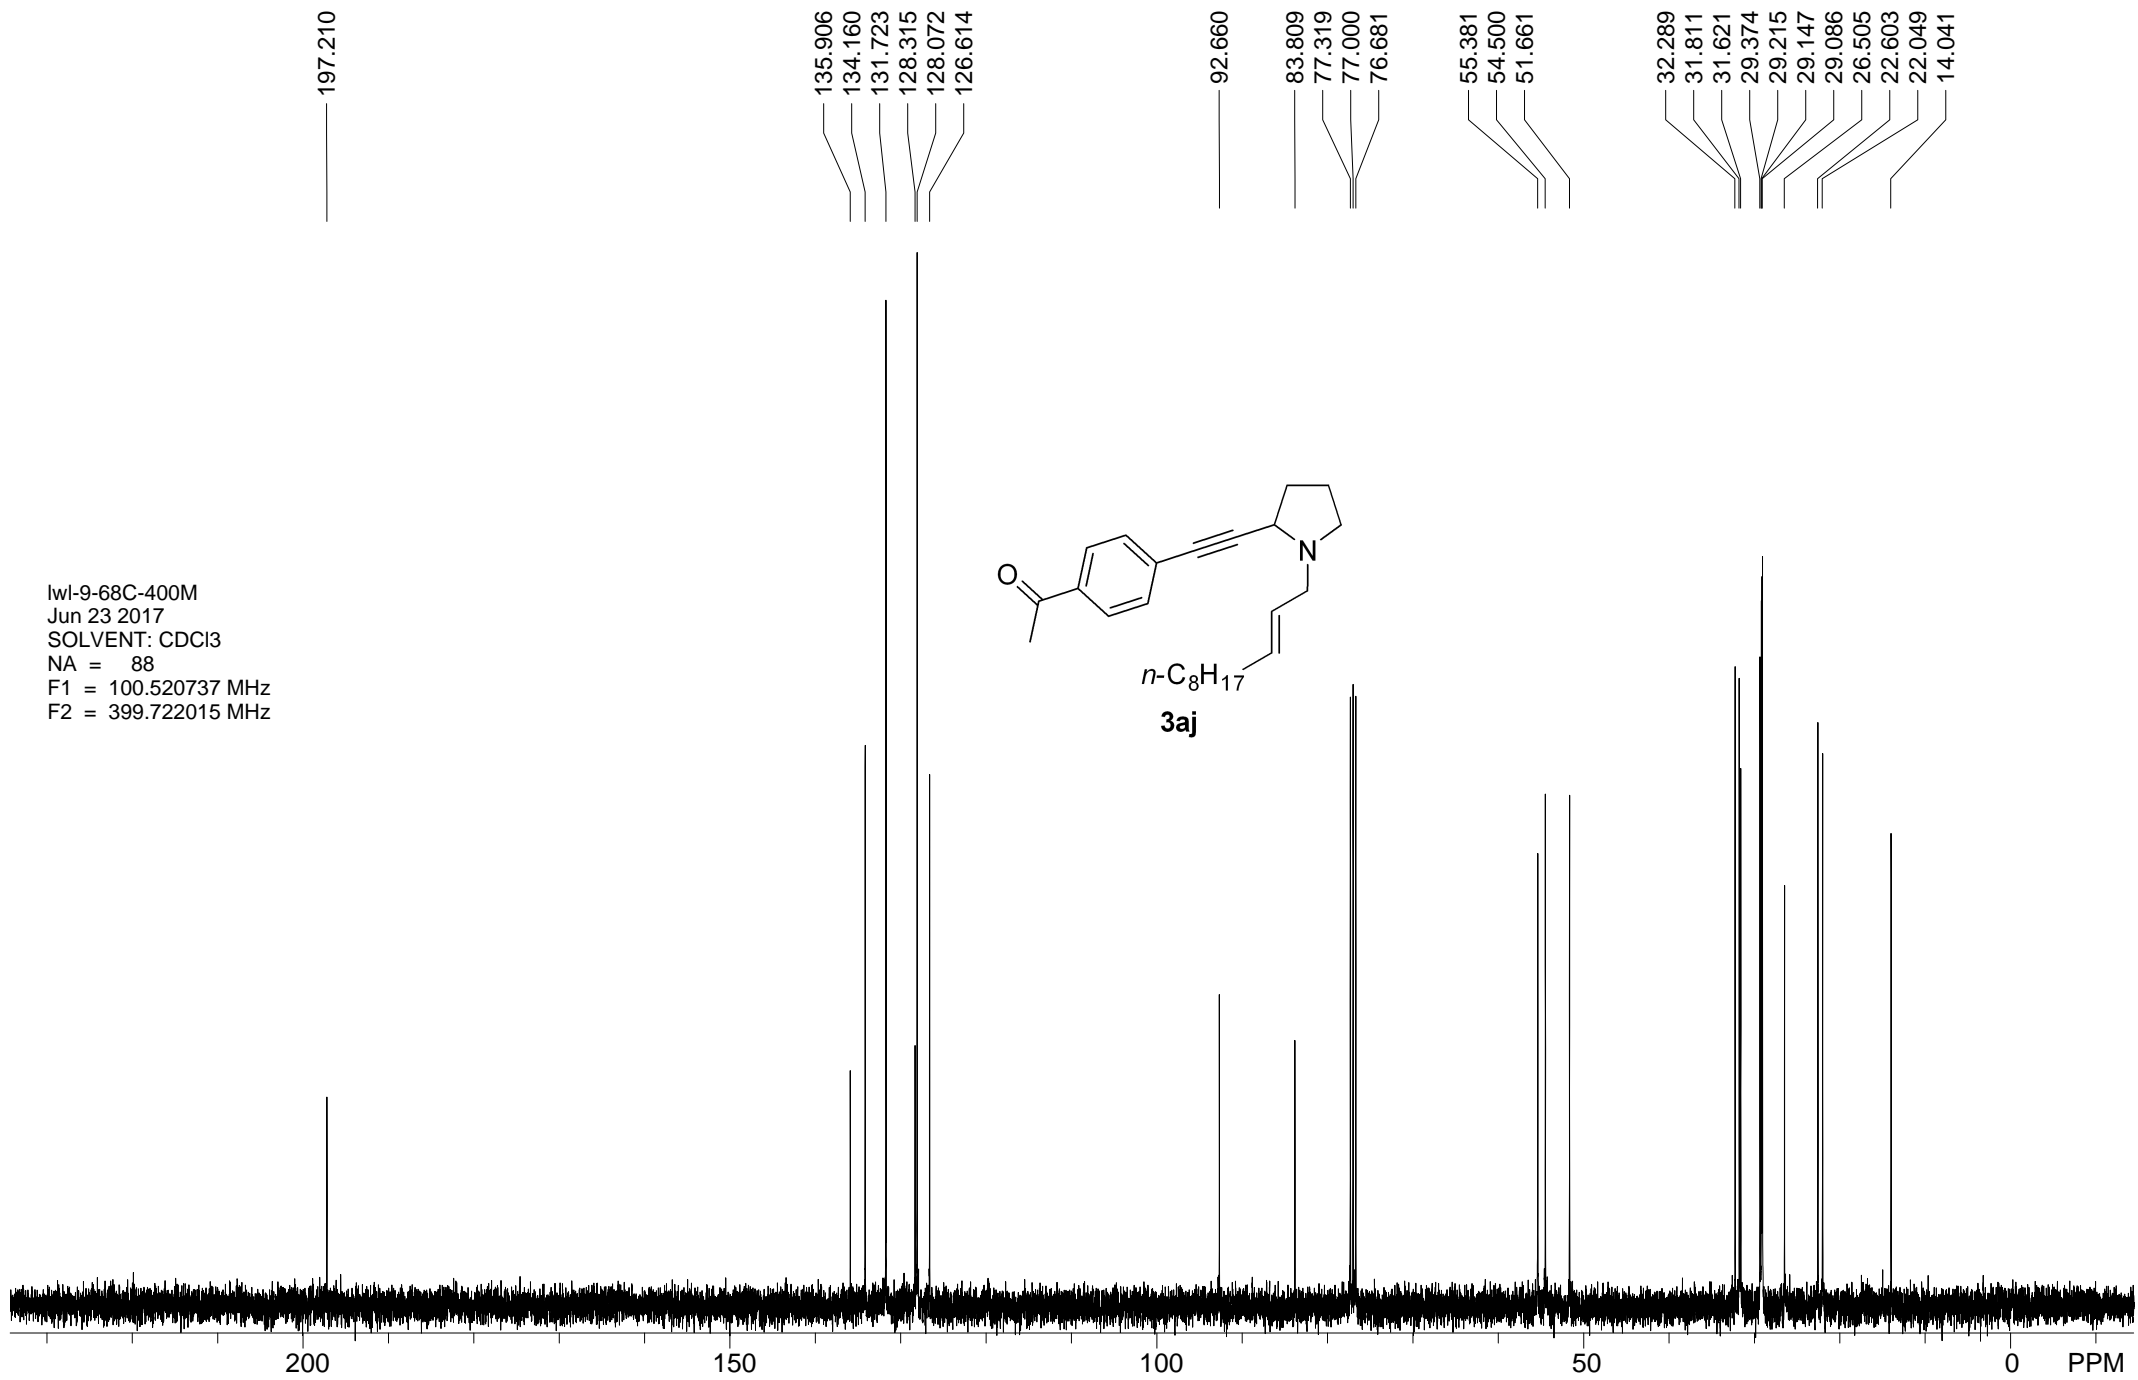

lwl-8-1H-400M  
Mar 29 2016  
SOLVENT: CDCl3  
NA = 8  
F1 = 399.722809 MHz  
F2 = 100.519203 MHz

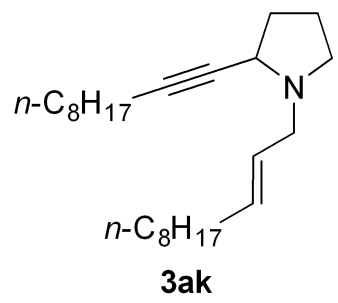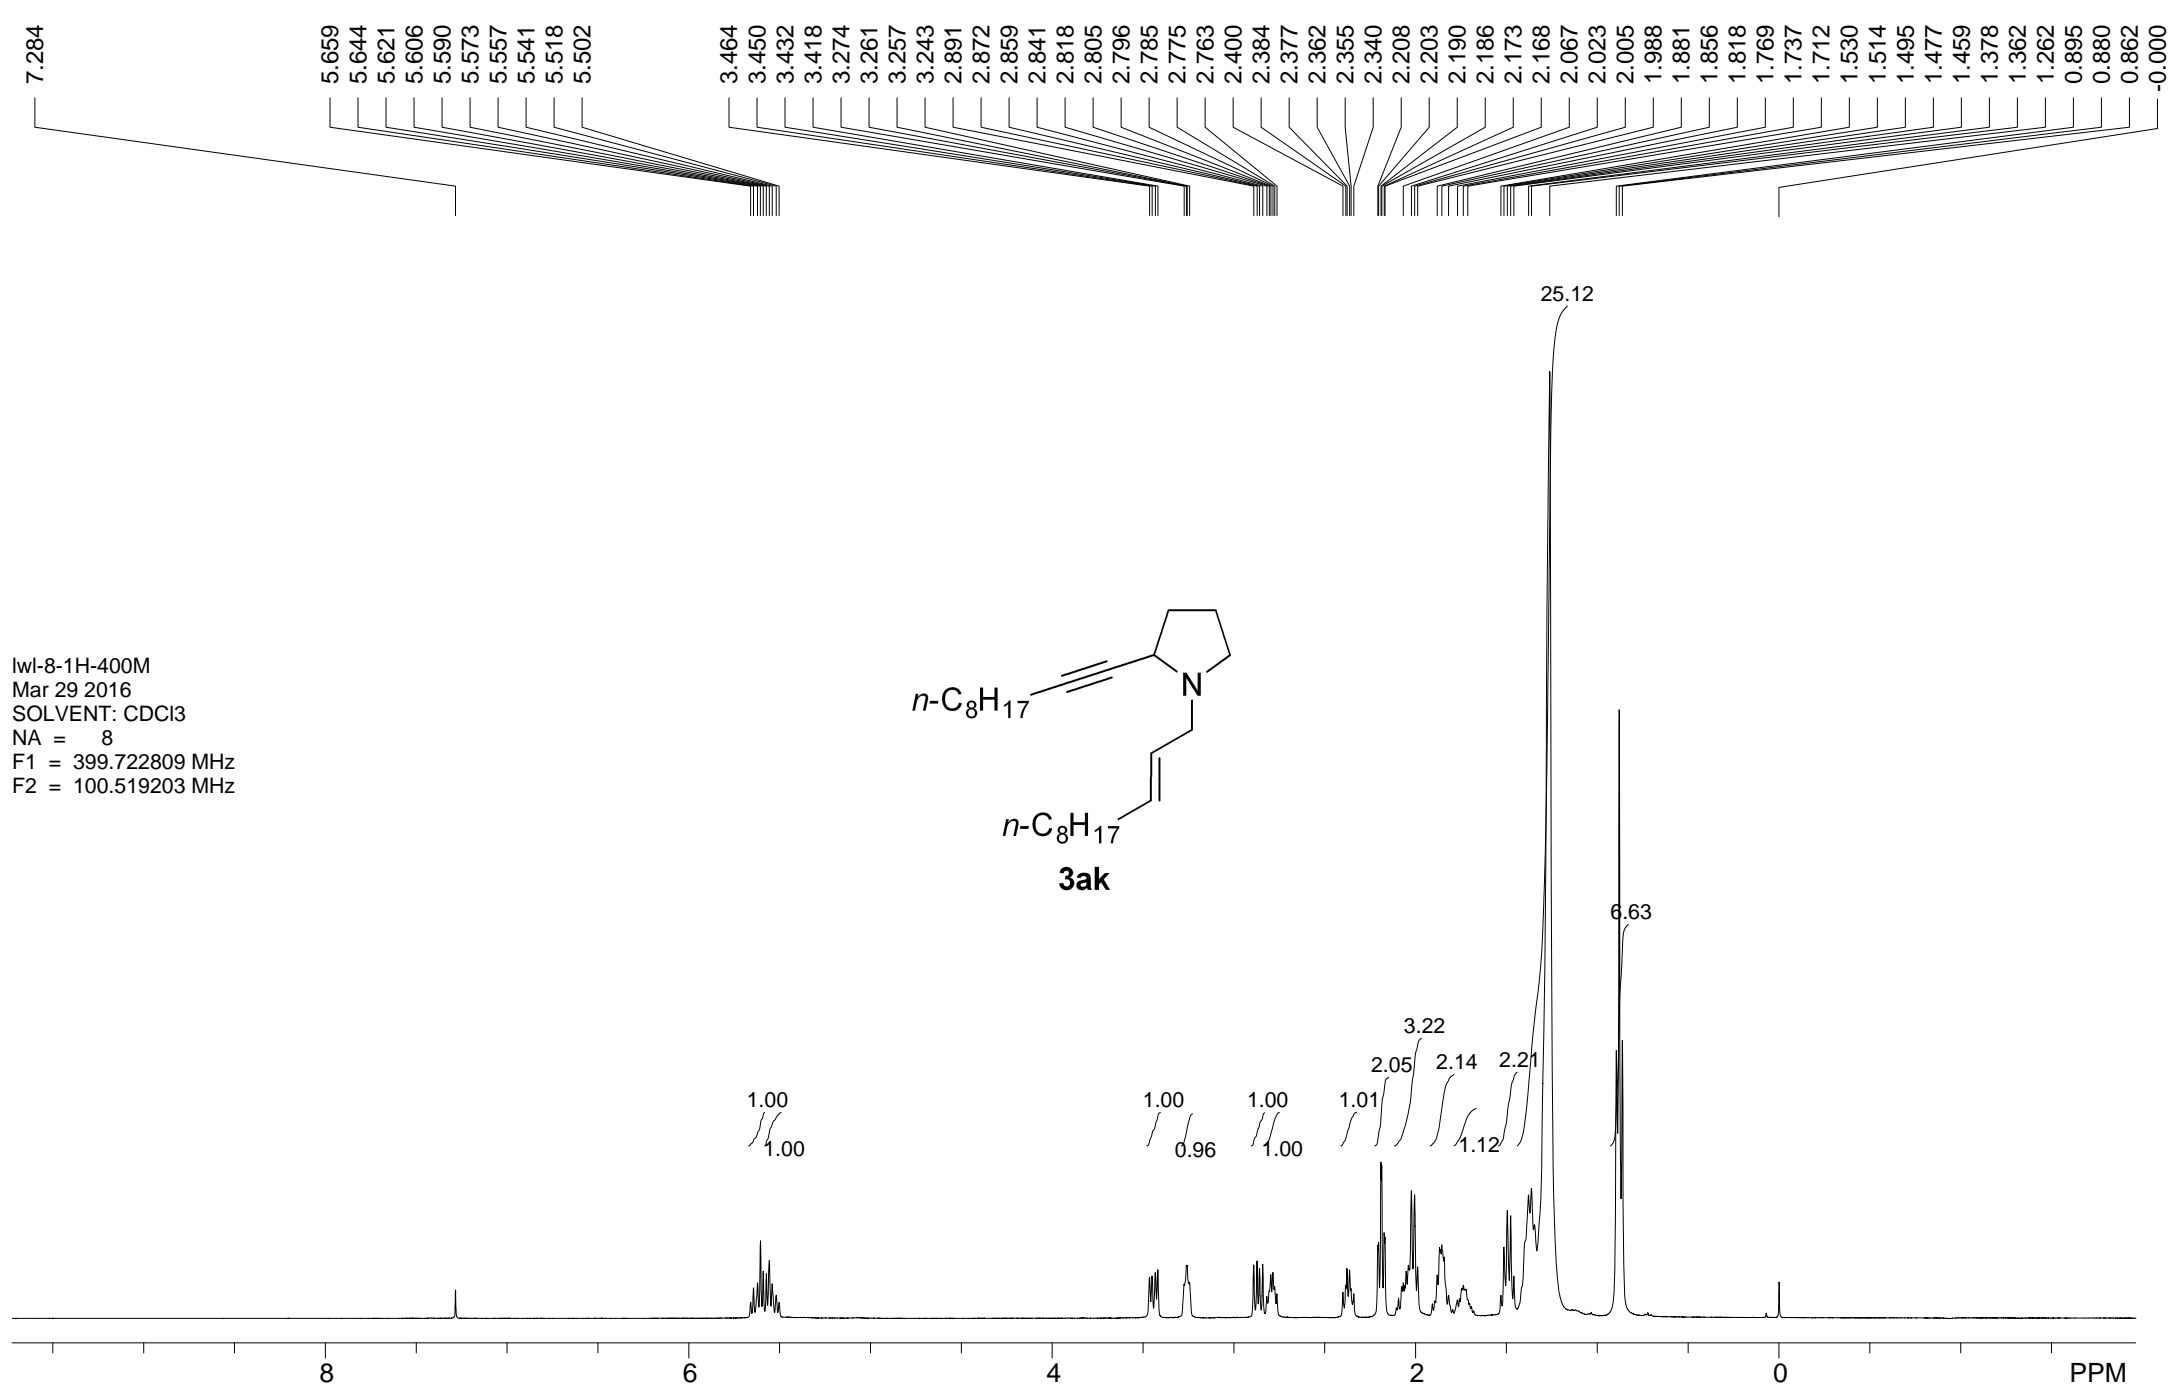



lwl-8-1C-400M  
Mar 29 2016  
SOLVENT: CDCl3  
NA = 60  
F1 = 100.520737 MHz  
F2 = 399.722015 MHz

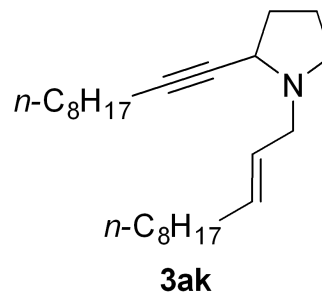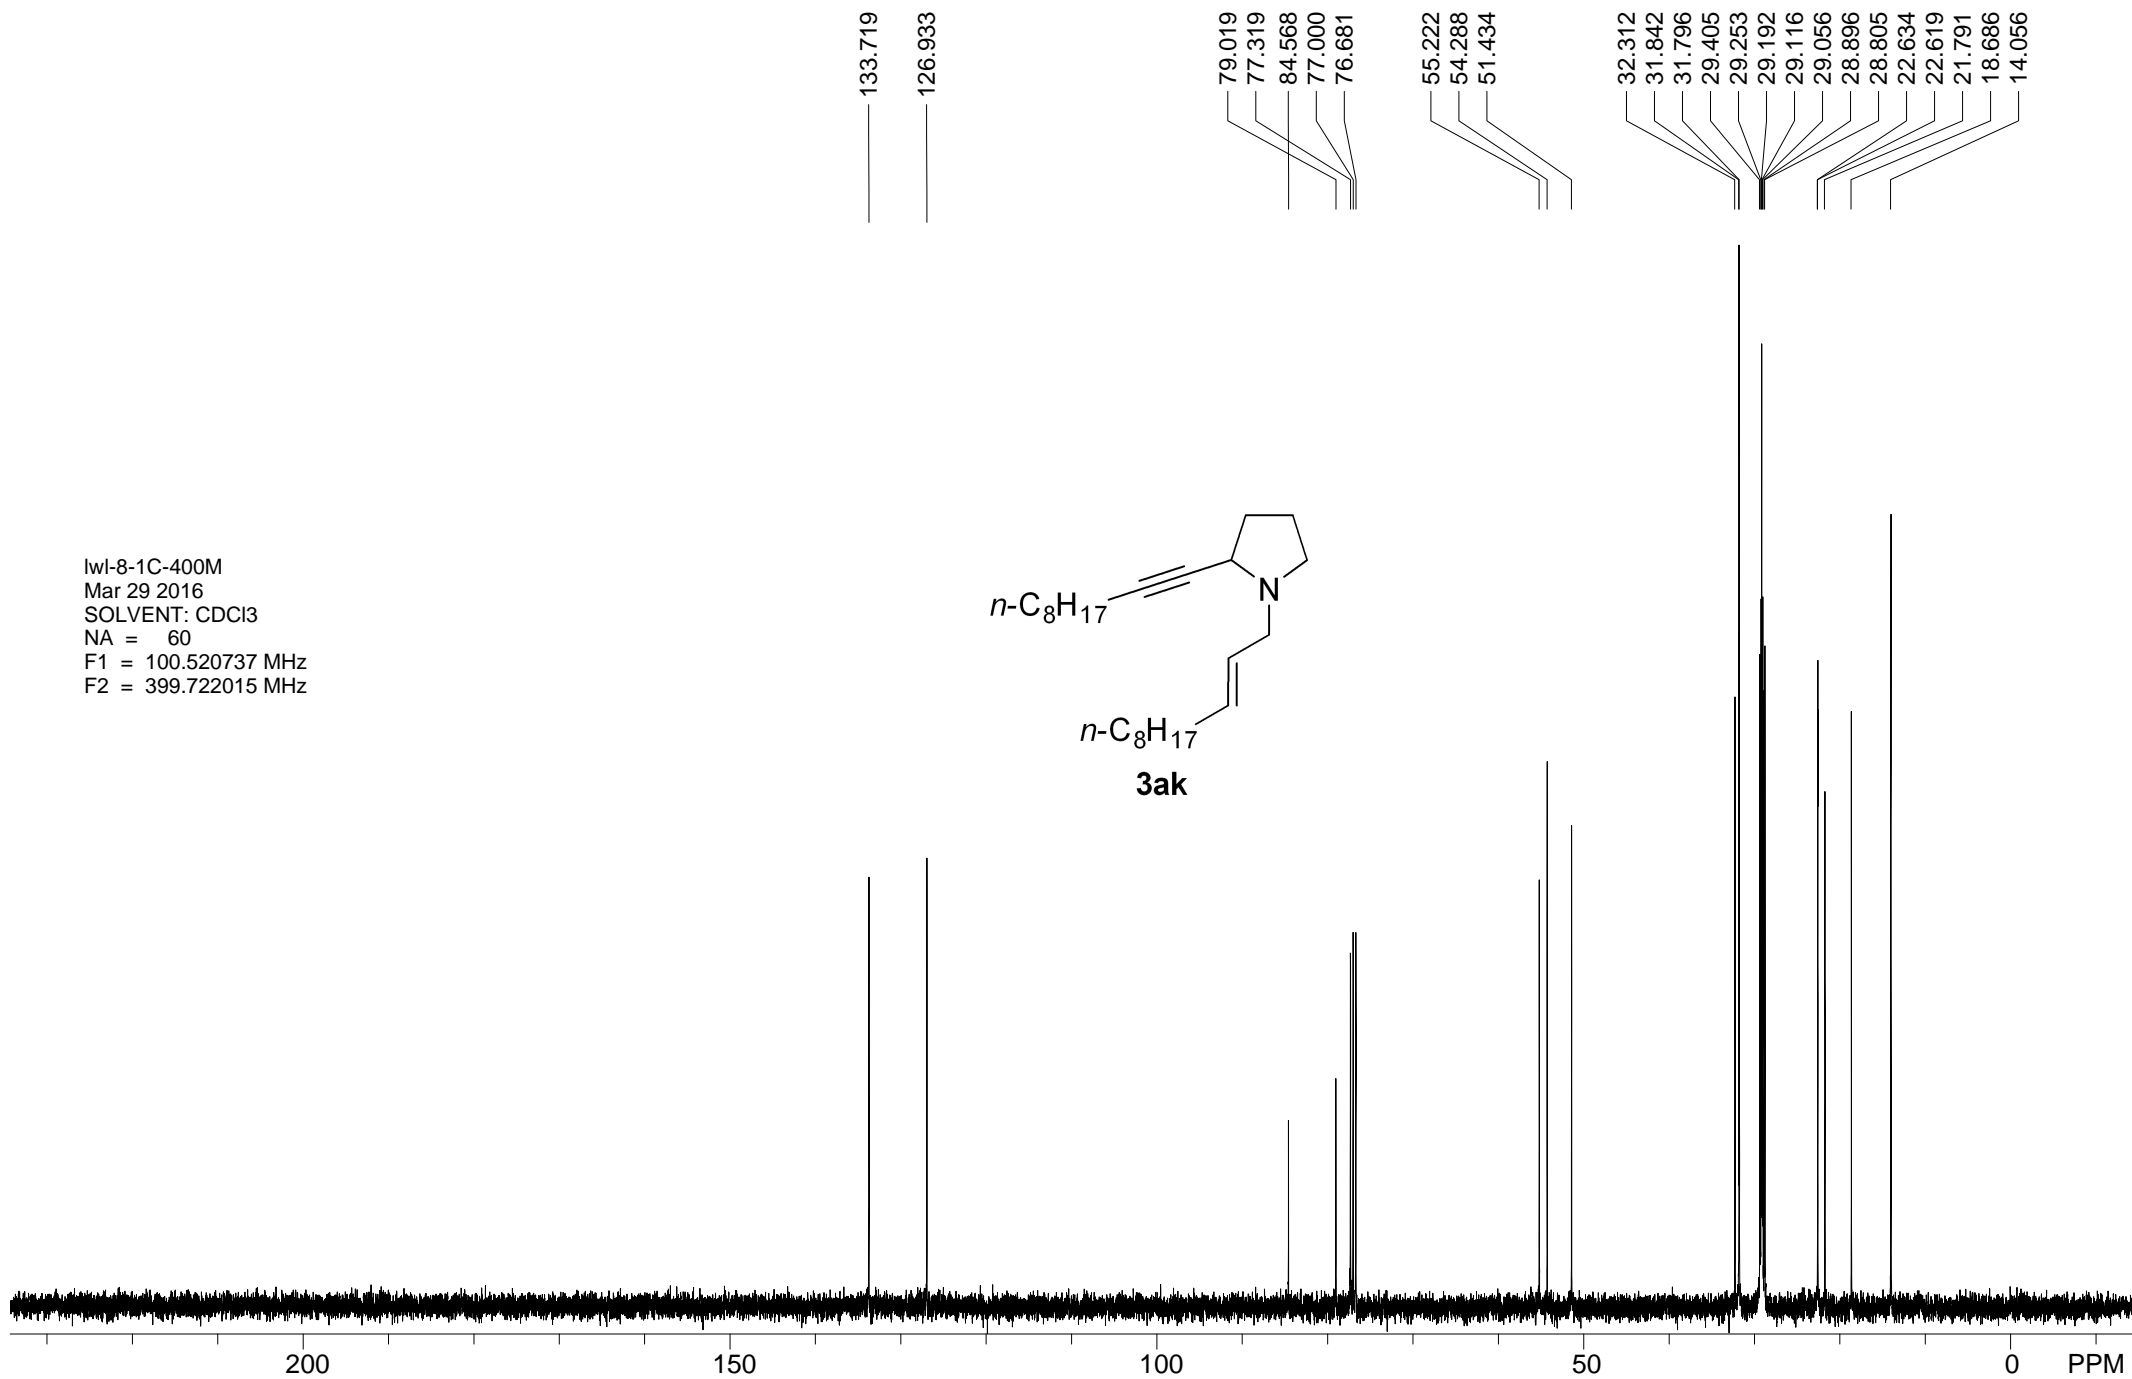

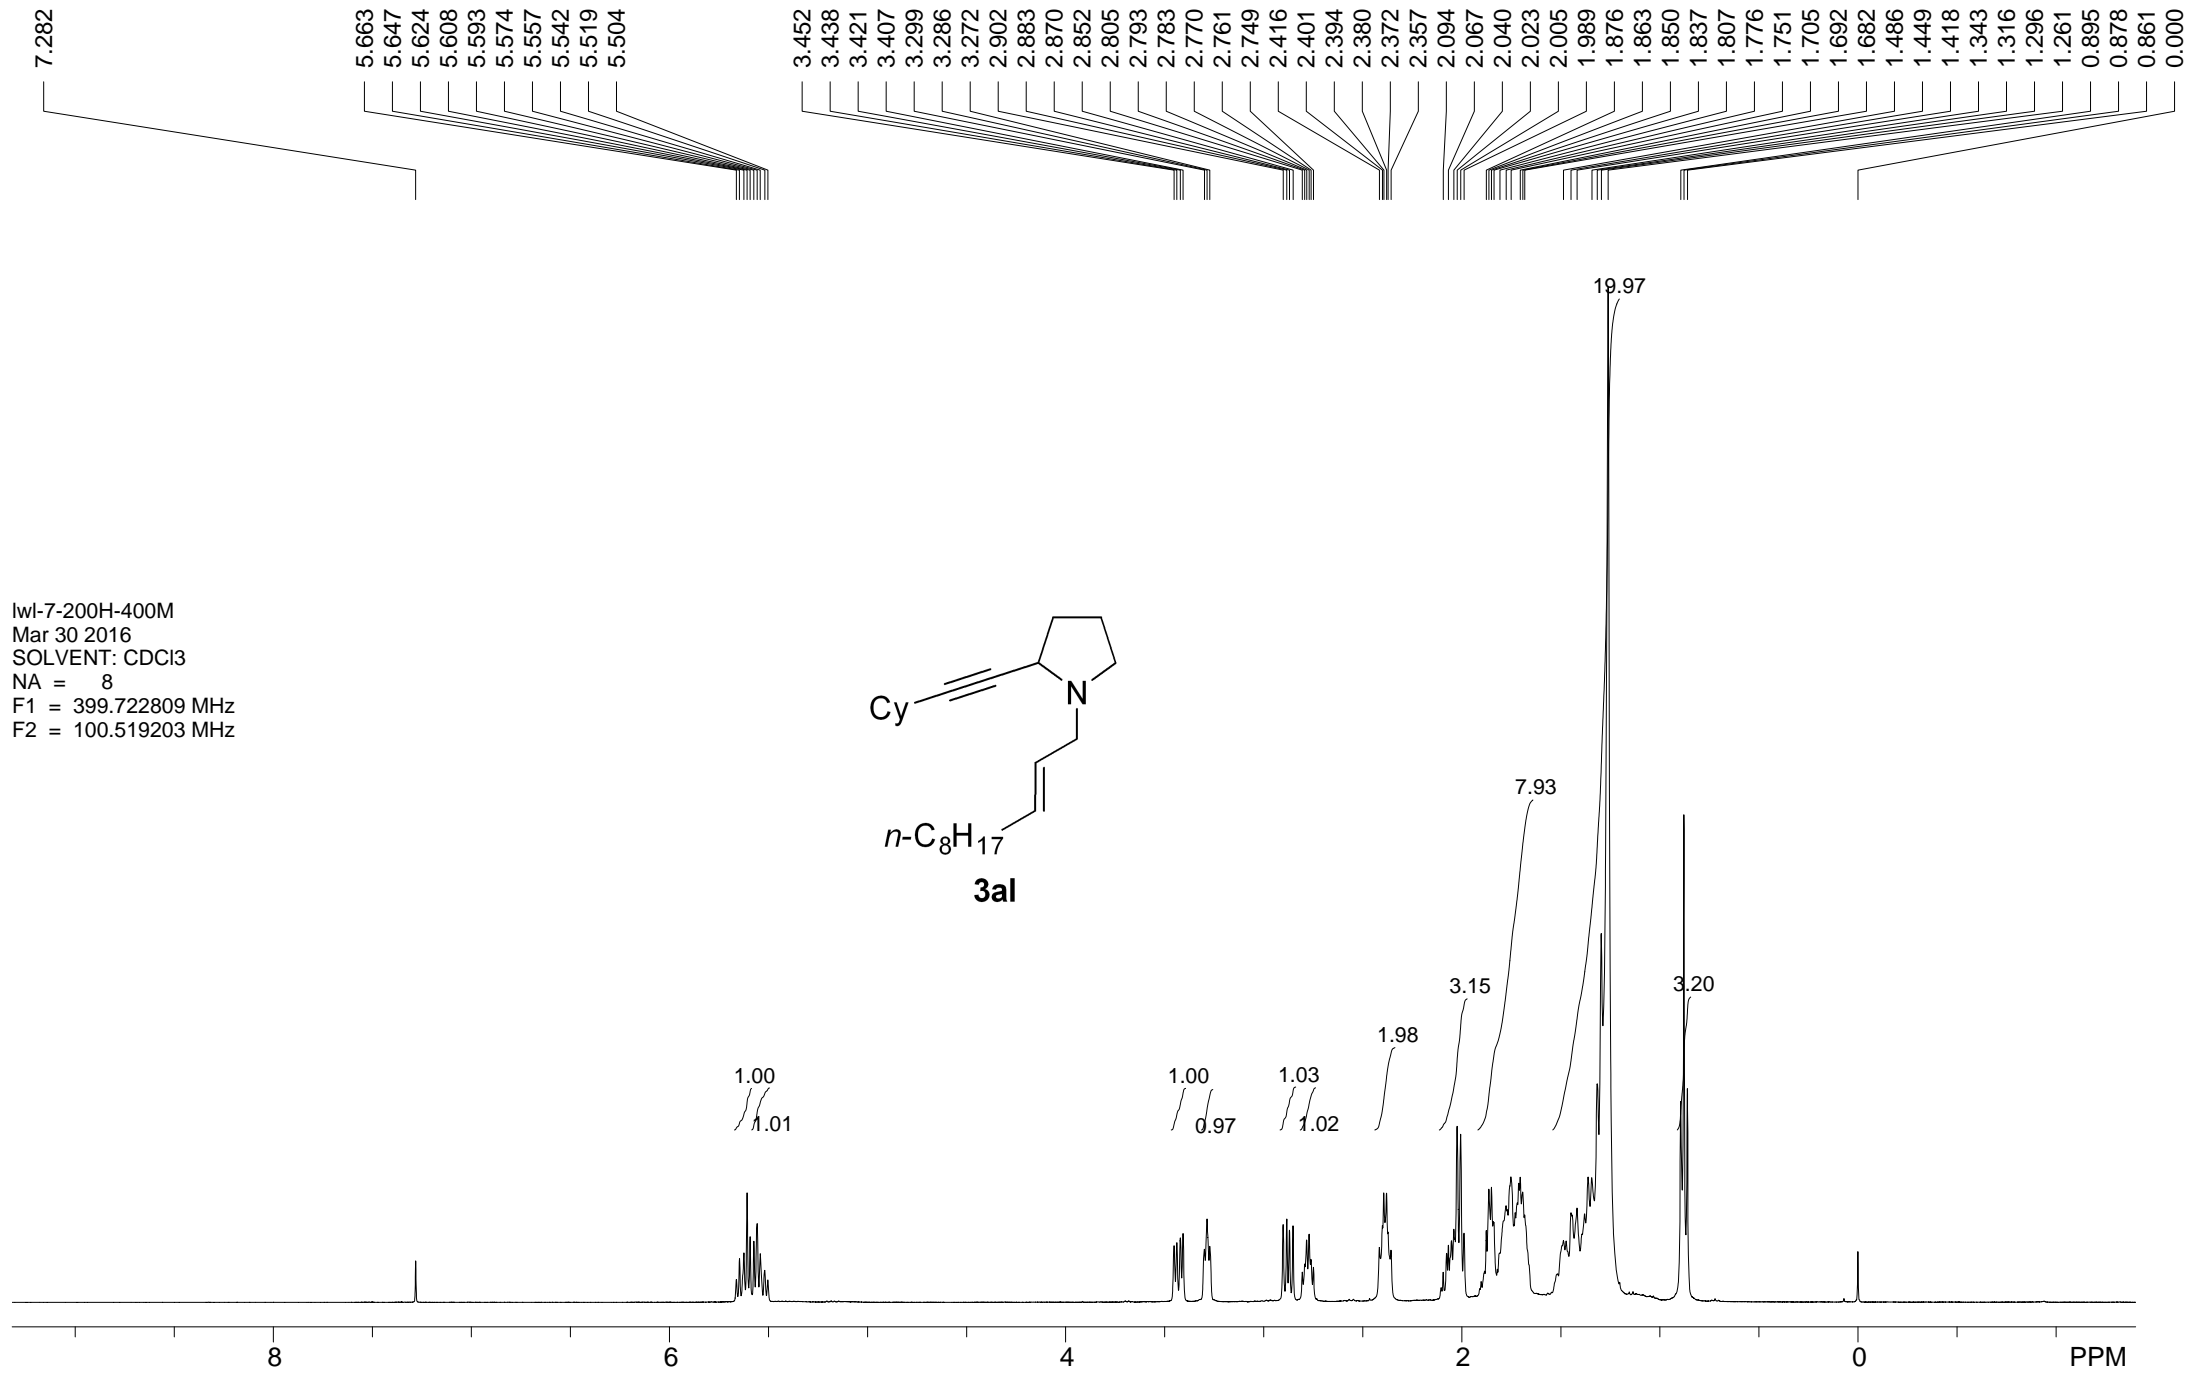

lwl-7-200C-400M  
Mar 30 2016  
SOLVENT: CDCl3  
NA = 80  
F1 = 100.520737 MHz  
F2 = 399.722015 MHz

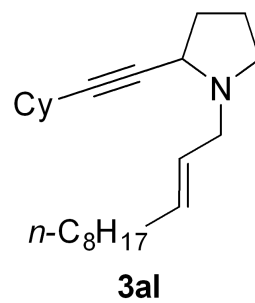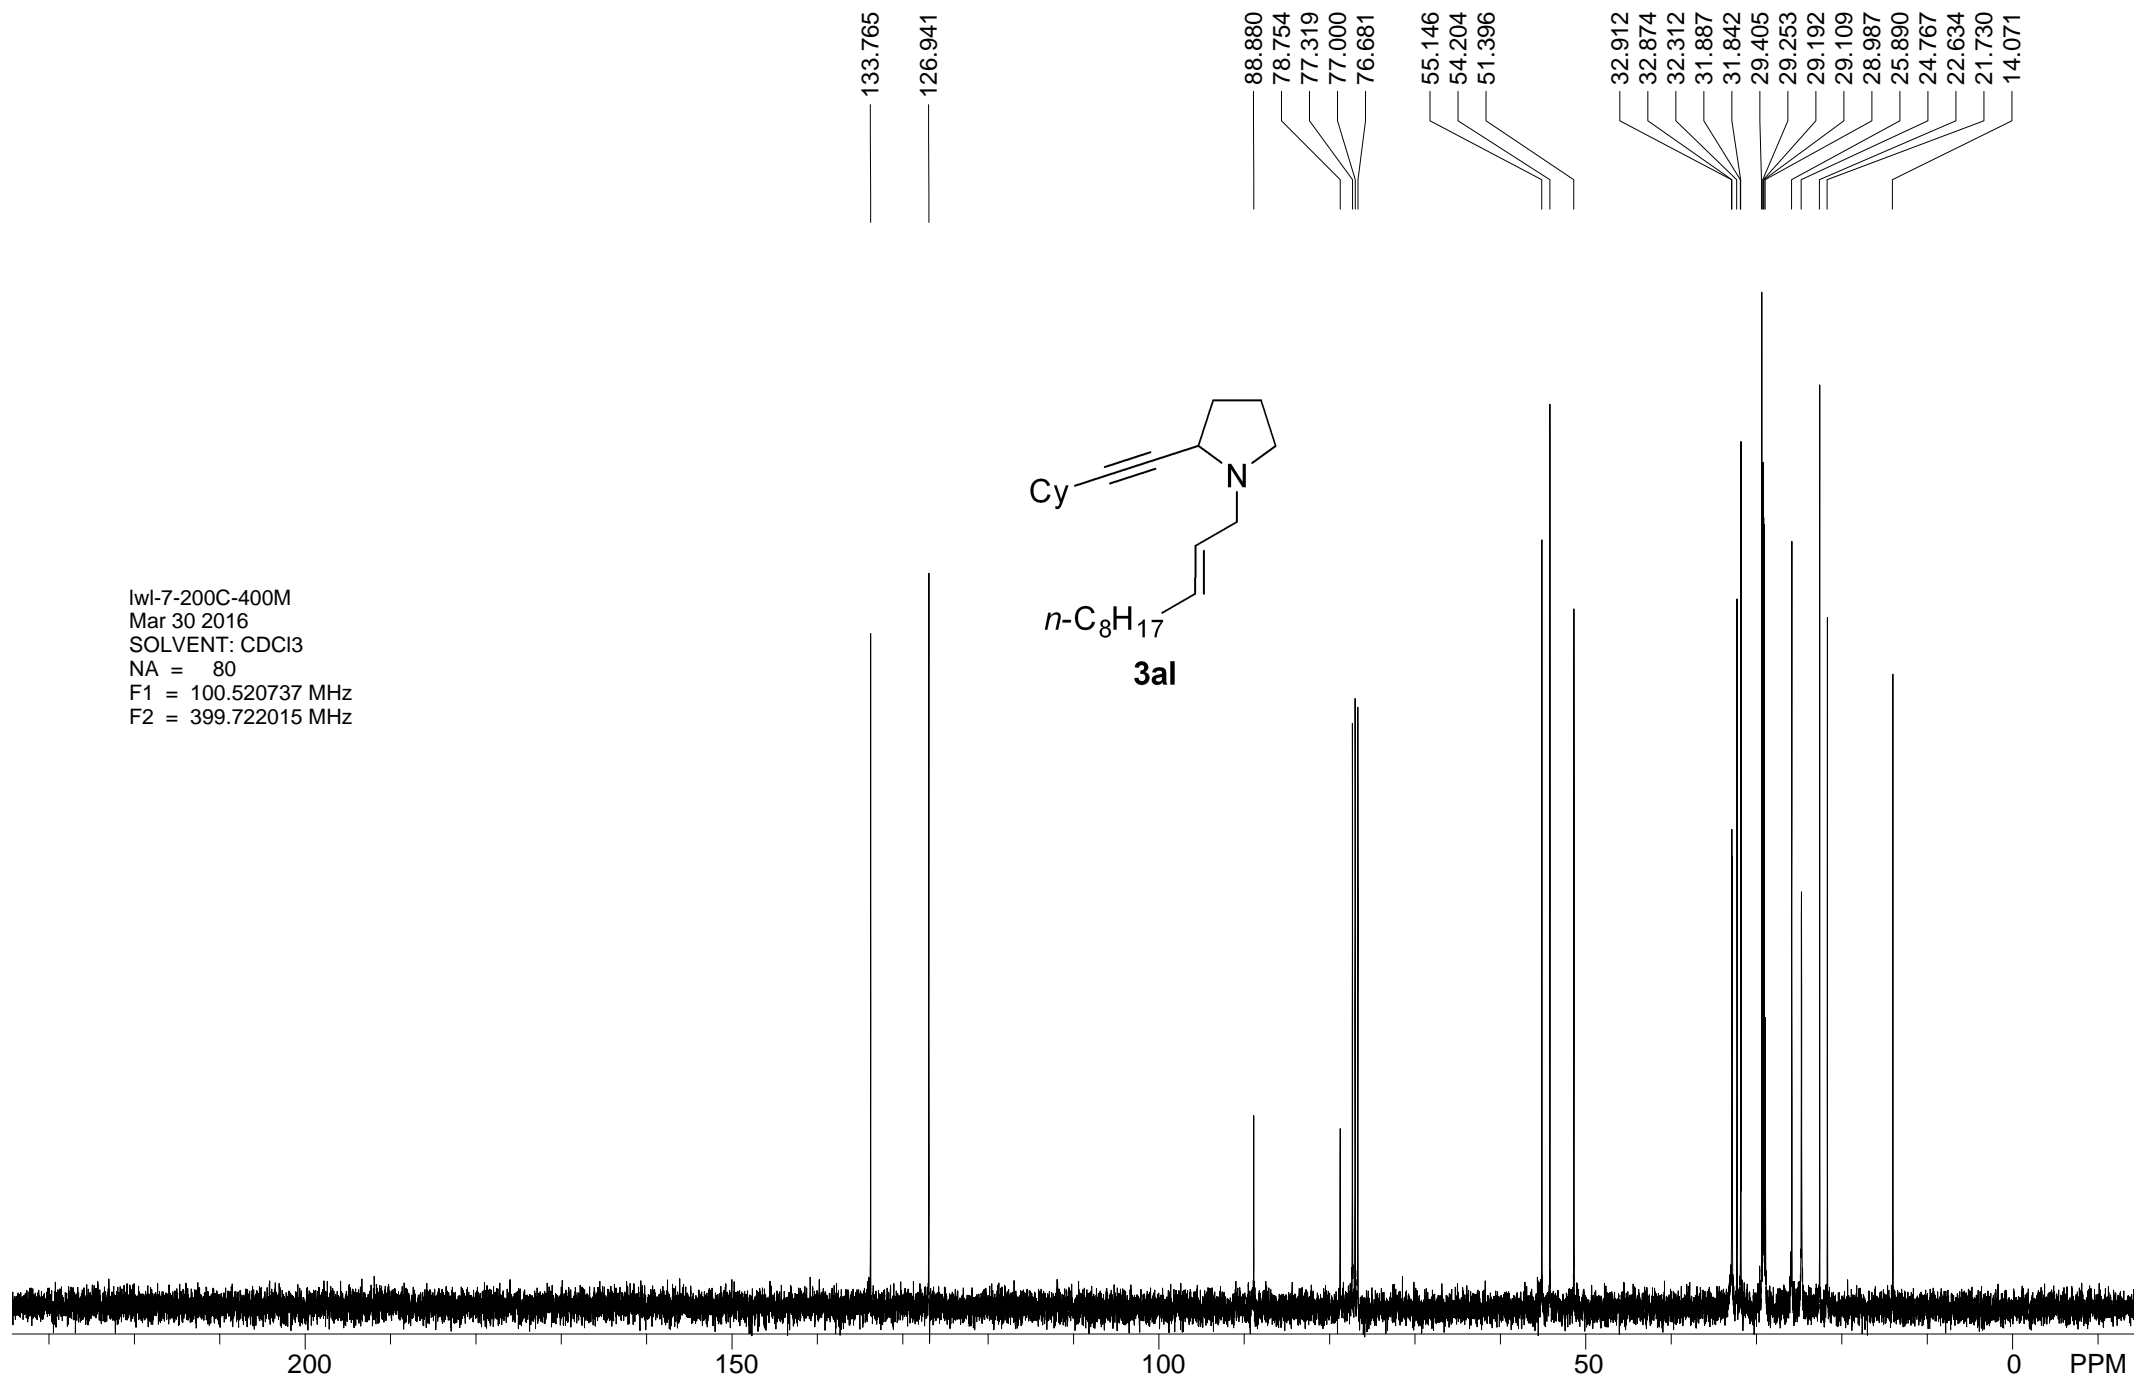

cyf-1-017-H400M  
Jul 3 2017  
SOLVENT: CDCl3  
NA = 8  
F1 = 400.100067 MHz  
F2 = 1.000000 MHz

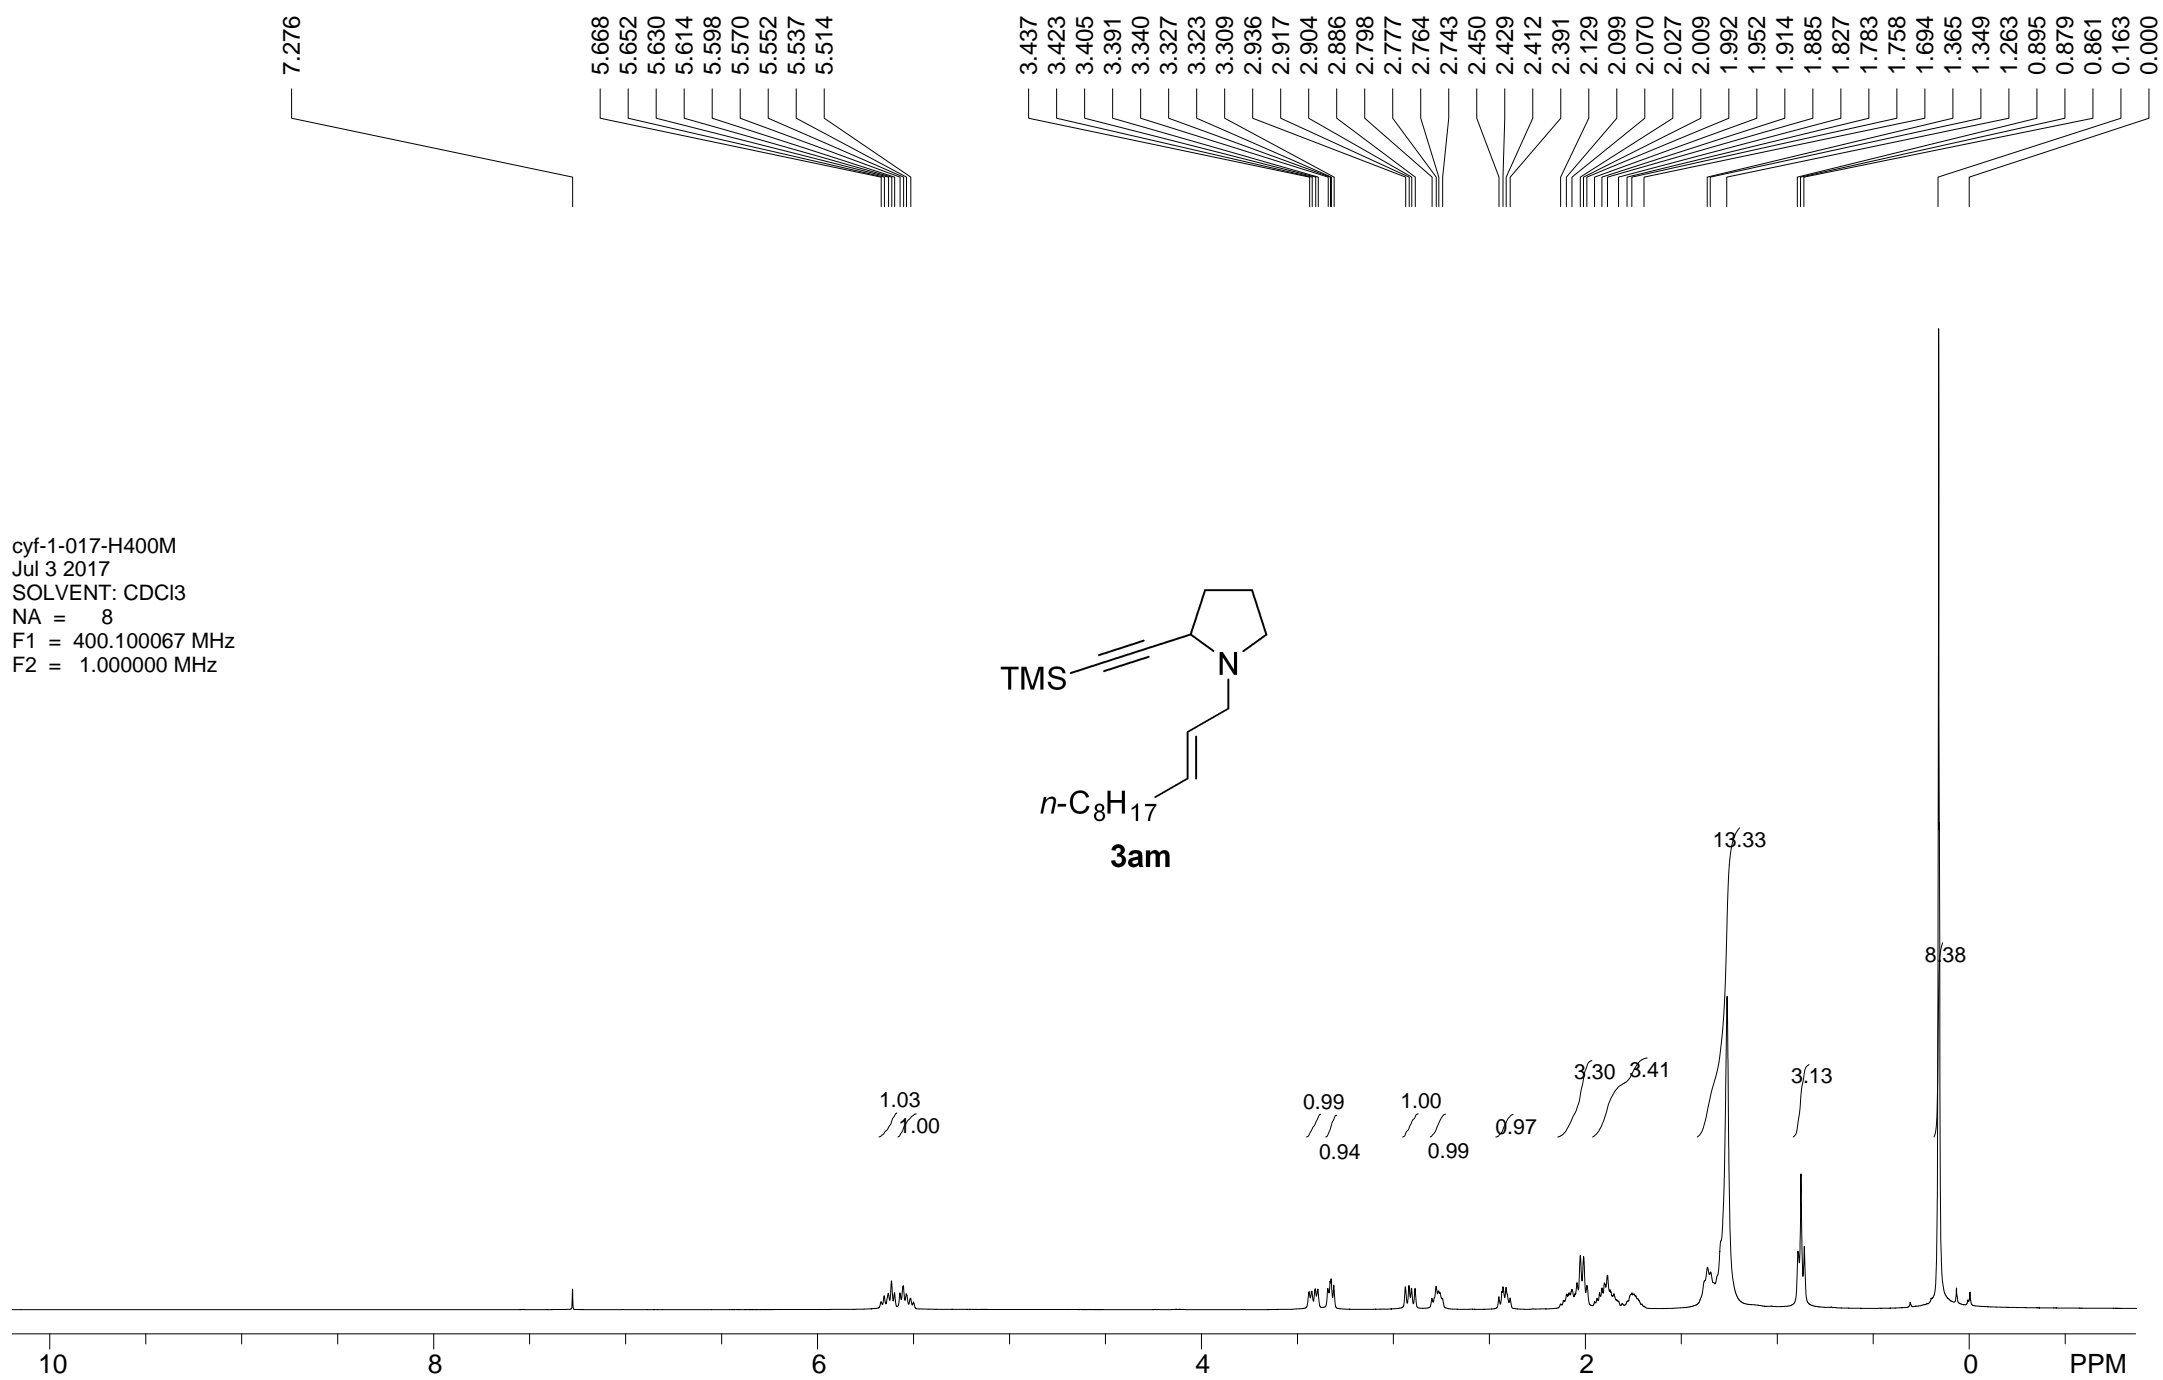

cyf-1-017-C100M  
Jul 4 2017  
SOLVENT: CDCl3  
NA = 40  
F1 = 100.520737 MHz  
F2 = 399.722015 MHz

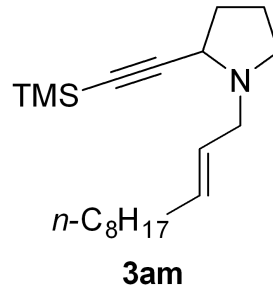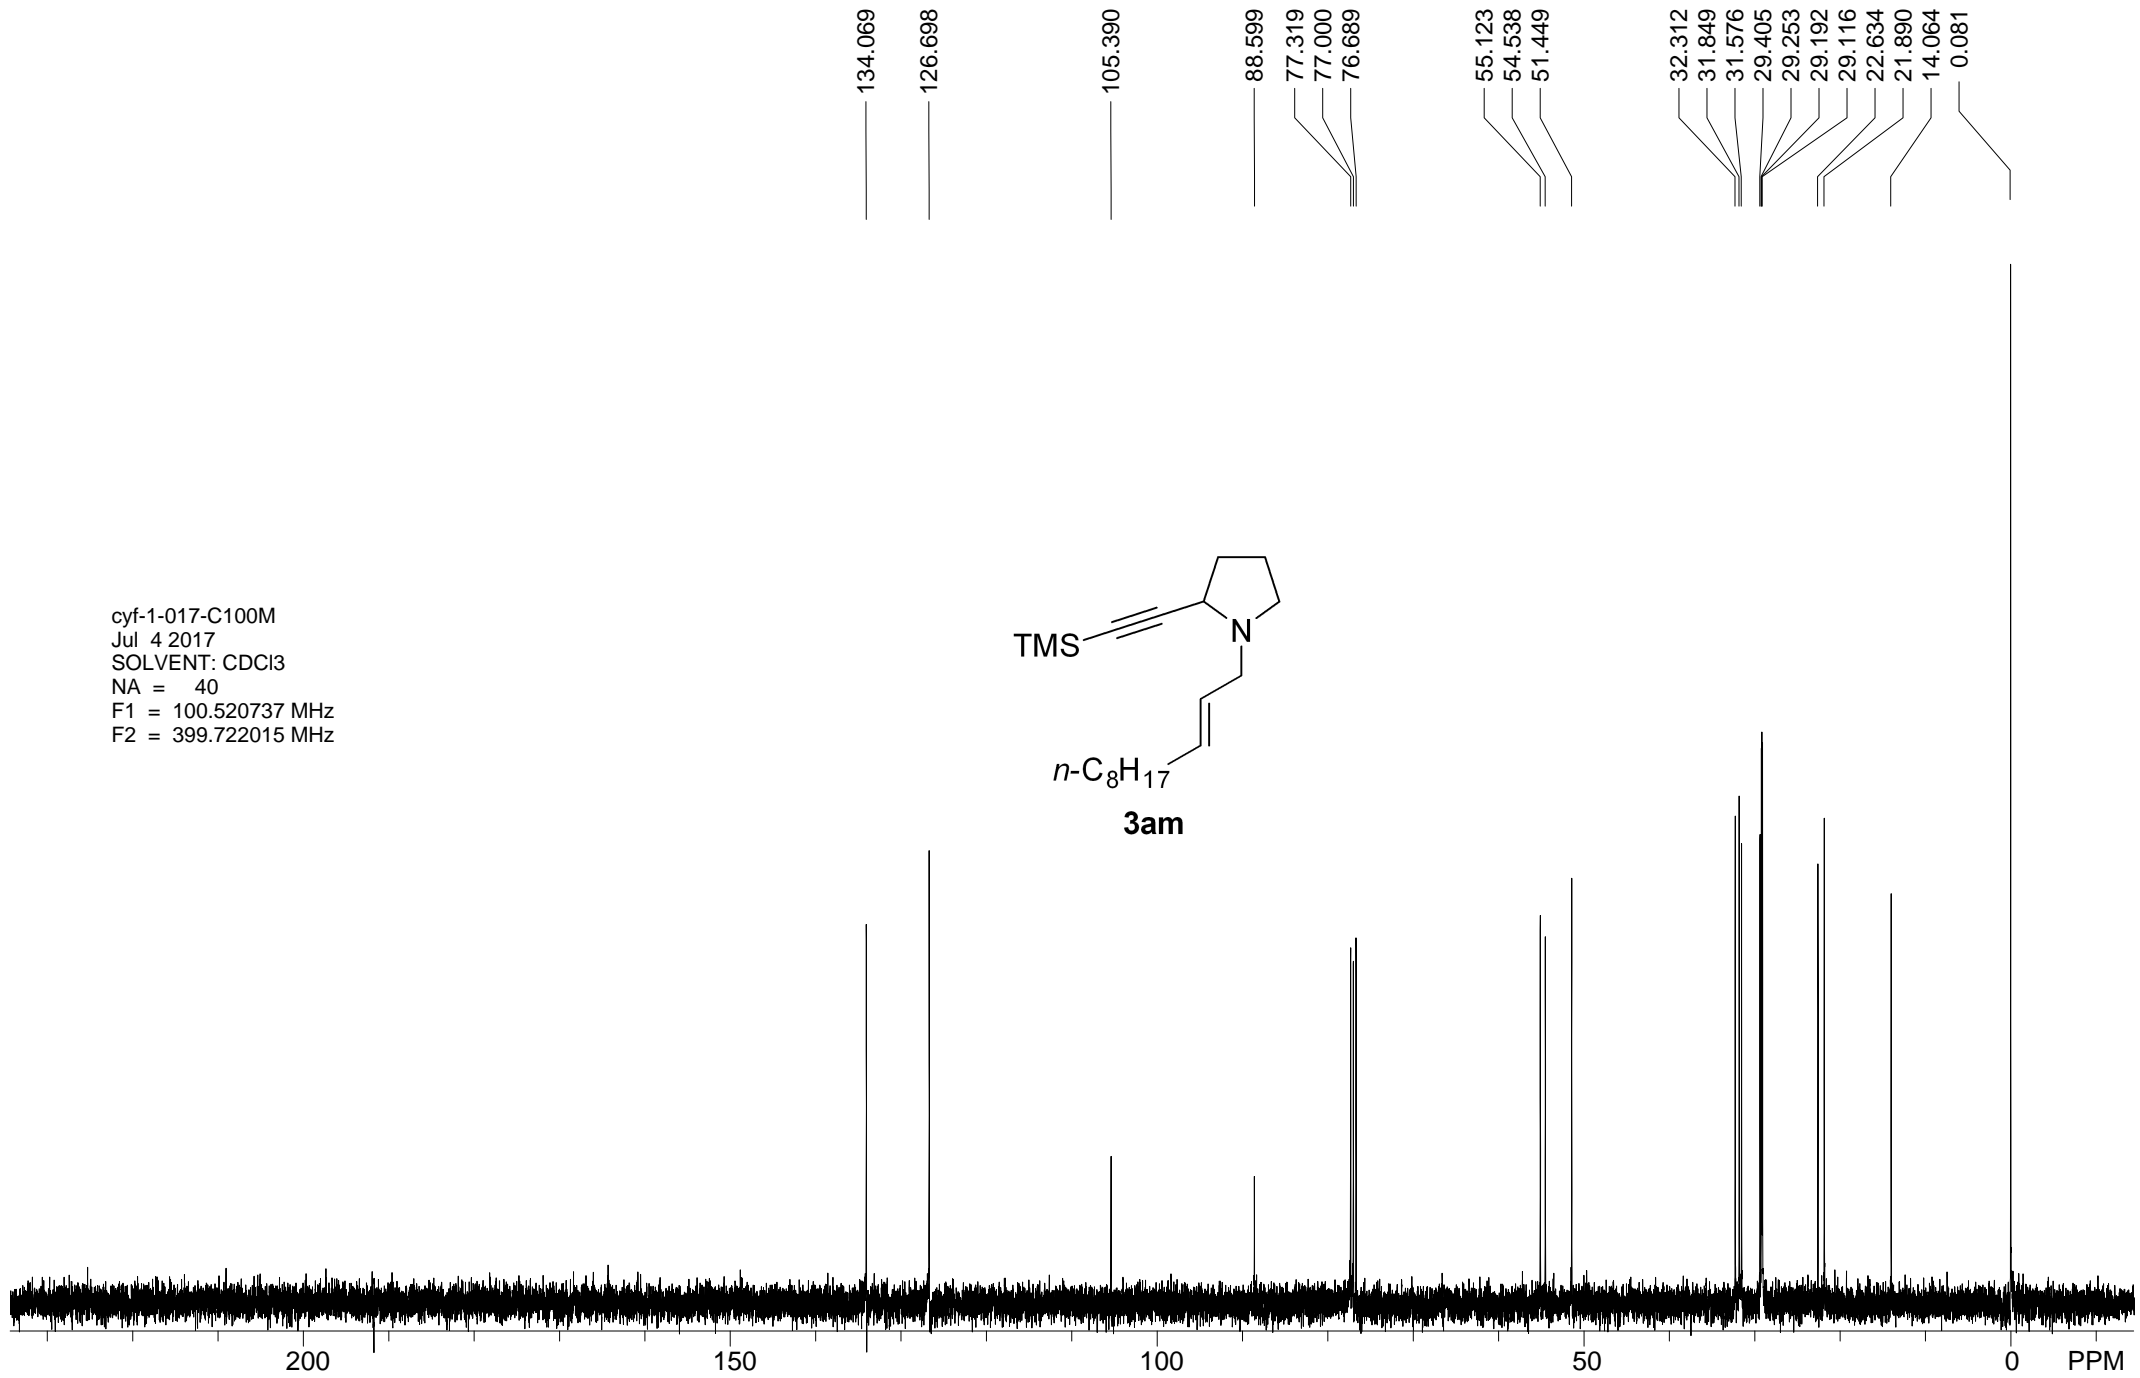

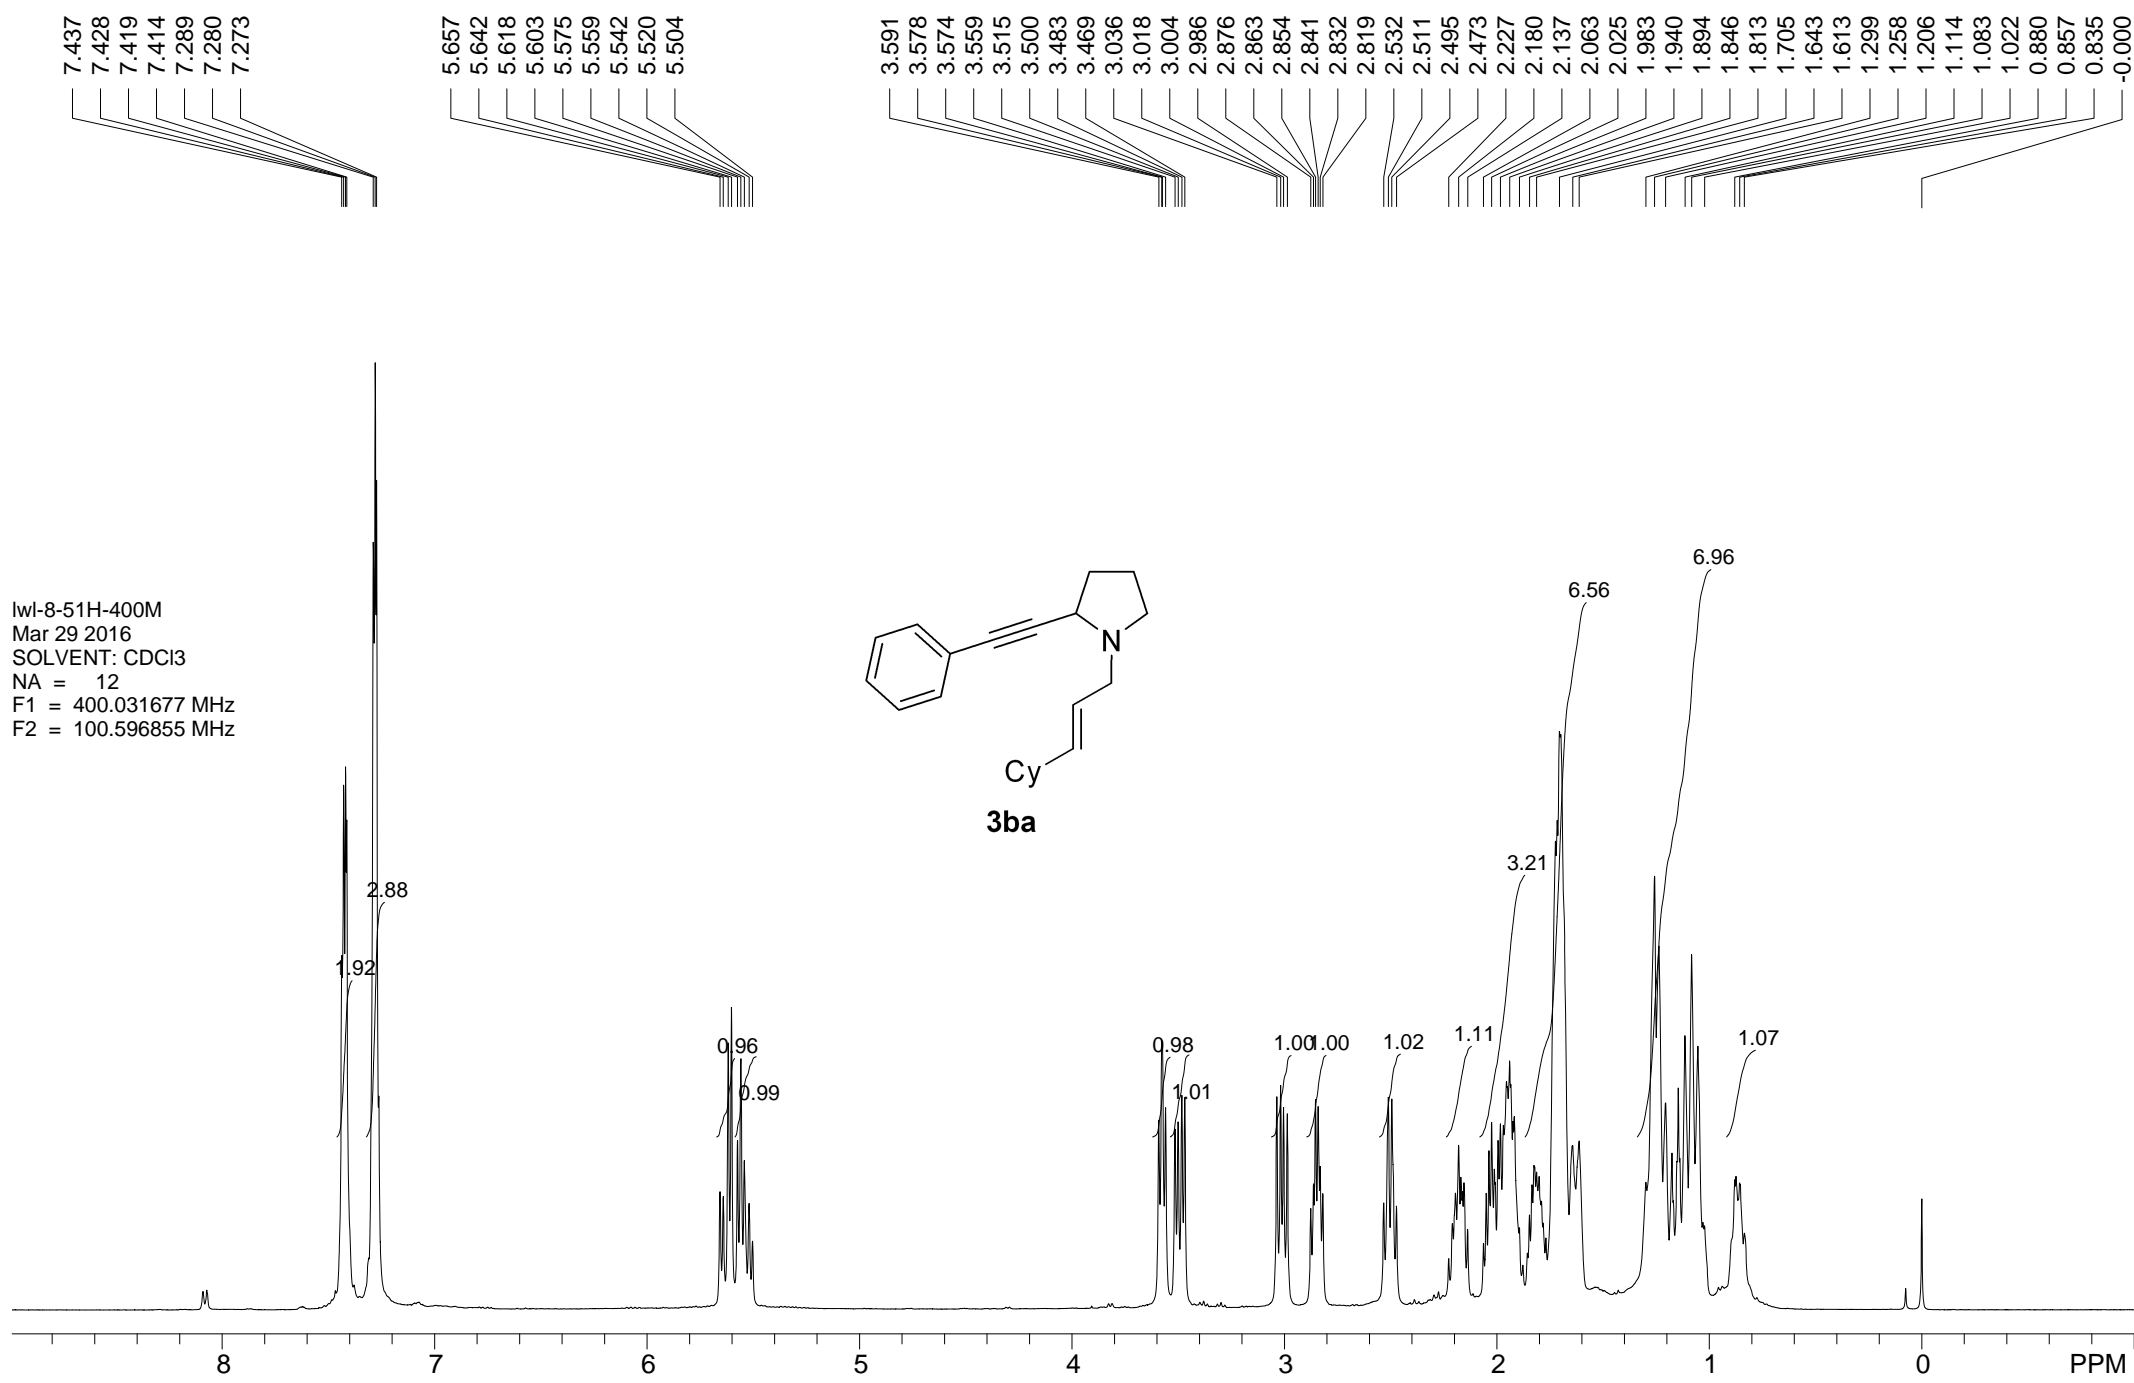

lwl-8-51C-400M  
Mar 30 2016  
SOLVENT: CDCl3  
NA = 64  
F1 = 100.520737 MHz  
F2 = 399.722015 MHz

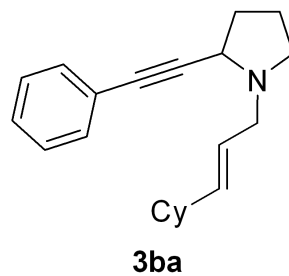

139.929  
131.617  
128.110  
127.814  
124.011  
123.305  
88.622  
84.538  
77.319  
77.000  
76.681  
55.442  
54.500  
51.502  
40.359  
32.813  
32.775  
31.644  
26.126  
25.966  
21.935

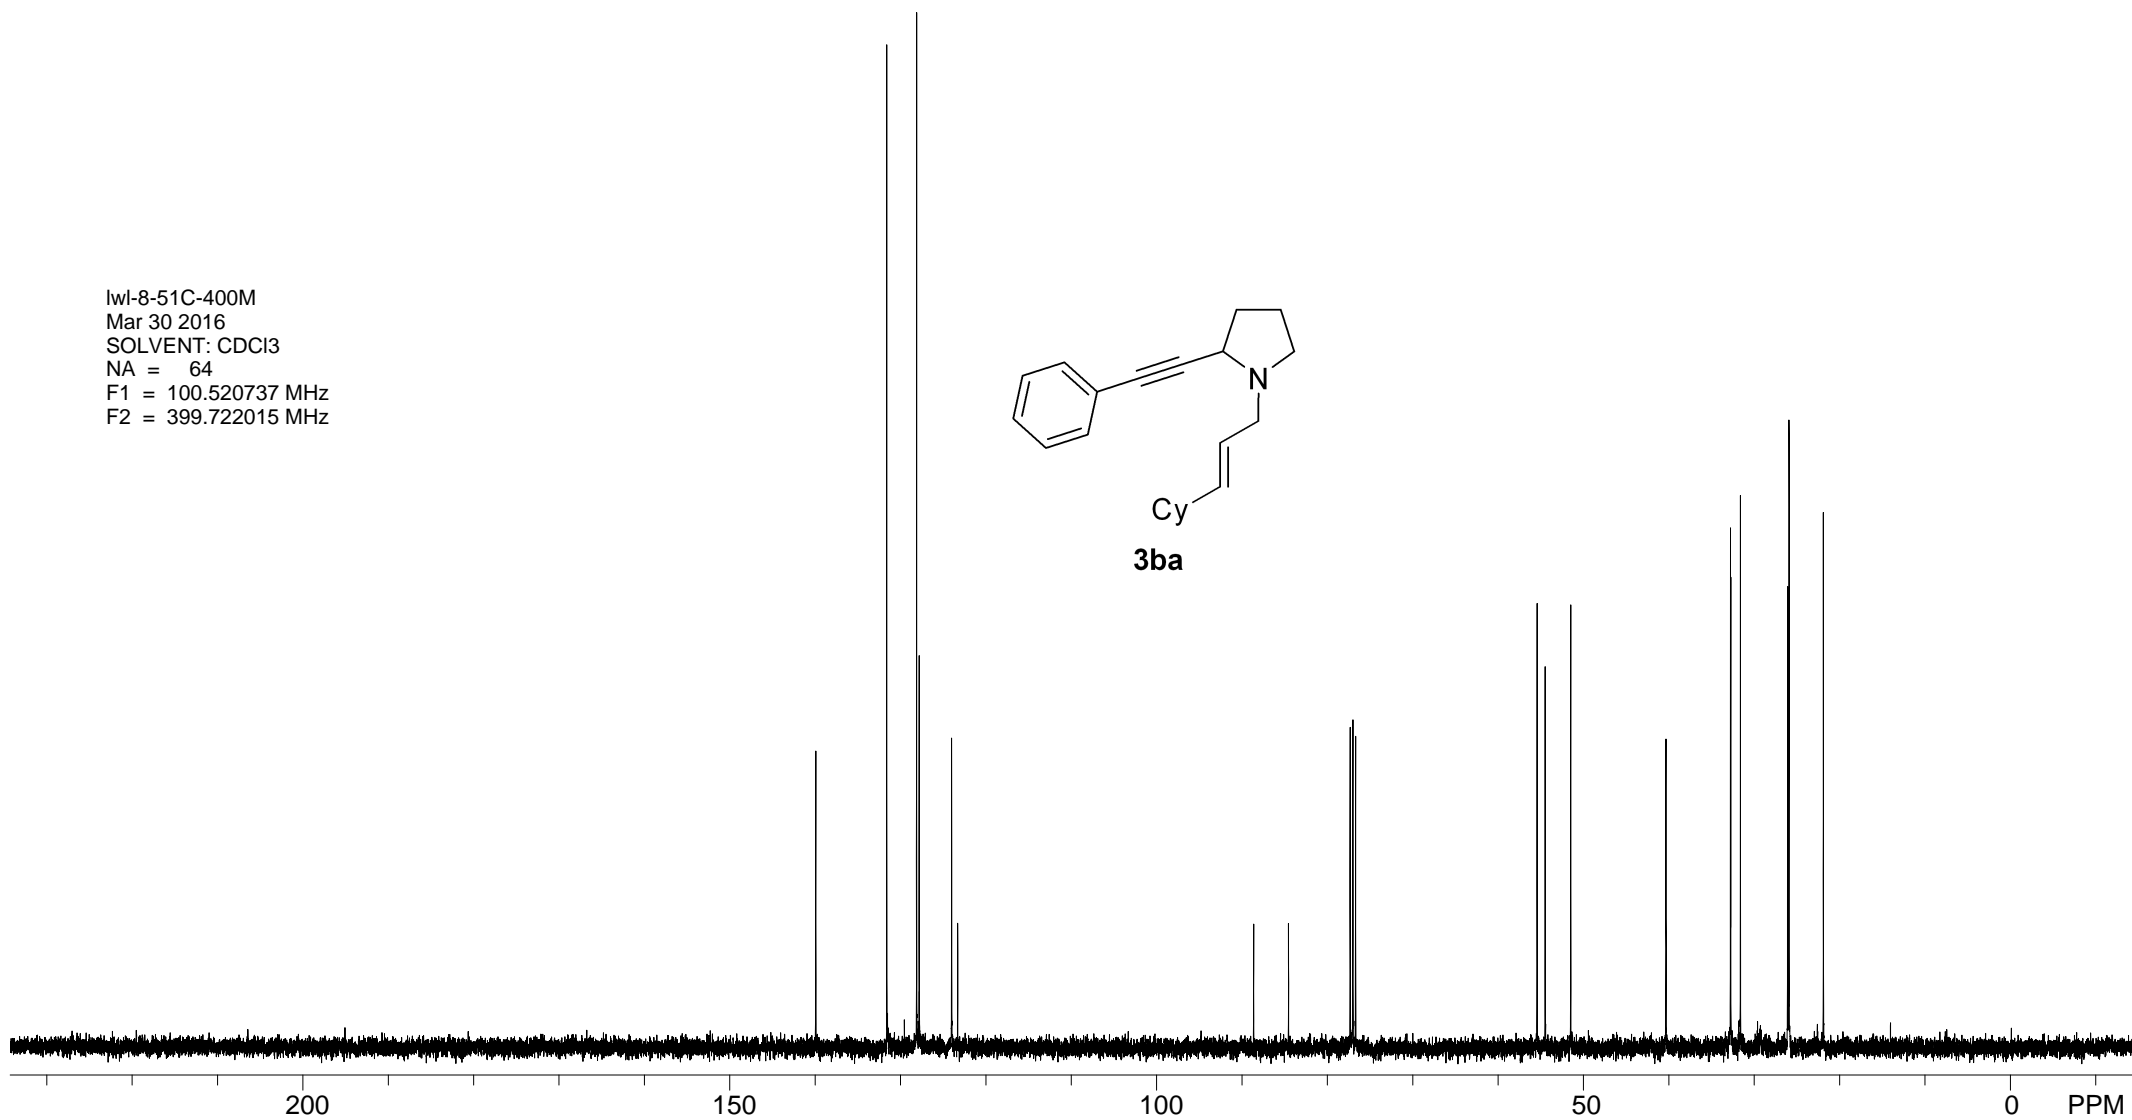

cyf-1-012-H400M  
Jul 1 2017  
SOLVENT: CDCl3  
NA = 12  
F1 = 399.722809 MHz  
F2 = 100.519203 MHz

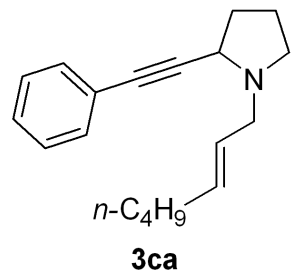

7.425  
7.418  
7.413  
7.272  
7.267  
5.702  
5.686  
5.665  
5.648  
5.633  
5.613  
5.597  
5.580  
5.559  
5.543

3.580  
3.564  
3.549  
3.507  
3.493  
3.475  
3.462  
3.038  
3.019  
3.006  
2.988  
2.869  
2.847  
2.834  
2.813  
2.525  
2.504  
2.486  
2.466  
2.218  
2.186  
2.171  
2.146  
2.129  
2.056  
2.041  
2.025  
2.008  
1.931  
1.913  
1.873  
1.839  
1.815  
1.796  
1.764  
1.392  
1.372  
1.335  
1.300  
1.259  
0.899  
0.882  
0.866  
-0.000

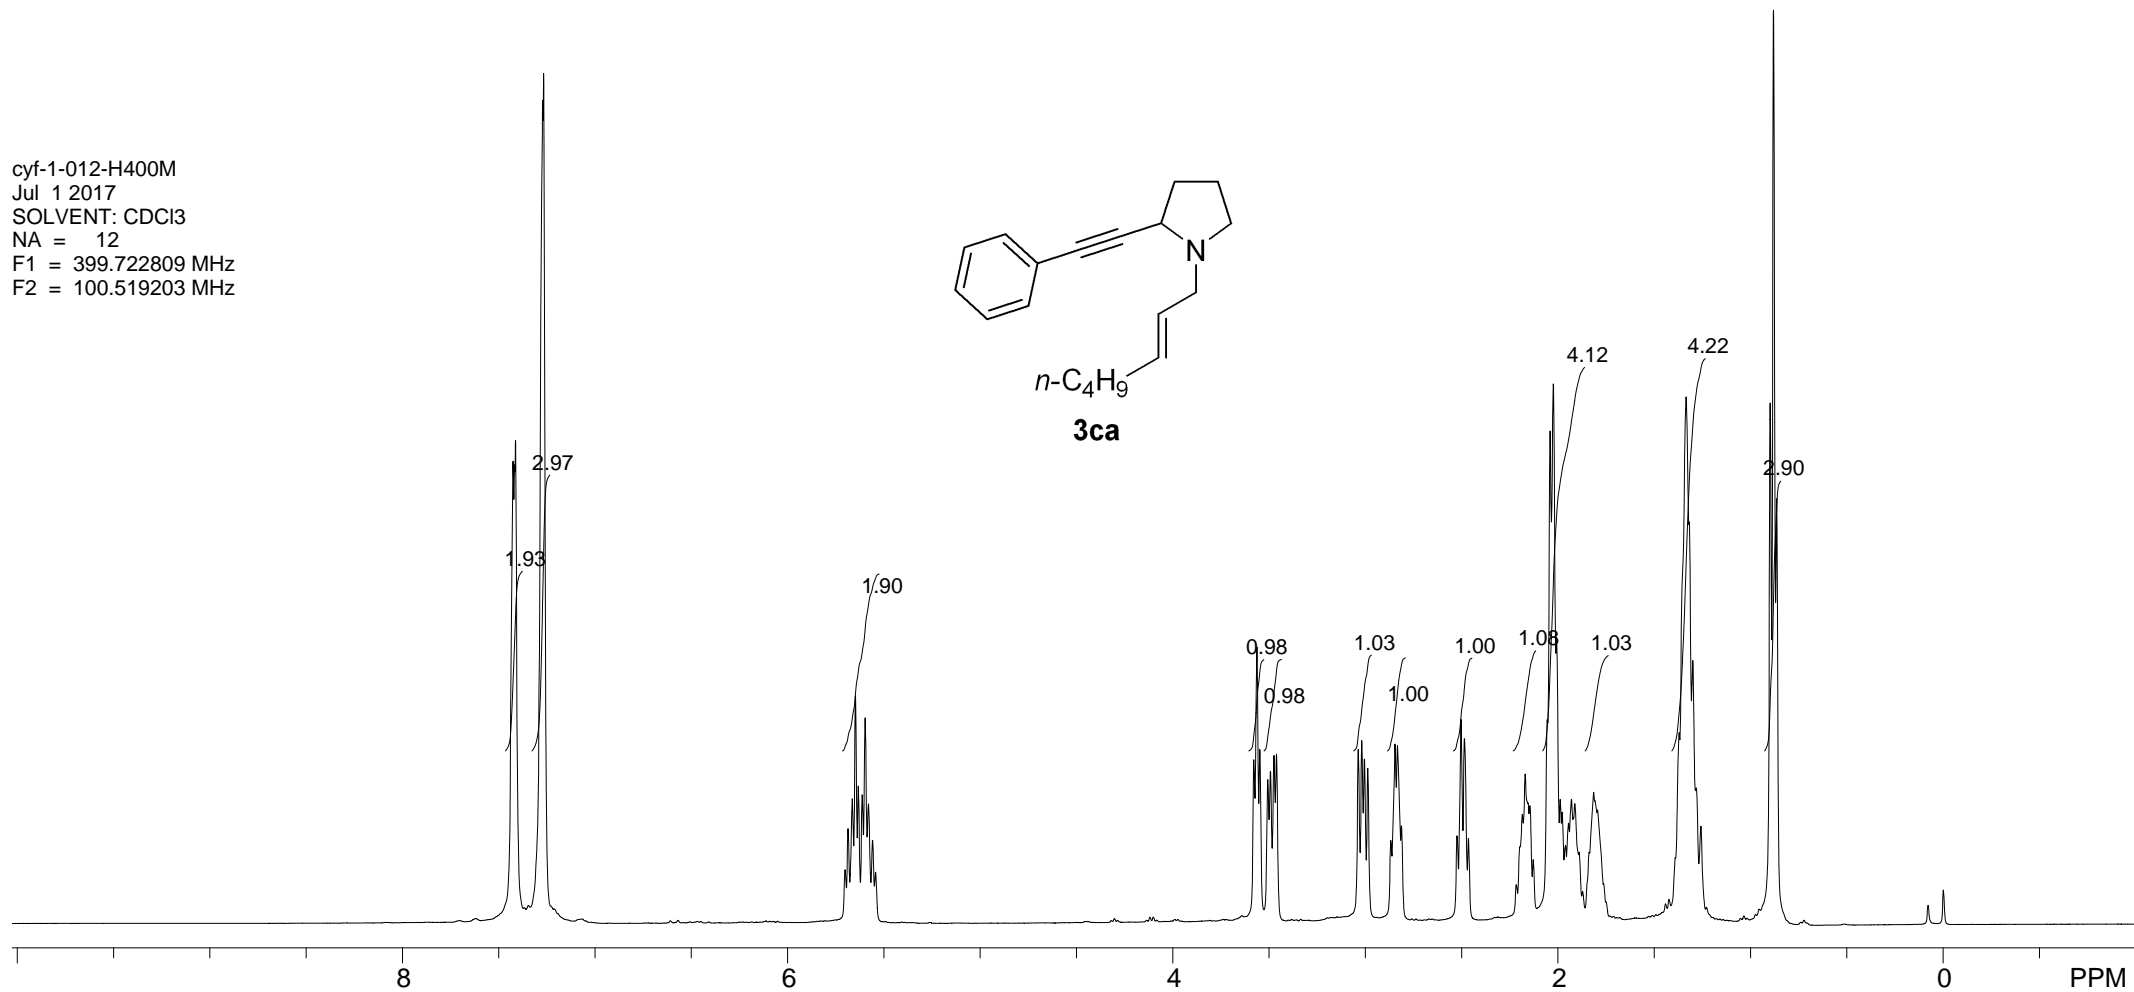



cyf-1-012-C100M  
Jul 1 2017  
SOLVENT: CDCl3  
NA = 72  
F1 = 100.520737 MHz  
F2 = 399.722015 MHz

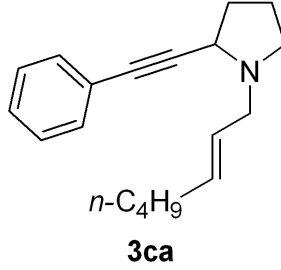

133.932  
131.594  
128.079  
127.761  
126.759  
123.350

88.713  
84.492  
77.319  
77.000  
76.681

55.275  
54.493  
51.540

31.955  
31.675  
31.310  
22.102  
21.958  
13.843

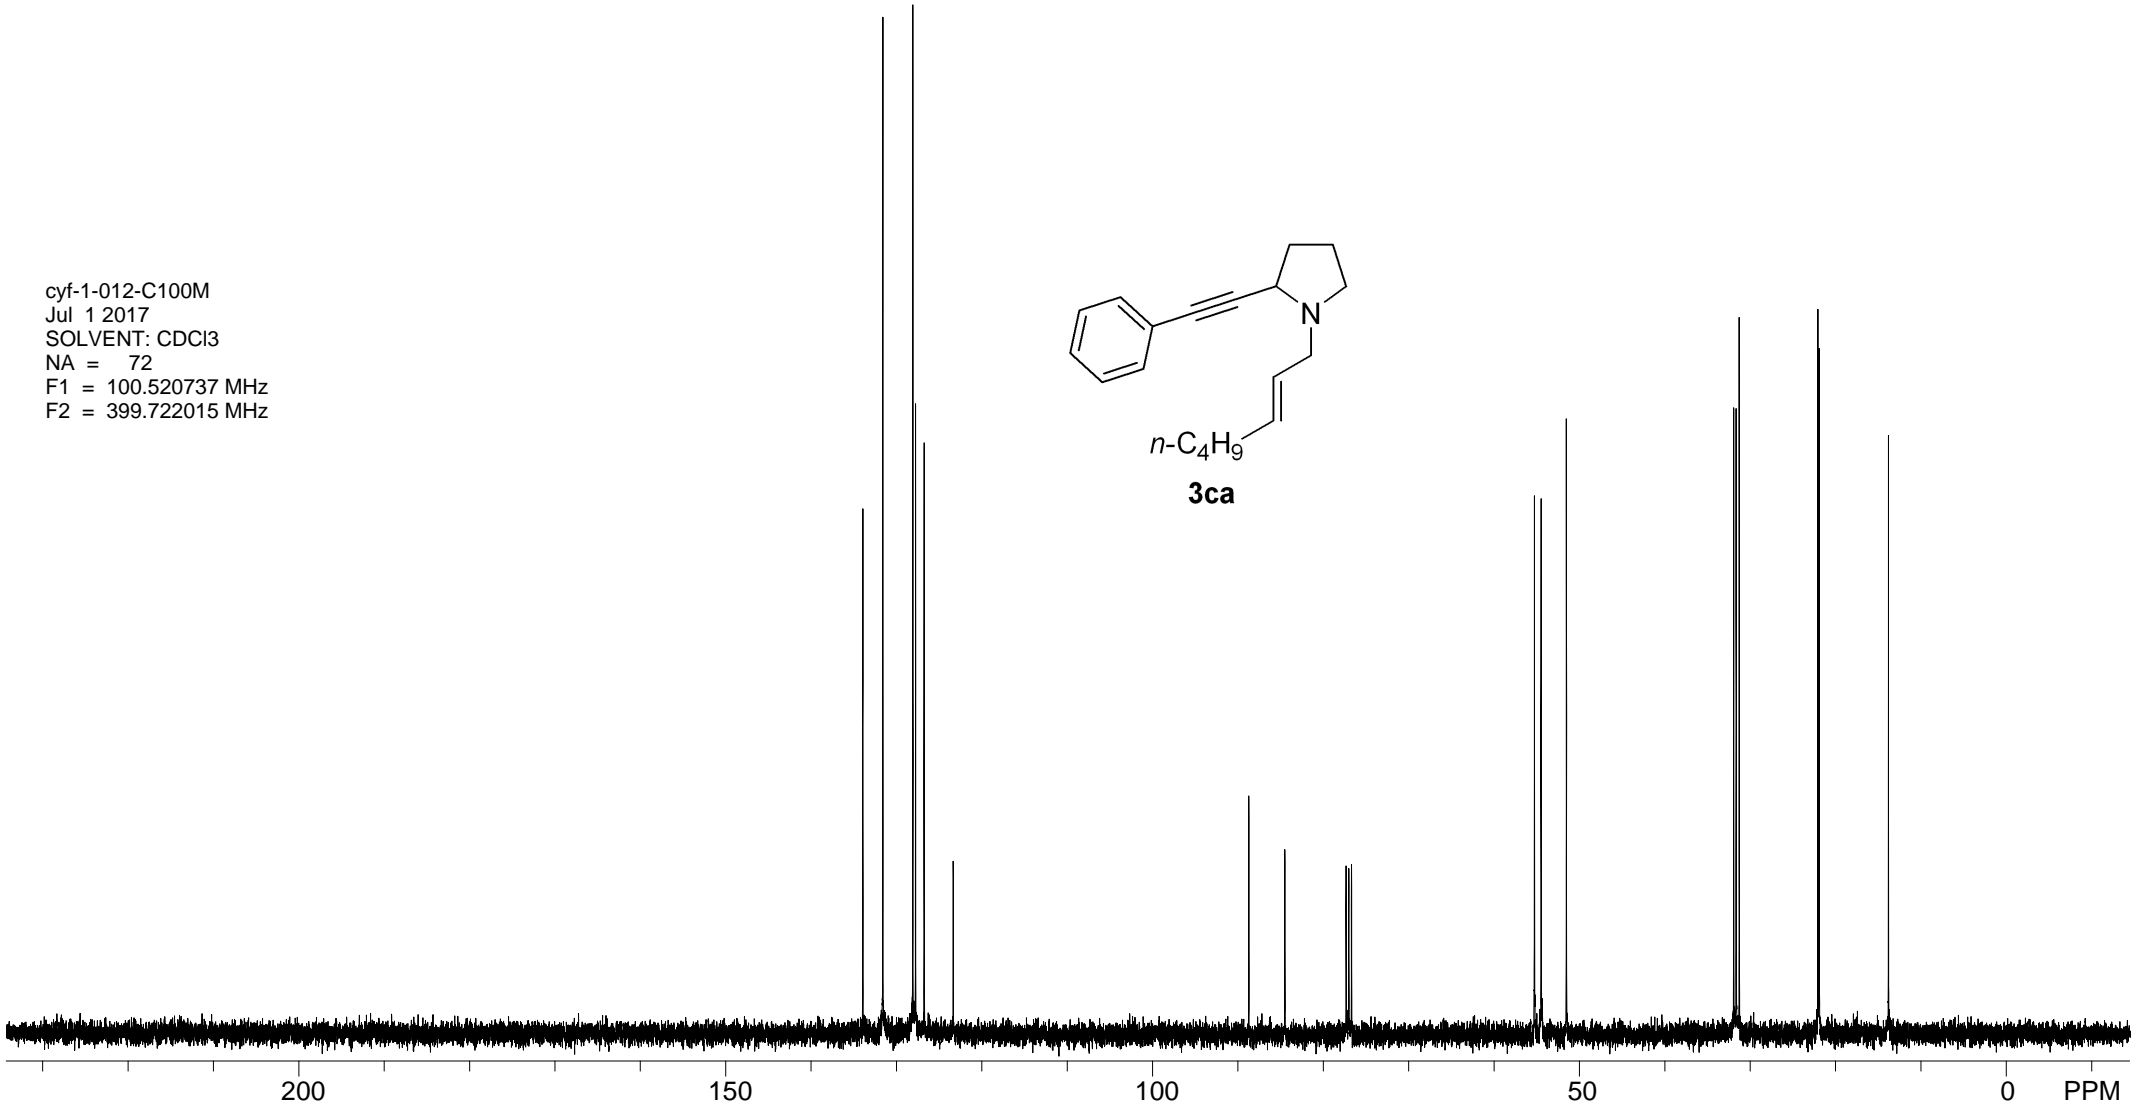

lwl-9-70H-400M  
Jun 23 2017  
SOLVENT: CDCl3  
NA = 8  
F1 = 400.031219 MHz  
F2 = 100.596855 MHz

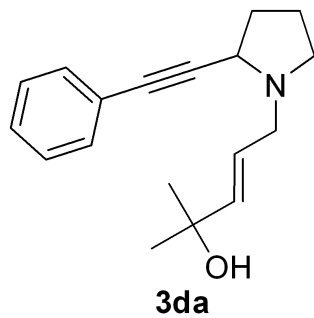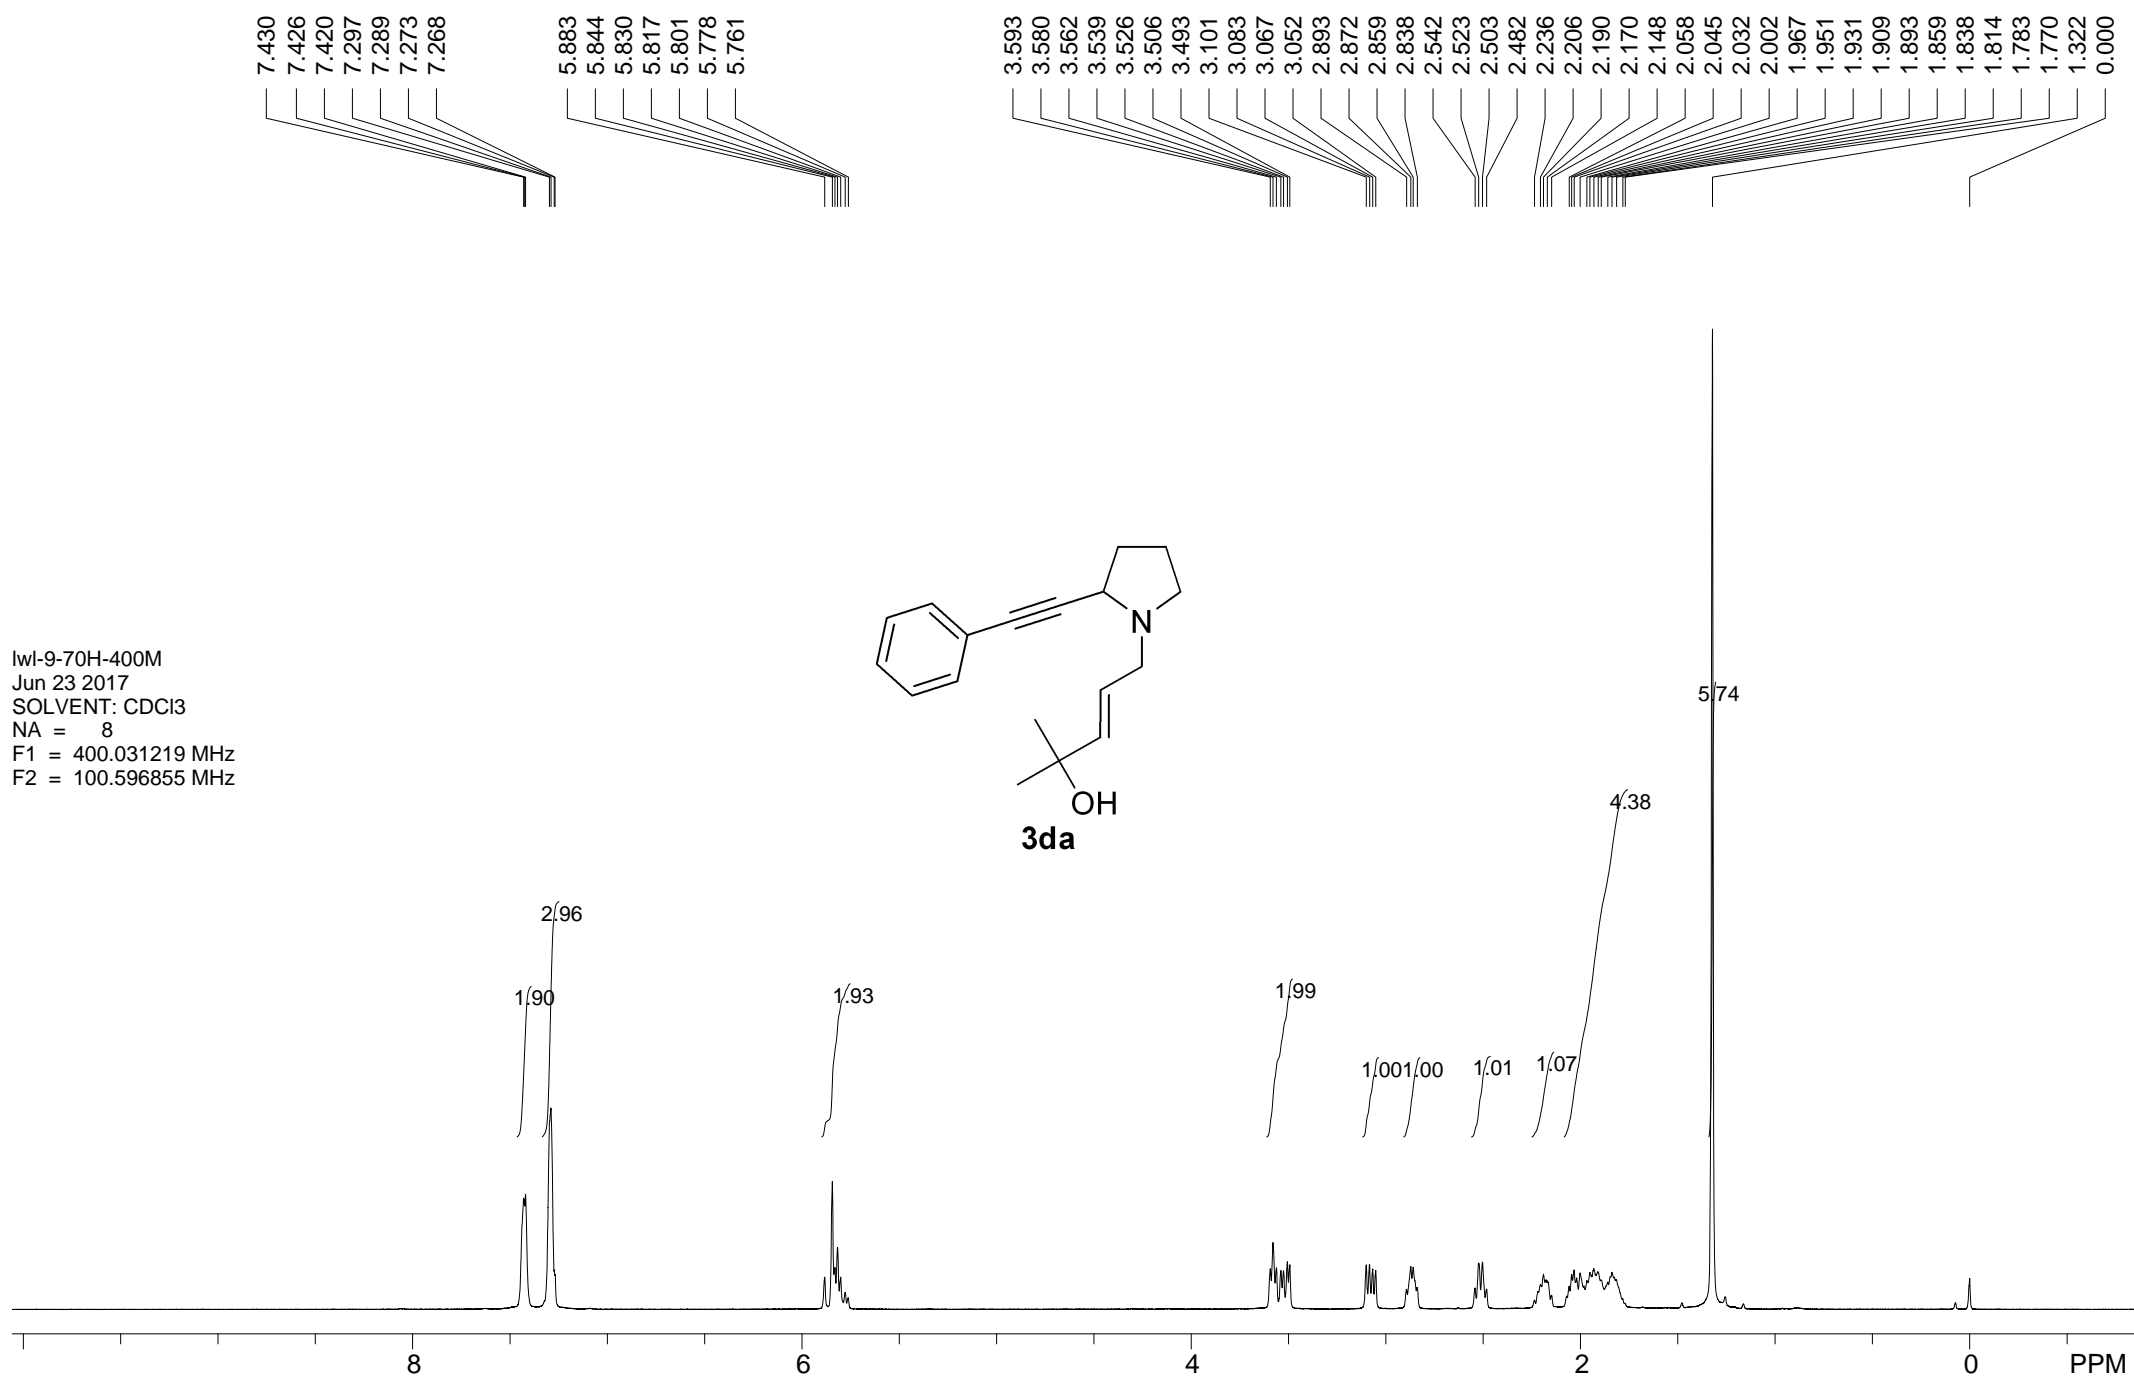

lwl-9-70C-400M  
Jun 23 2017  
SOLVENT: CDCl3  
NA = 208  
F1 = 100.597885 MHz  
F2 = 400.030792 MHz

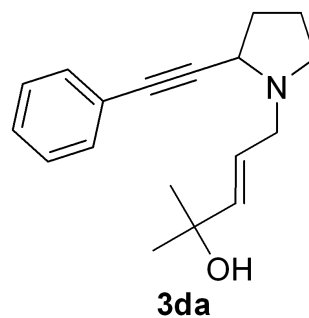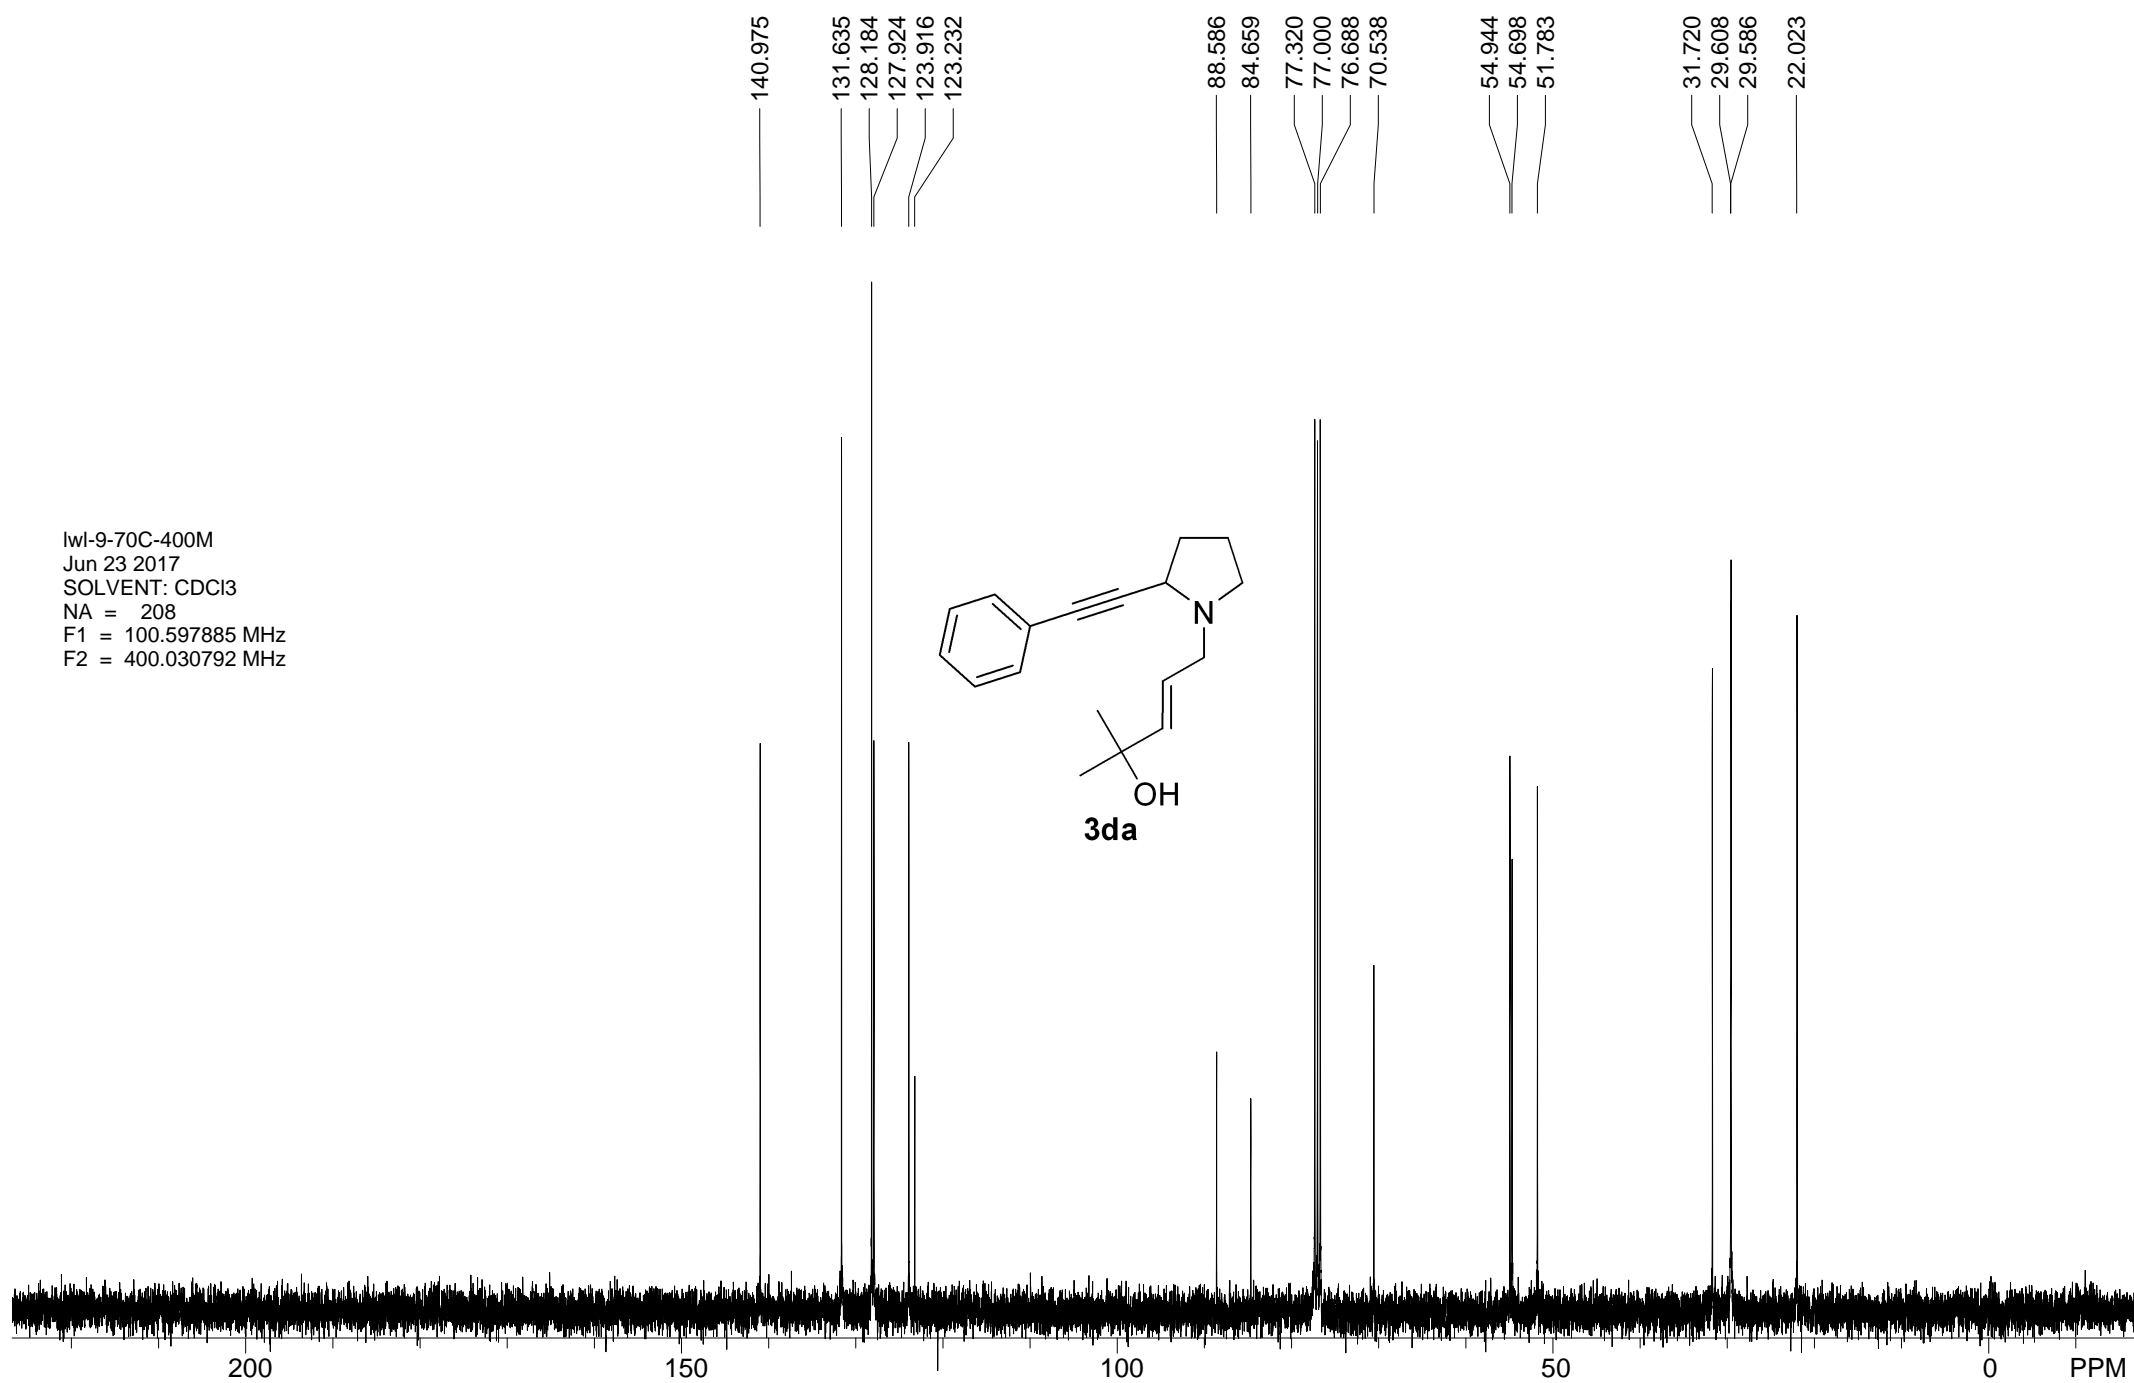

lwi-8-53H-400M  
Mar 29 2016  
SOLVENT: CDCl3  
NA = 8  
F1 = 399.722015 MHz  
F2 = 100.519203 MHz

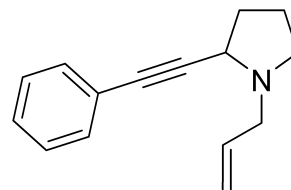

3ea

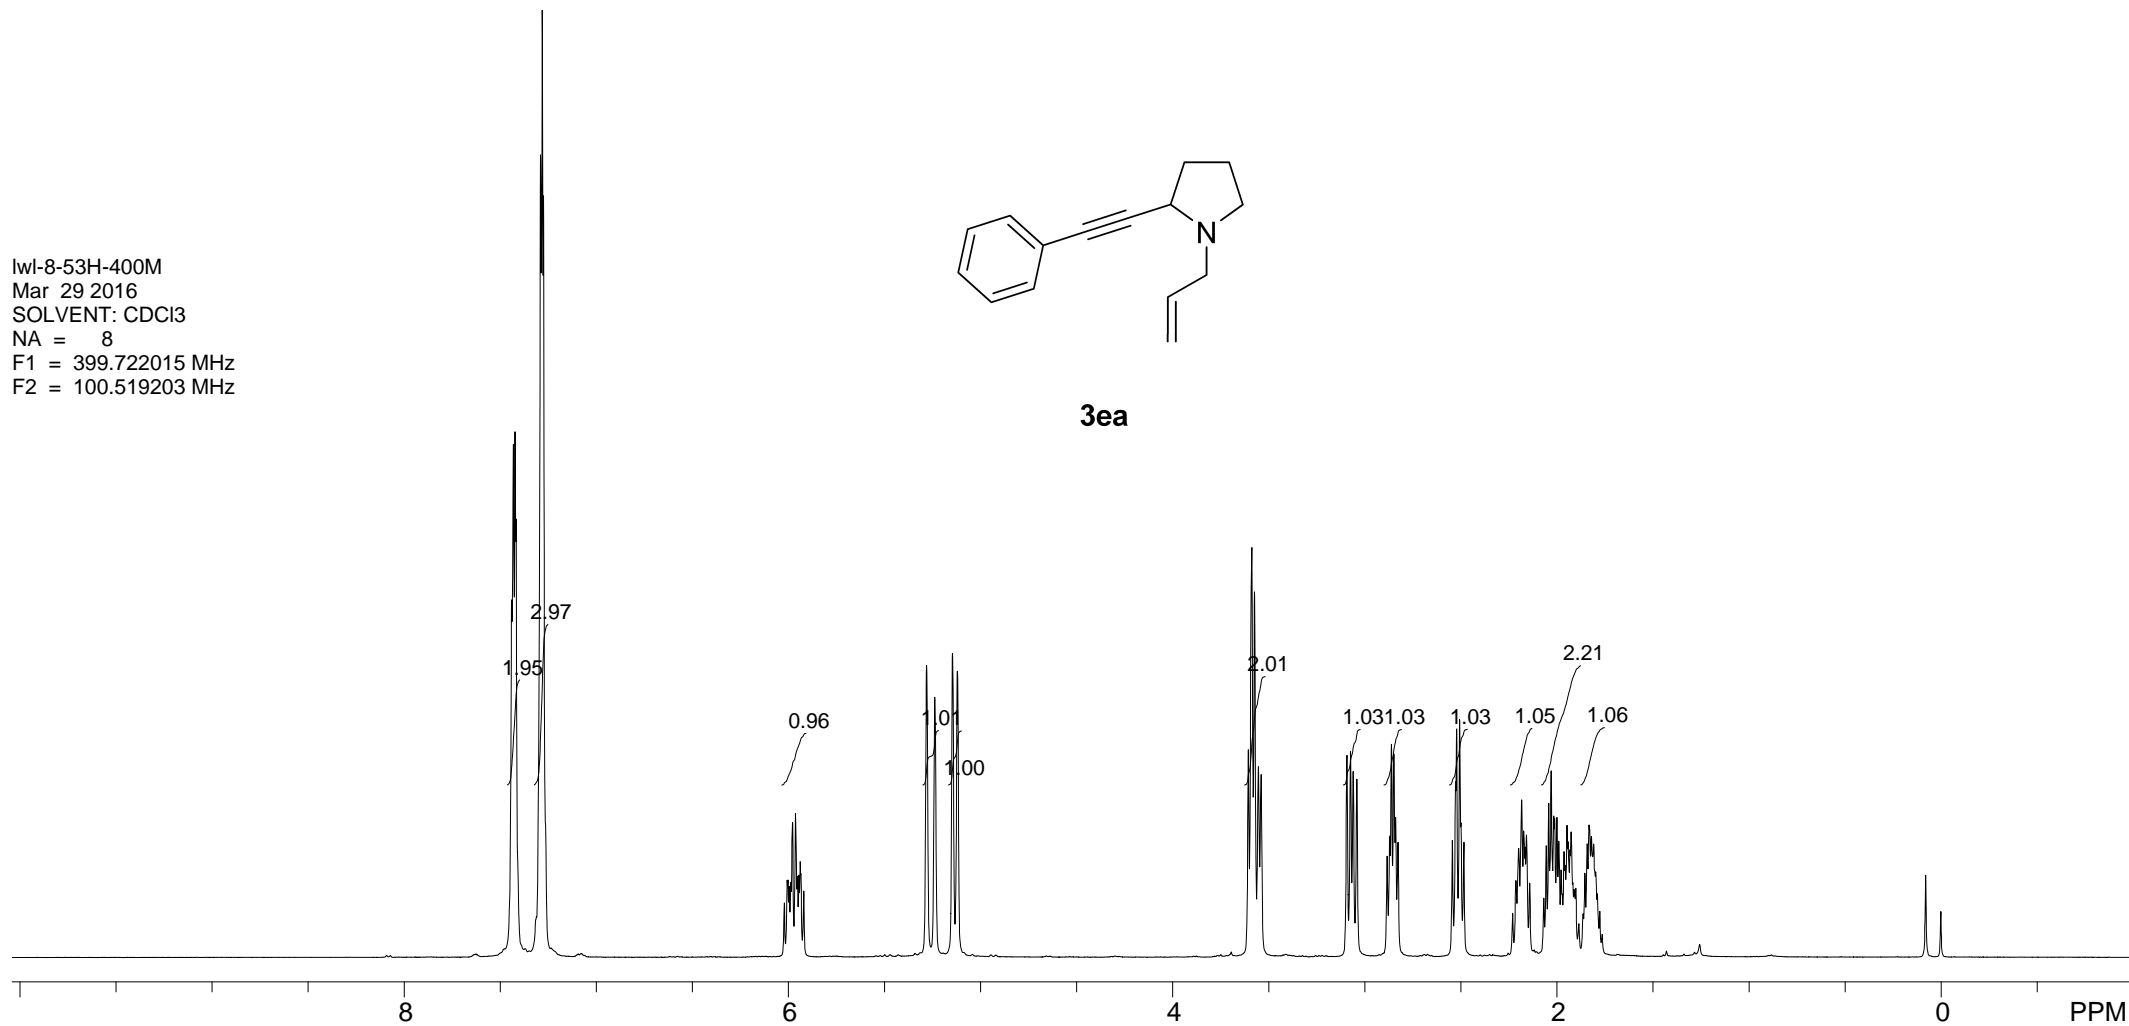

lwl-8-53C-400M  
Mar 29 2016  
SOLVENT: CDCl3  
NA = 80  
F1 = 100.597885 MHz  
F2 = 400.030792 MHz

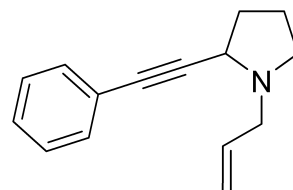

3ea

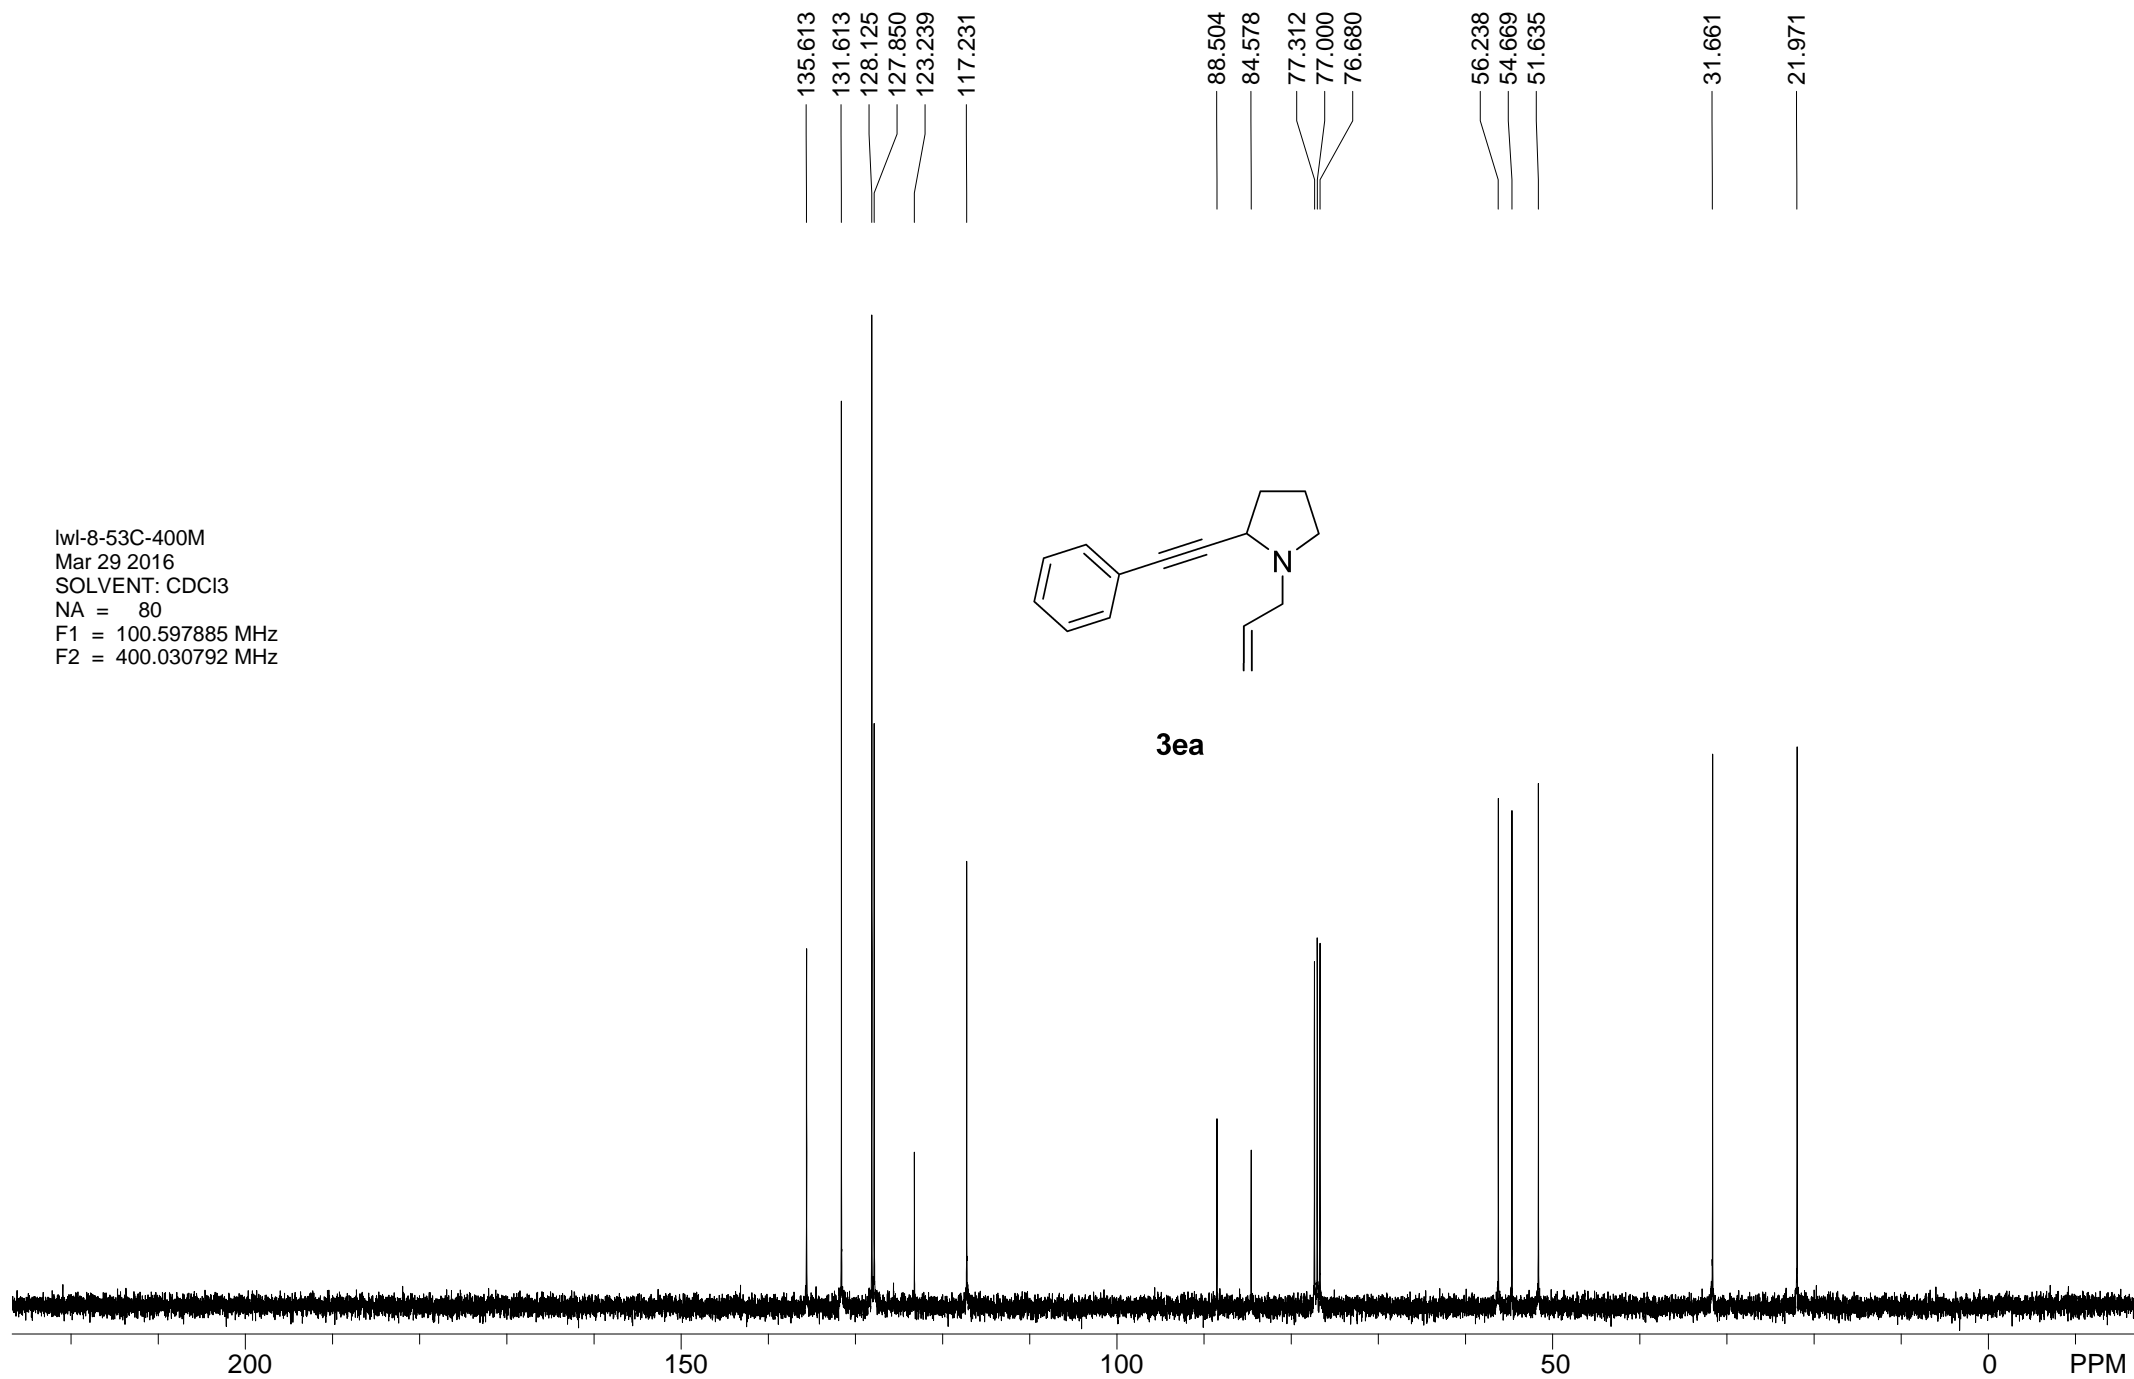

7.383  
7.376  
7.371  
7.359  
7.354  
7.347  
7.270  
6.836  
6.829  
6.824  
6.812  
6.807  
6.800  
6.020  
6.006  
6.001  
5.995  
5.987  
5.977  
5.963  
5.952  
5.944  
5.938  
5.933  
5.919  
5.275  
5.272  
5.232  
5.229  
5.138  
5.113  
3.793  
3.598  
3.583  
3.565  
3.560  
3.546  
3.541  
3.527  
3.062  
3.042  
3.029  
3.010  
2.893  
2.881  
2.871  
2.859  
2.849  
2.837  
2.506  
2.490  
2.484  
2.468  
2.461  
2.446  
2.220  
2.204  
2.189  
2.174  
2.163  
2.150  
2.132  
2.054  
2.015  
1.984  
1.955  
1.940  
1.919  
1.893  
1.854  
1.820  
1.789  
1.767  
0.000

lwl-8-54H-400M  
Mar 30 2016  
SOLVENT: CDCl3  
NA = 8  
F1 = 399.722809 MHz  
F2 = 100.519203 MHz

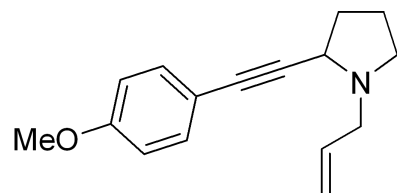

**3ec**

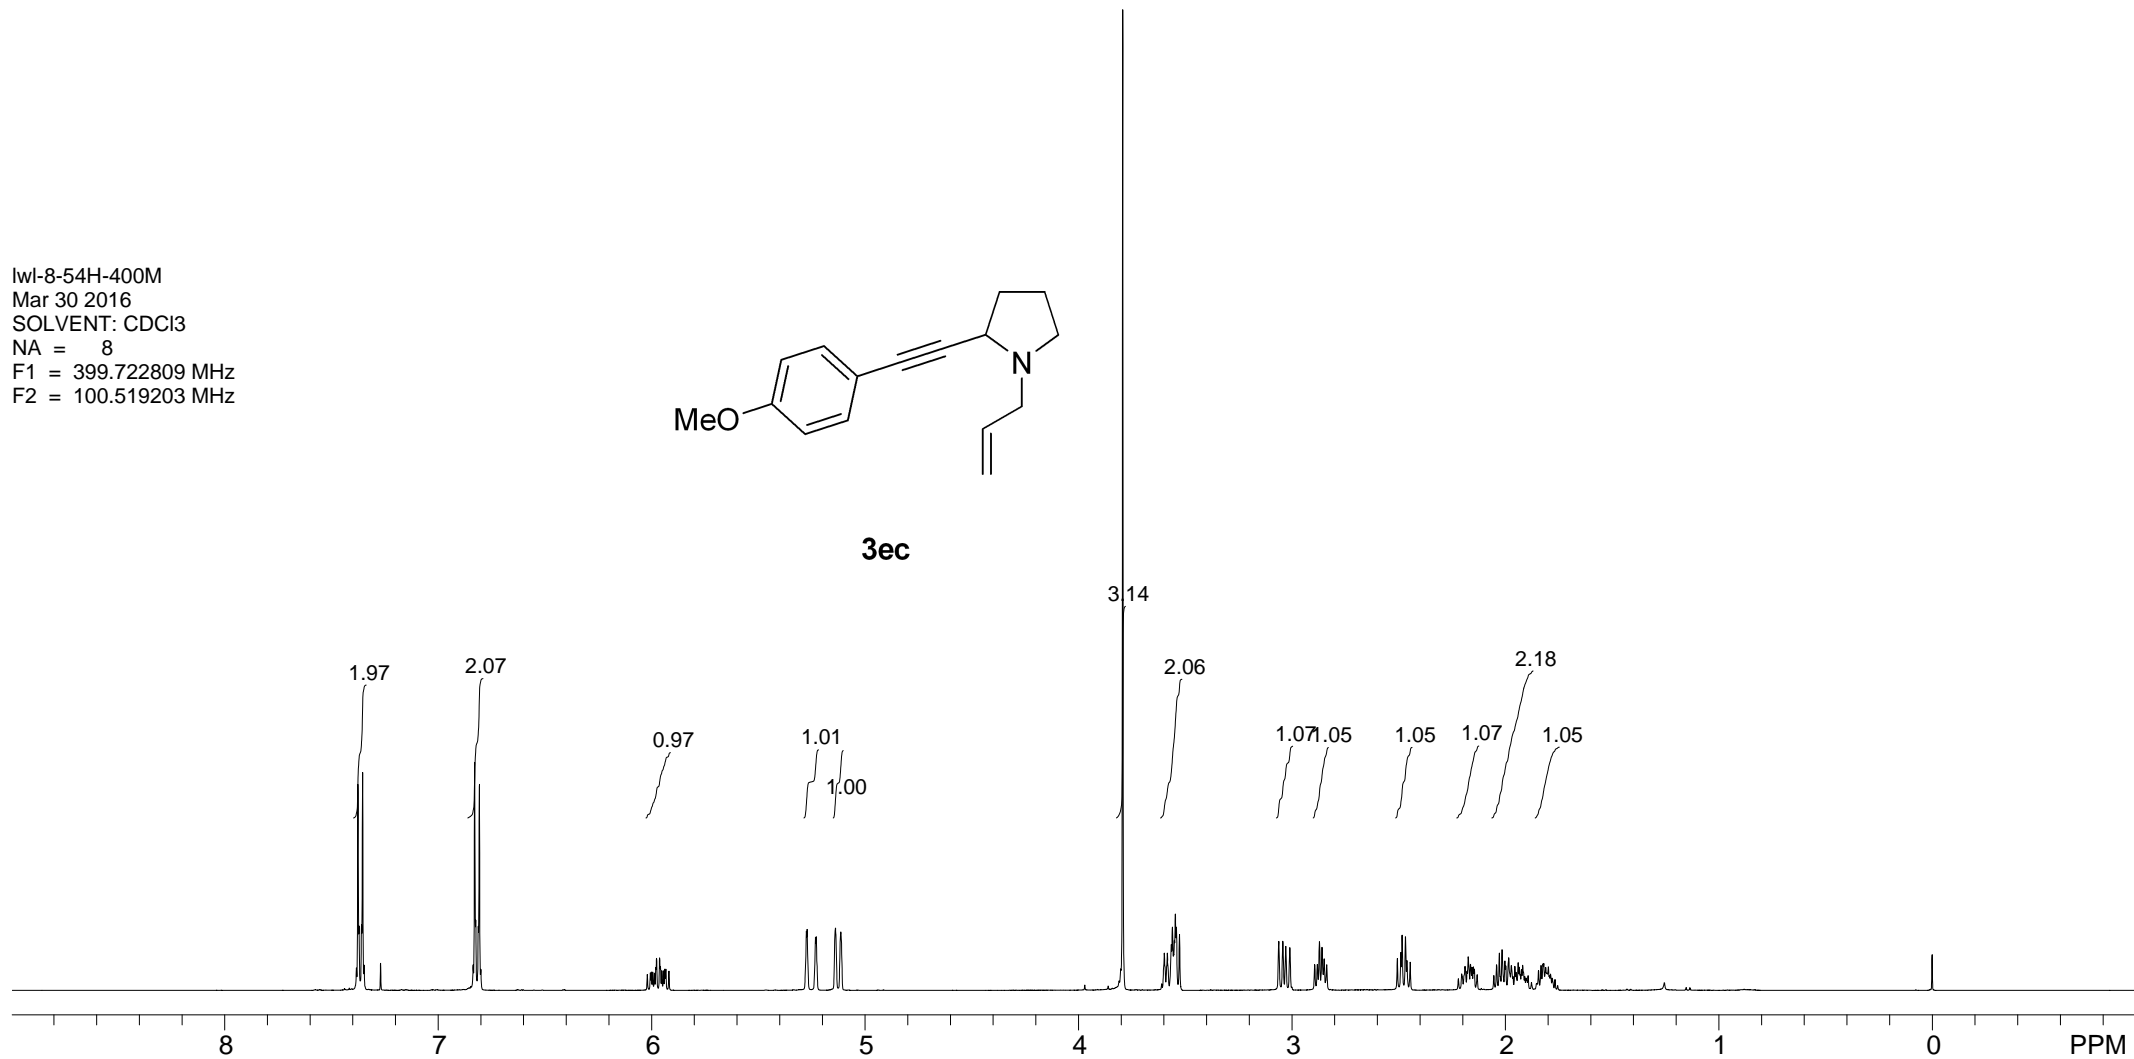

lwl-8-54C-400M  
Mar 30 2016  
SOLVENT: CDCl3  
NA = 40  
F1 = 100.520737 MHz  
F2 = 399.722015 MHz

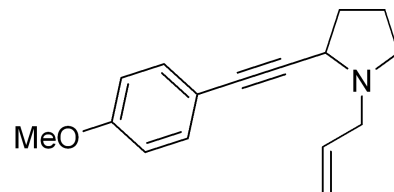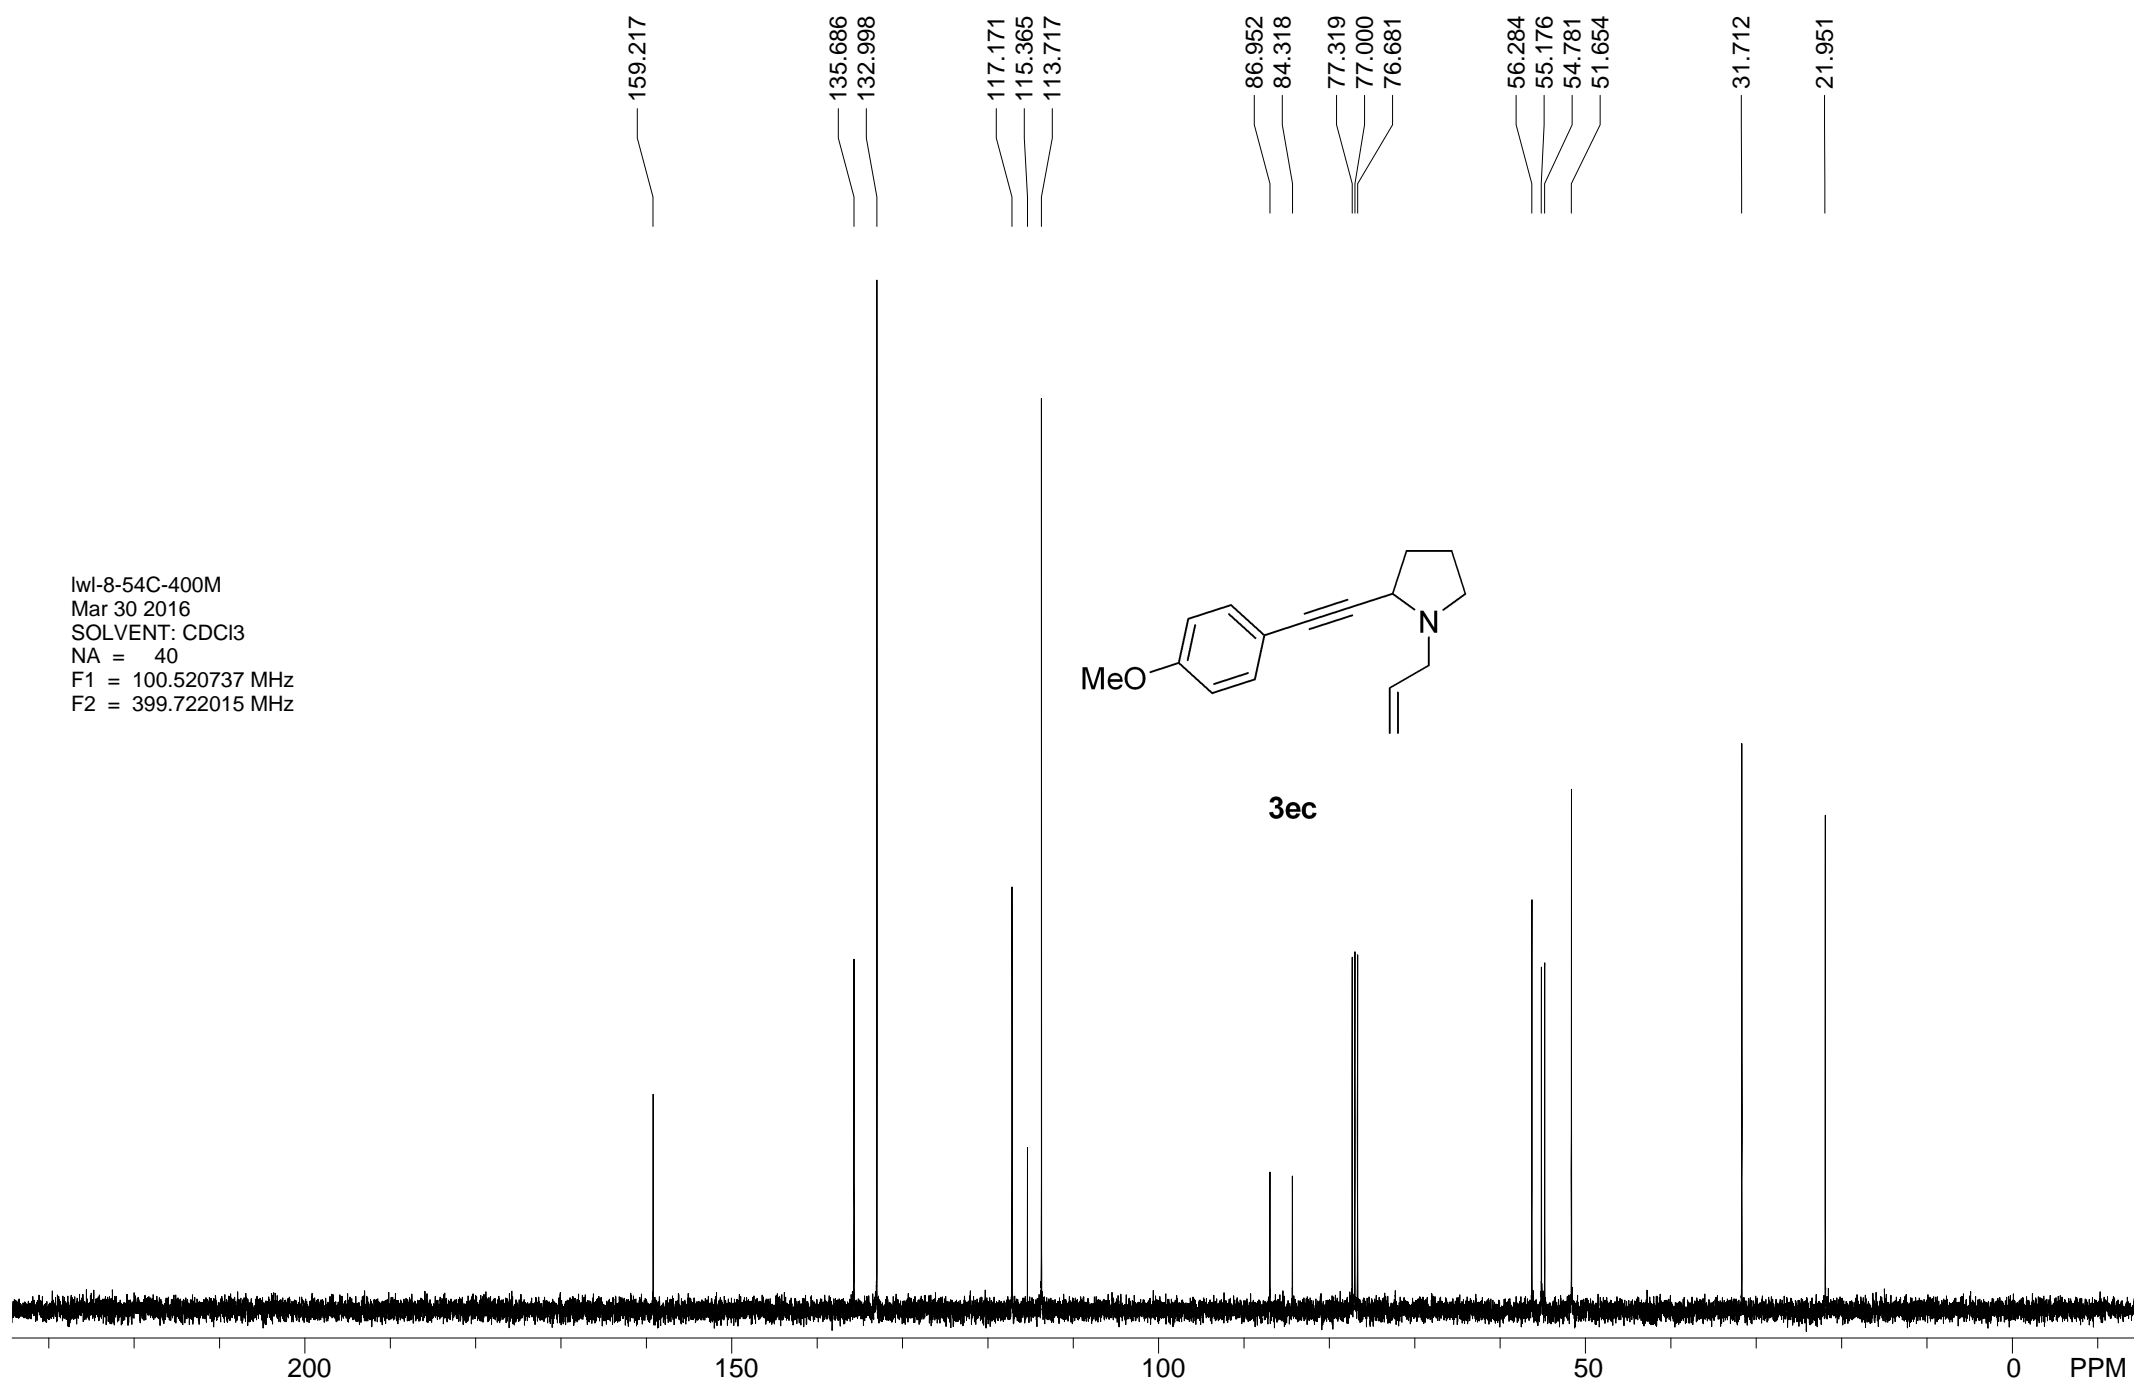

7.419  
7.406  
7.397  
7.384  
7.273  
7.005  
6.983  
6.962  
  
6.016  
6.002  
5.997  
5.991  
5.983  
5.976  
5.973  
5.958  
5.955  
5.948  
5.940  
5.934  
5.929  
5.915  
5.275  
5.272  
5.233  
5.230  
5.145  
5.120  
3.584  
3.570  
3.562  
3.548  
3.544  
3.537  
3.530  
3.066  
3.048  
3.034  
3.015  
2.893  
2.880  
2.870  
2.858  
2.848  
2.836  
2.518  
2.501  
2.496  
2.480  
2.473  
2.458  
2.228  
2.197  
2.182  
2.140  
2.056  
2.043  
2.017  
1.986  
1.974  
1.957  
1.942  
1.920  
1.895  
1.880  
1.854  
1.829  
1.808  
1.798  
1.777  
-0.000

lwl-8-55H-400M  
Mar 29 2016  
SOLVENT: CDCl3  
NA = 8  
F1 = 400.031677 MHz  
F2 = 100.596855 MHz

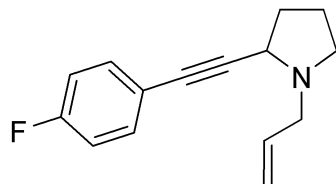

**3ed**

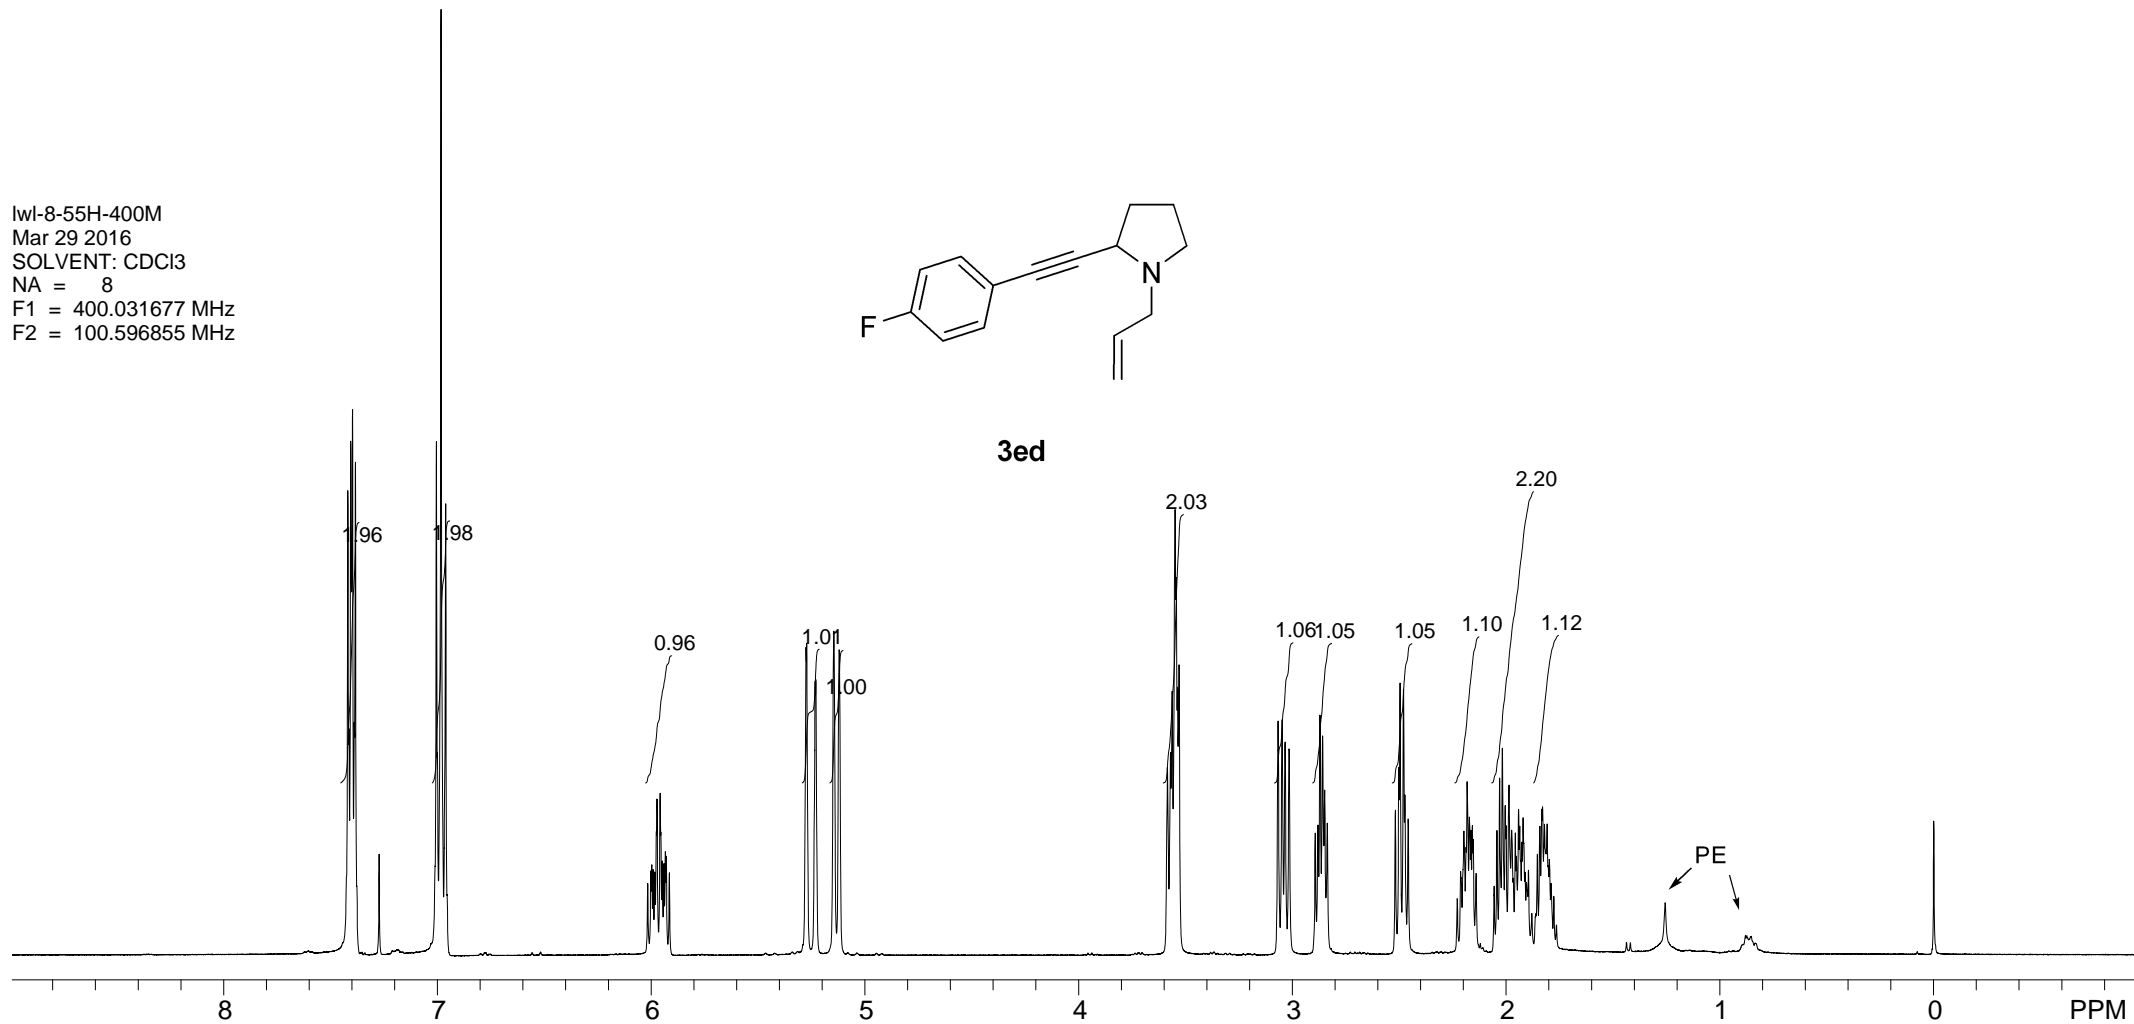



lwl-8-55C-400M  
Mar 29 2016  
SOLVENT: CDCl3  
NA = 64  
F1 = 100.597885 MHz  
F2 = 400.030792 MHz

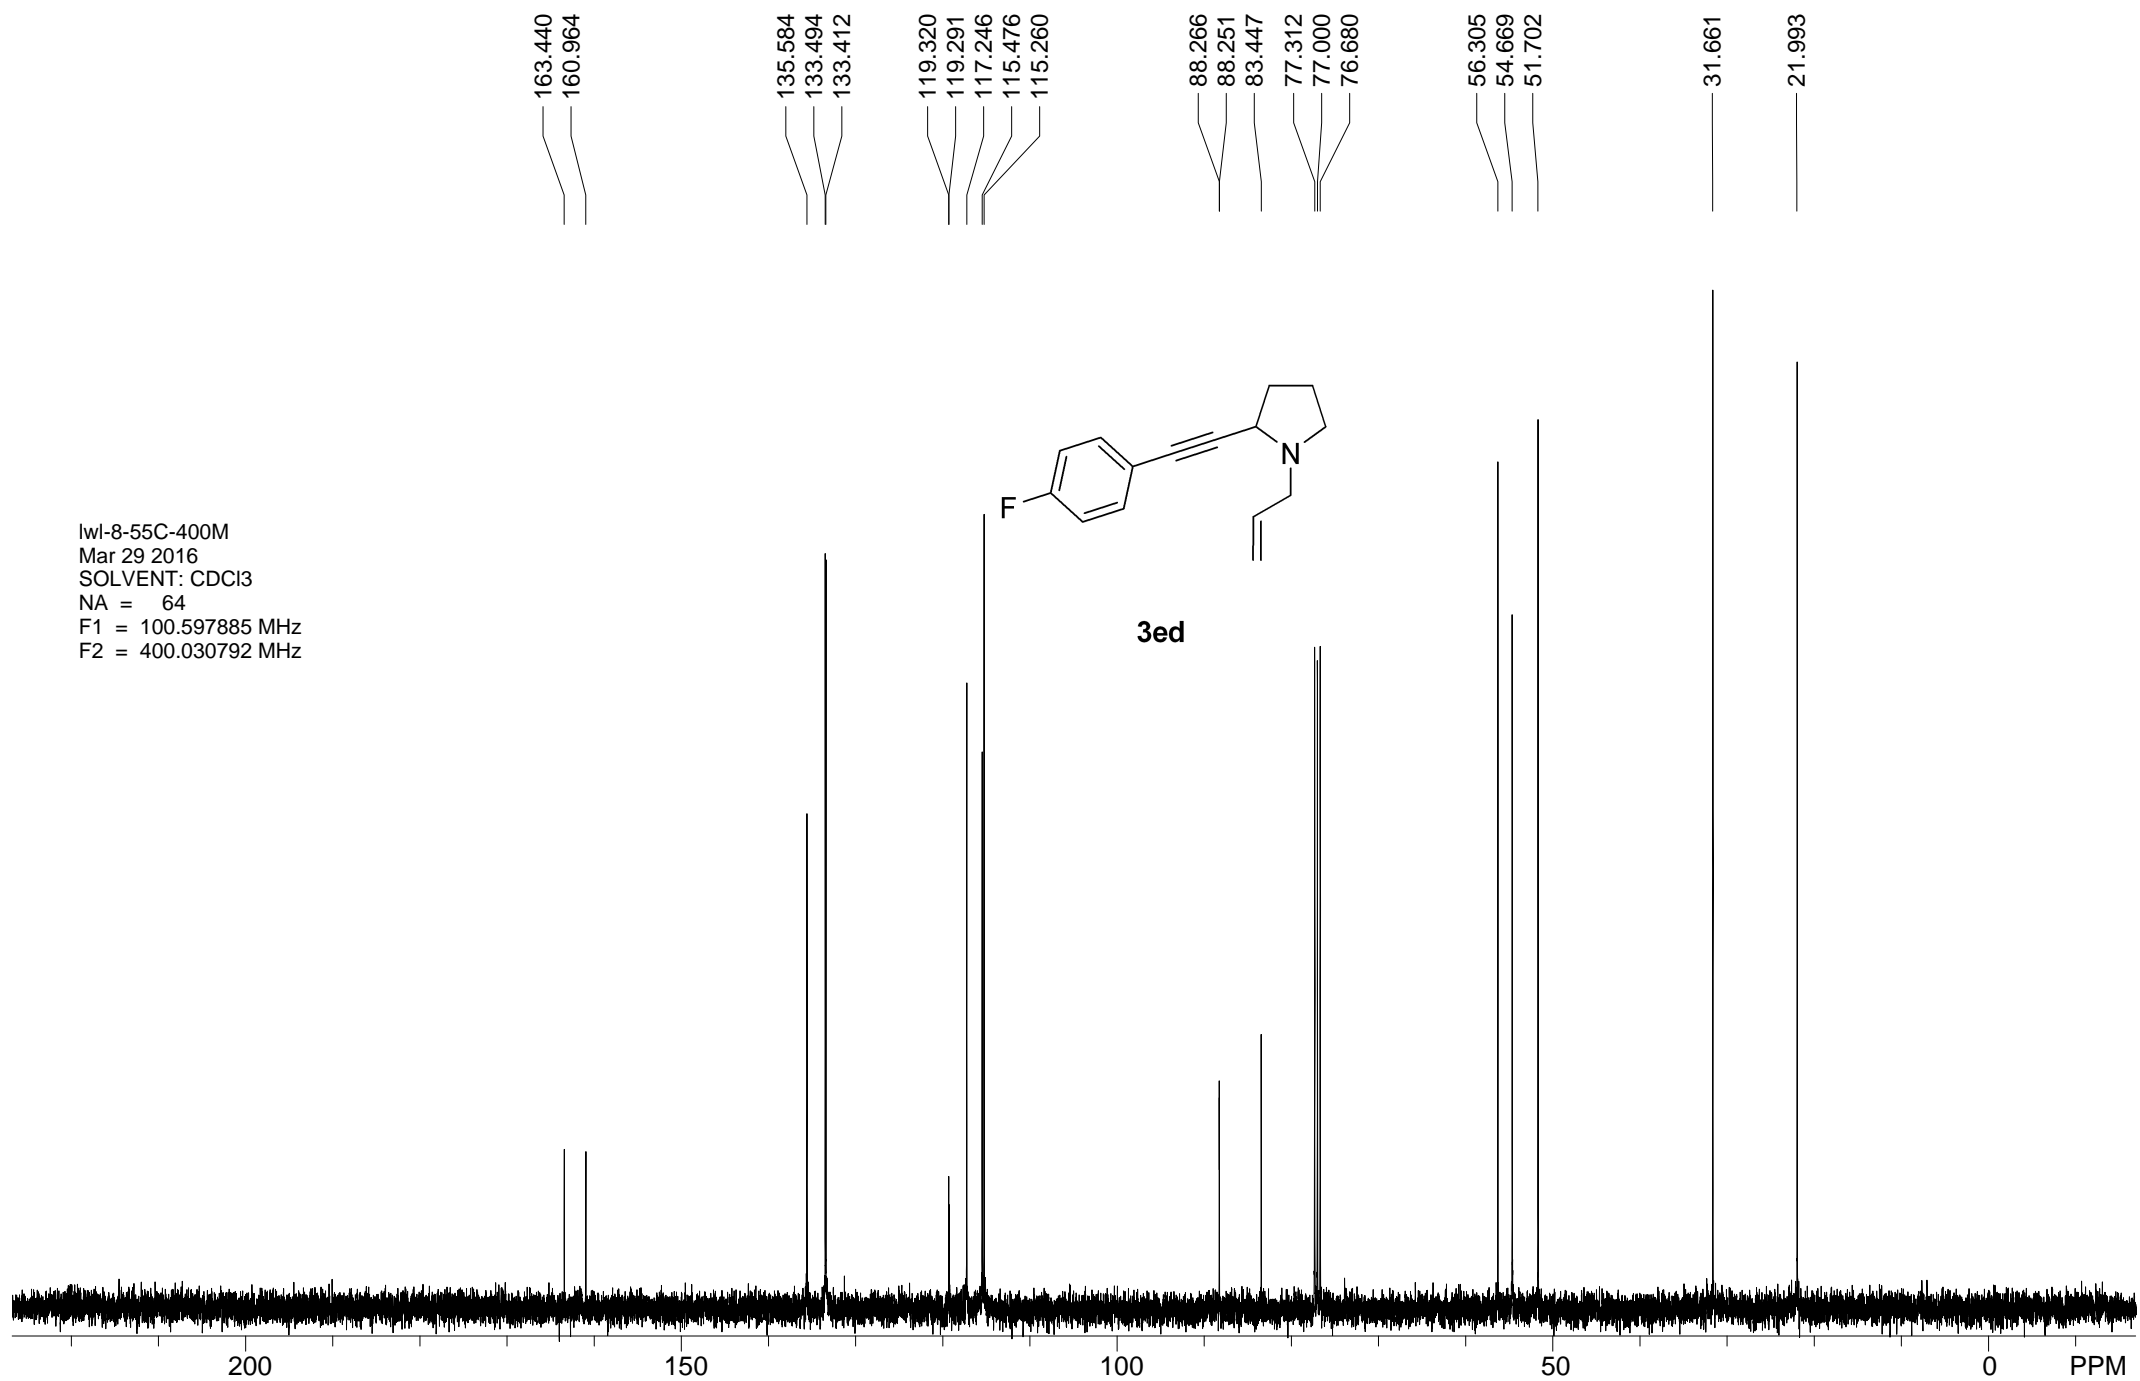

lwl-8-55F-400M  
Apr 6 2016  
SOLVENT: CDCl3  
NA = 8  
F1 = 376.076111 MHz  
F2 = 100.519203 MHz

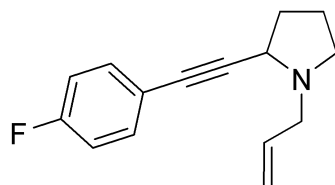

**3ed**

0.000

-112.078

50

0

-50

-100

-150

-200

-250

PPM

lwl-8-56H-400M  
Mar 29 2016  
SOLVENT: CDCl3  
NA = 8  
F1 = 400.031677 MHz  
F2 = 100.596855 MHz

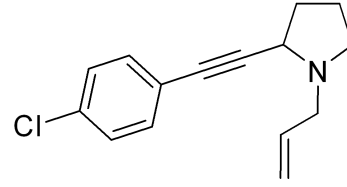

3ee

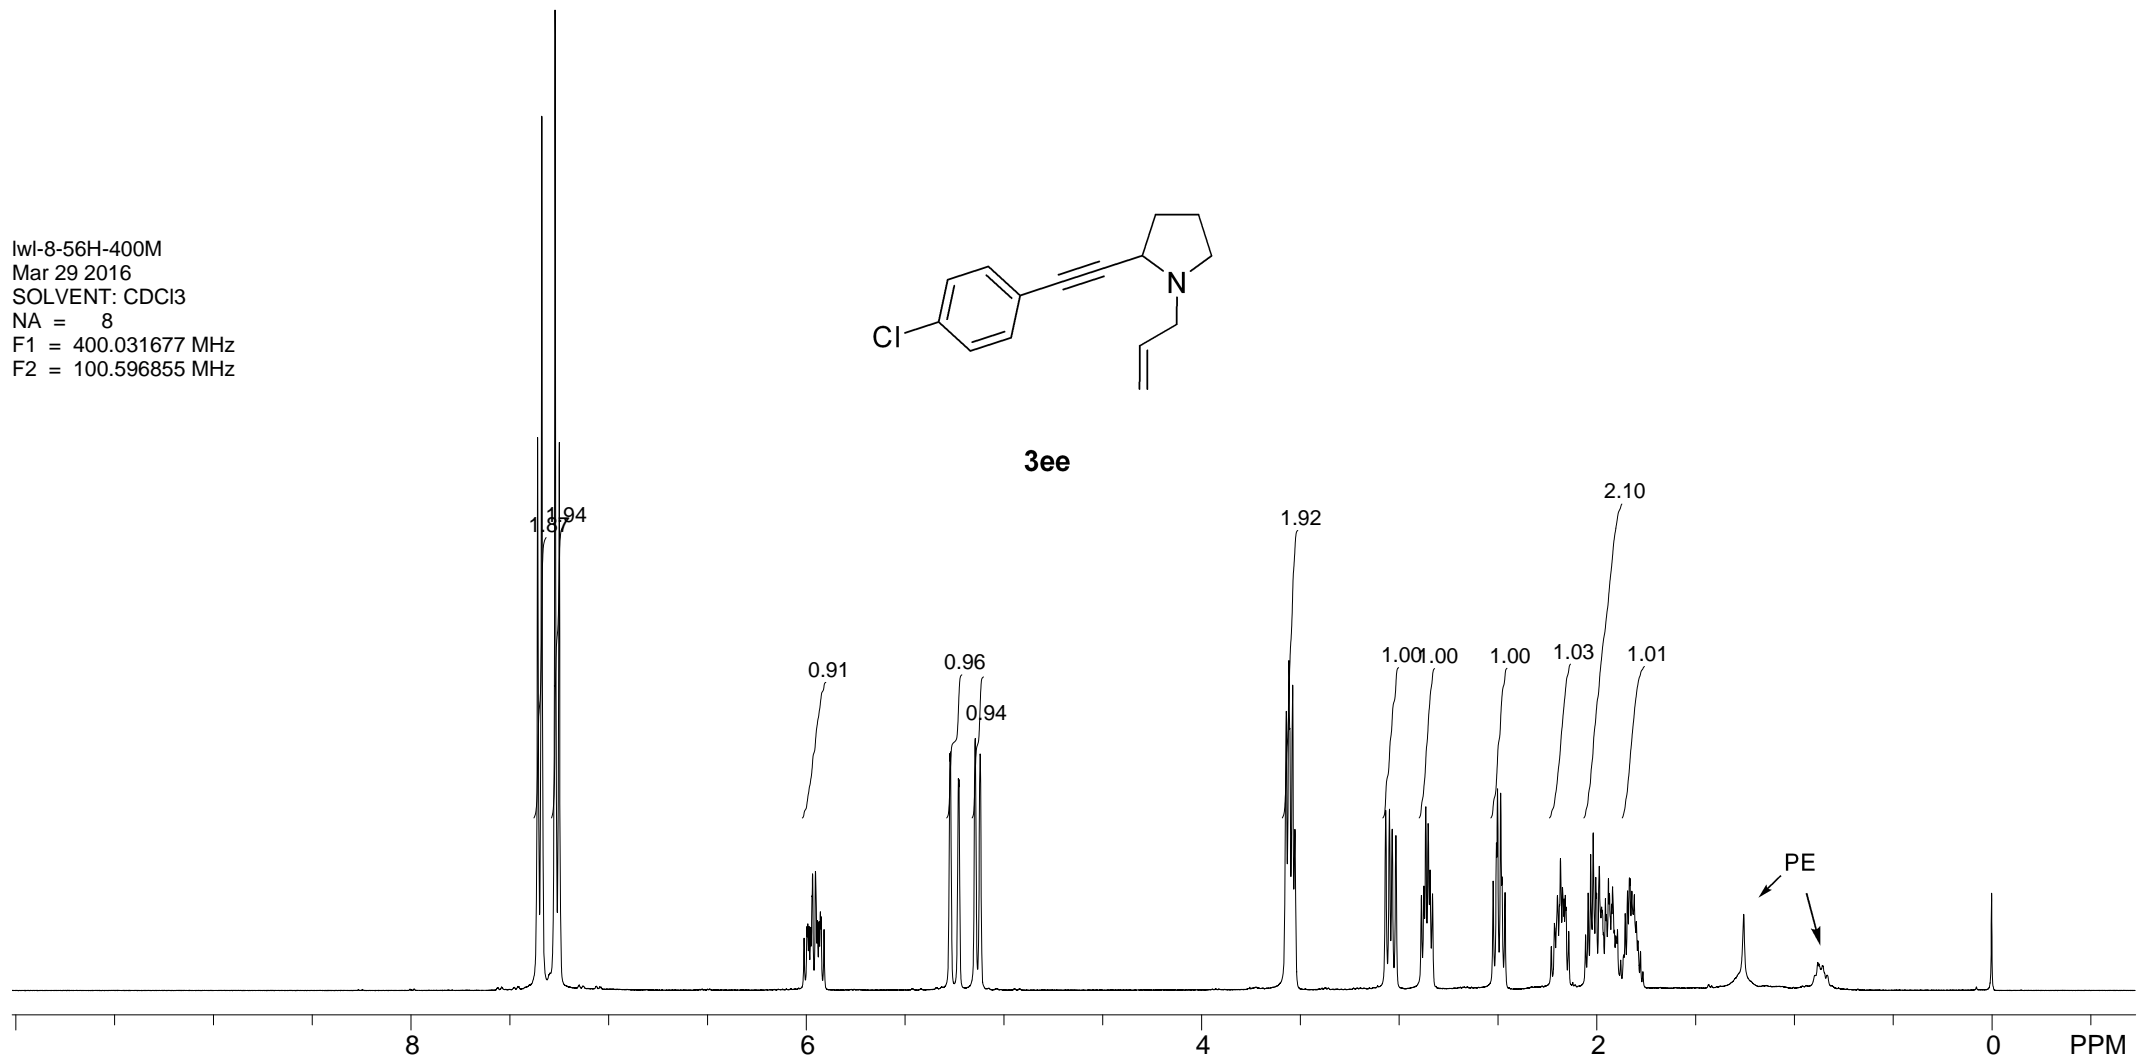

lwl-8-56C-400M  
Mar 29 2016  
SOLVENT: CDCl3  
NA = 64  
F1 = 100.597885 MHz  
F2 = 400.030792 MHz

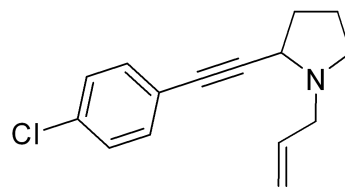

3ee

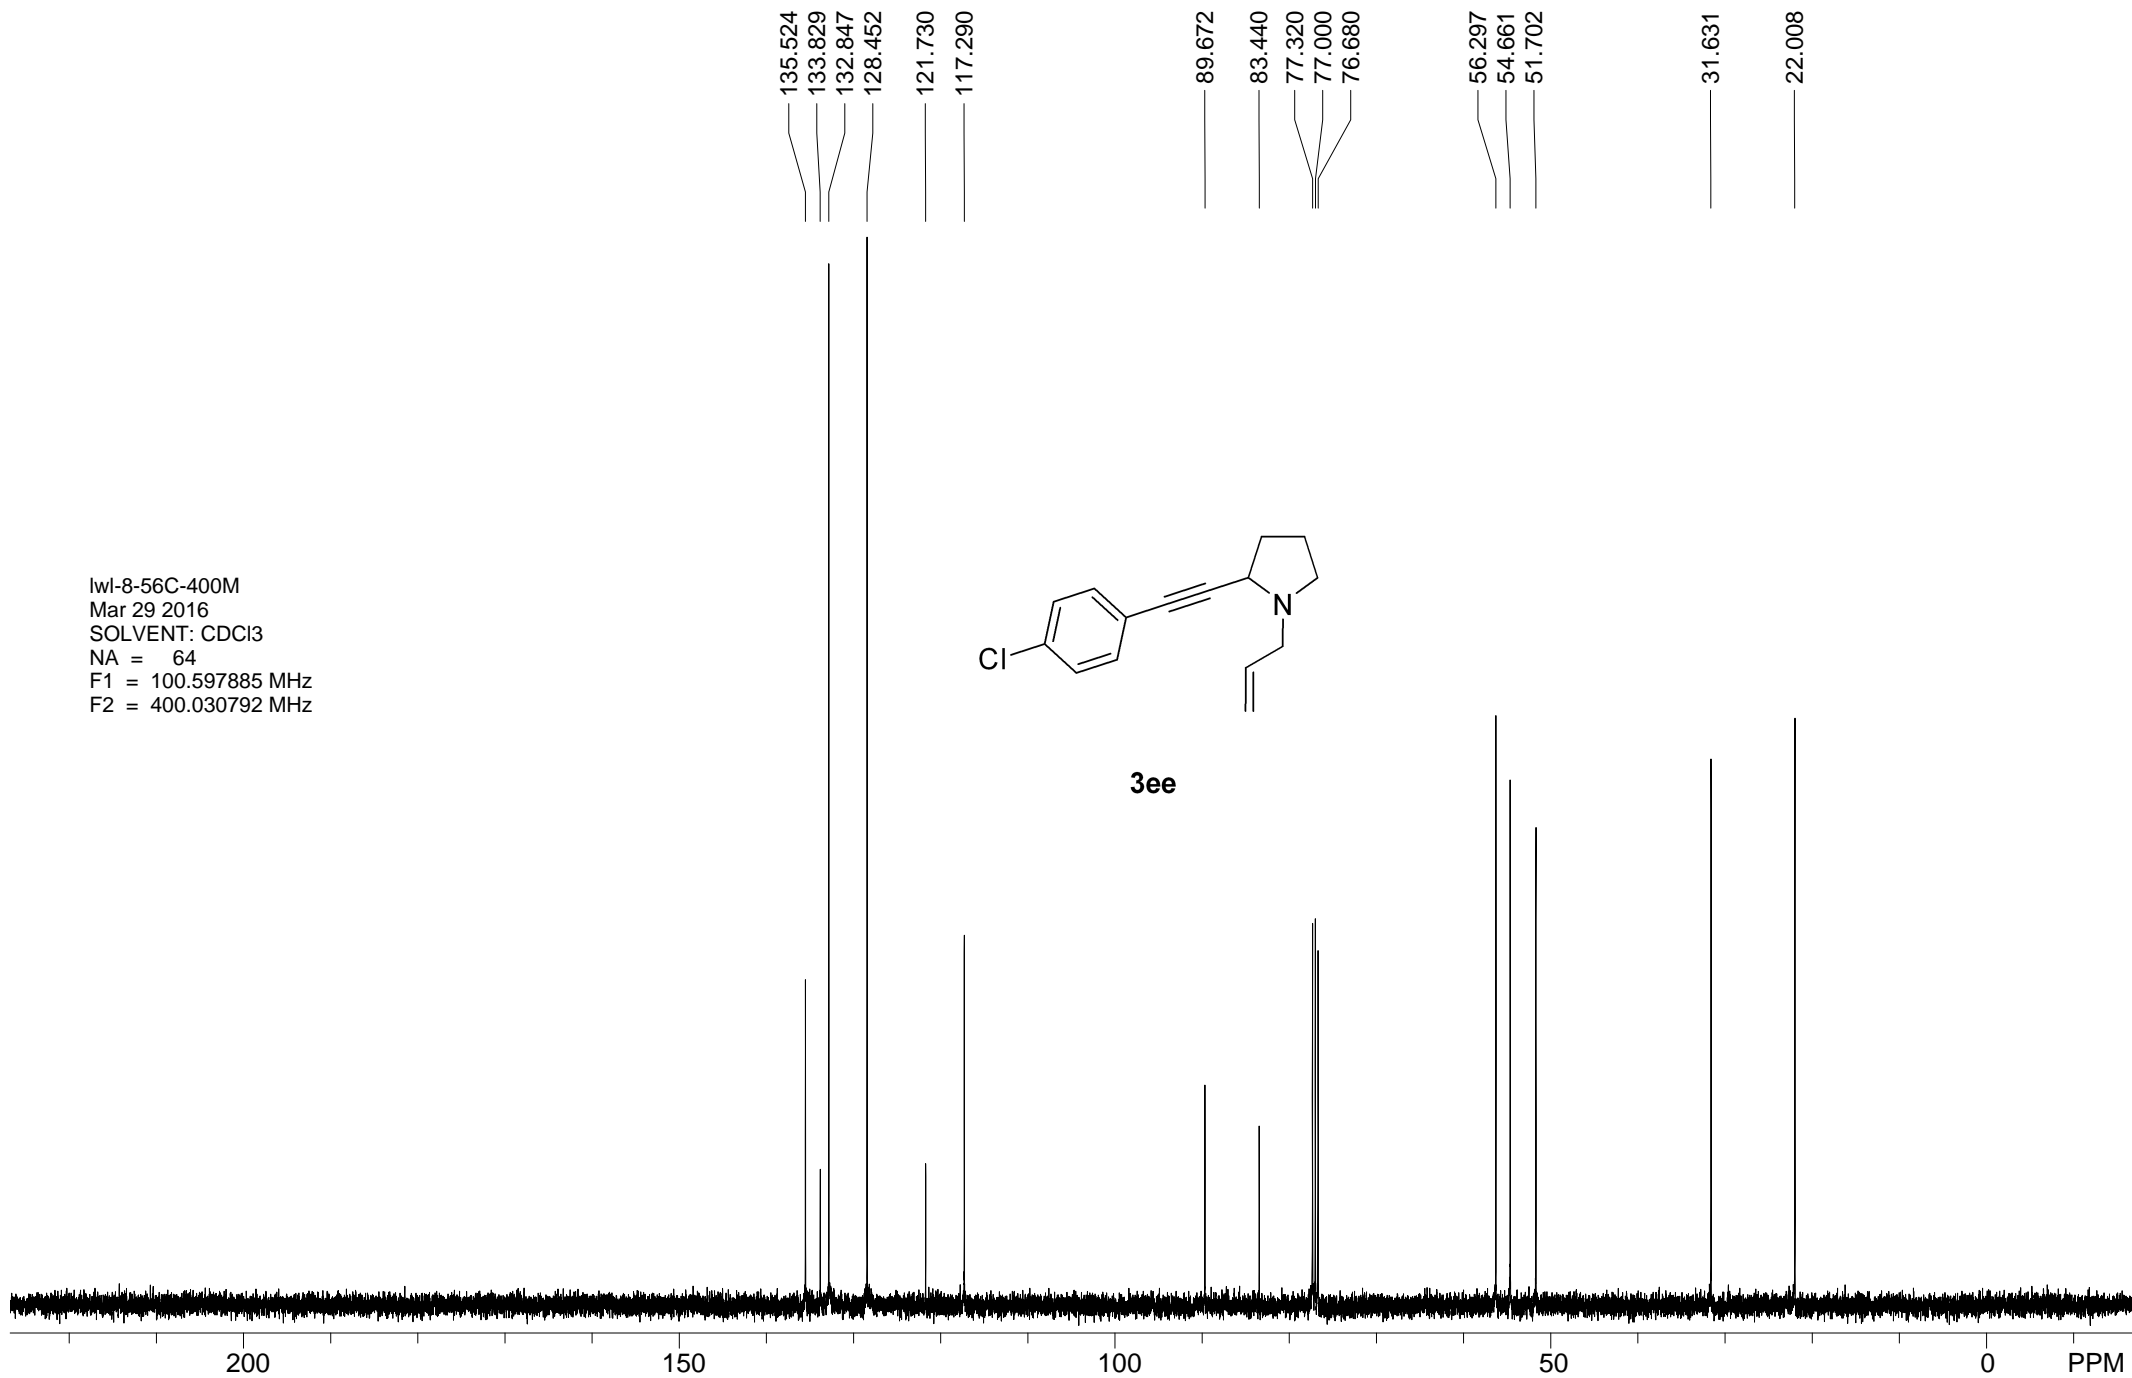

cyf-2-103-h  
Oct 27 2018  
SOLVENT: CDCl3  
NA = 8  
F1 = 399.723022 MHz  
F2 = 100.519203 MHz

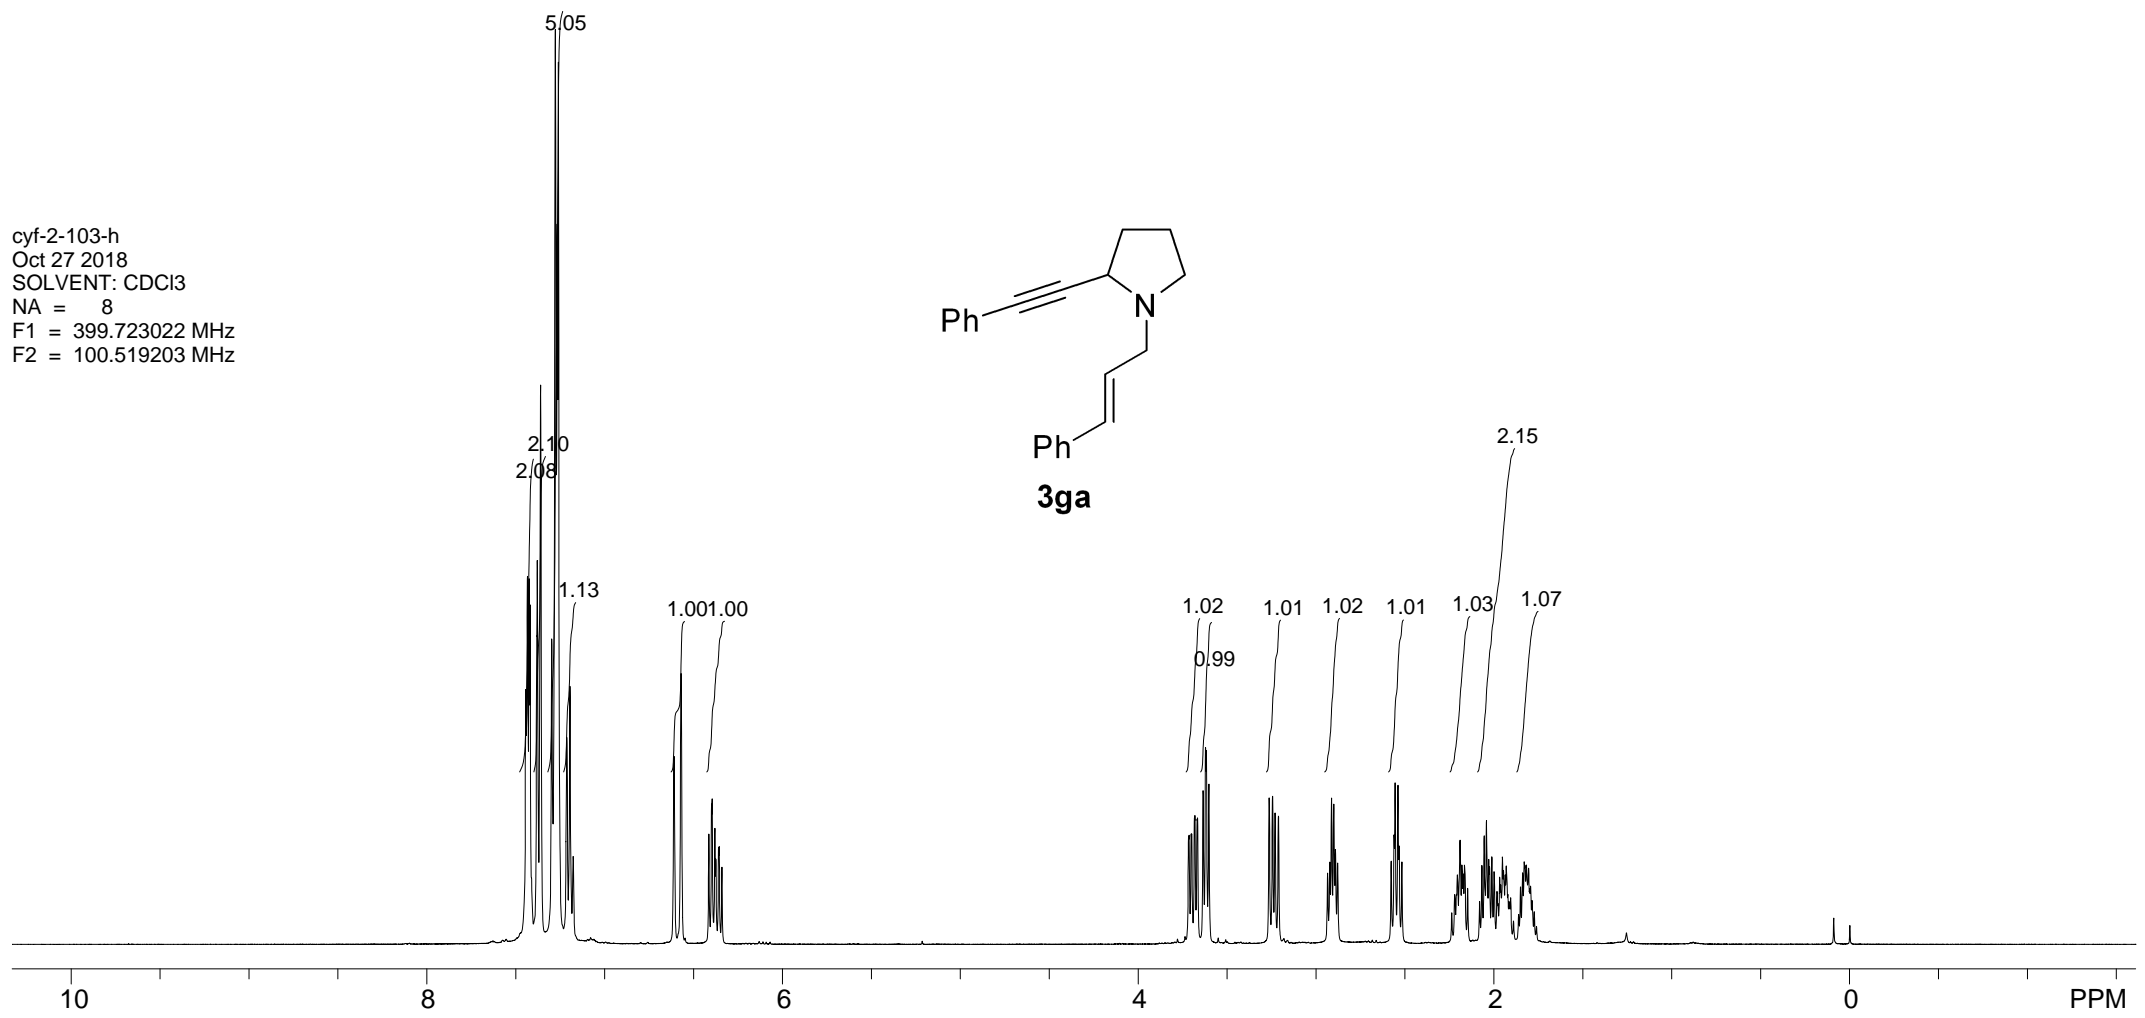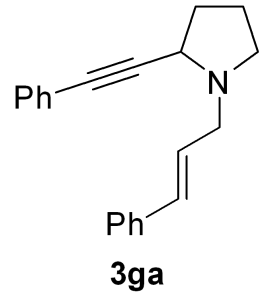

cyf-2-103-c-agilent  
Oct 27 2018  
SOLVENT: CDCl3  
NA = 160  
F1 = 100.520737 MHz  
F2 = 399.722015 MHz

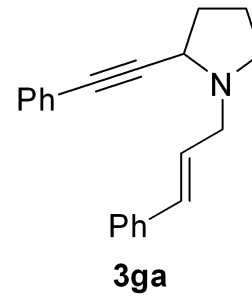

137.195  
132.359  
131.775  
128.572  
128.268  
128.002  
127.410  
127.387  
126.393  
123.364

88.742  
84.848  
77.492  
77.173  
76.855

55.607  
54.856  
51.971

31.878  
22.169

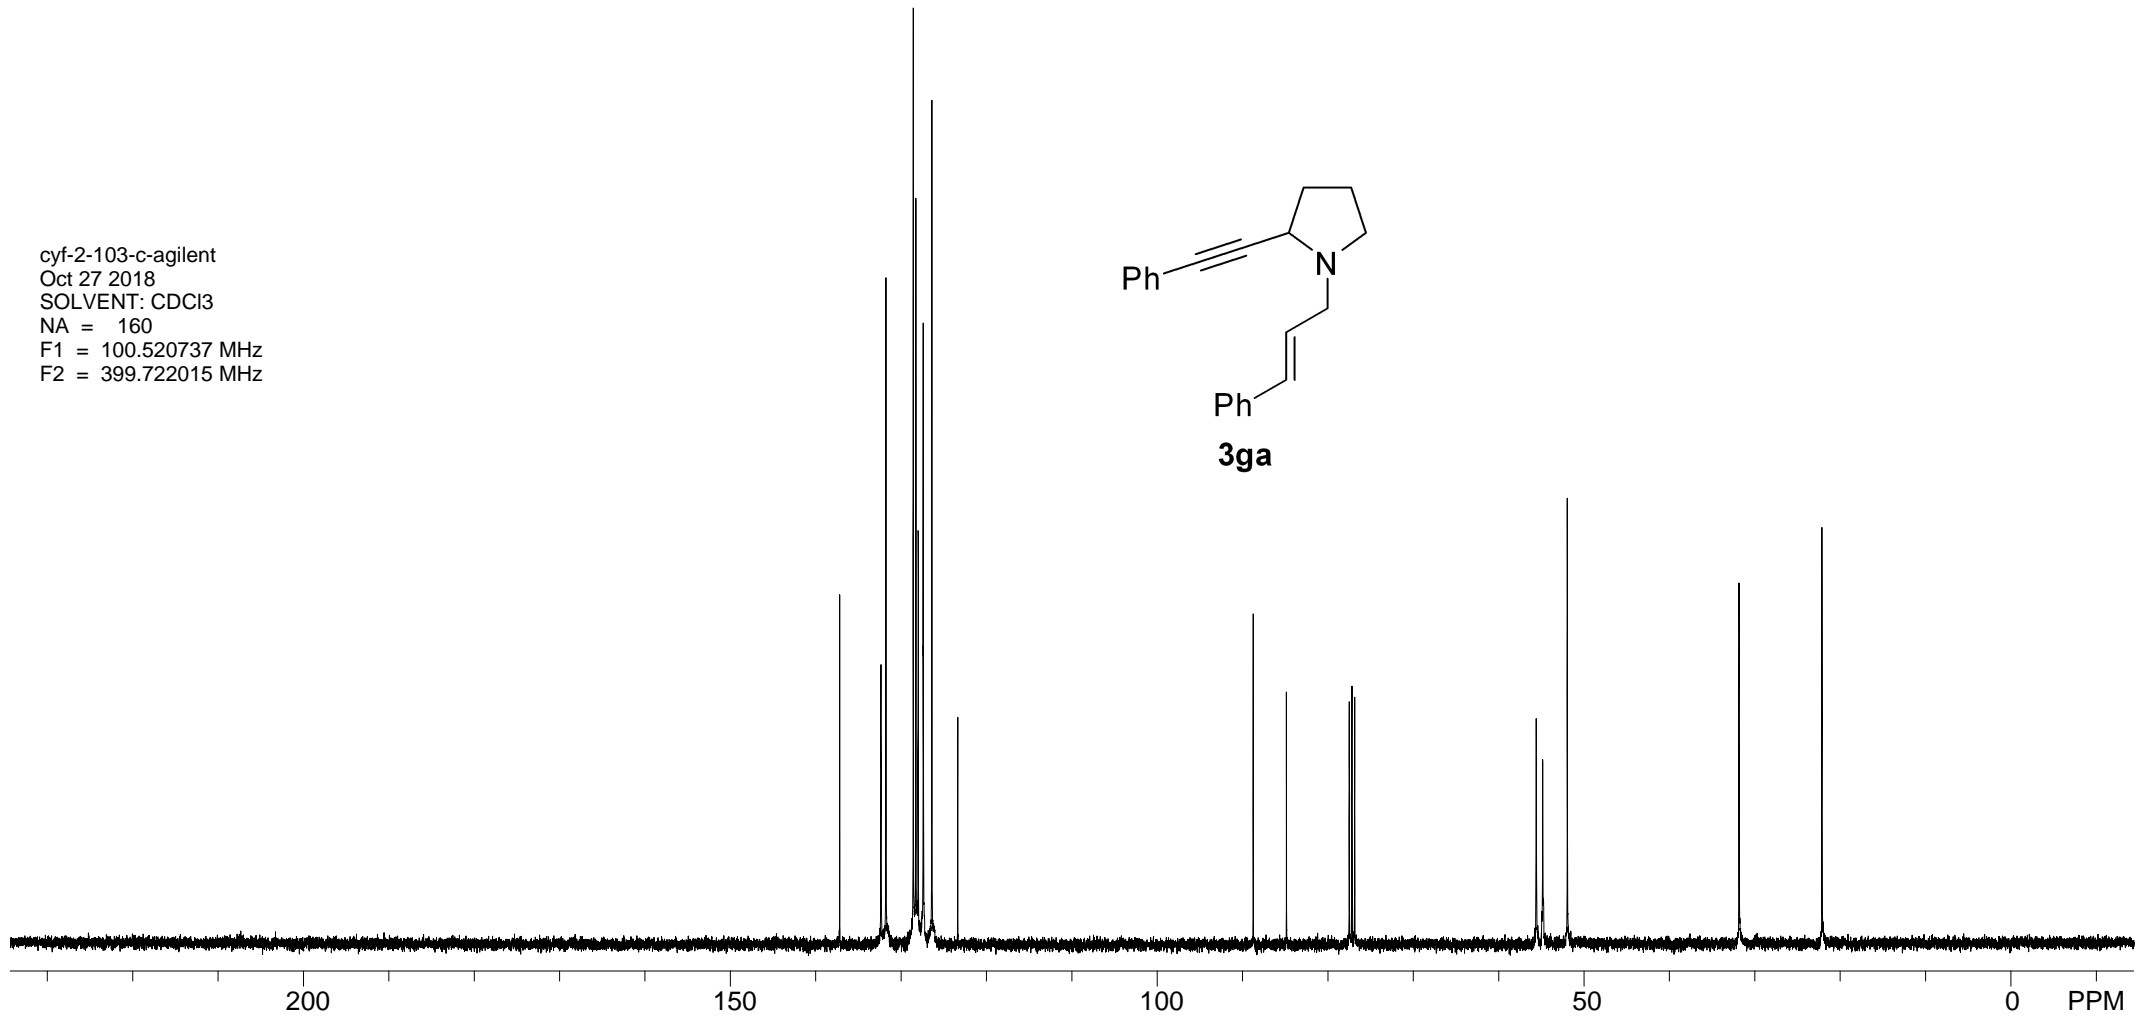

cyf-1-136-H400M  
Dec 28 2018  
Solvent : CDCl3  
NA = 8  
F1 = 399.722809 MHz  
F2 = 100.519203 MHz

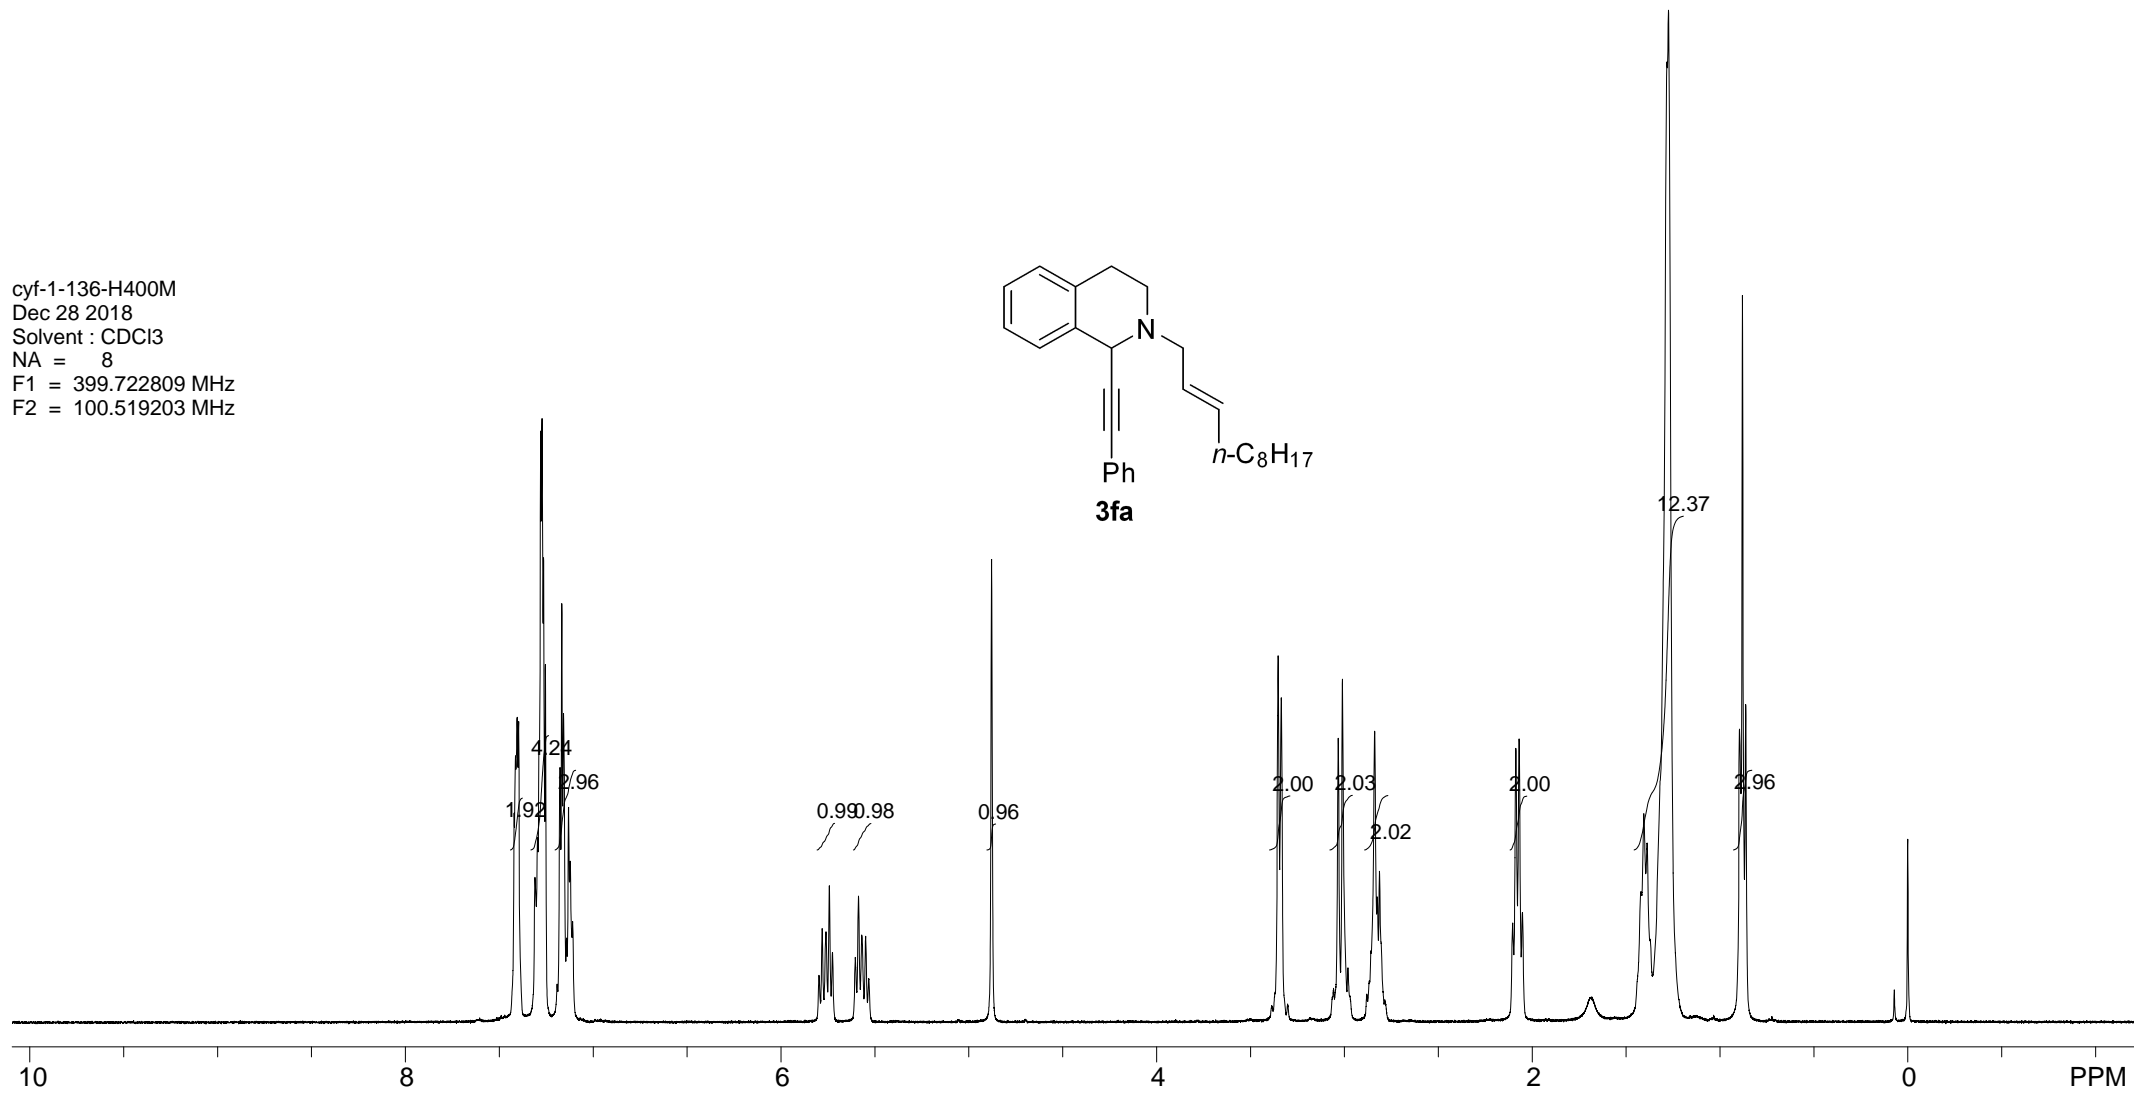

cyf-1-136-C100M-agilent.fid  
Dec 28 2018  
SOLVENT: CDCl3  
NA = 300  
F1 = 100.520737 MHz  
F2 = 399.722015 MHz

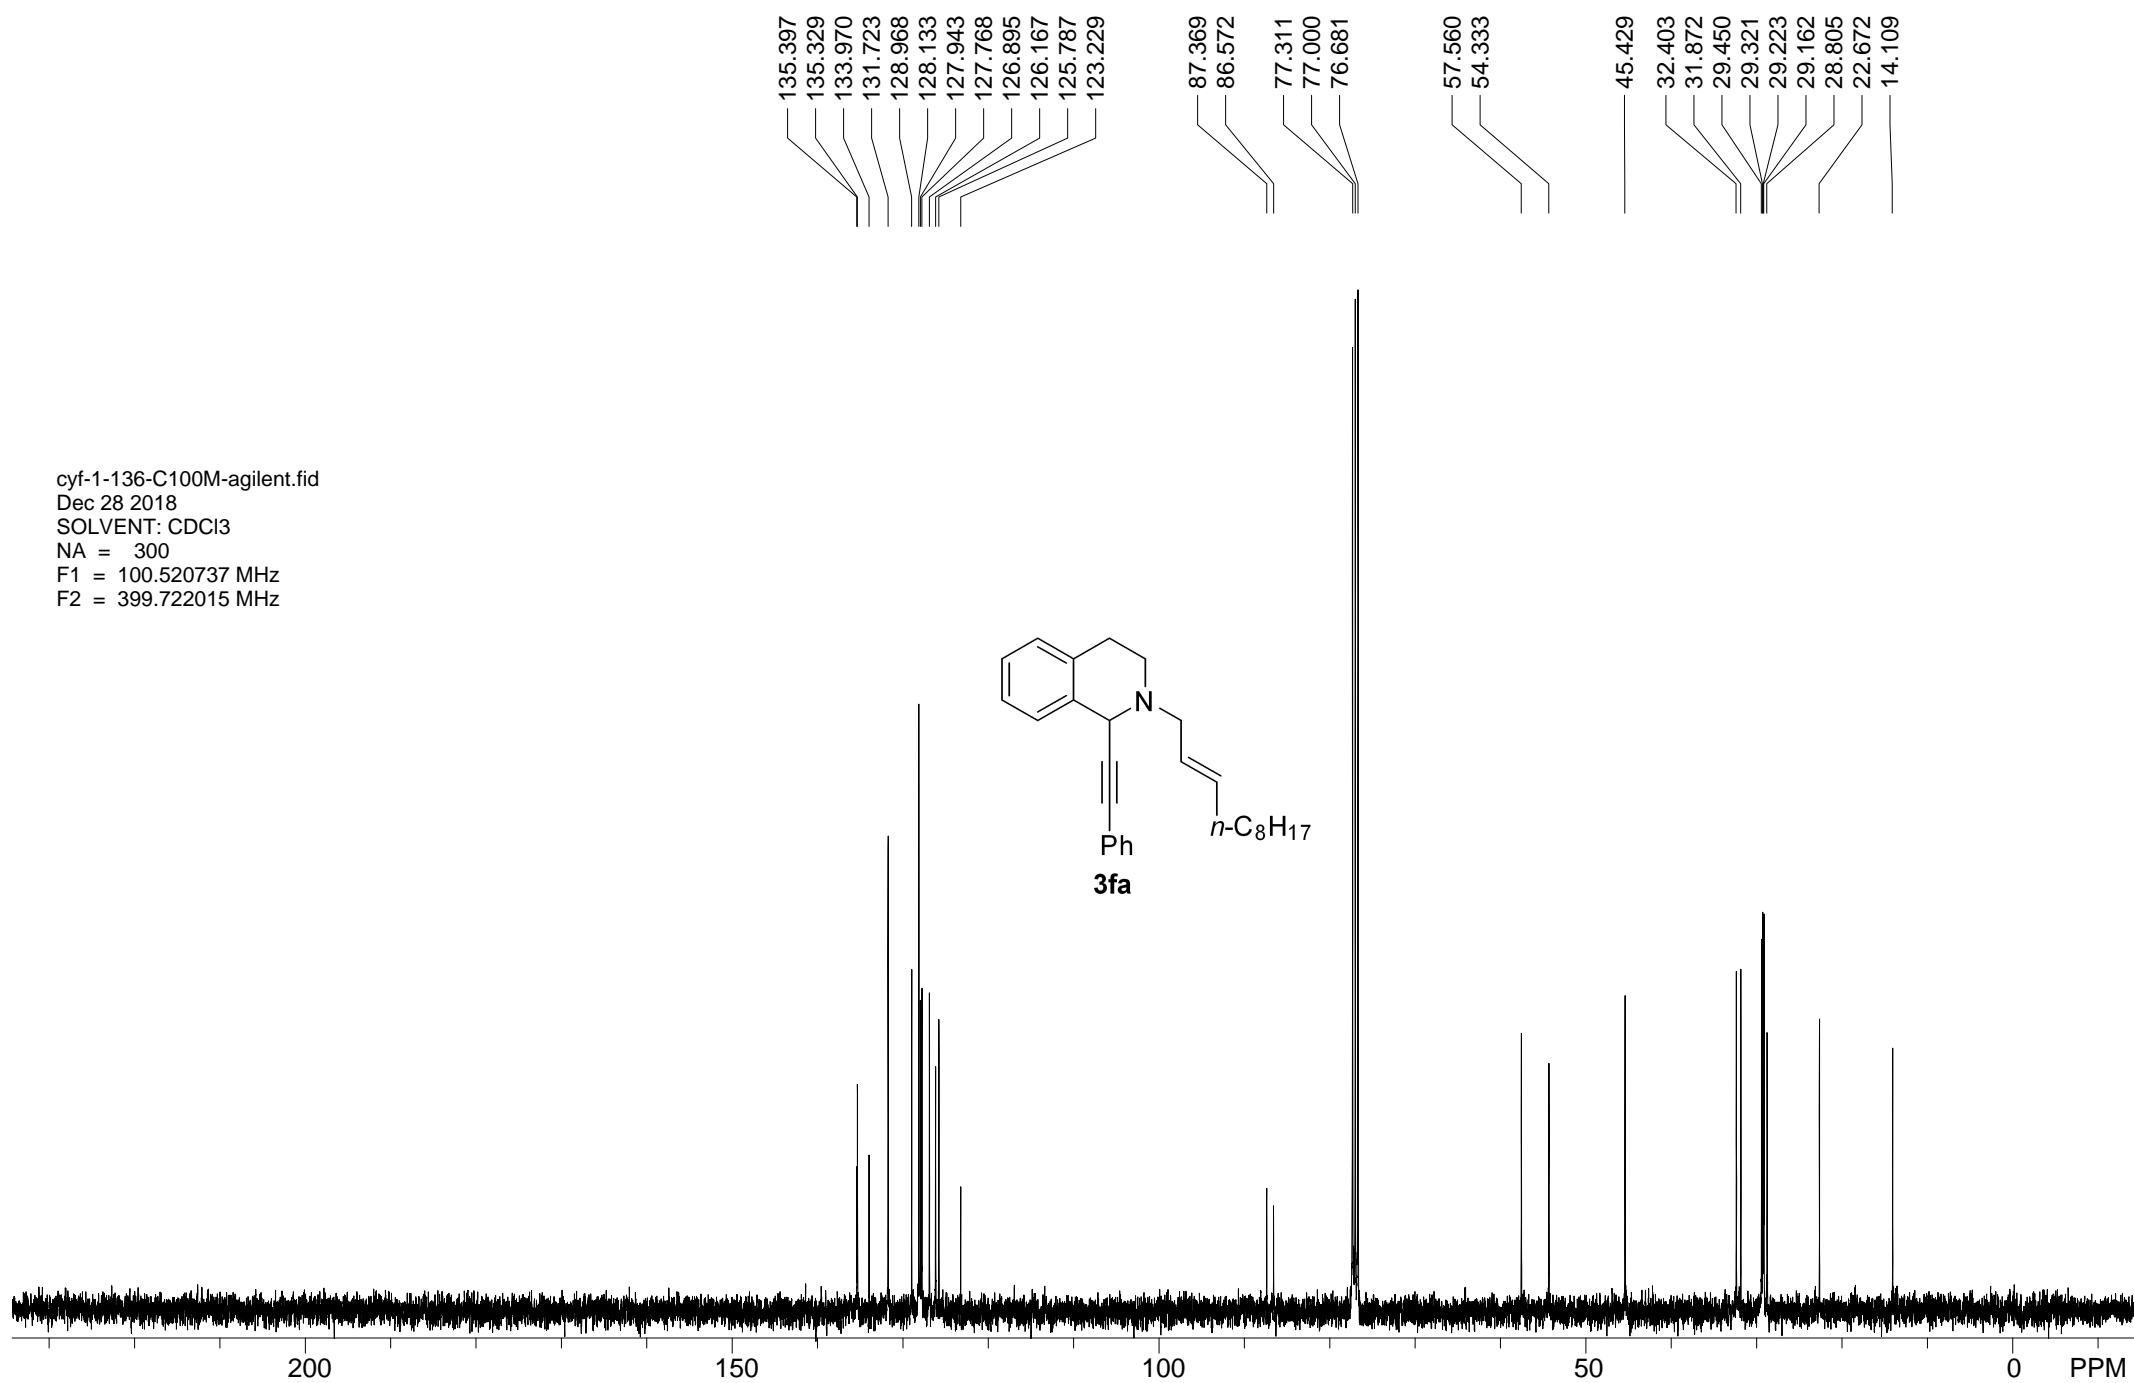



7.255  
7.243  
7.227  
7.220  
7.159  
7.154  
7.146  
7.137  
7.132  
7.118  
7.099  
7.091  
7.077  
5.759  
5.742  
5.721  
5.703  
5.687  
5.559  
5.543  
5.525  
5.505  
5.487  
4.646

3.312  
3.296  
3.279  
3.264  
3.254  
3.235  
3.222  
3.203  
2.988  
2.971  
2.940  
2.921  
2.897  
2.888  
2.809  
2.792  
2.769  
2.760  
2.740  
2.723  
2.094  
2.077  
2.059  
2.041  
1.417  
1.400  
1.383  
1.366  
1.286  
0.902  
0.885  
0.868  
0.150  
-0.000

cyf-1-137B-H400M  
Jan 2 2018  
SOLVENT: CDCl3  
NA = 8  
F1 = 399.722809 MHz  
F2 = 100.519203 MHz

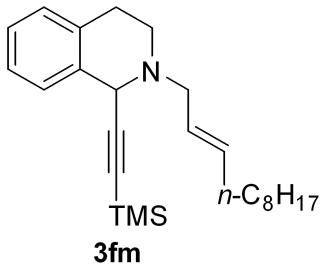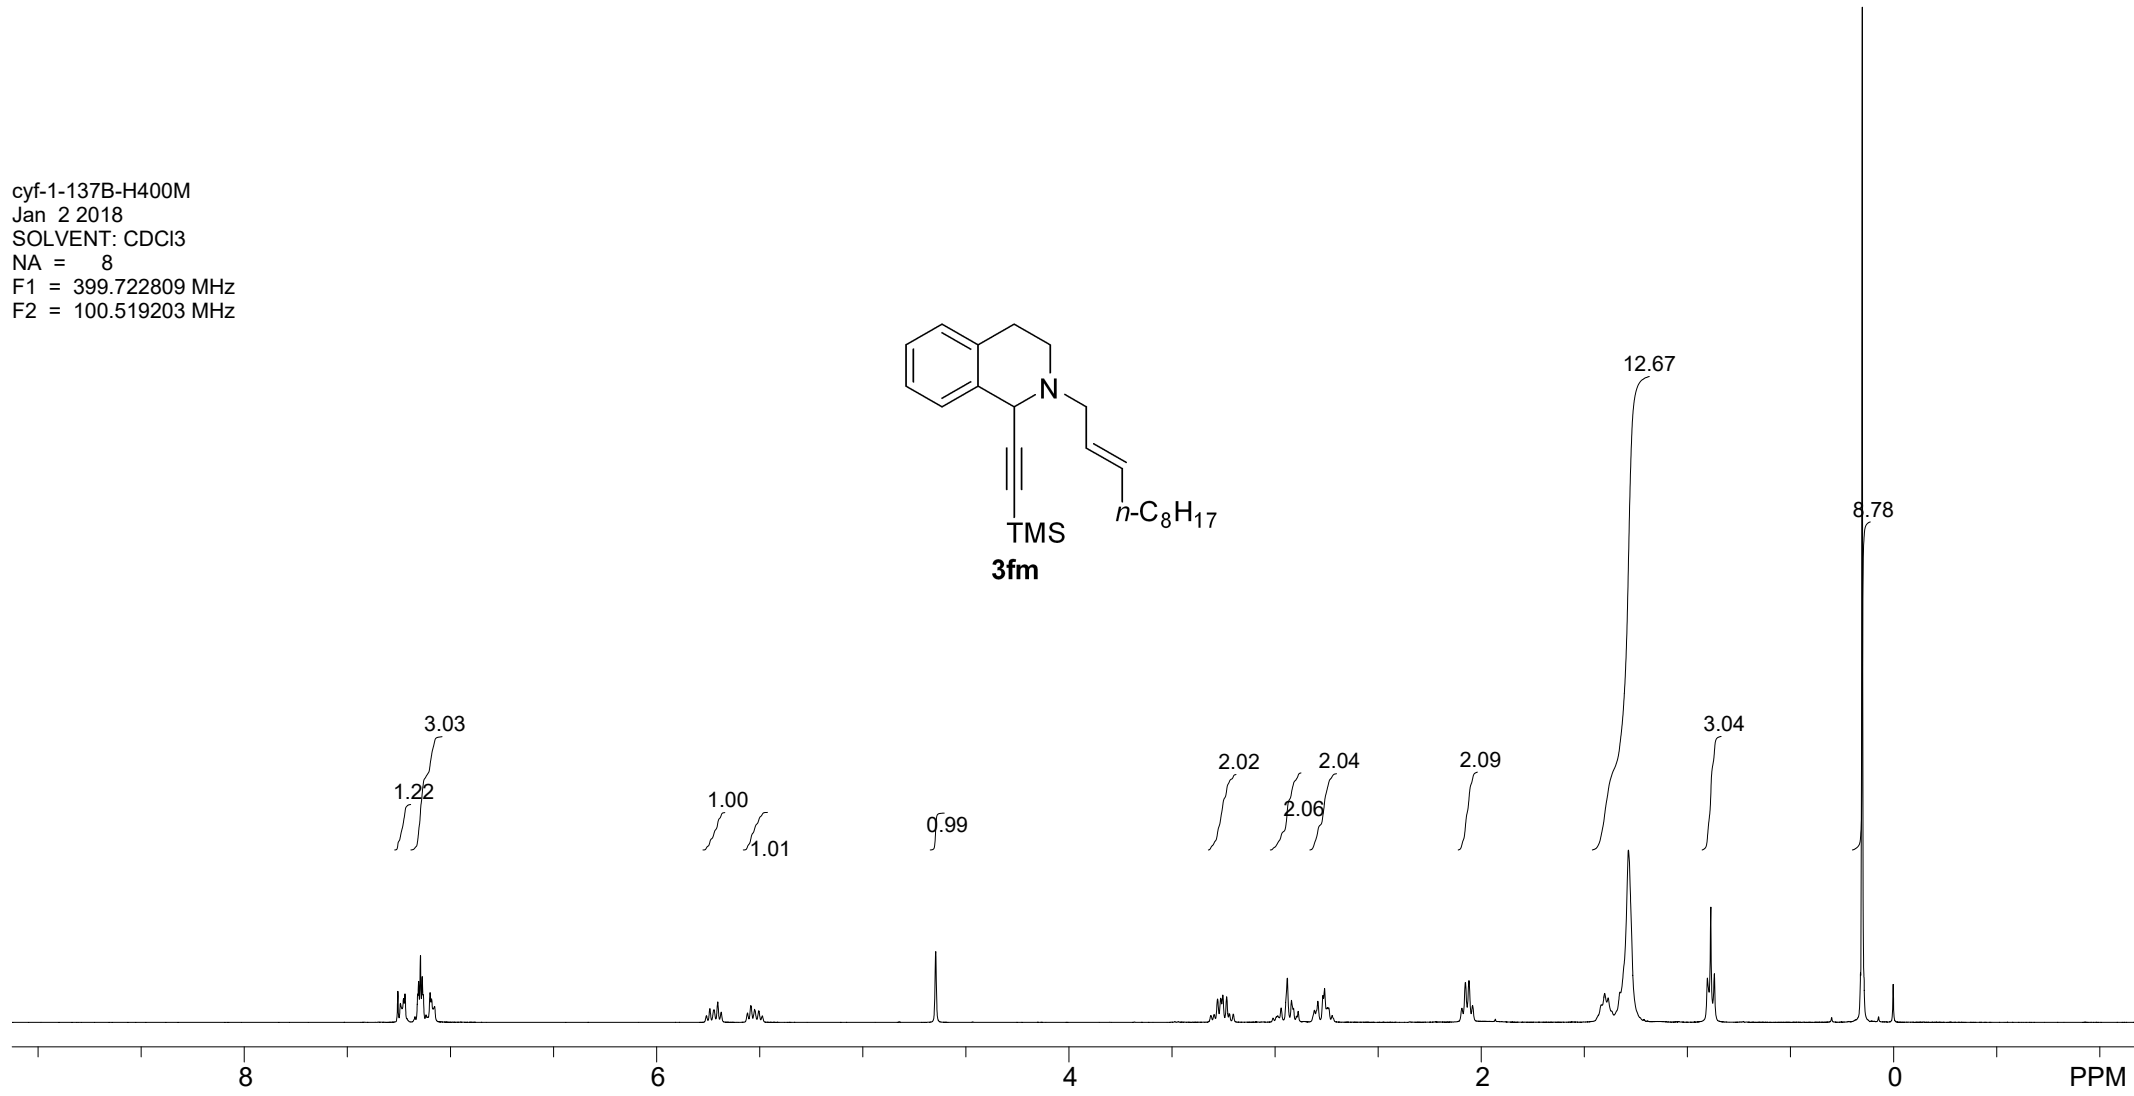

cyf-1-137B-C100M-Varian  
Jan 3 2018  
SOLVENT: CDCl3  
NA = 328  
F1 = 100.598389 MHz  
F2 = 400.030792 MHz

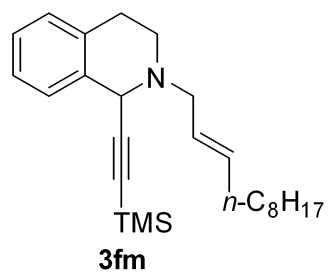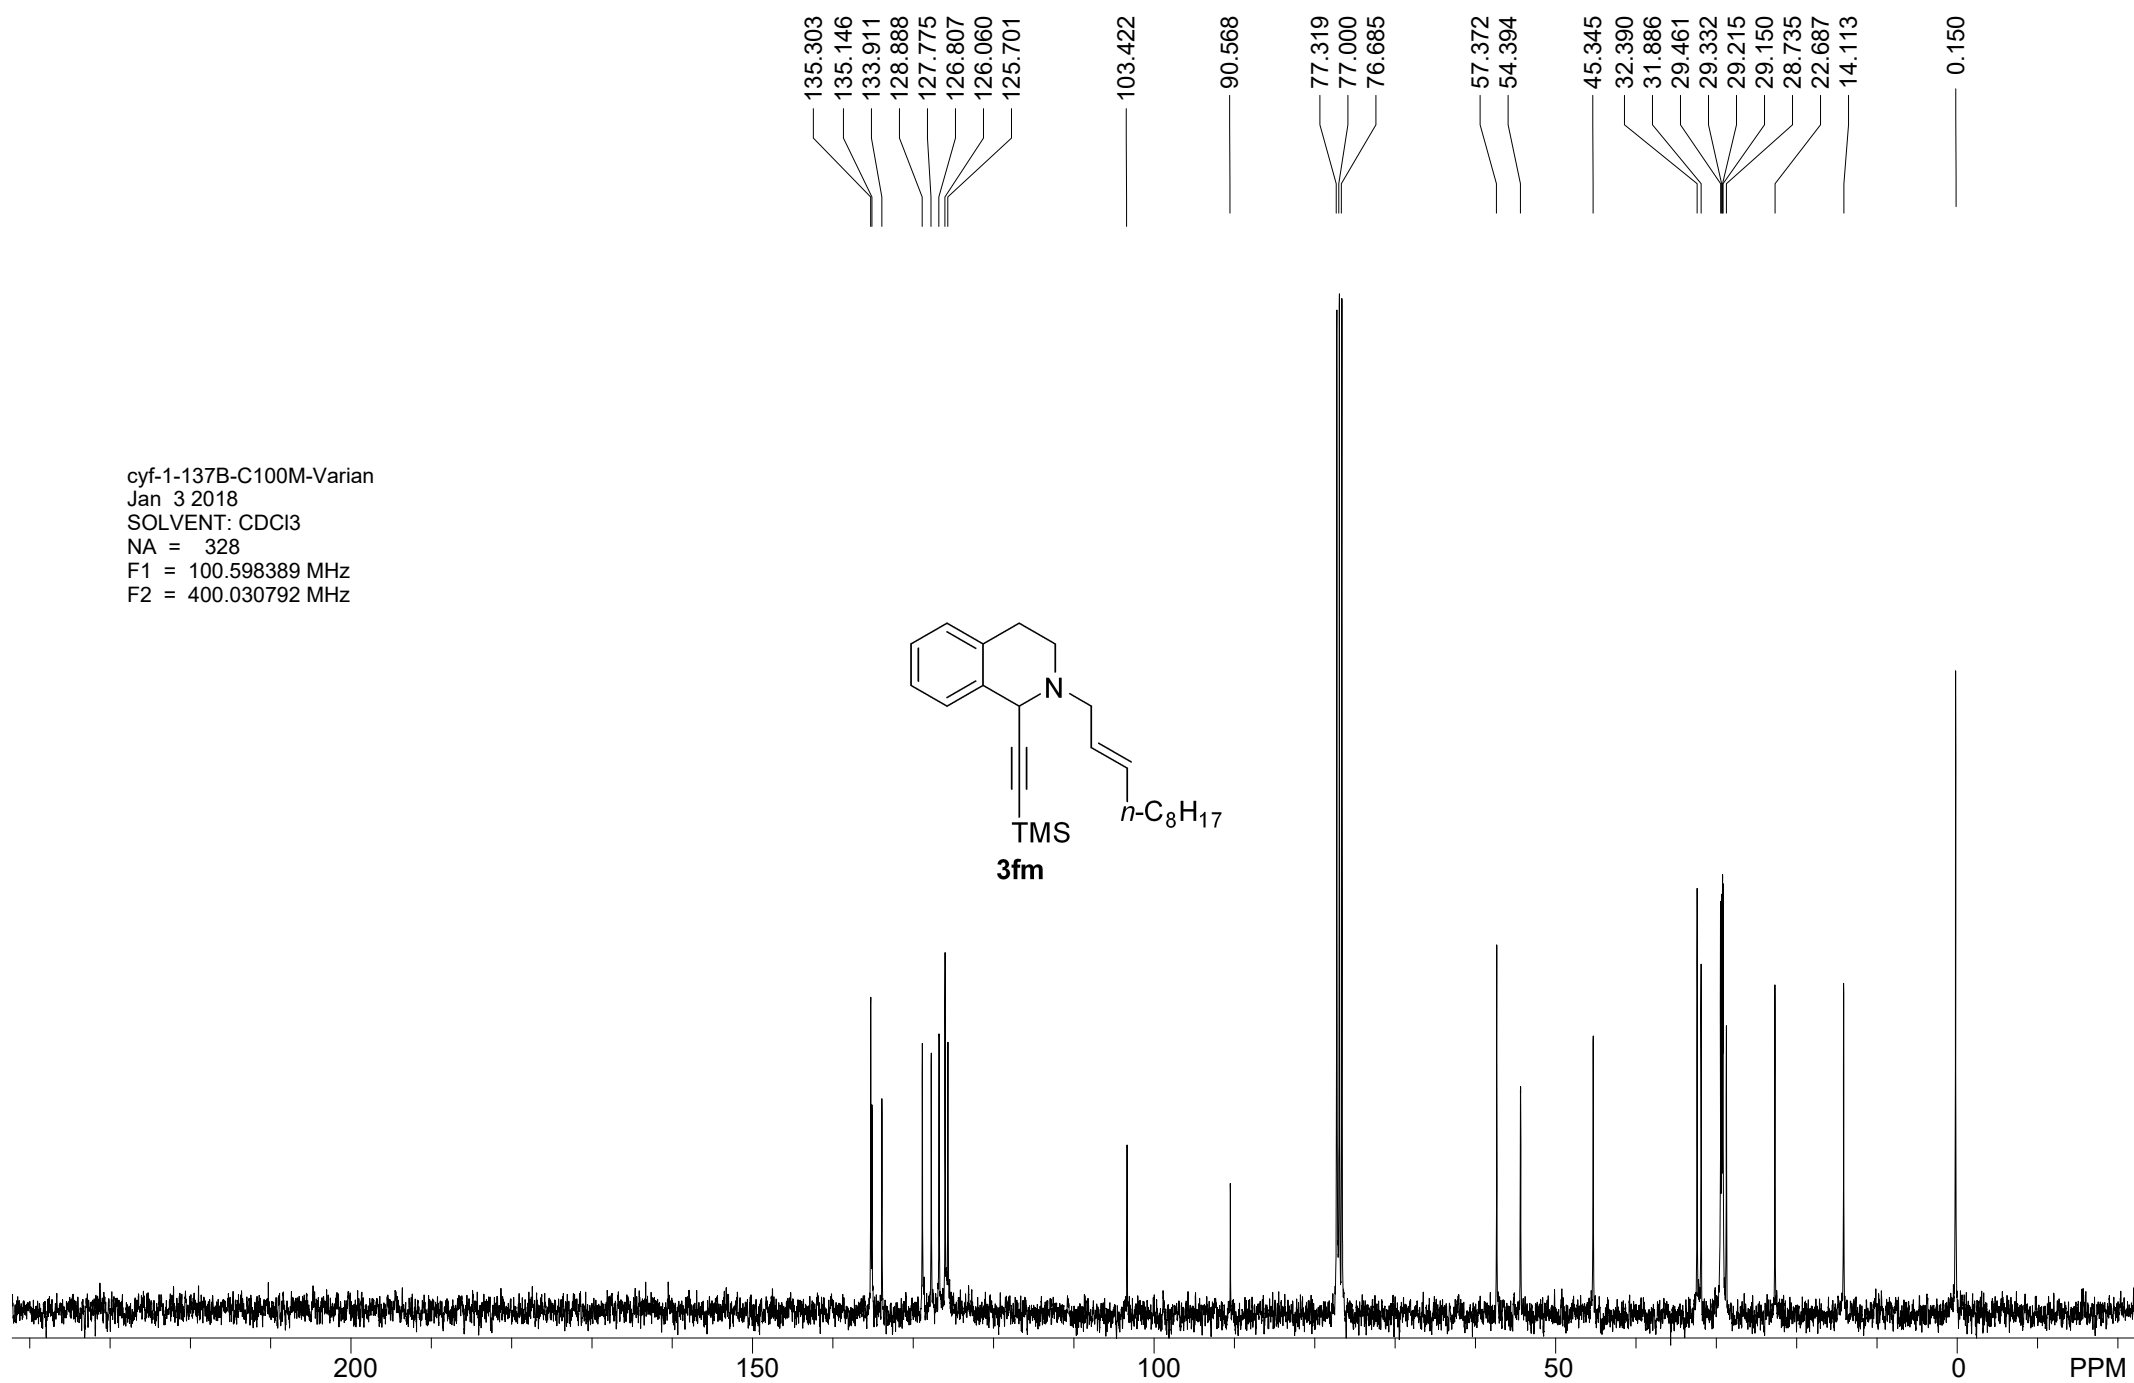

7.257  
7.235  
7.223  
7.213  
7.202  
7.156  
7.145  
7.133  
7.123  
7.111  
7.100  
7.090  
7.081  
7.067  
5.746  
5.729  
5.708  
5.691  
5.674  
5.569  
5.553  
5.535  
5.513  
5.497  
4.616

3.311  
3.295  
3.278  
3.263  
3.244  
3.226  
3.211  
3.193  
3.193  
2.976  
2.962  
2.952  
2.932  
2.902  
2.799  
2.792  
2.762  
2.740  
2.714  
2.216  
2.212  
2.199  
2.195  
2.182  
2.178  
2.089  
2.073  
2.055  
2.038  
1.501  
1.481  
1.464  
1.447  
1.430  
1.412  
1.394  
1.378  
1.282  
0.917  
0.899  
0.884  
0.867  
-0.000

cyf-1-137A-H400M  
Jan 2 2018  
SOLVENT: CDCl3  
NA = 8  
F1 = 399.722809 MHz  
F2 = 100.519203 MHz

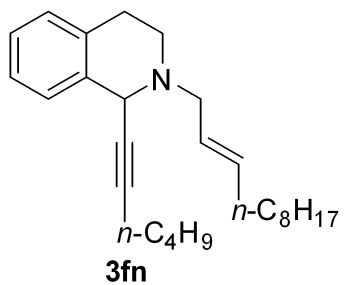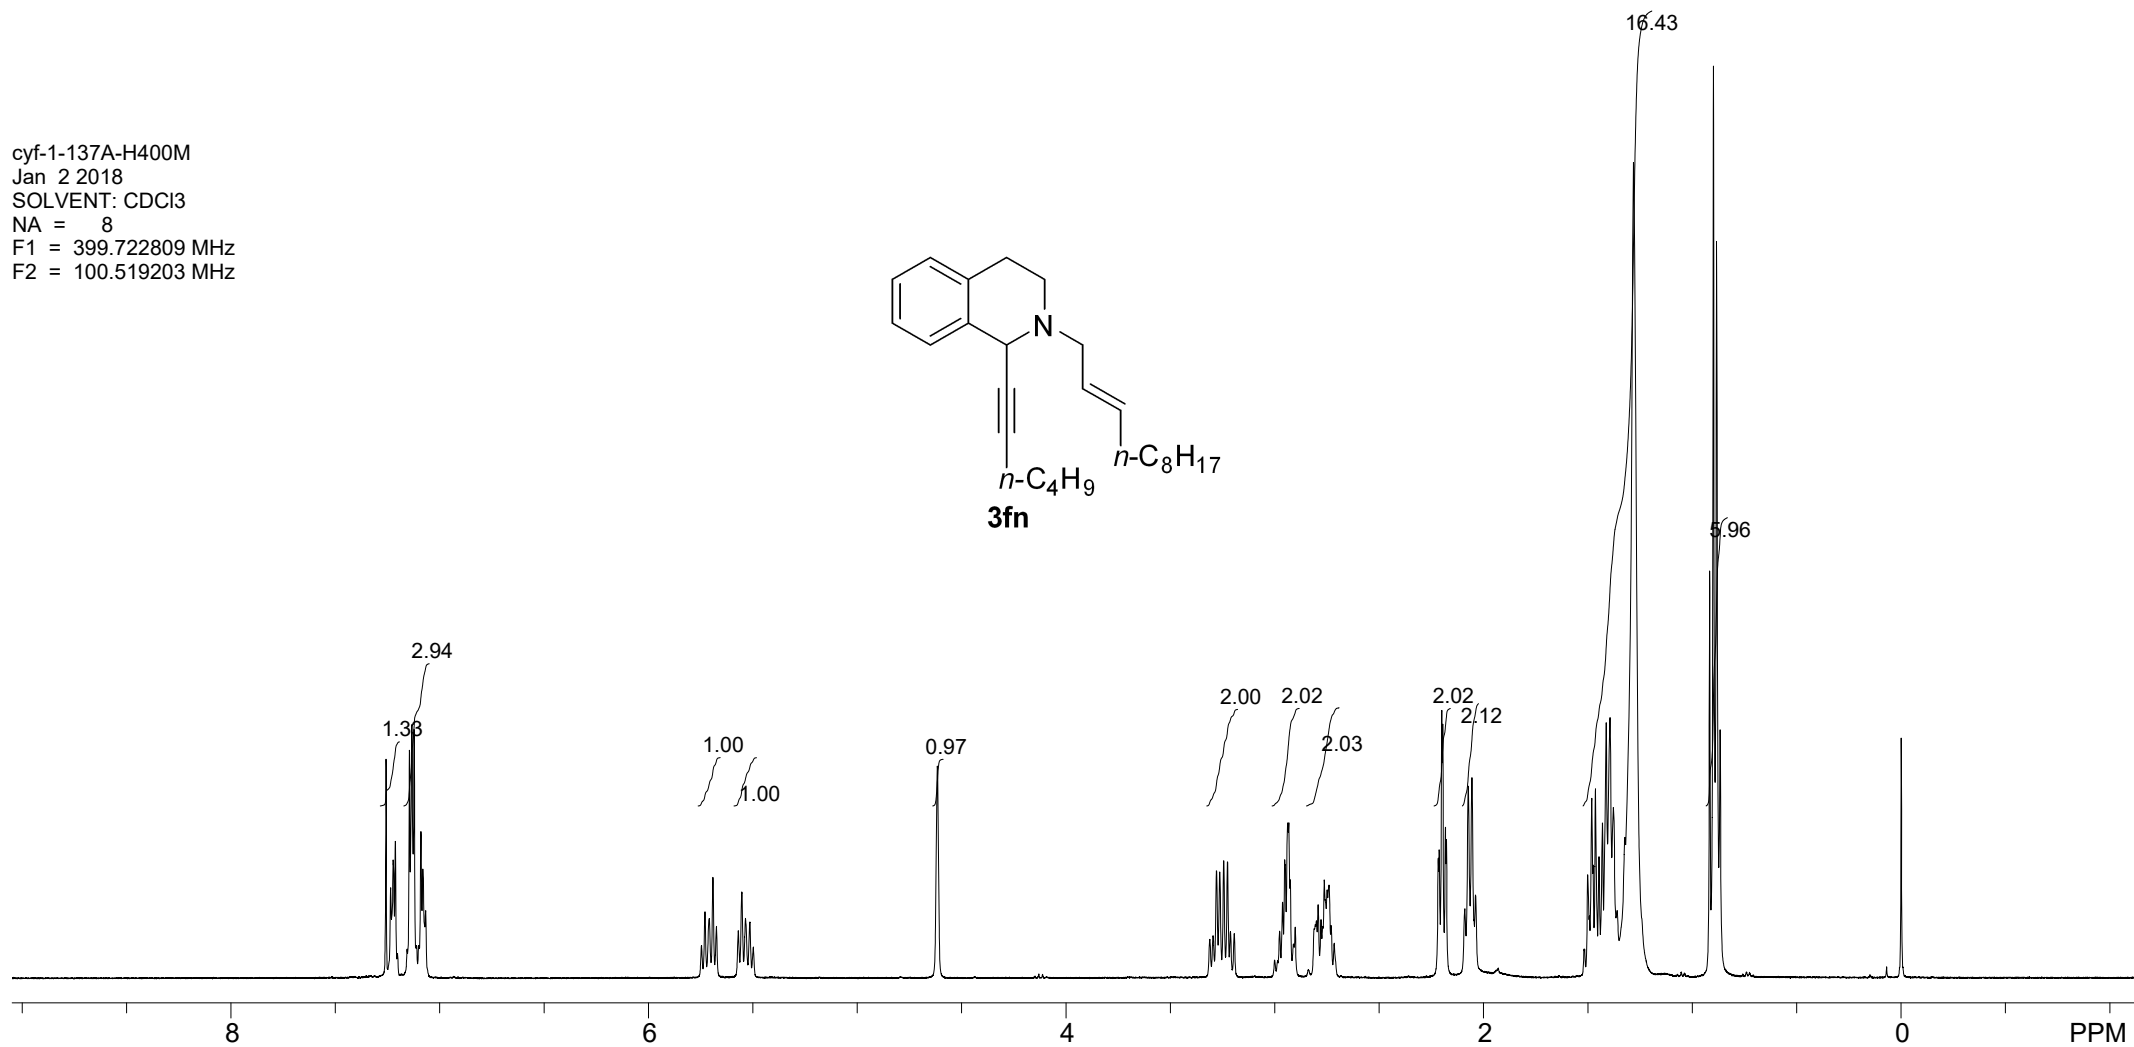

cyf-1-137A-C100M-Agilent  
Jan 2 2018  
SOLVENT: CDCl3  
NA = 240  
F1 = 100.520737 MHz  
F2 = 399.722015 MHz

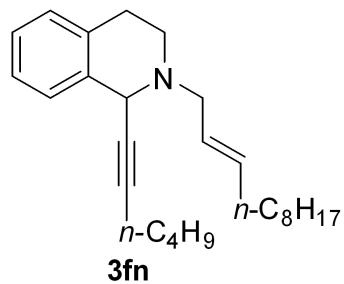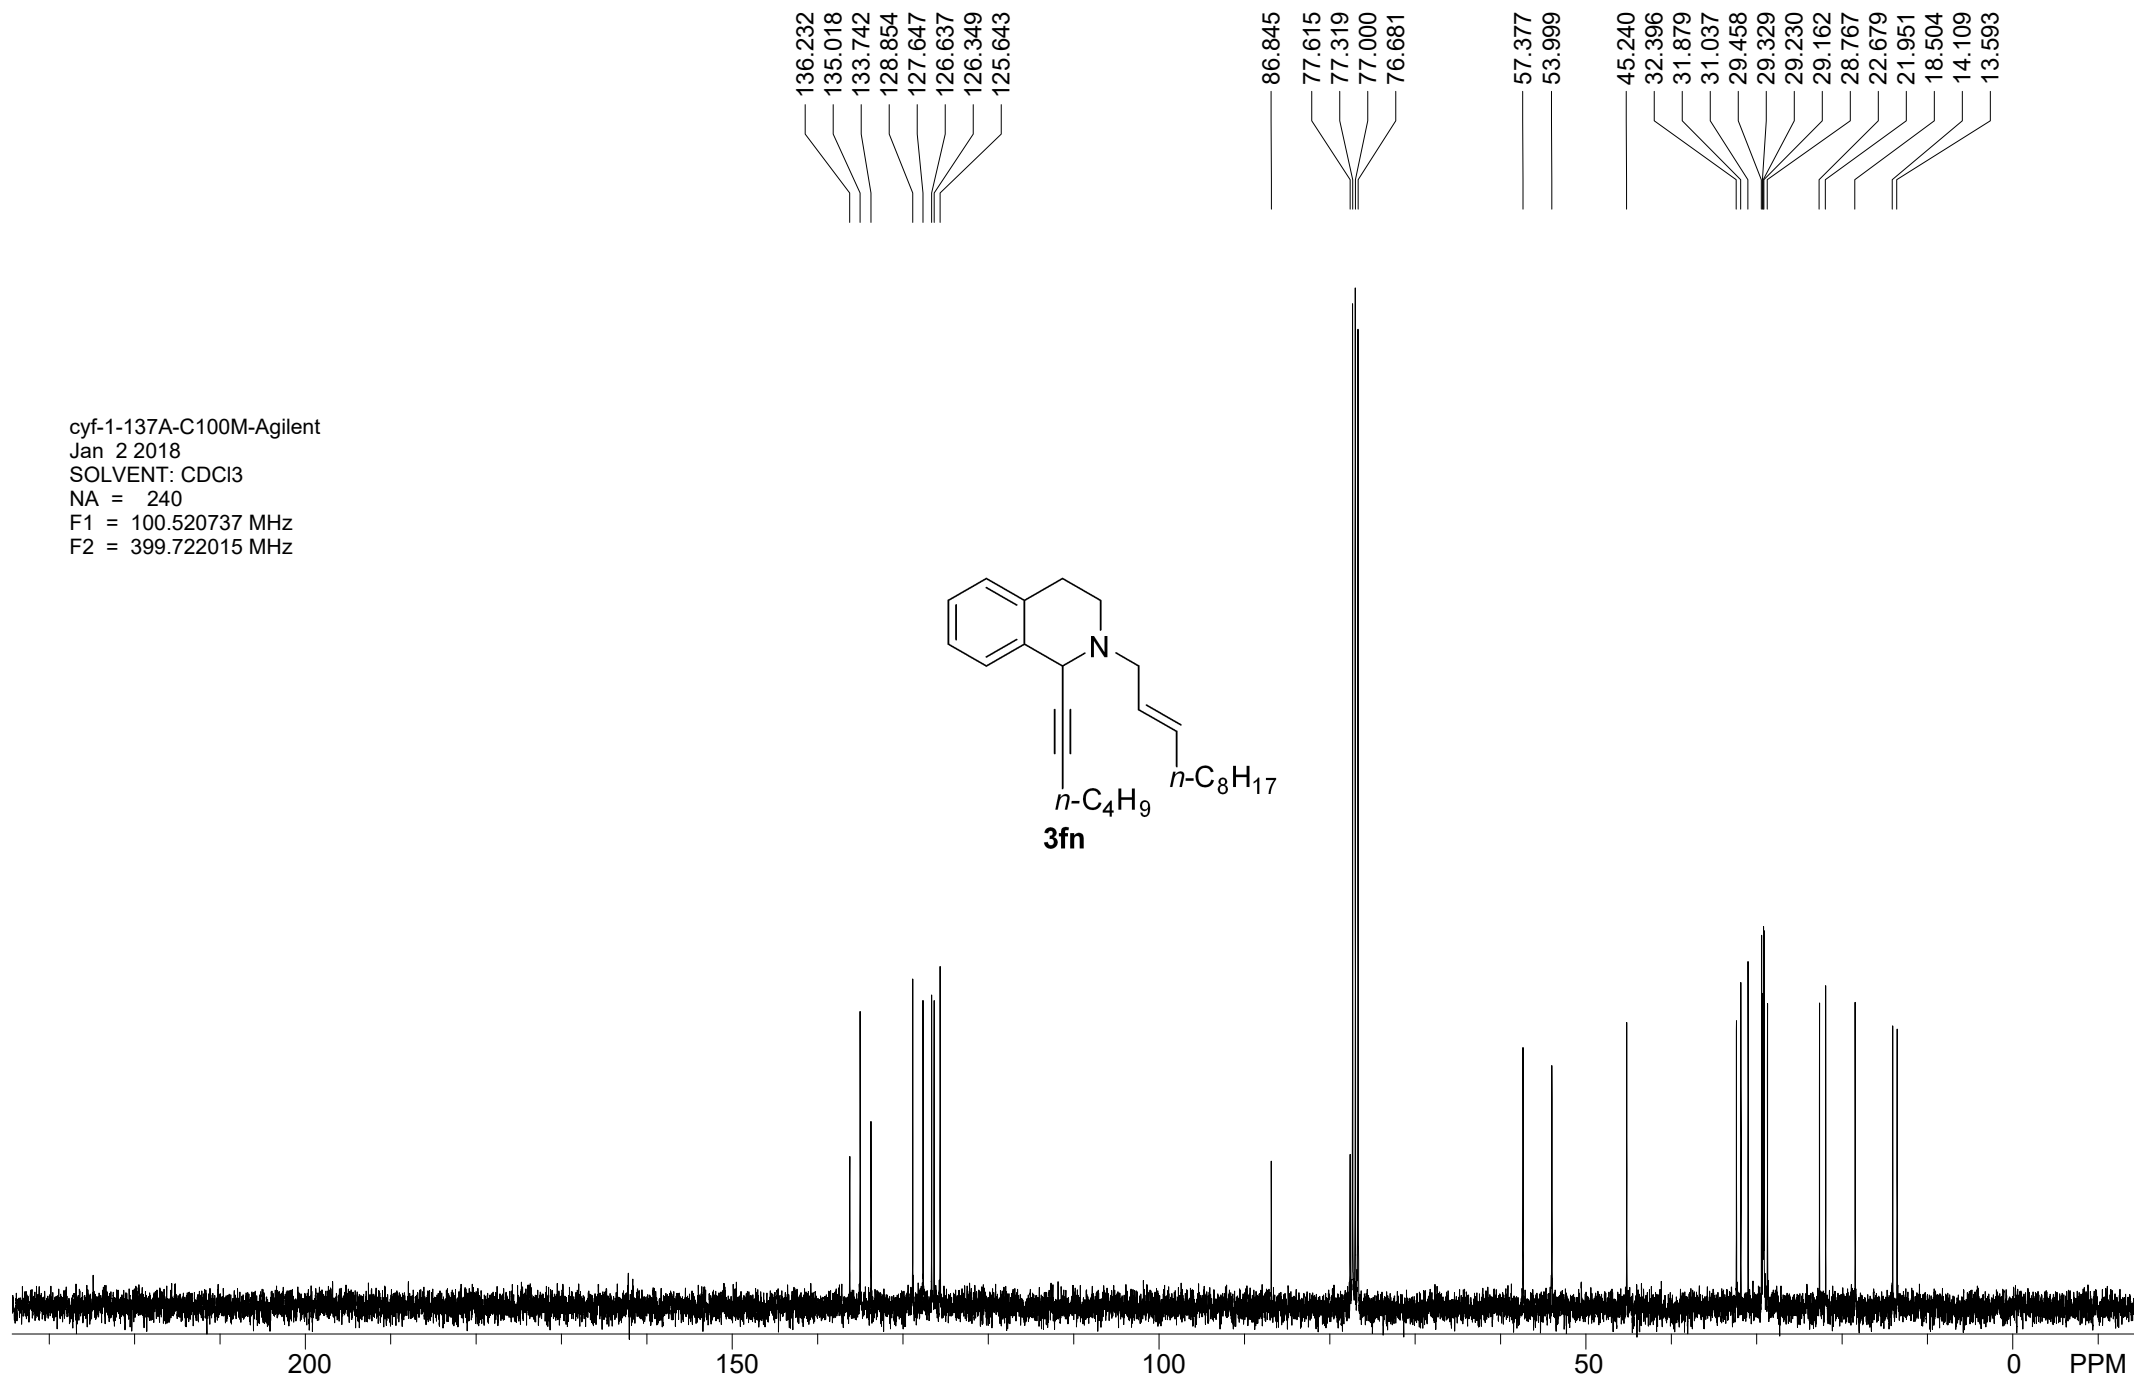

7.459  
7.449  
7.440  
7.435  
7.315  
7.306  
7.294  
7.289  
7.259

5.701  
5.685  
5.664  
5.646  
5.630  
5.528  
5.511  
5.494  
5.473  
5.456  
3.190  
3.175  
3.158  
3.144  
3.101  
3.082  
3.069  
3.050  
2.565  
2.558  
2.536  
2.510  
2.057  
2.041  
2.023  
2.005  
1.877  
1.867  
1.856  
1.849  
1.733  
1.717  
1.706  
1.688  
1.661  
1.634  
1.614  
1.589  
1.559  
1.526  
1.516  
1.386  
1.370  
1.352  
1.292  
1.259  
0.891  
0.875  
0.857  
-0.000

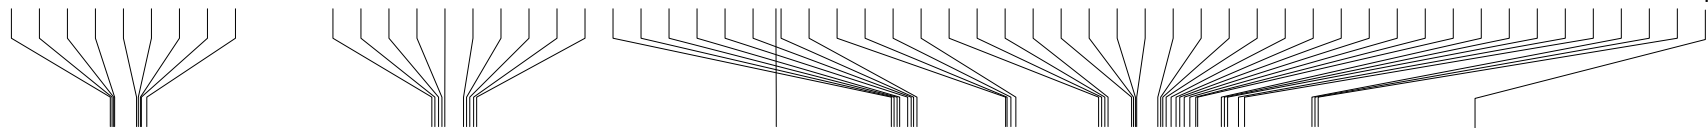

cyf-2-112-h  
Nov 13 2018  
SOLVENT: CDCl3  
NA = 8  
F1 = 399.722626 MHz  
F2 = 100.519203 MHz

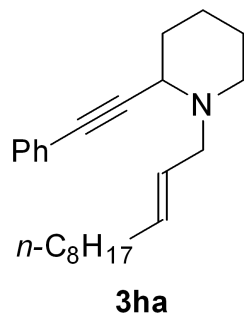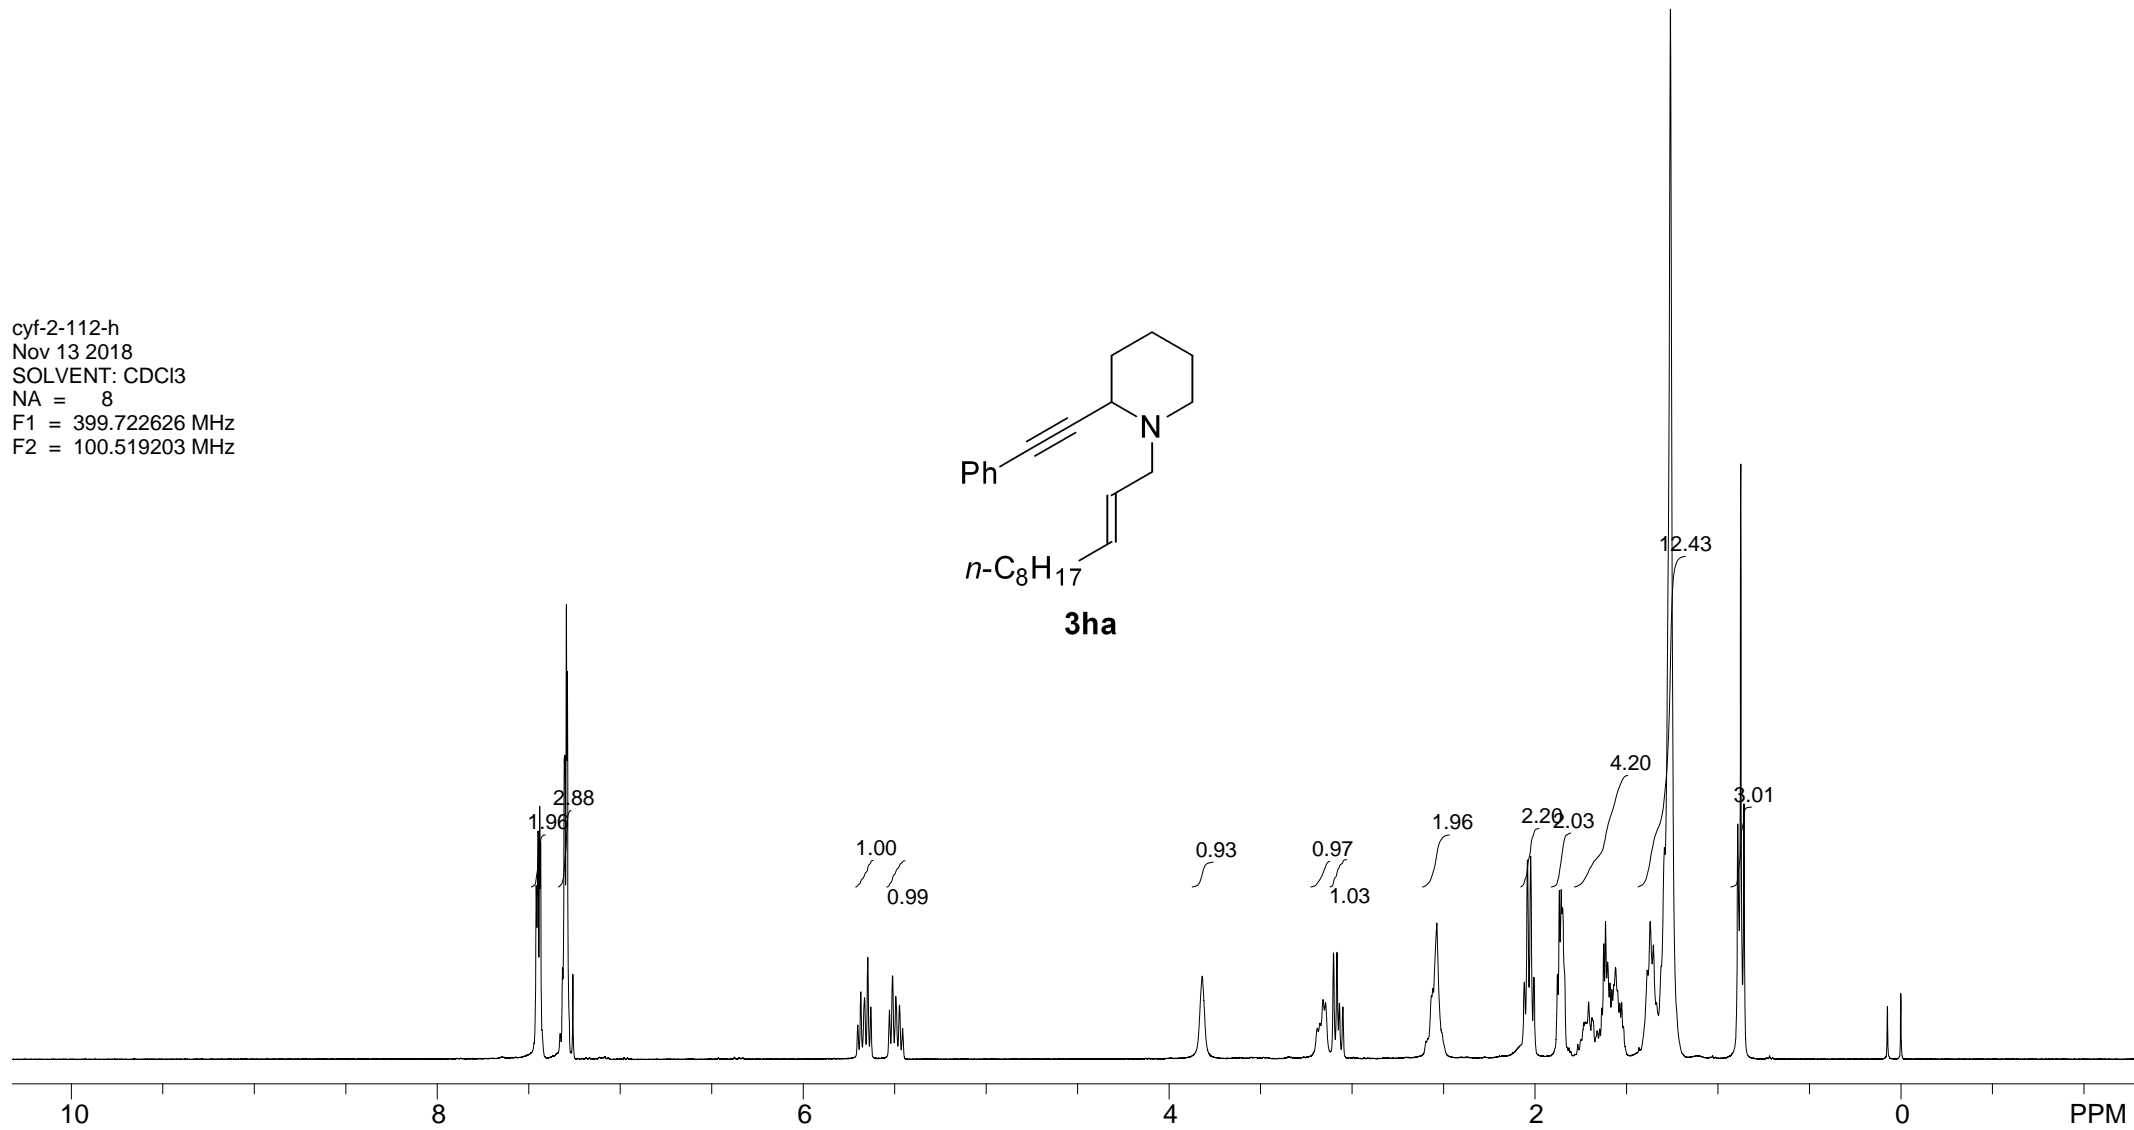

cyf-2-112-c-Bruker  
Nov 12 2018  
NA = 250  
Solvent = CDCl3  
F1 = 100.630371 MHz  
F2 = 1.000000 MHz

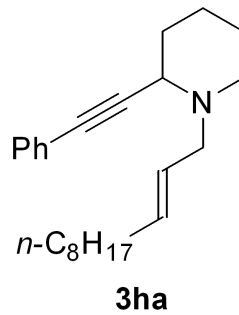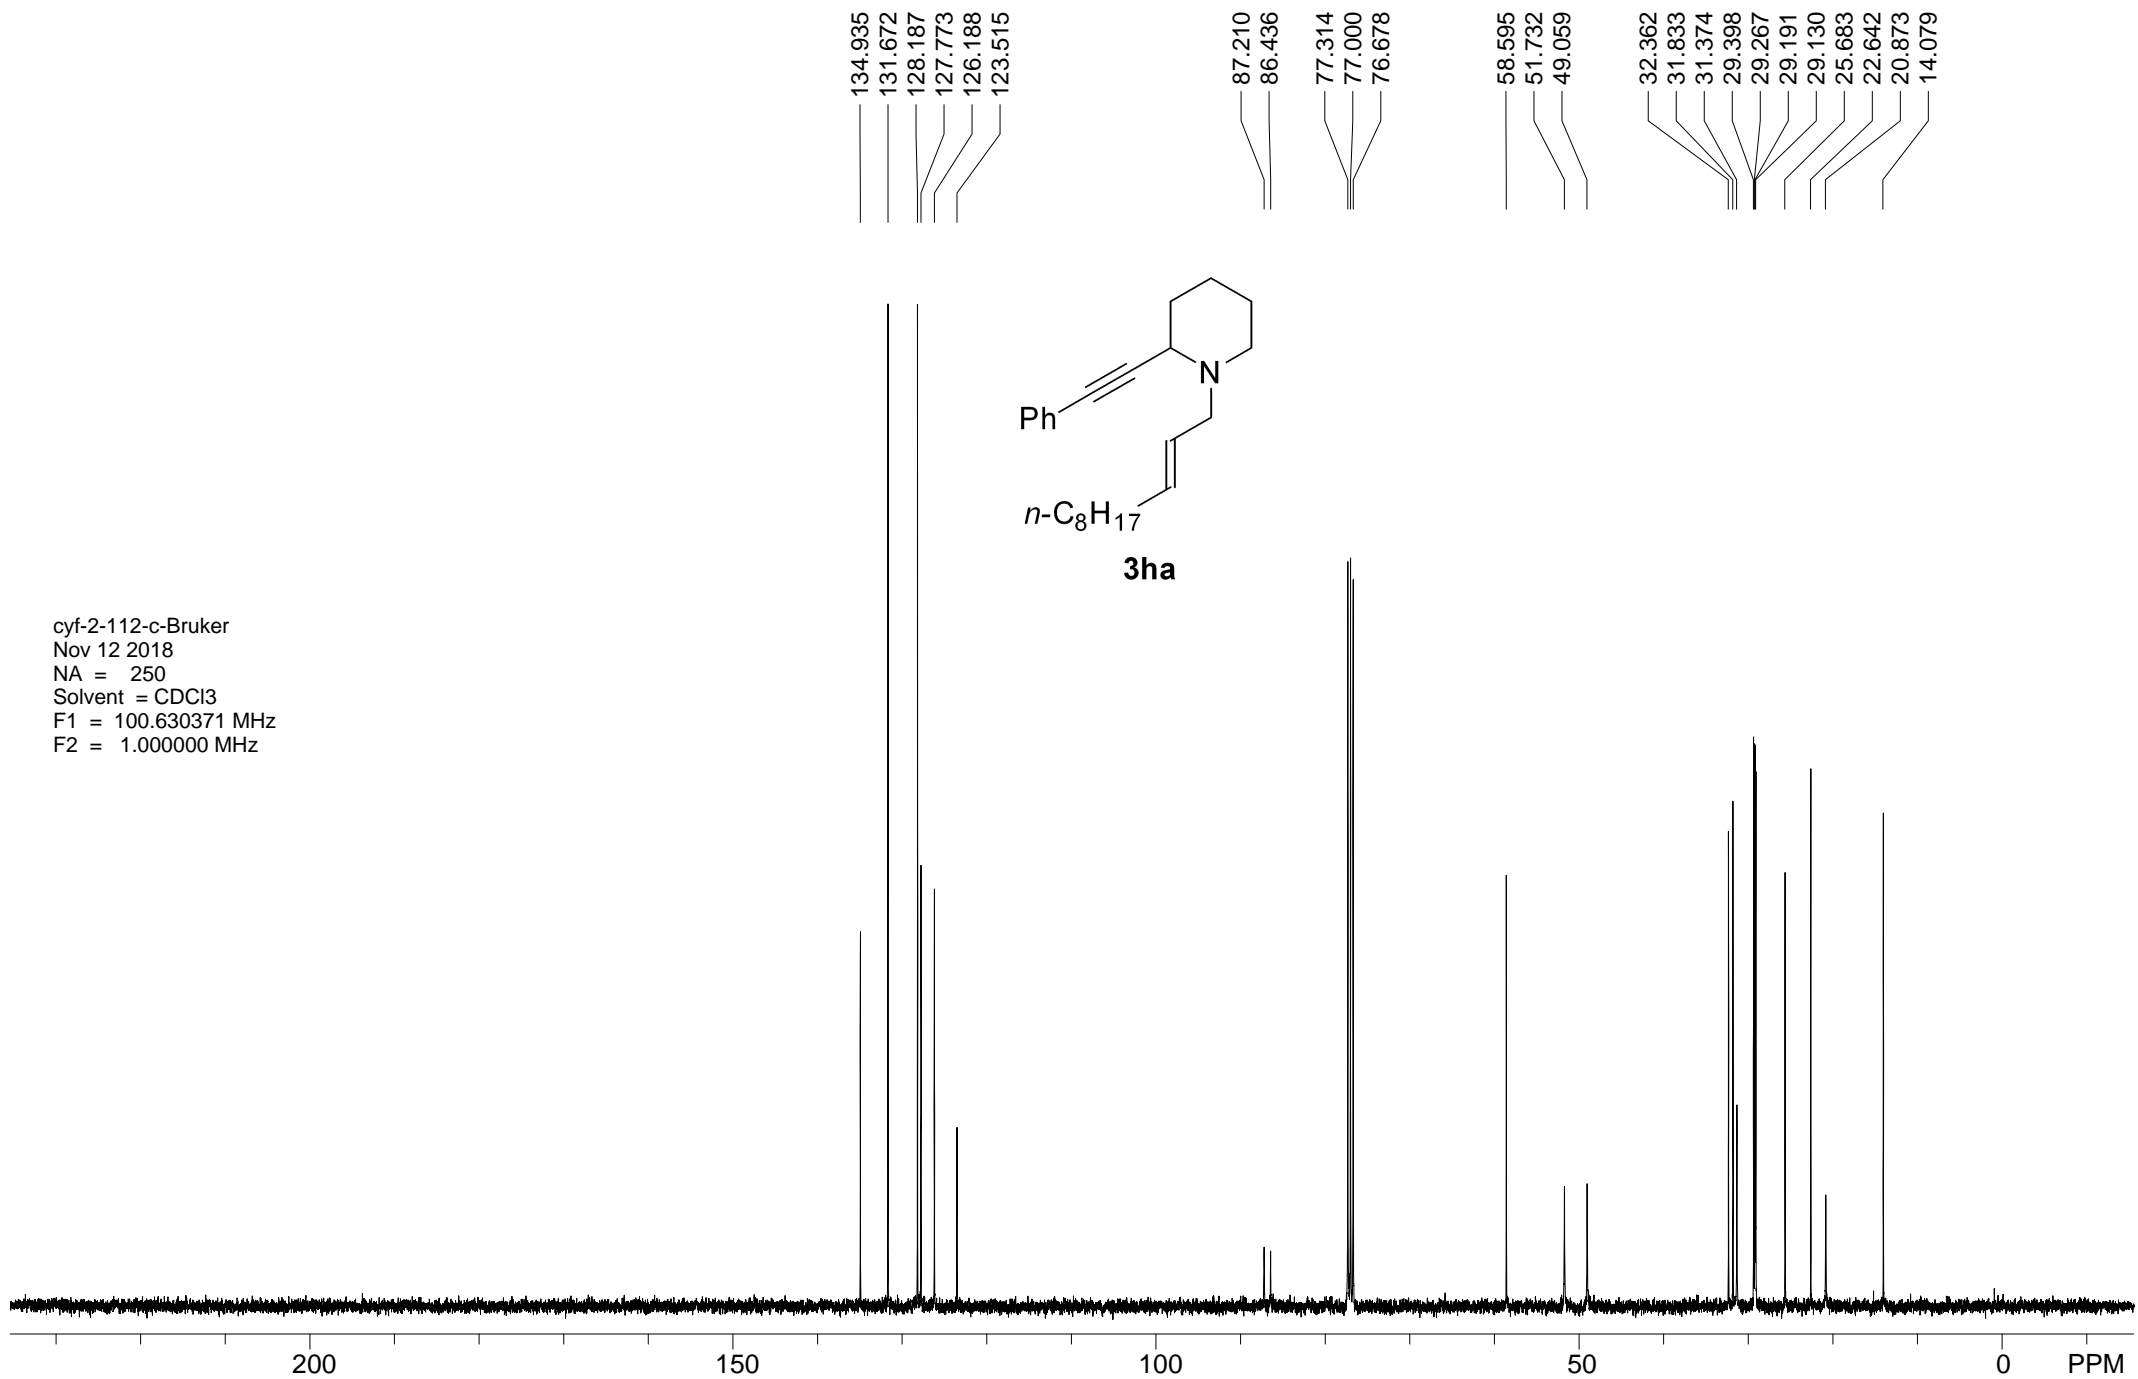

7.258

5.125  
5.108  
5.091  
5.074  
5.057  
4.659  
4.651  
4.643  
4.635  
4.627

2.018  
2.010  
2.001  
1.992  
1.983  
1.974  
1.965  
1.957  
1.424  
1.406  
1.387  
1.370  
1.330  
1.320  
1.303  
1.272  
0.898  
0.881  
0.864  
-0.000

cyf-2-92-h  
Oct 23 2018  
SOLVENT: CDCl3  
NA = 8  
F1 = 399.722809 MHz  
F2 = 100.519203 MHz

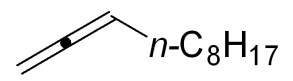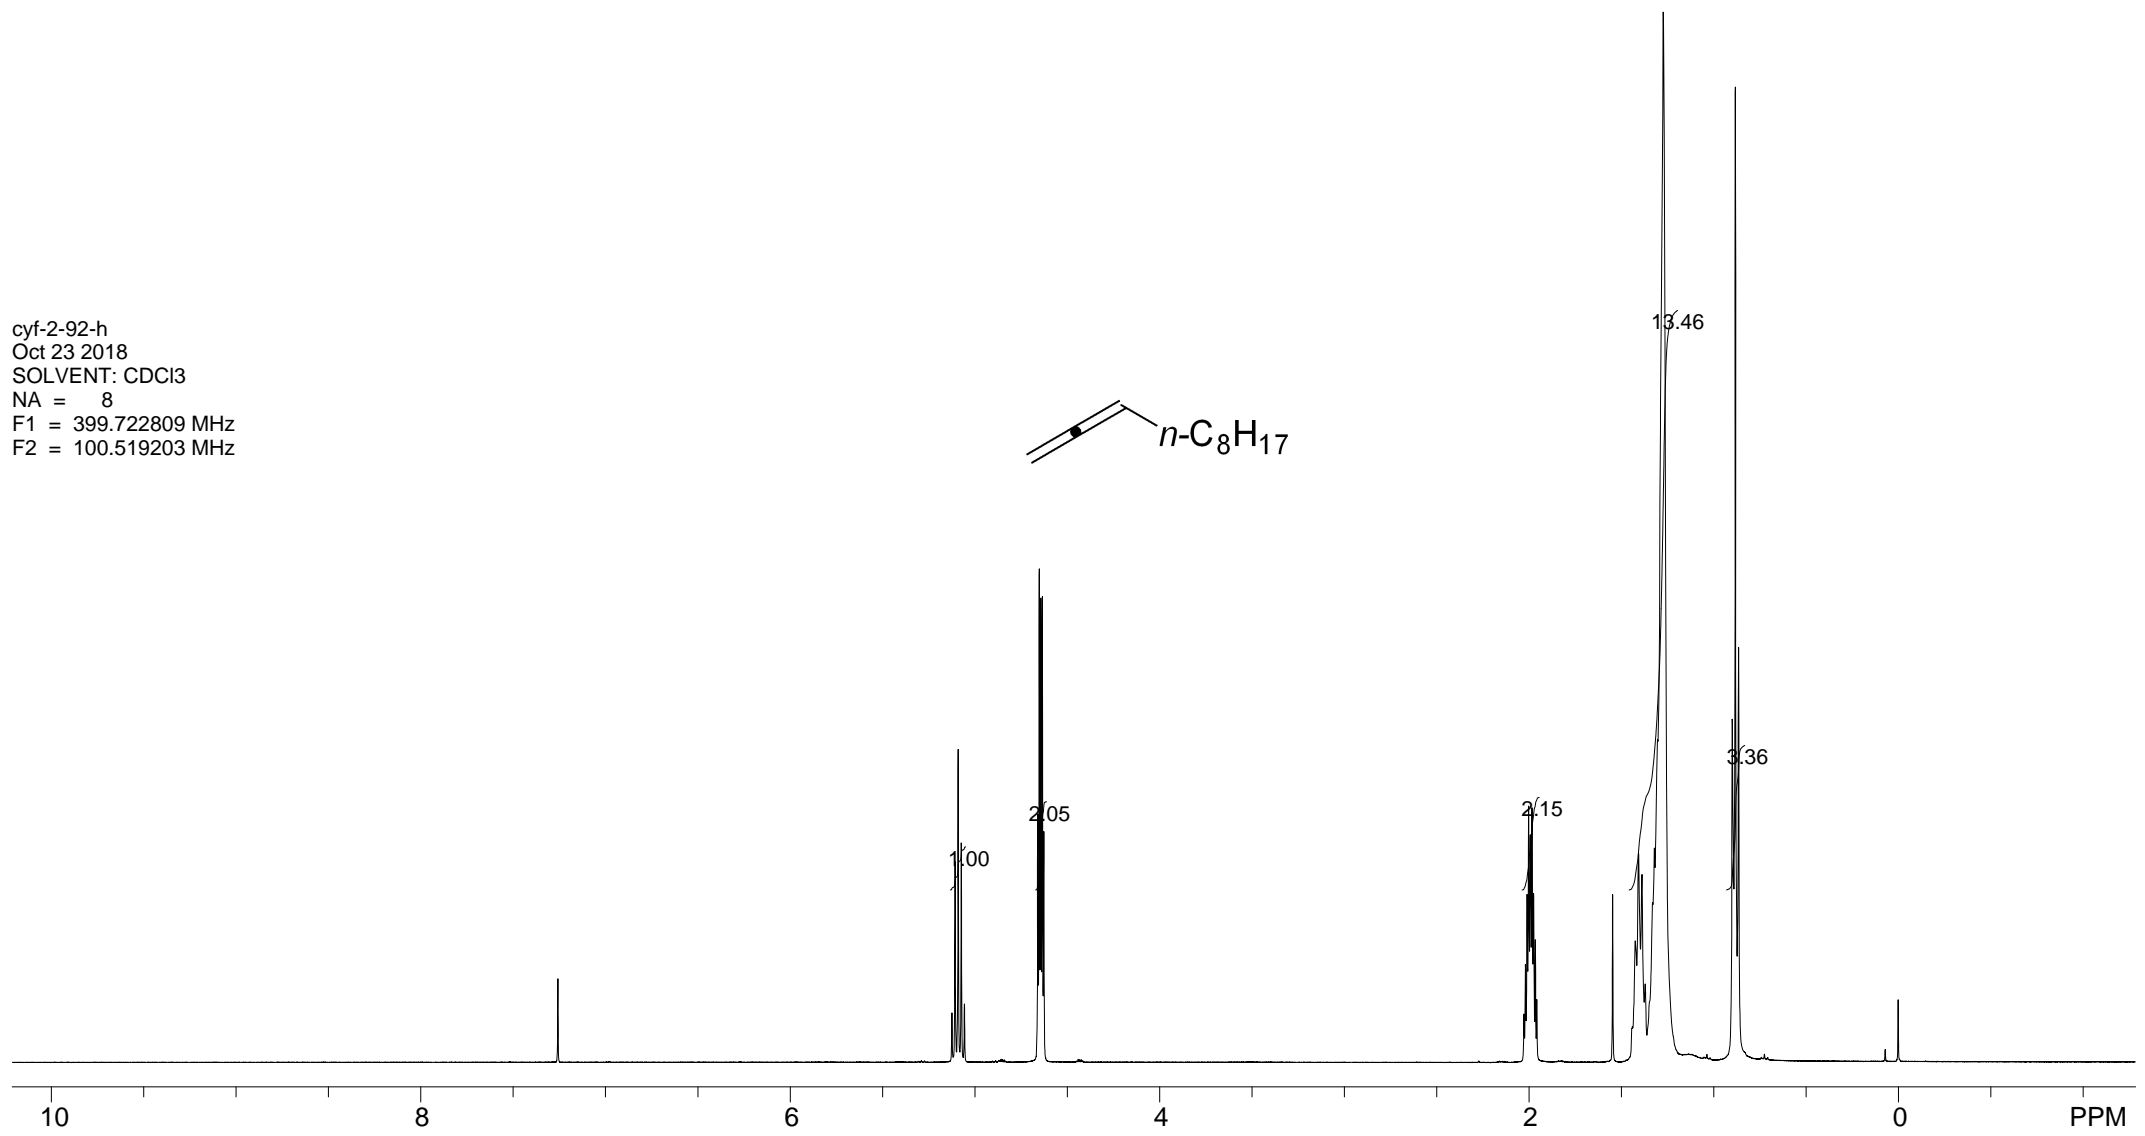

cyf-2-92-c-bruker  
OCT 24 2018  
SOLVENT: CDCl3  
NA = 123  
F1 = 100.630371 MHz  
F2 = 1.000000 MHz

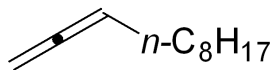

208.487

90.105

77.322

77.000

76.686

74.480

31.872

29.405

29.290

29.137

29.099

28.272

22.665

14.094

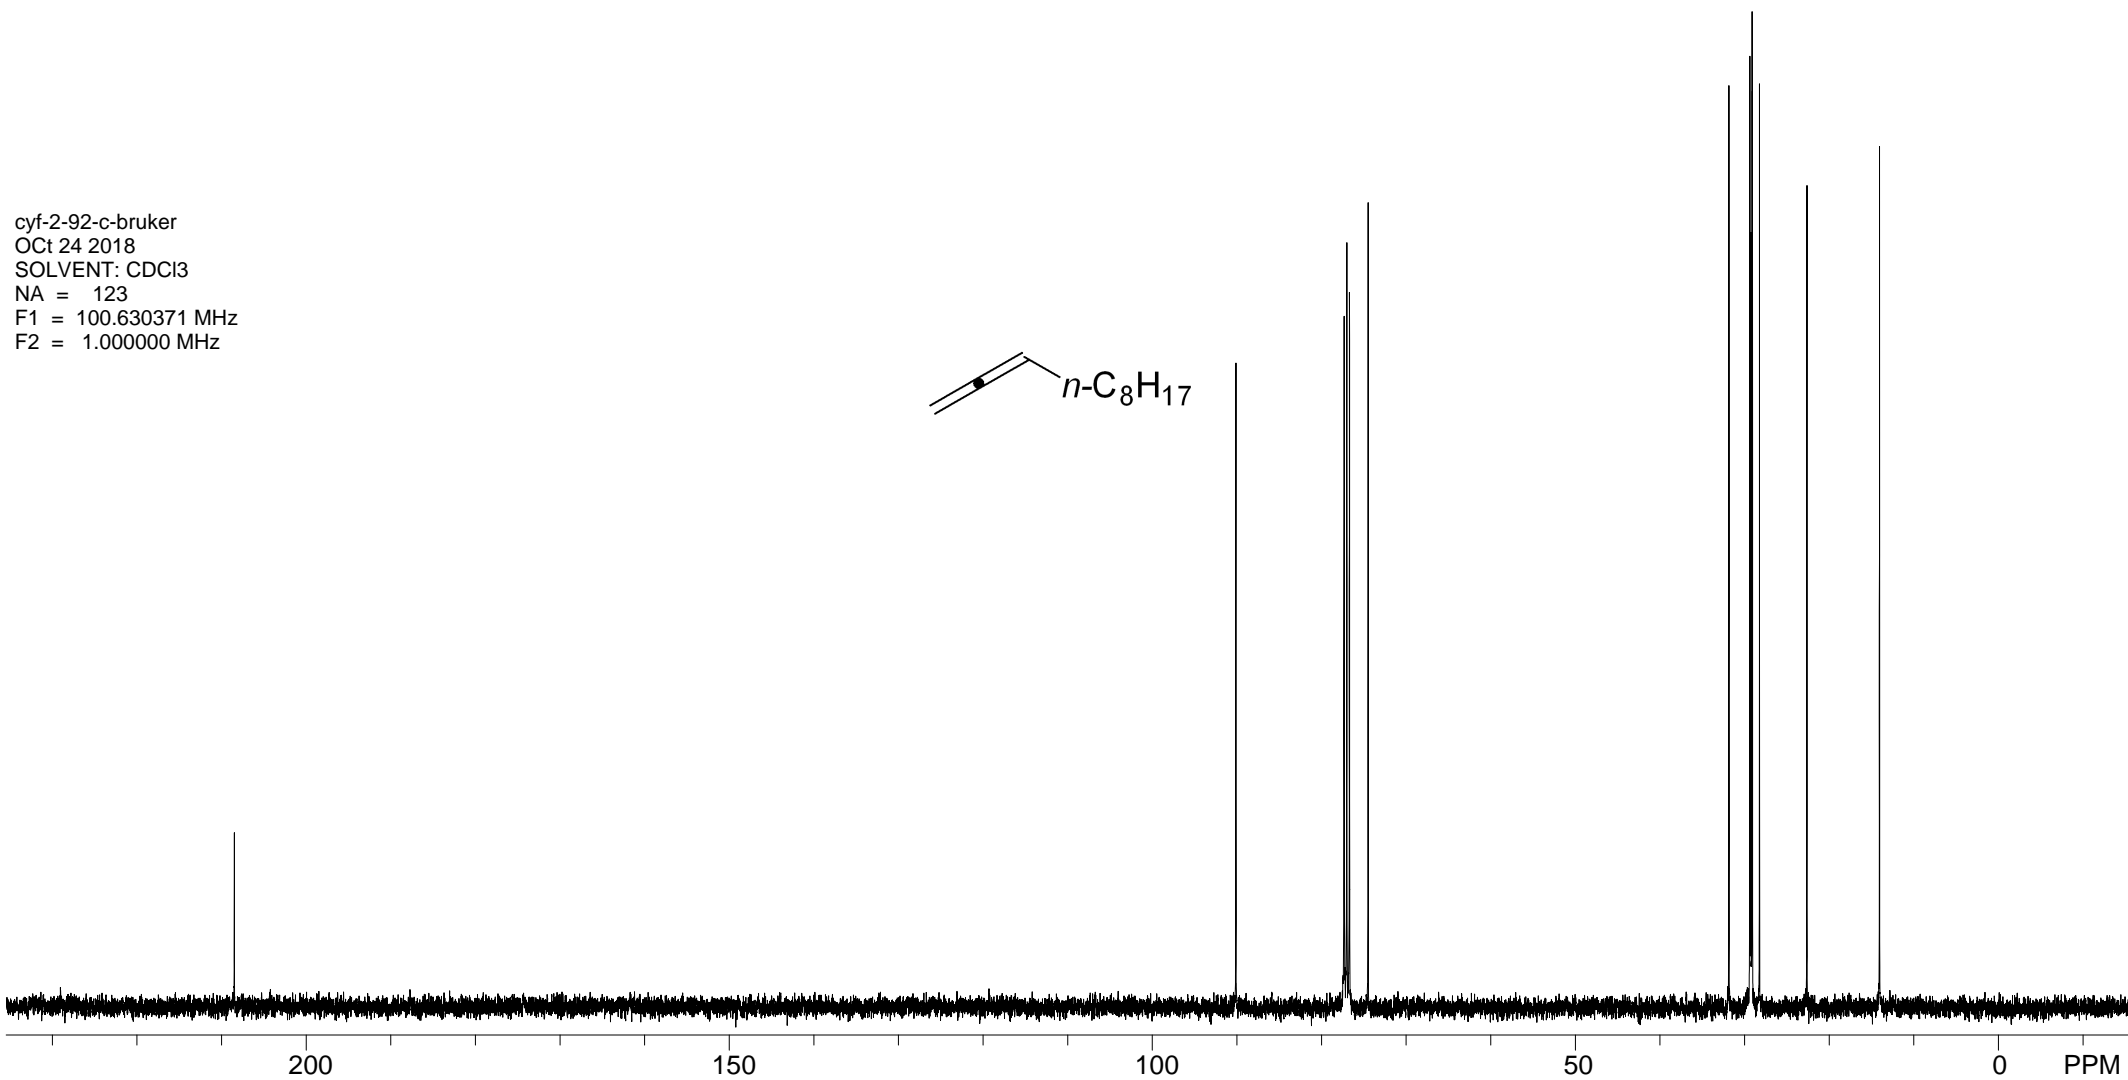



cyf-1-060-H400M  
Sep 22 2017  
SOLVENT: CDCl3  
NA = 8  
F1 = 400.031616 MHz  
F2 = 100.596855 MHz

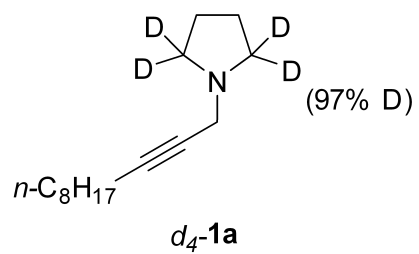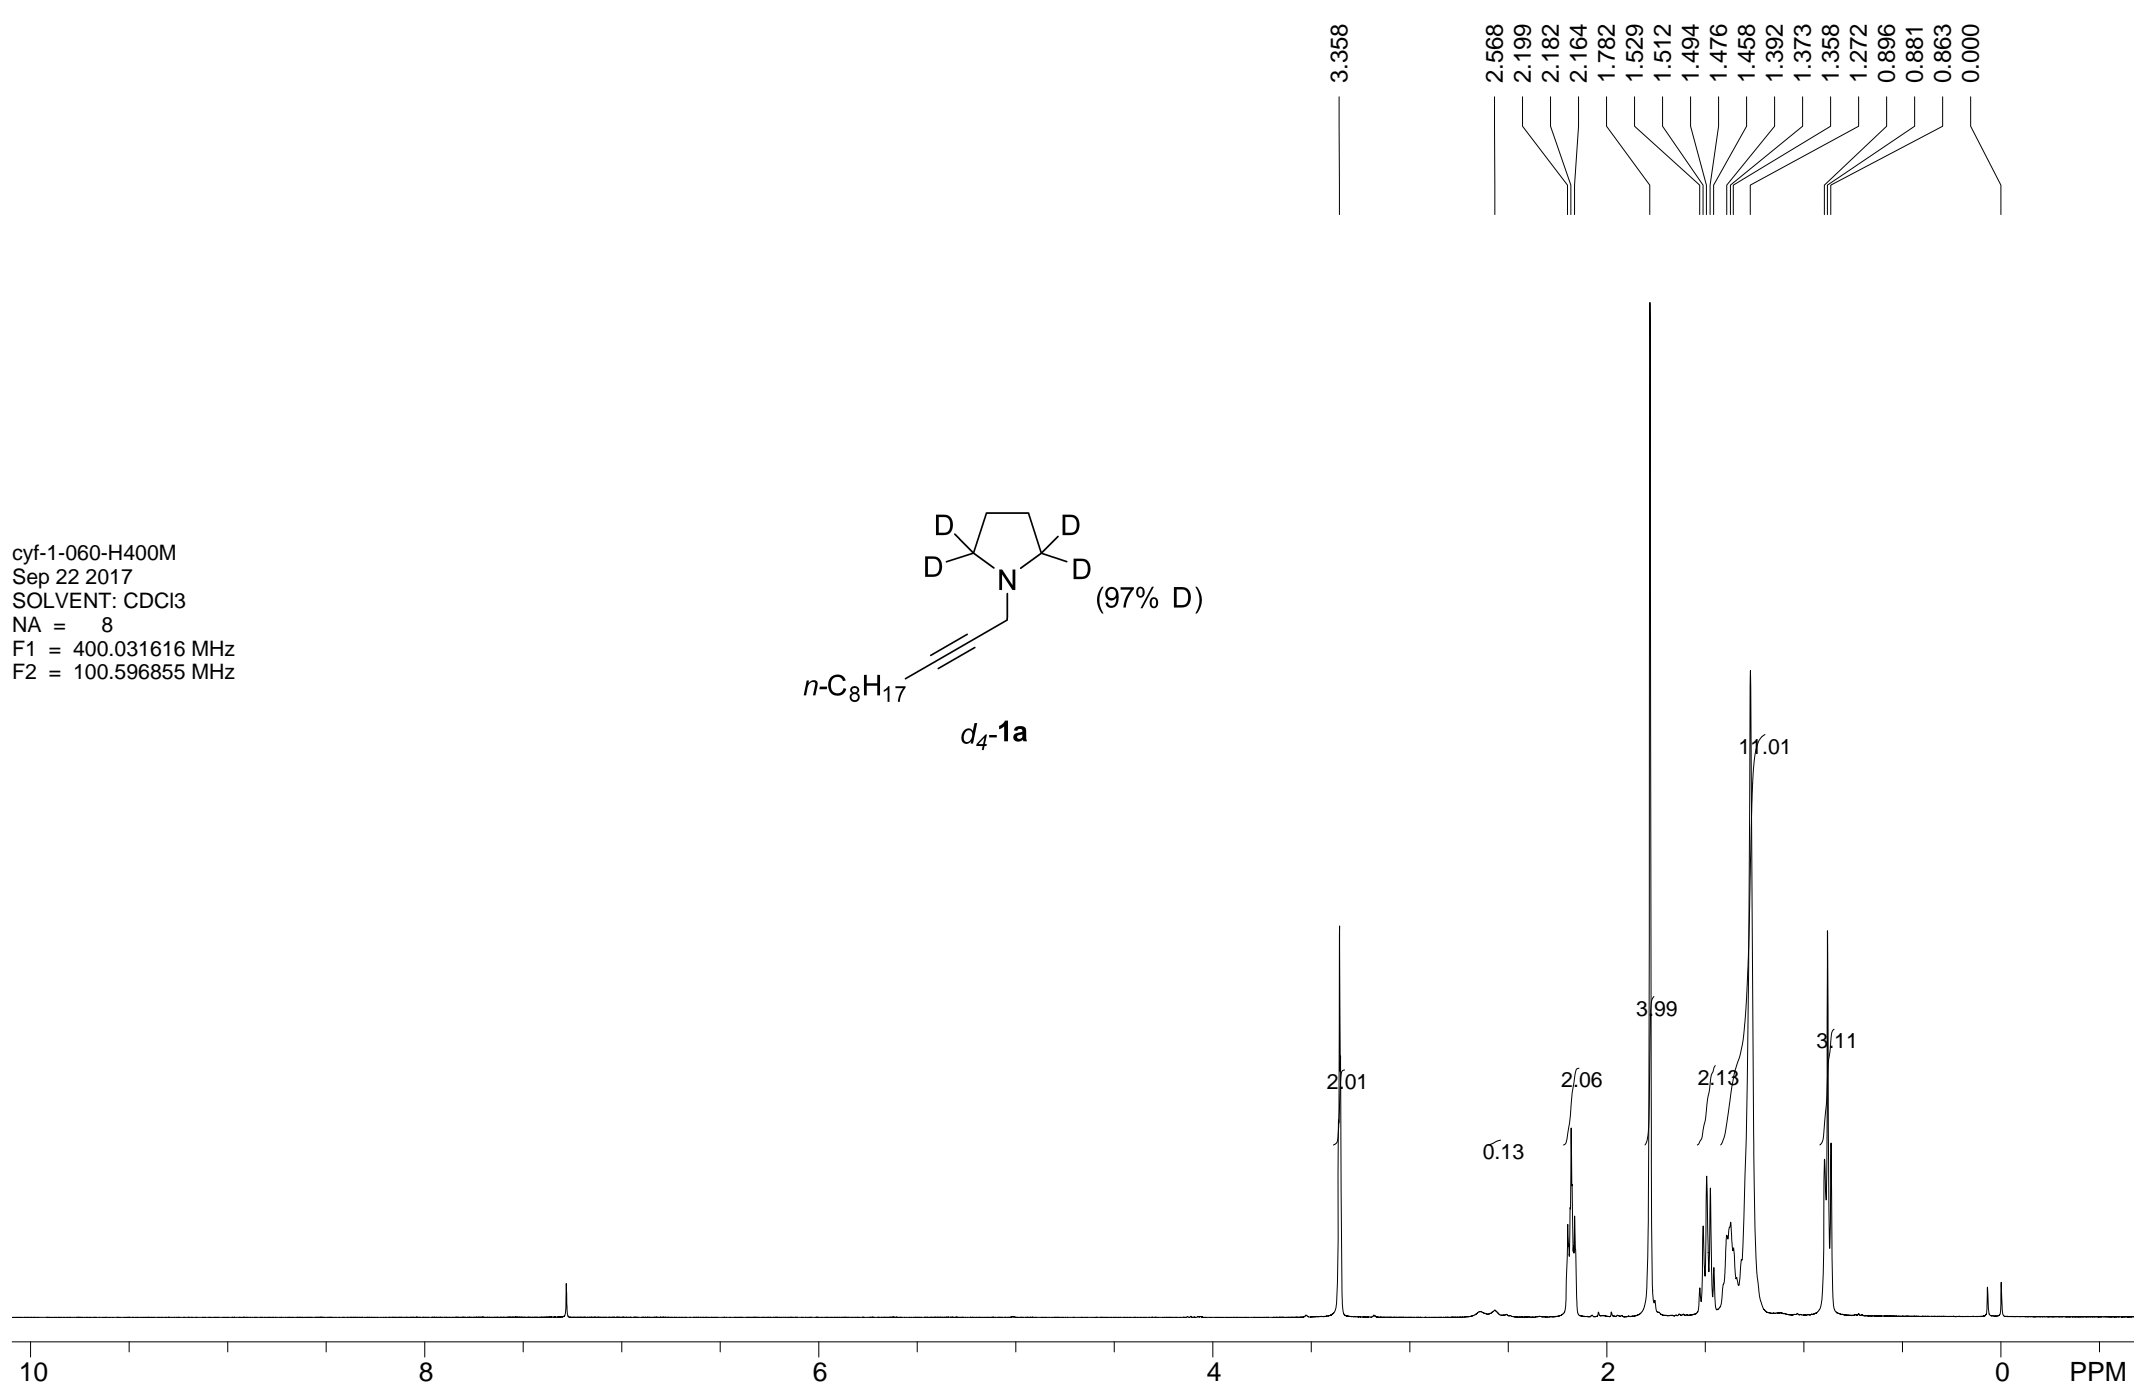

cyf-1-060-C100M-agilent2  
Sep 26 2017  
SOLVENT: CDCl3  
NA = 652  
F1 = 100.520737 MHz  
F2 = 399.722015 MHz

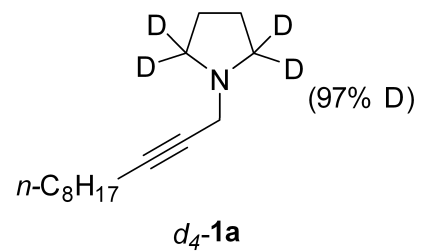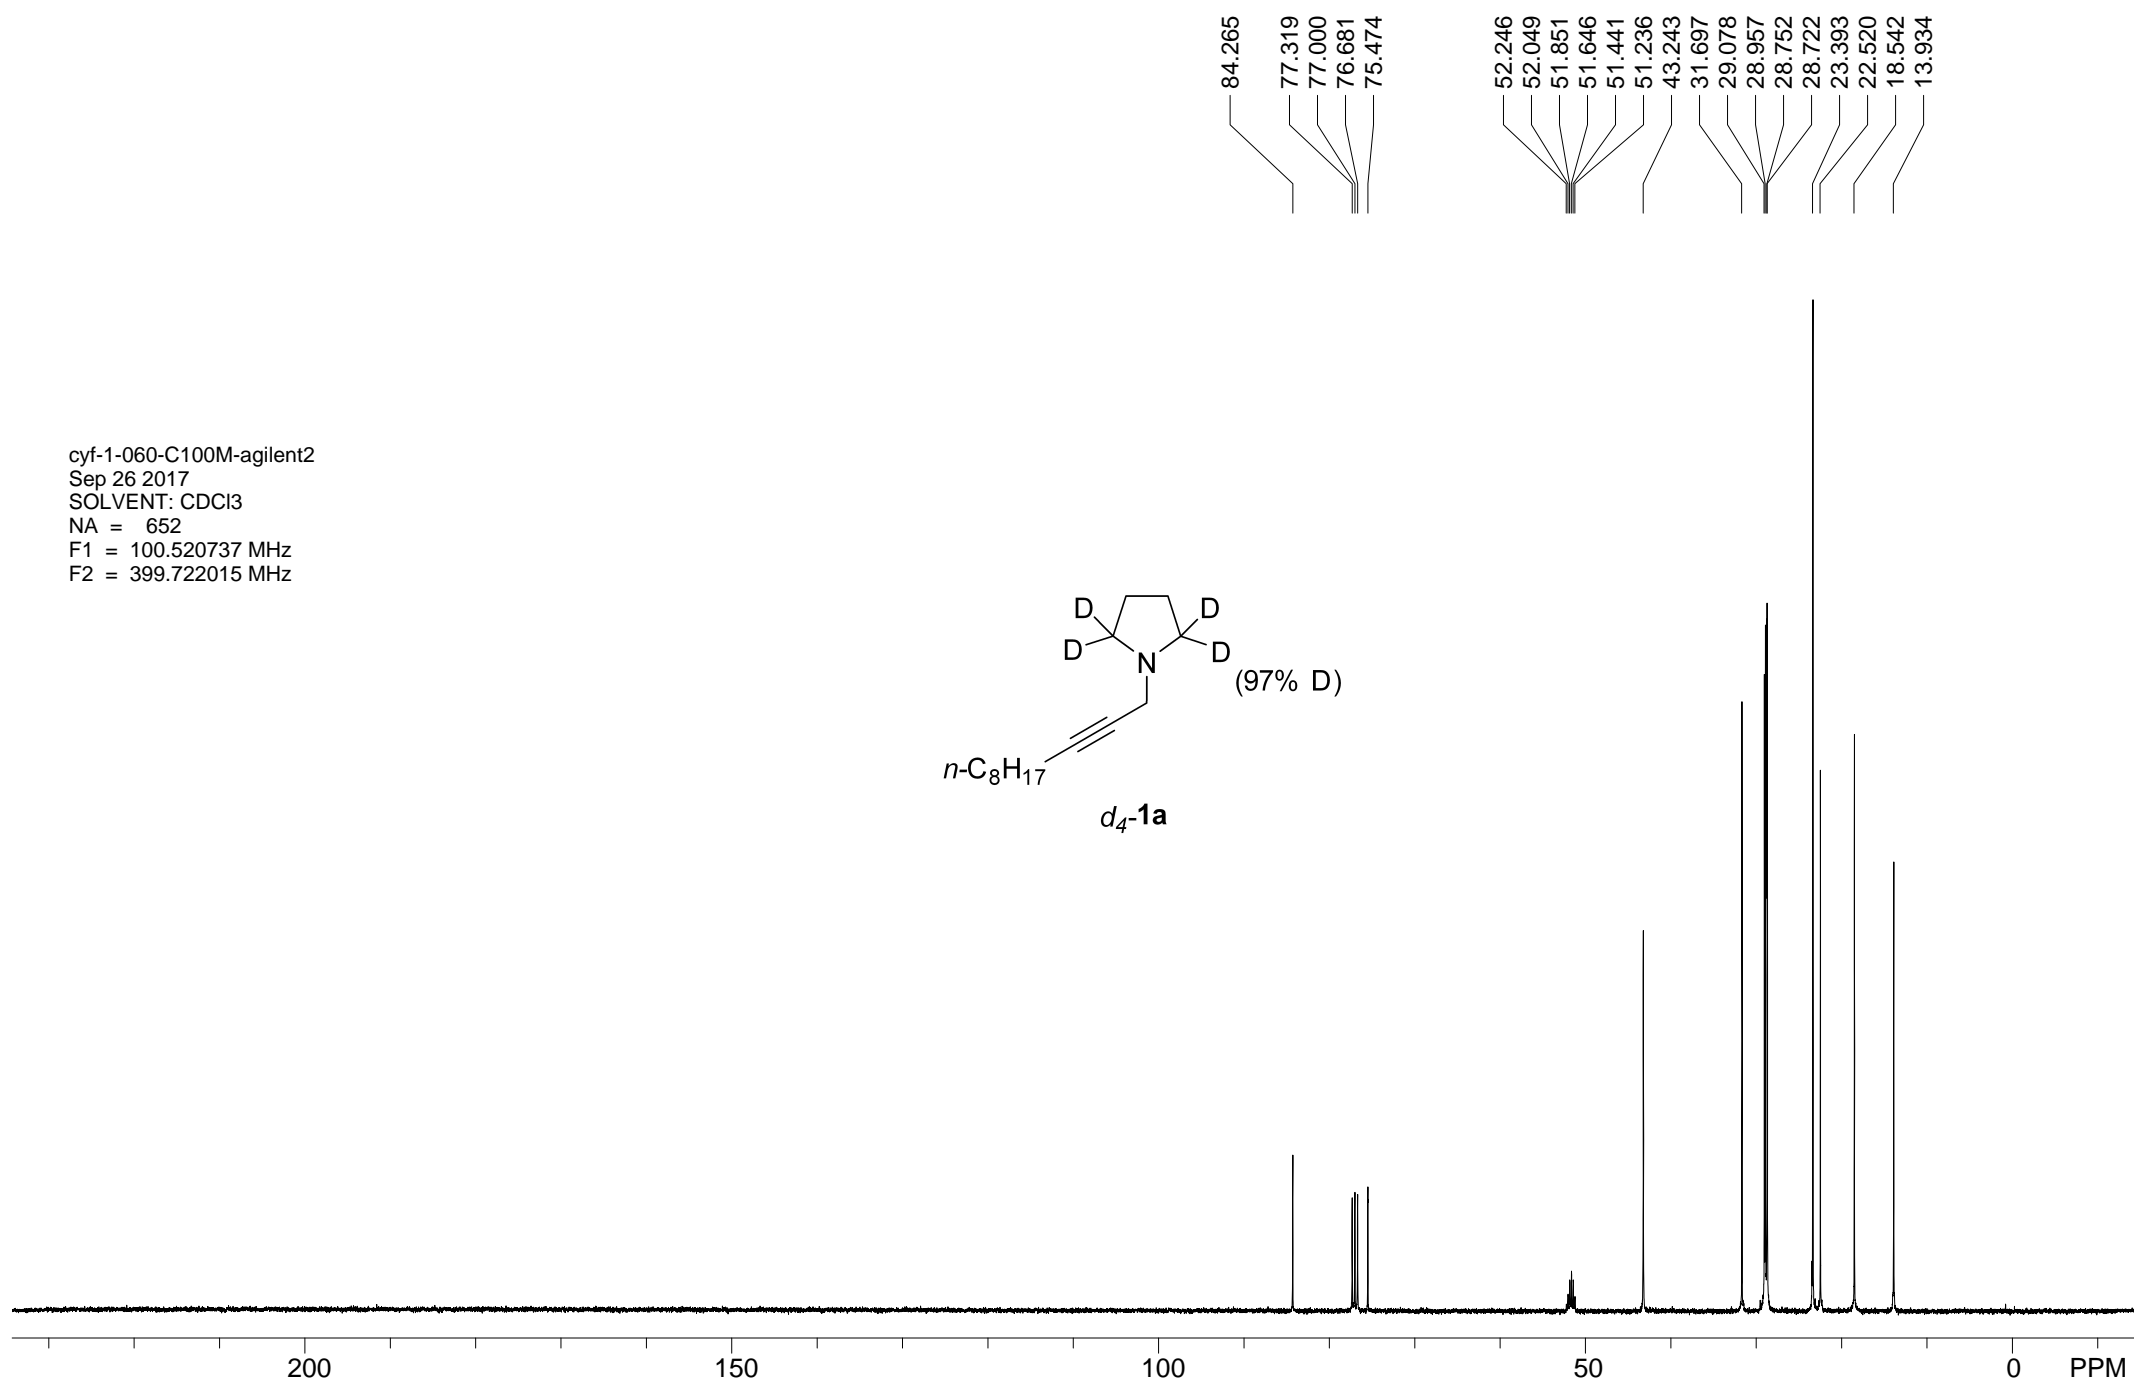

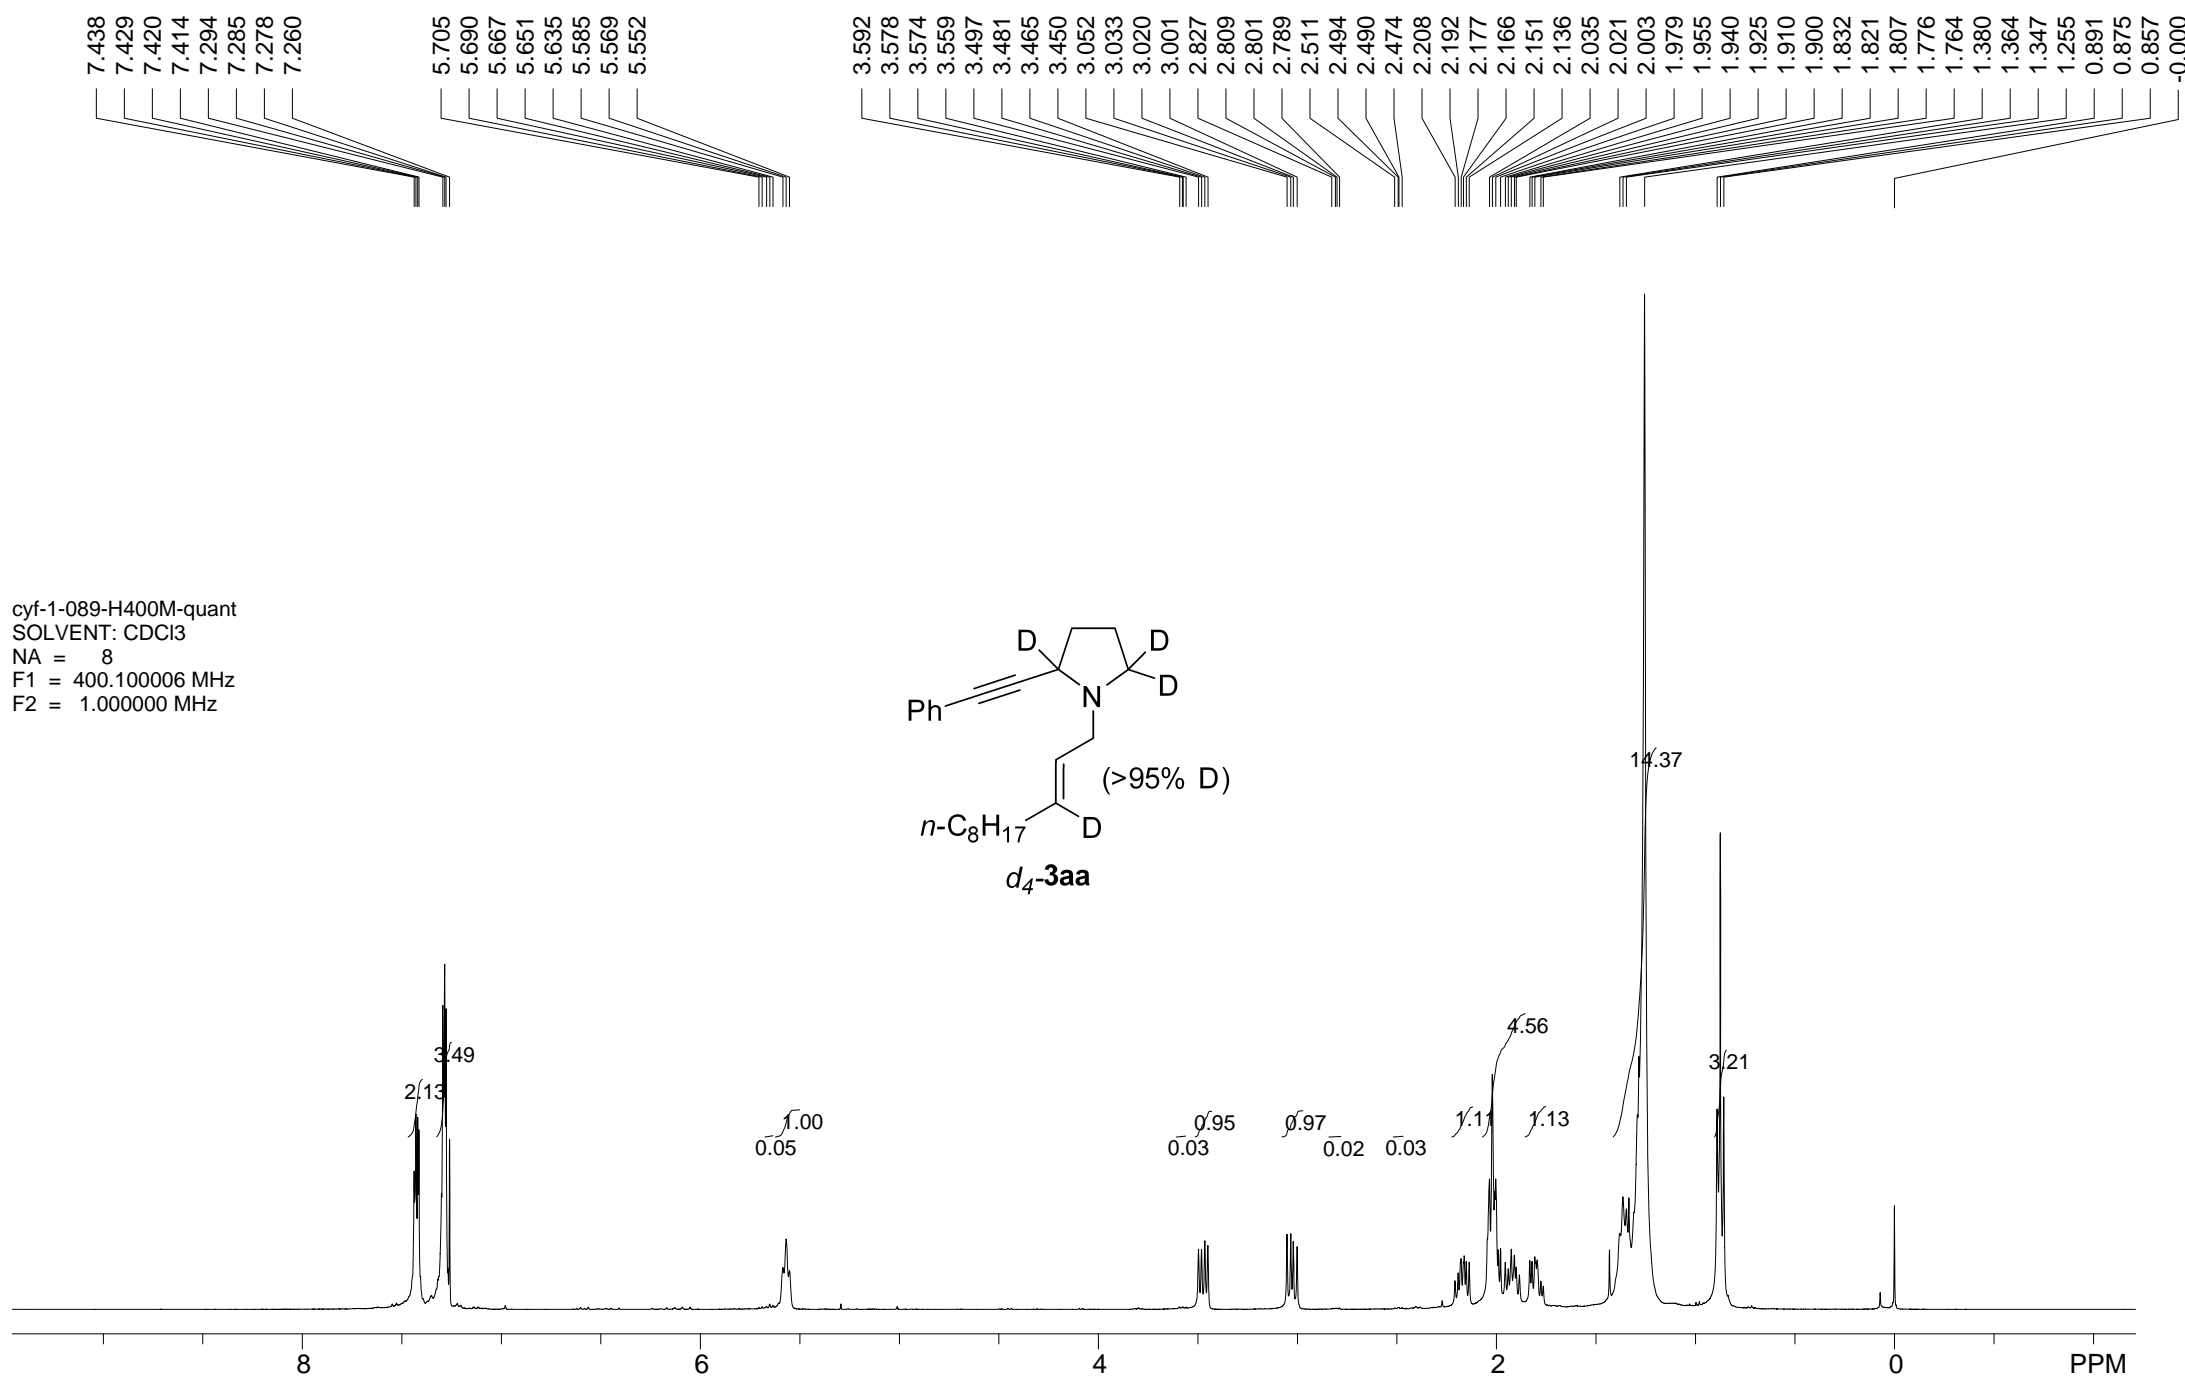

cyf-1-089-C100M-2  
SOLVENT: CDCl<sub>3</sub>  
NA = 12000  
F1 = 100.605225 MHz  
F2 = 1.000000 MHz

134.022  
133.800  
133.570  
131.670  
128.161  
127.847  
126.644  
123.388

88.683  
84.585

55.173  
54.361  
54.139  
53.925  
51.235  
51.021  
50.806  
50.623  
50.400  
32.220  
31.860  
31.600  
29.669  
29.416  
29.263  
29.179  
29.141  
22.652  
21.778  
14.086

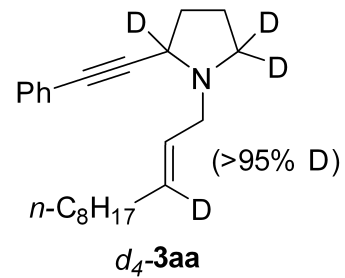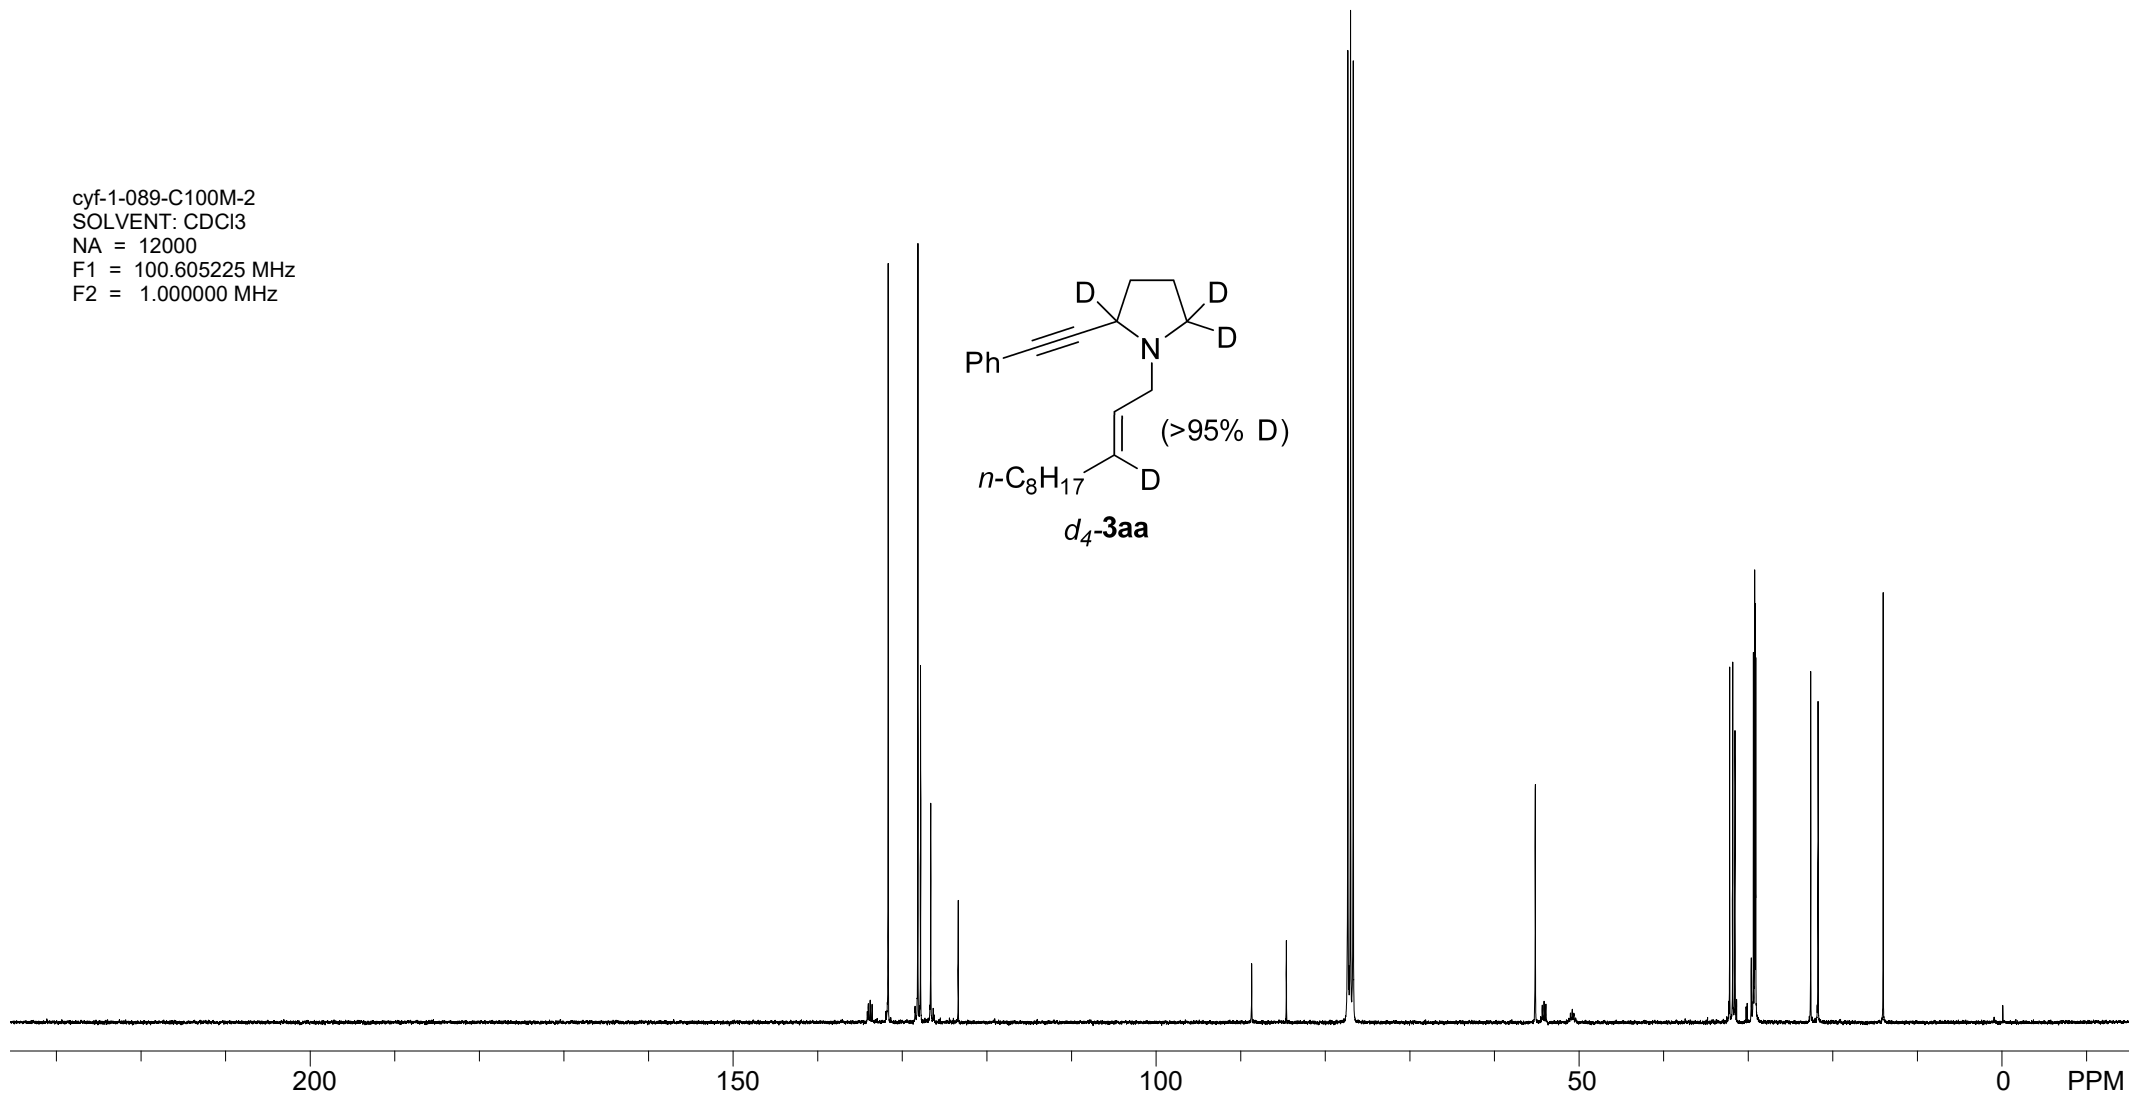

7.435  
7.426  
7.418  
7.413  
7.286  
7.277  
7.271

5.705  
5.690  
5.667  
5.652  
5.636  
5.610  
5.594  
5.577  
5.556  
5.539

3.585  
3.566  
3.566  
3.508  
3.496  
3.478  
3.463  
3.046  
3.028  
3.014  
2.997  
2.867  
2.854  
2.832  
2.811  
2.541  
2.520  
2.503  
2.481  
2.205  
2.189  
2.174  
2.149  
2.133  
2.050  
2.034  
2.016  
1.954  
1.936  
1.921  
1.902  
1.826  
1.813  
1.801  
1.364  
1.347  
1.255  
1.206  
0.891  
0.875  
0.858  
-0.000

cyf-1-075-H400M  
Oct 14 2017  
SOLVENT: CDCl3  
NA = 4  
F1 = 400.032593 MHz  
F2 = 100.597252 MHz

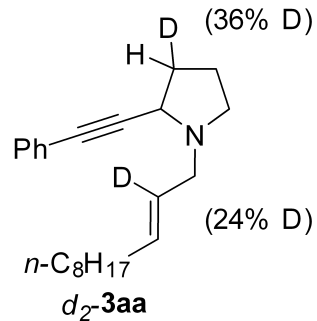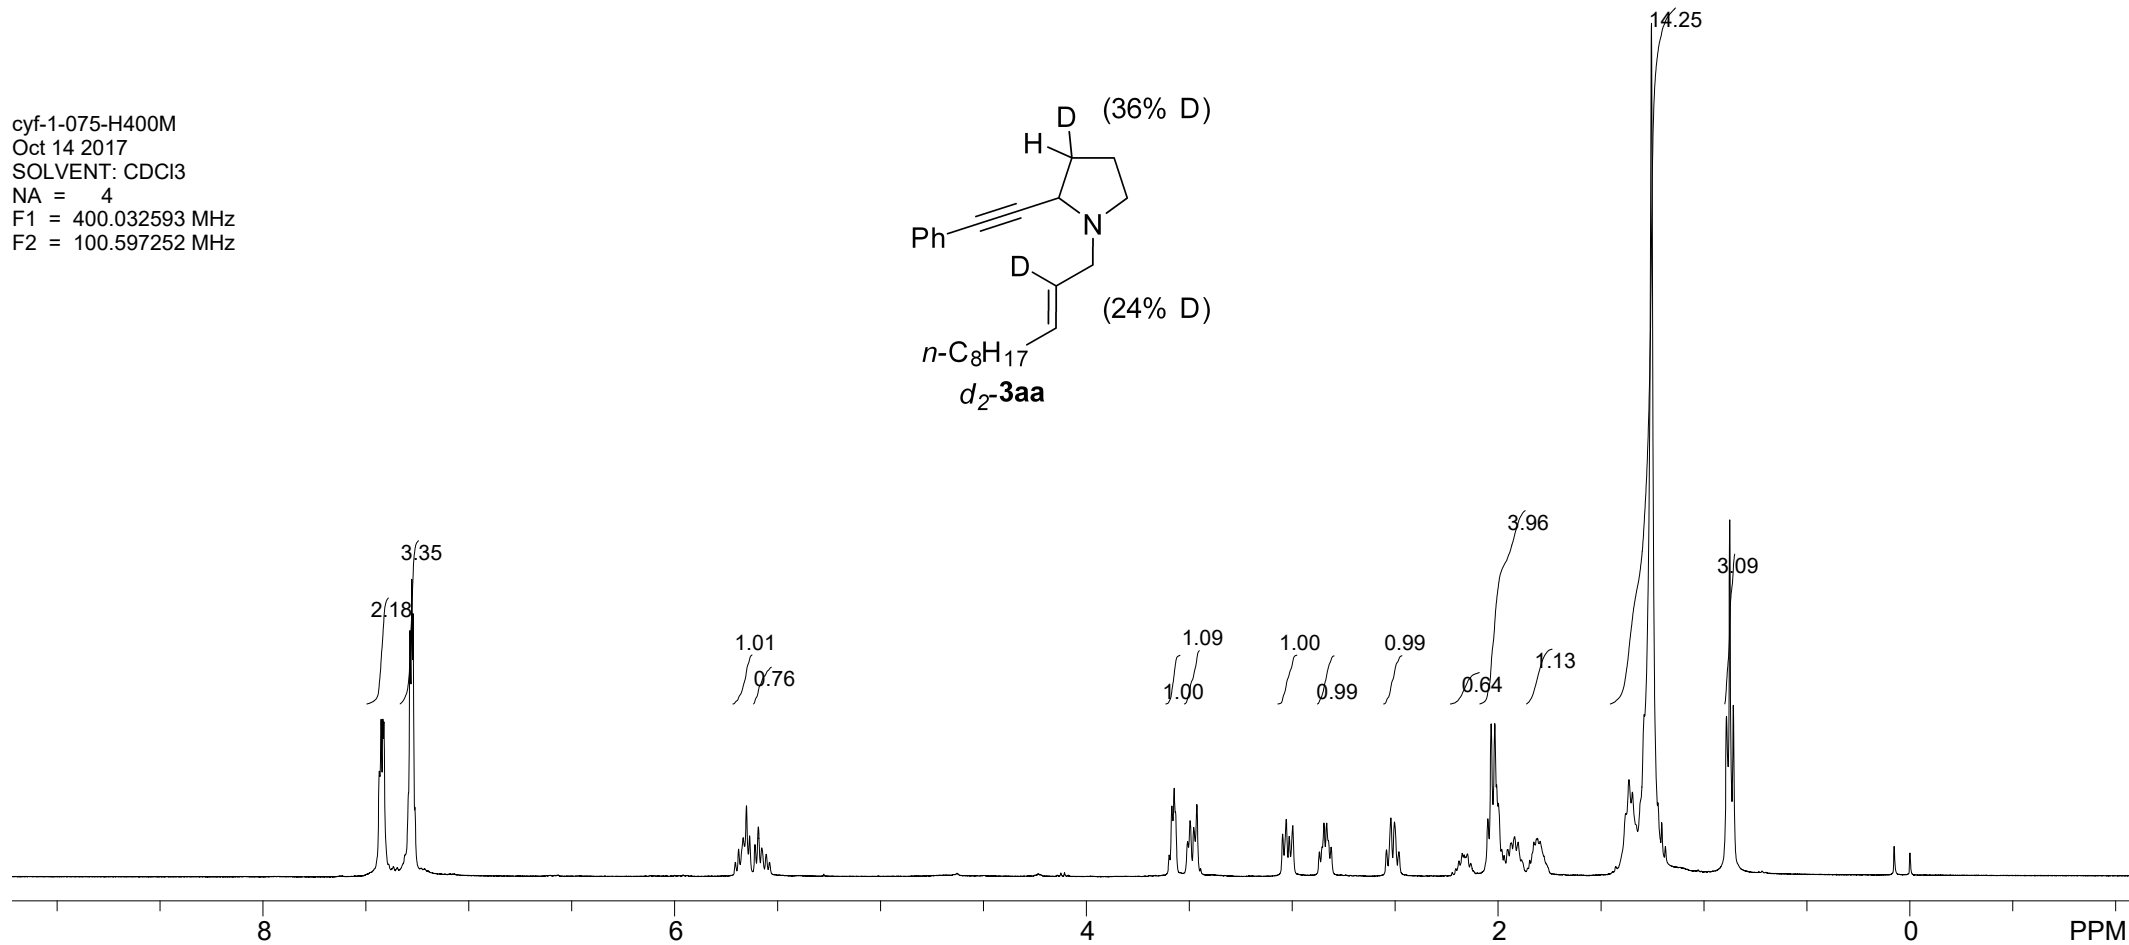

cyf-1-075-C100M-Bruker  
SOLVENT: CDCl<sub>3</sub>  
NA = 3072  
F1 = 100.605225 MHz  
F2 = 1.000000 MHz

134.122  
134.030  
131.647  
128.138  
127.824  
126.729  
123.373

88.714  
84.546

55.296  
55.189  
54.514  
54.453  
54.438  
54.377  
51.565  
32.328  
32.274  
31.845  
31.692  
31.577  
31.370  
31.179  
29.401  
29.248  
29.187  
29.118  
22.629  
21.977  
21.878  
21.778  
14.071

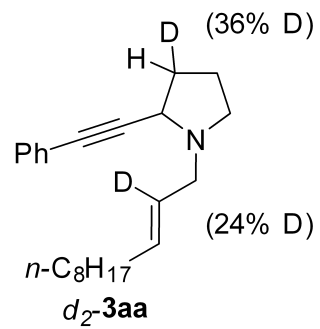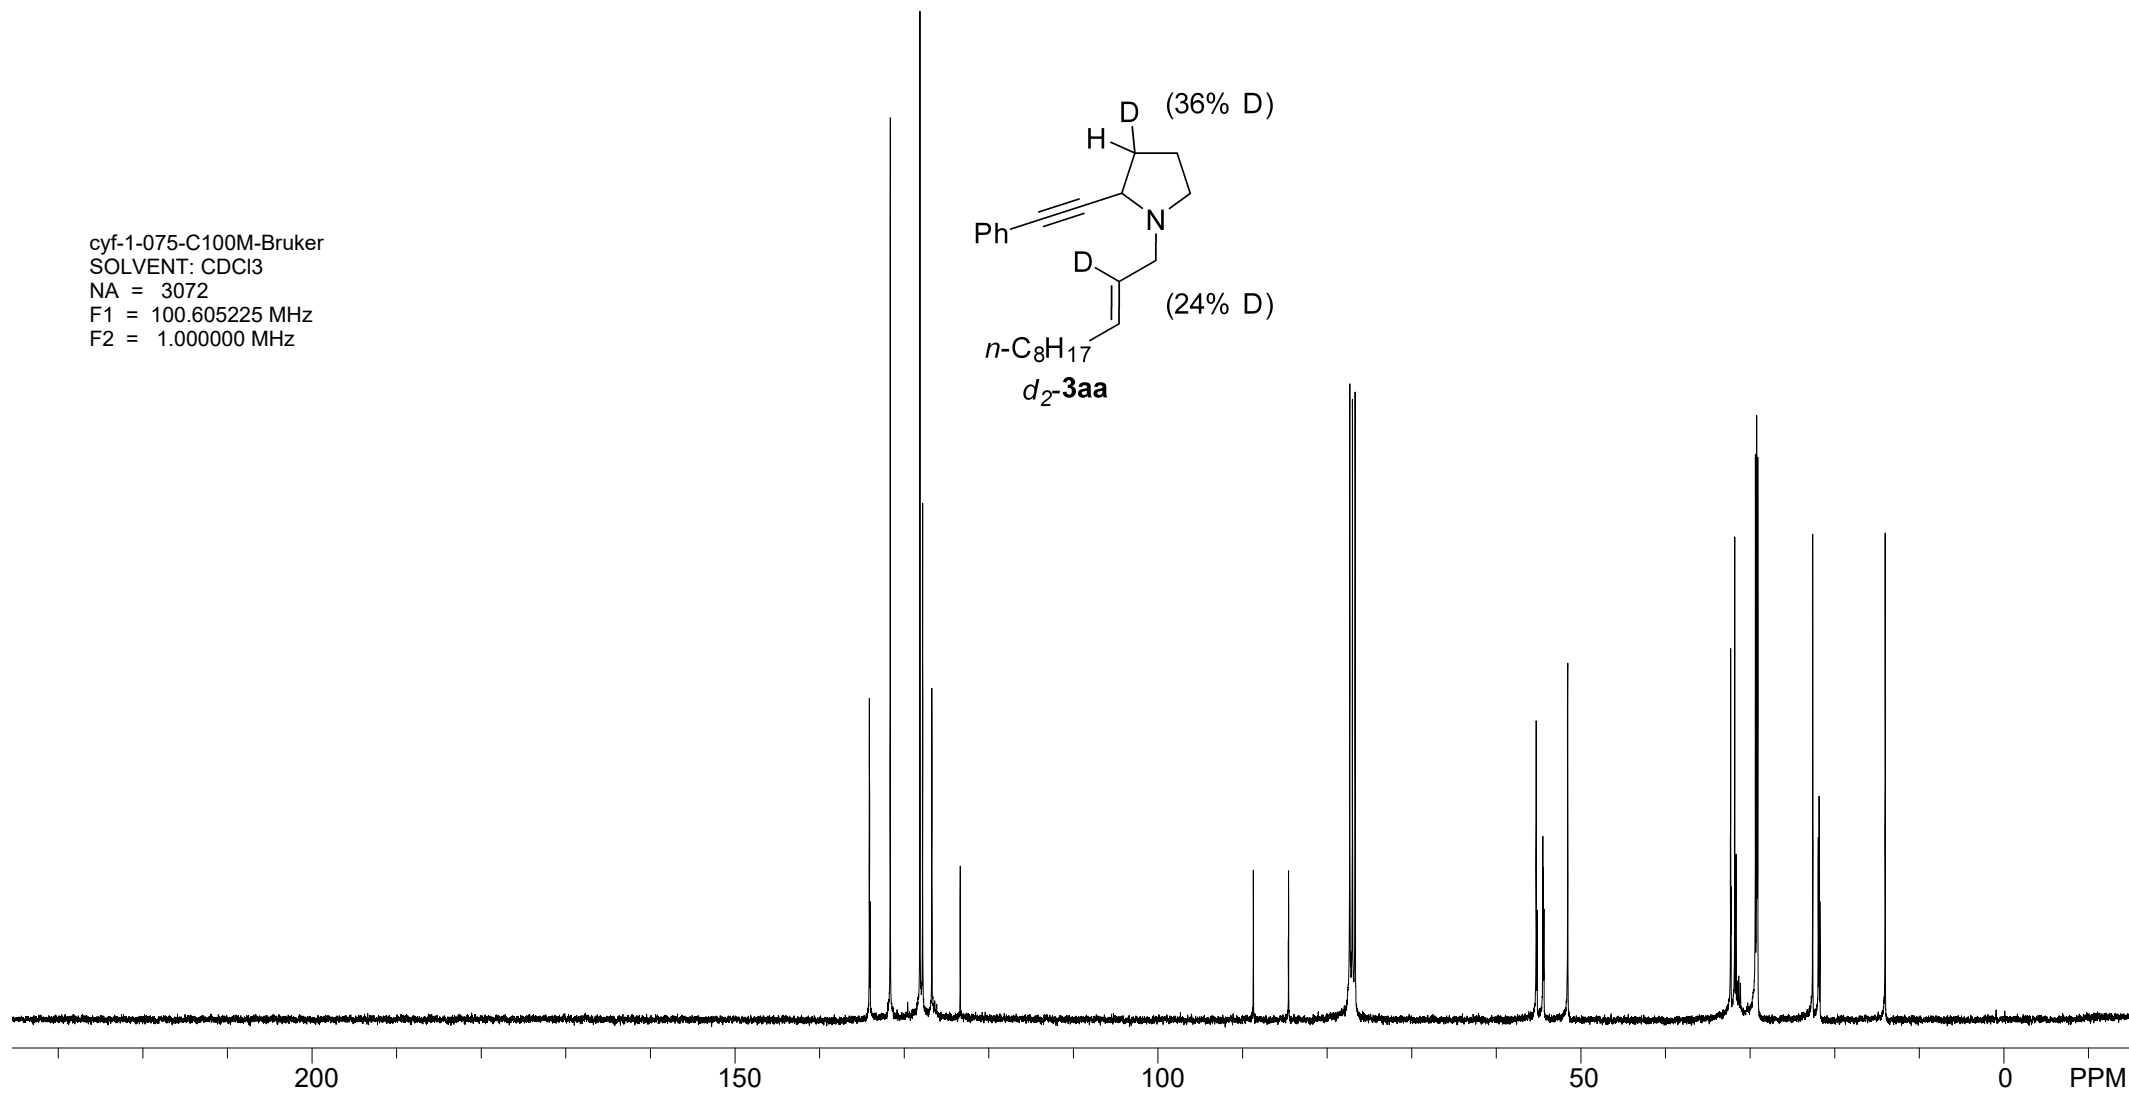

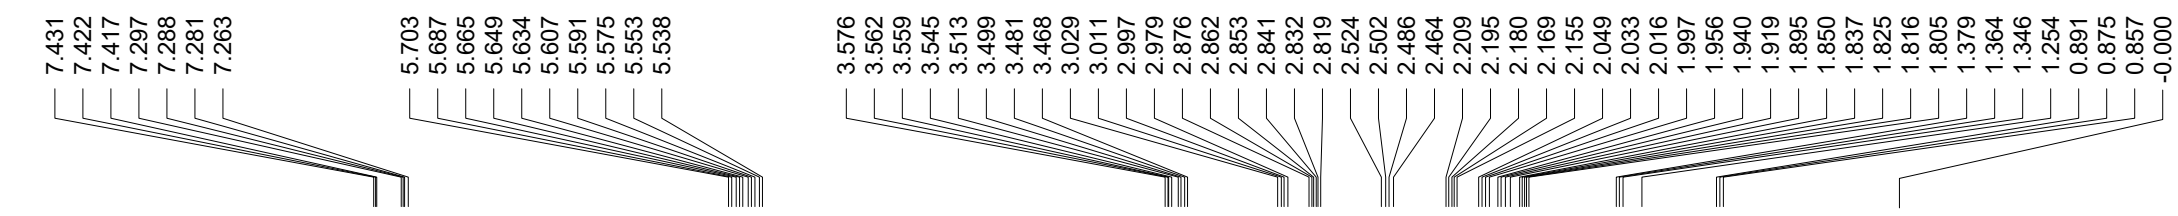

cyf-1-101-H400M  
Nov 20 2017  
SOLVENT: CDCl3  
NA = 12  
F1 = 399.722809 MHz  
F2 = 100.519203 MHz

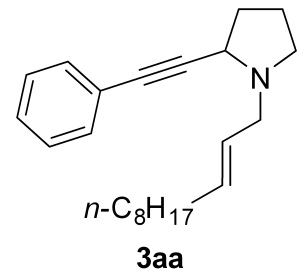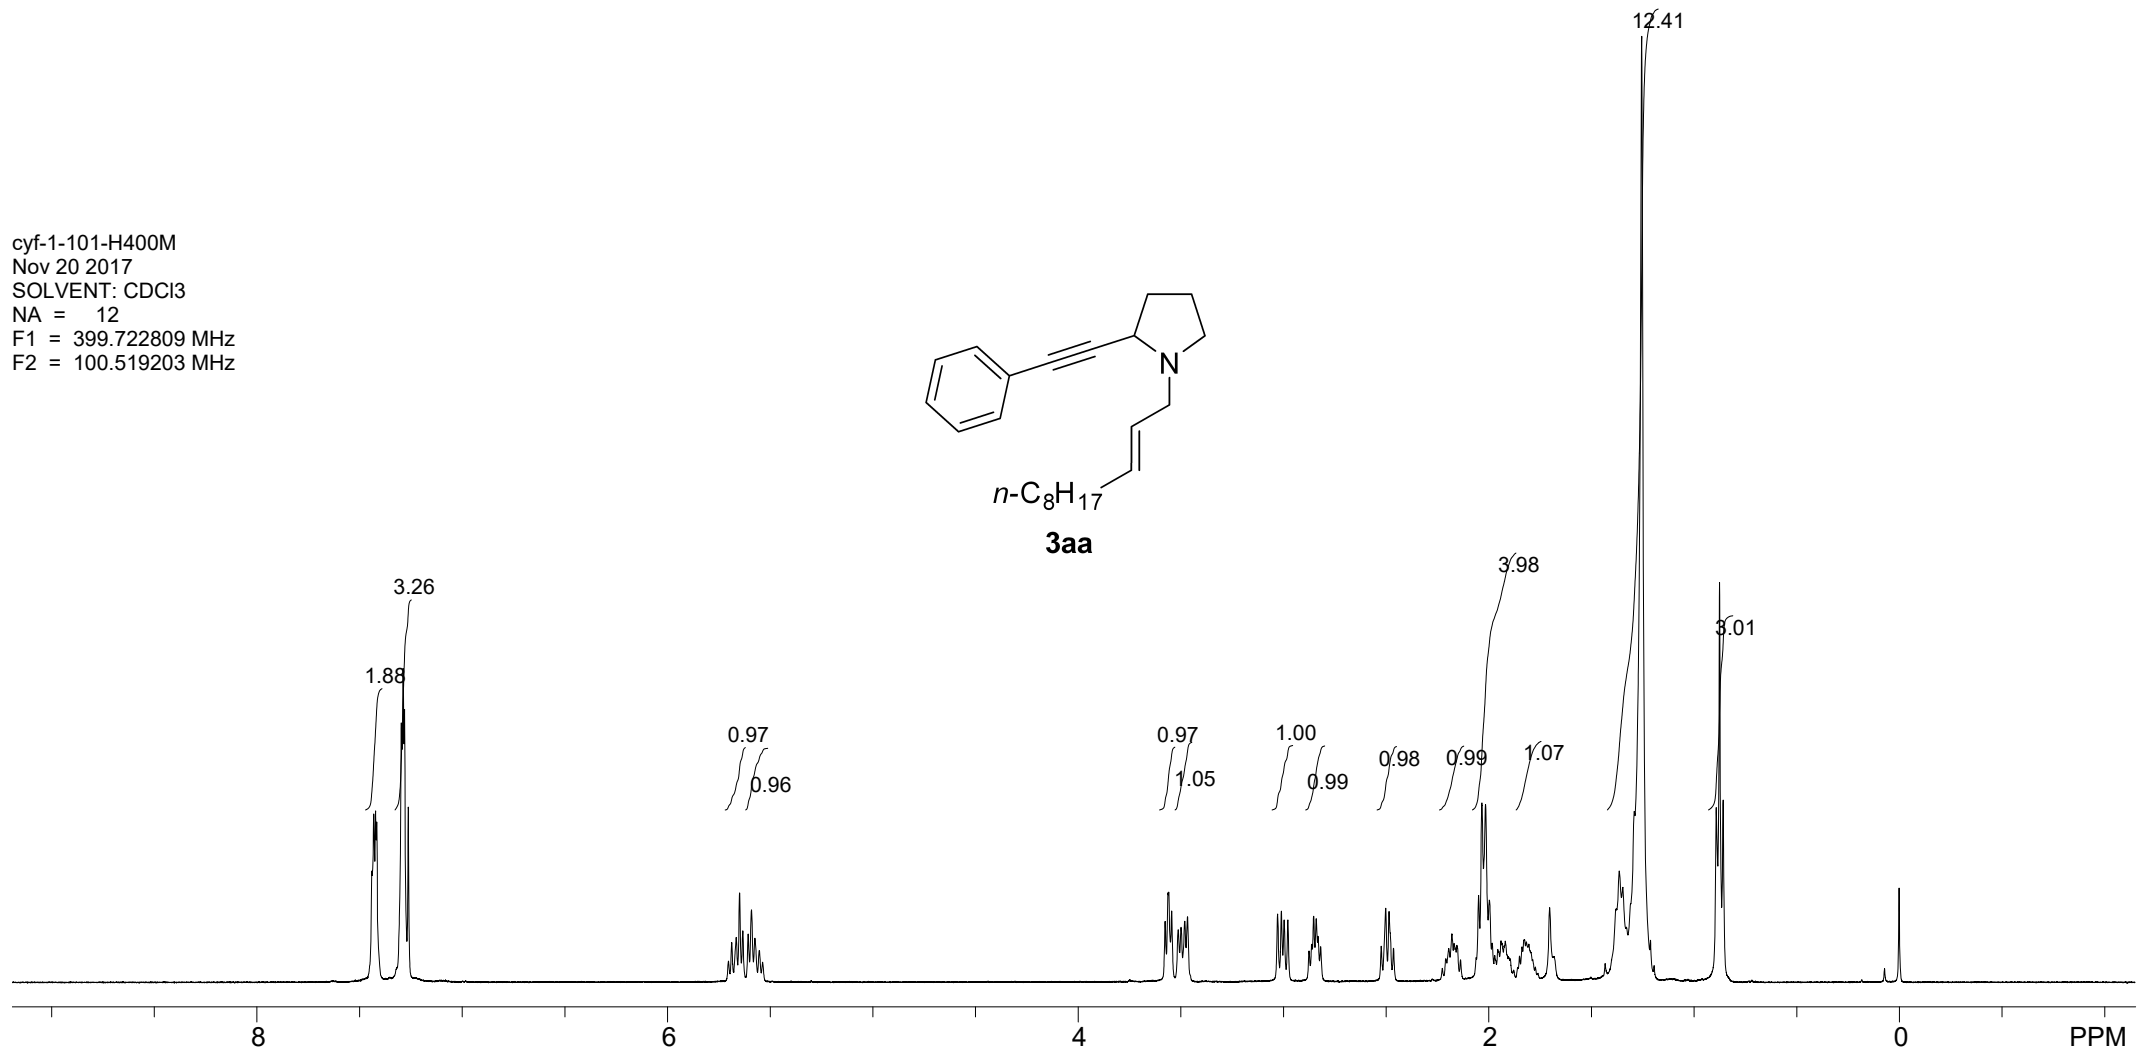

134.099  
131.632  
128.117  
127.806  
126.713  
123.350

88.713  
84.523  
77.319  
77.000  
76.681

55.305  
54.516  
51.570

32.320  
31.834  
31.682  
29.397  
29.238  
29.177  
29.109  
22.626  
21.966  
14.064

cyf-1-101-C100M  
Nov 17 2017  
SOLVENT: CDCl3  
NA = 100  
F1 = 100.520737 MHz  
F2 = 399.722015 MHz

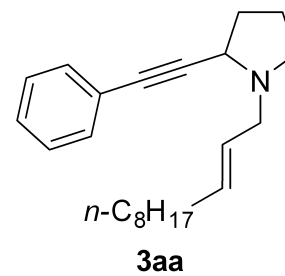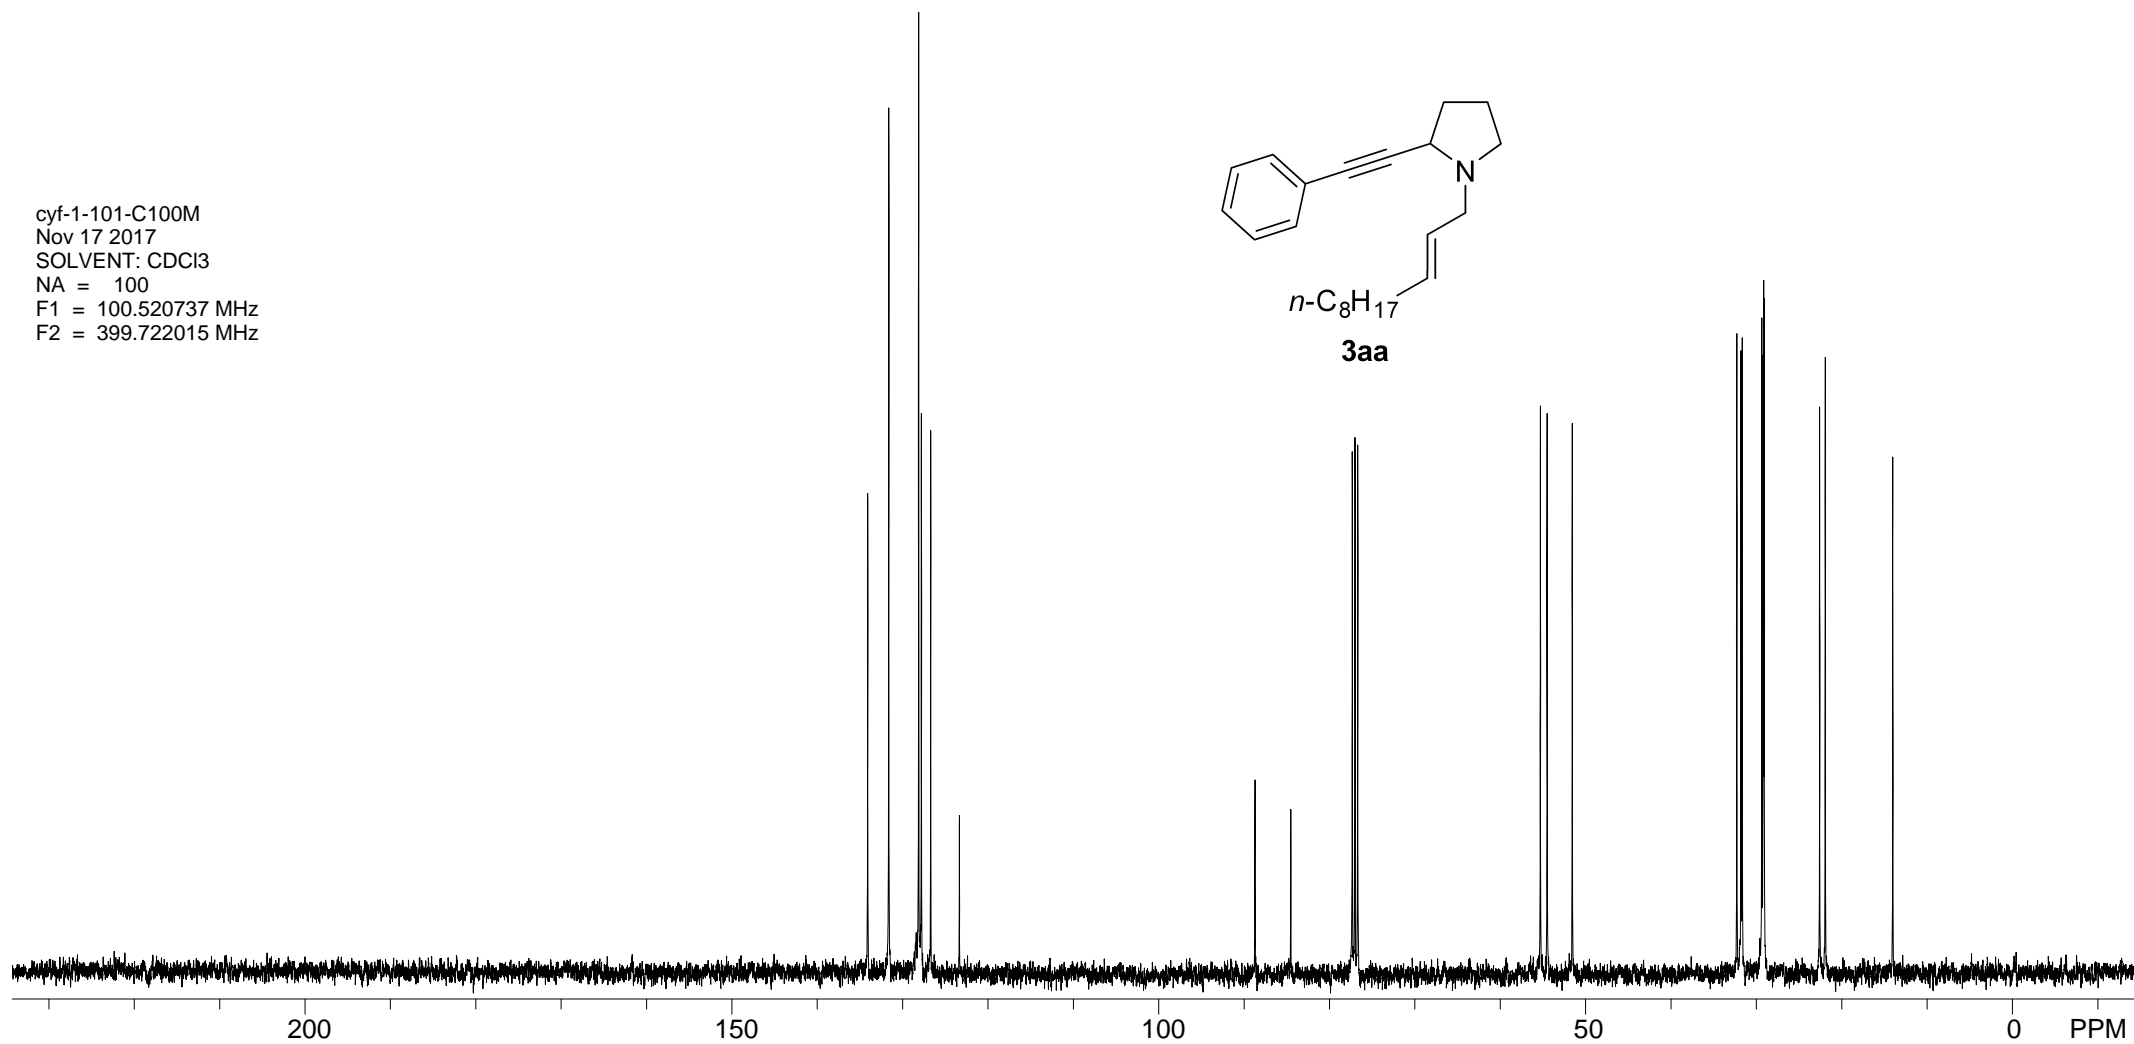



cyf-1-051-H400M  
Aug 31 2017  
SOLVENT: CDCl3  
NA = 4  
F1 = 399.722809 MHz  
F2 = 100.519203 MHz

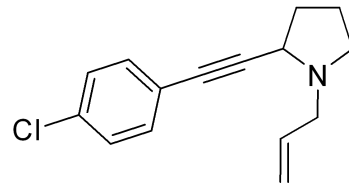

3ee

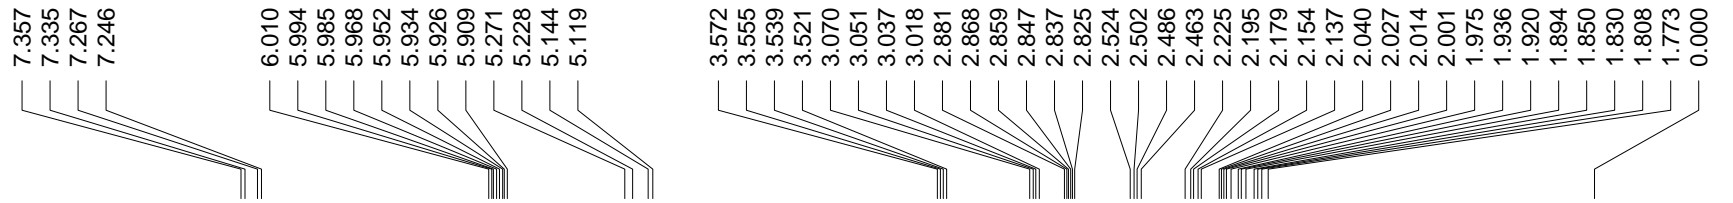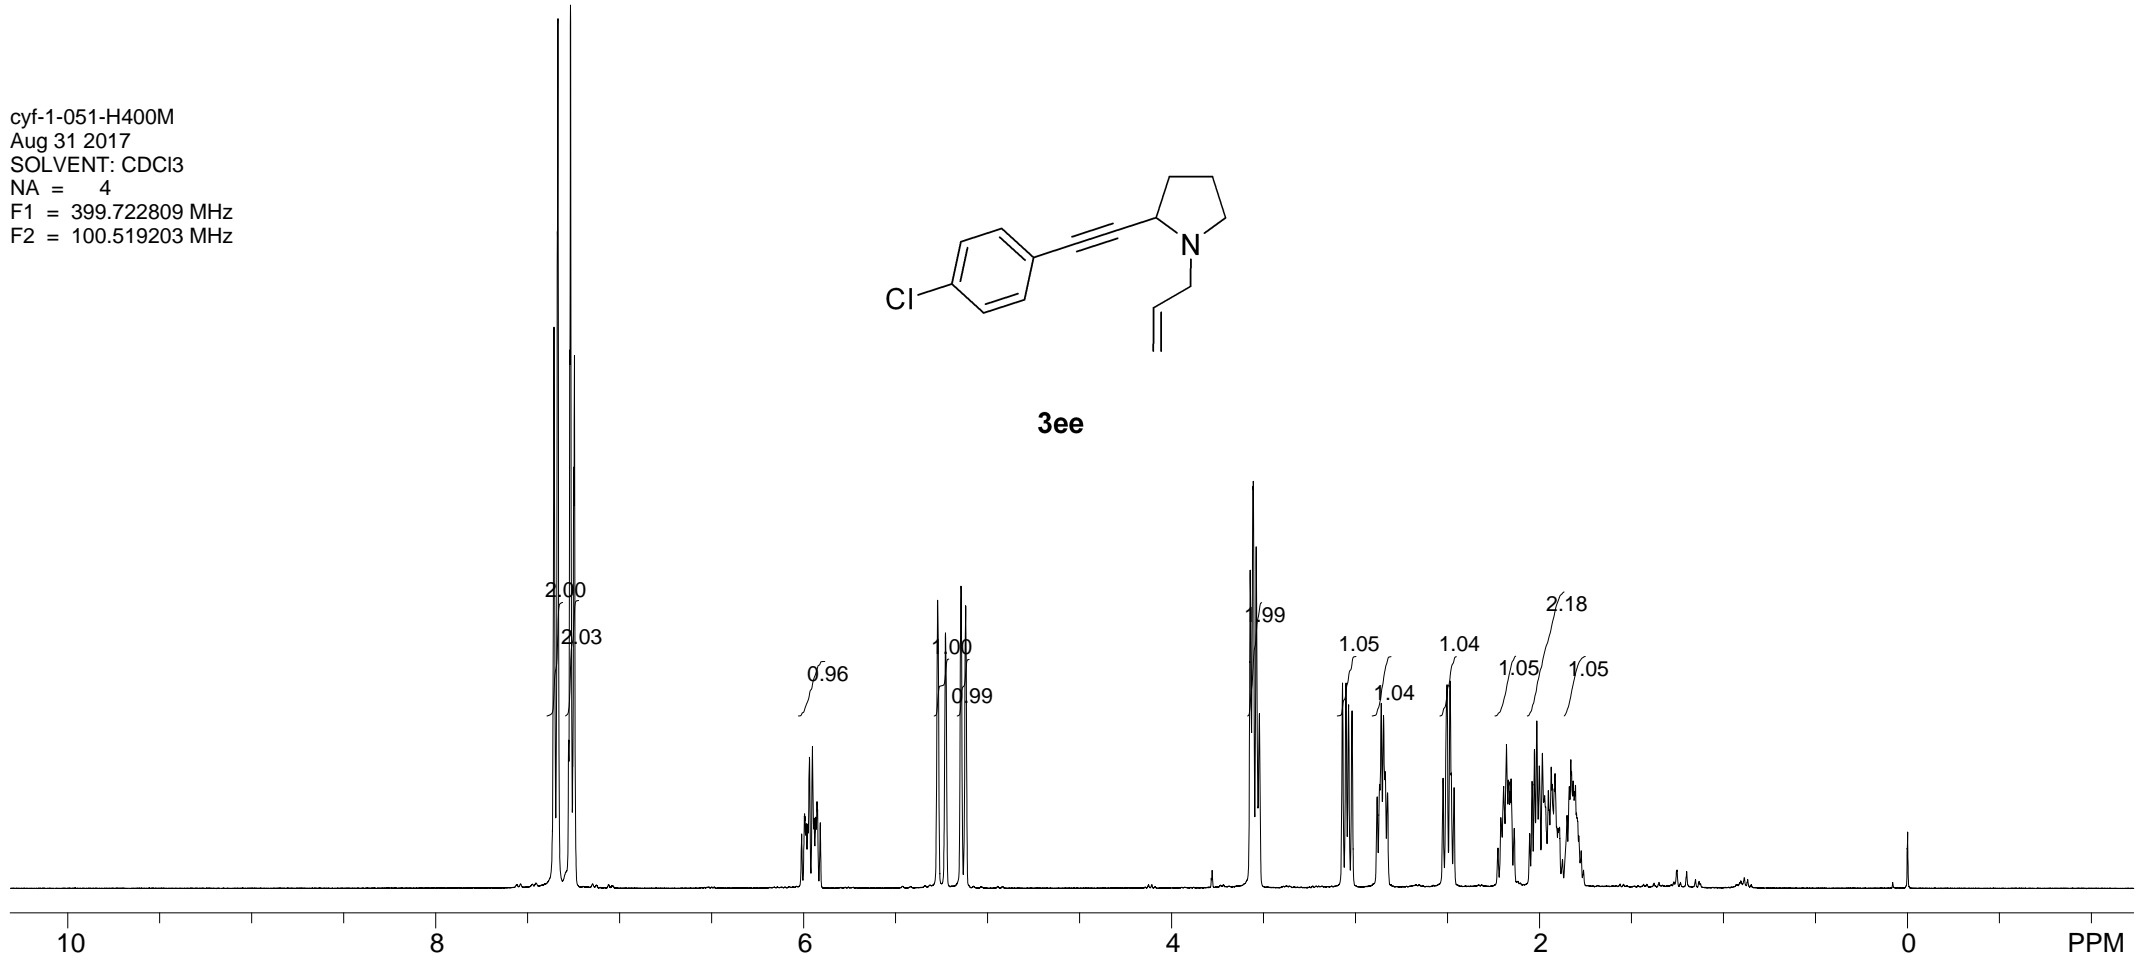

cyf-1-051-C100M-Bruker  
Aug 31 2017  
SOLVENT: CDCl3  
NA = 65  
F1 = 100.630371 MHz  
F2 = 1.000000 MHz

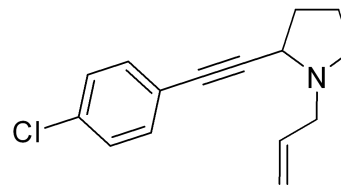

3ee

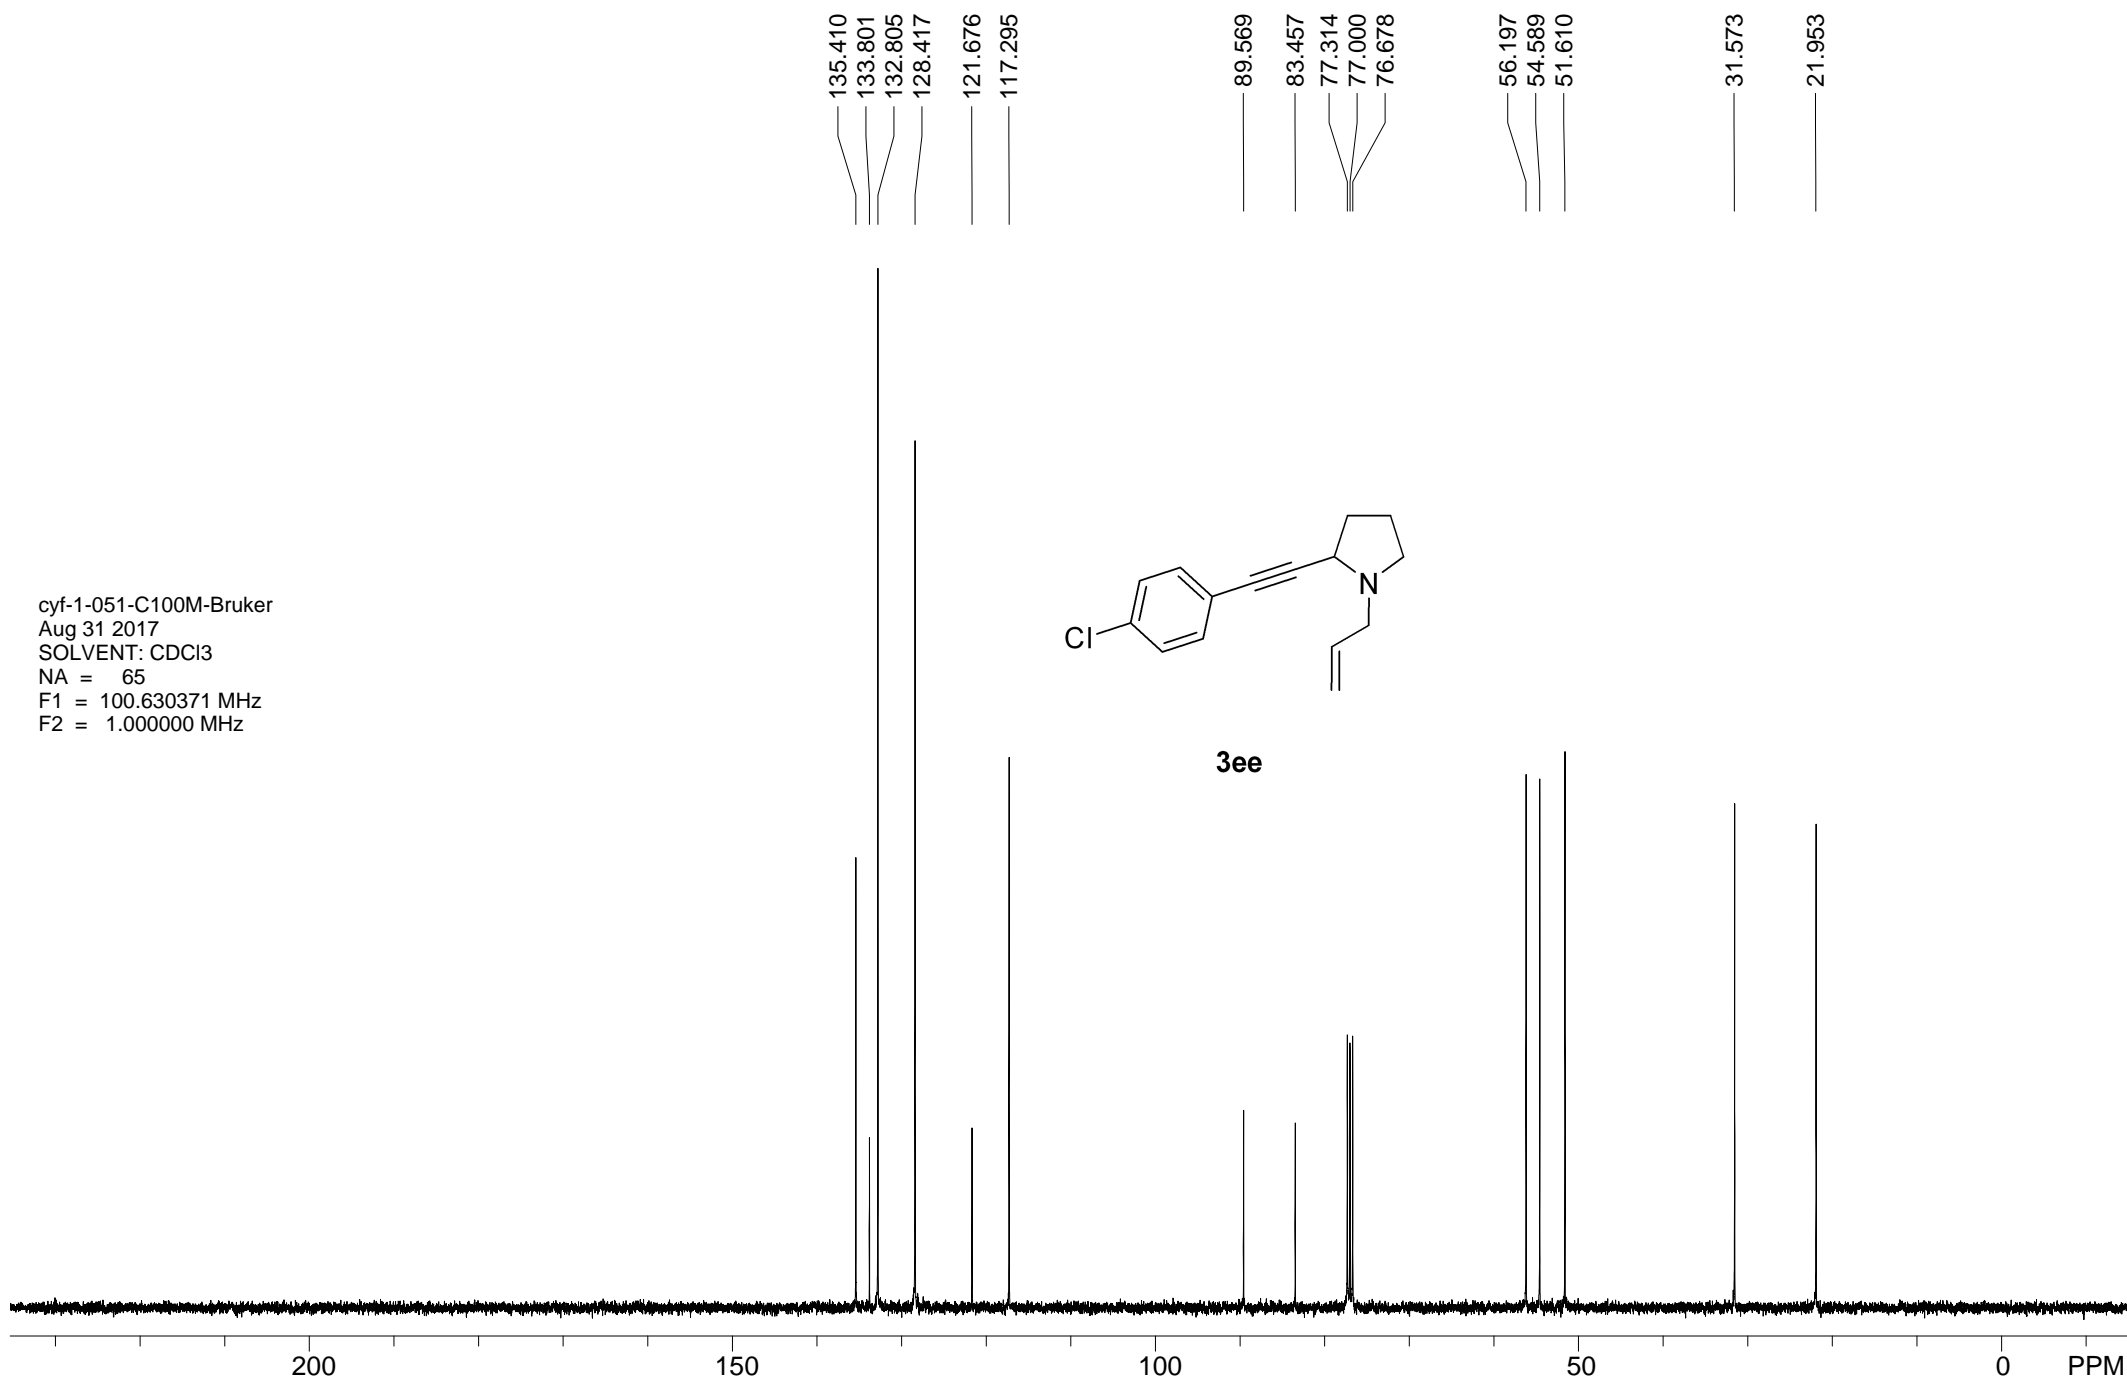

cyf-1-069-H400M  
Oct 11 2017  
SOLVENT: CDCl3  
NA = 8  
F1 = 400.100067 MHz  
F2 = 1.000000 MHz

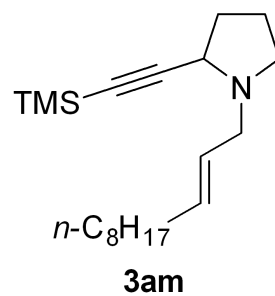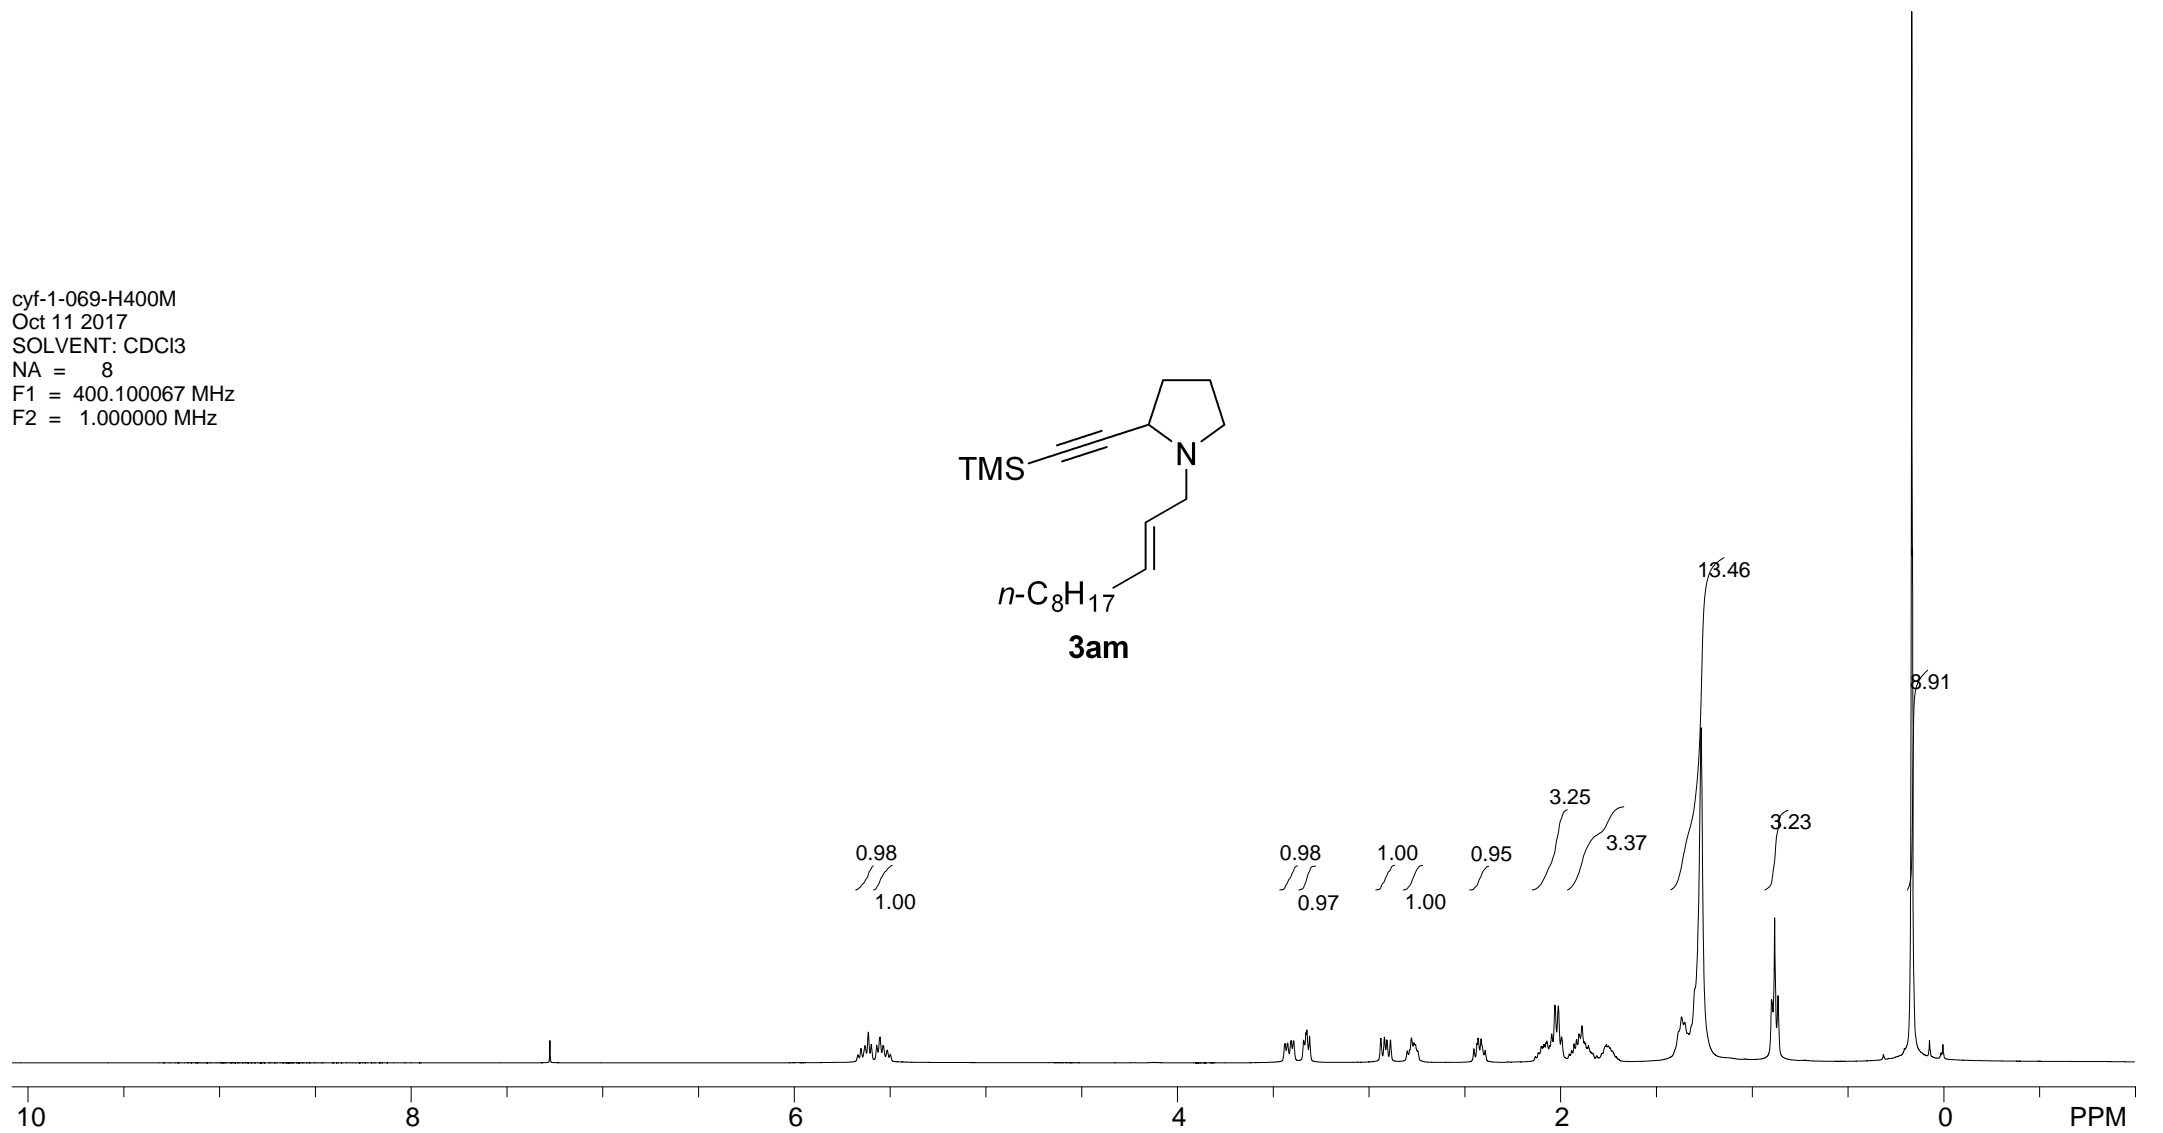

cyf-1-069-C400M  
Oct 11 2017  
SOLVENT: CDCl3  
NA = 256  
F1 = 100.605240 MHz  
F2 = 1.000000 MHz

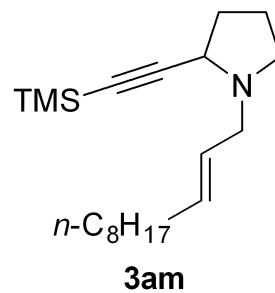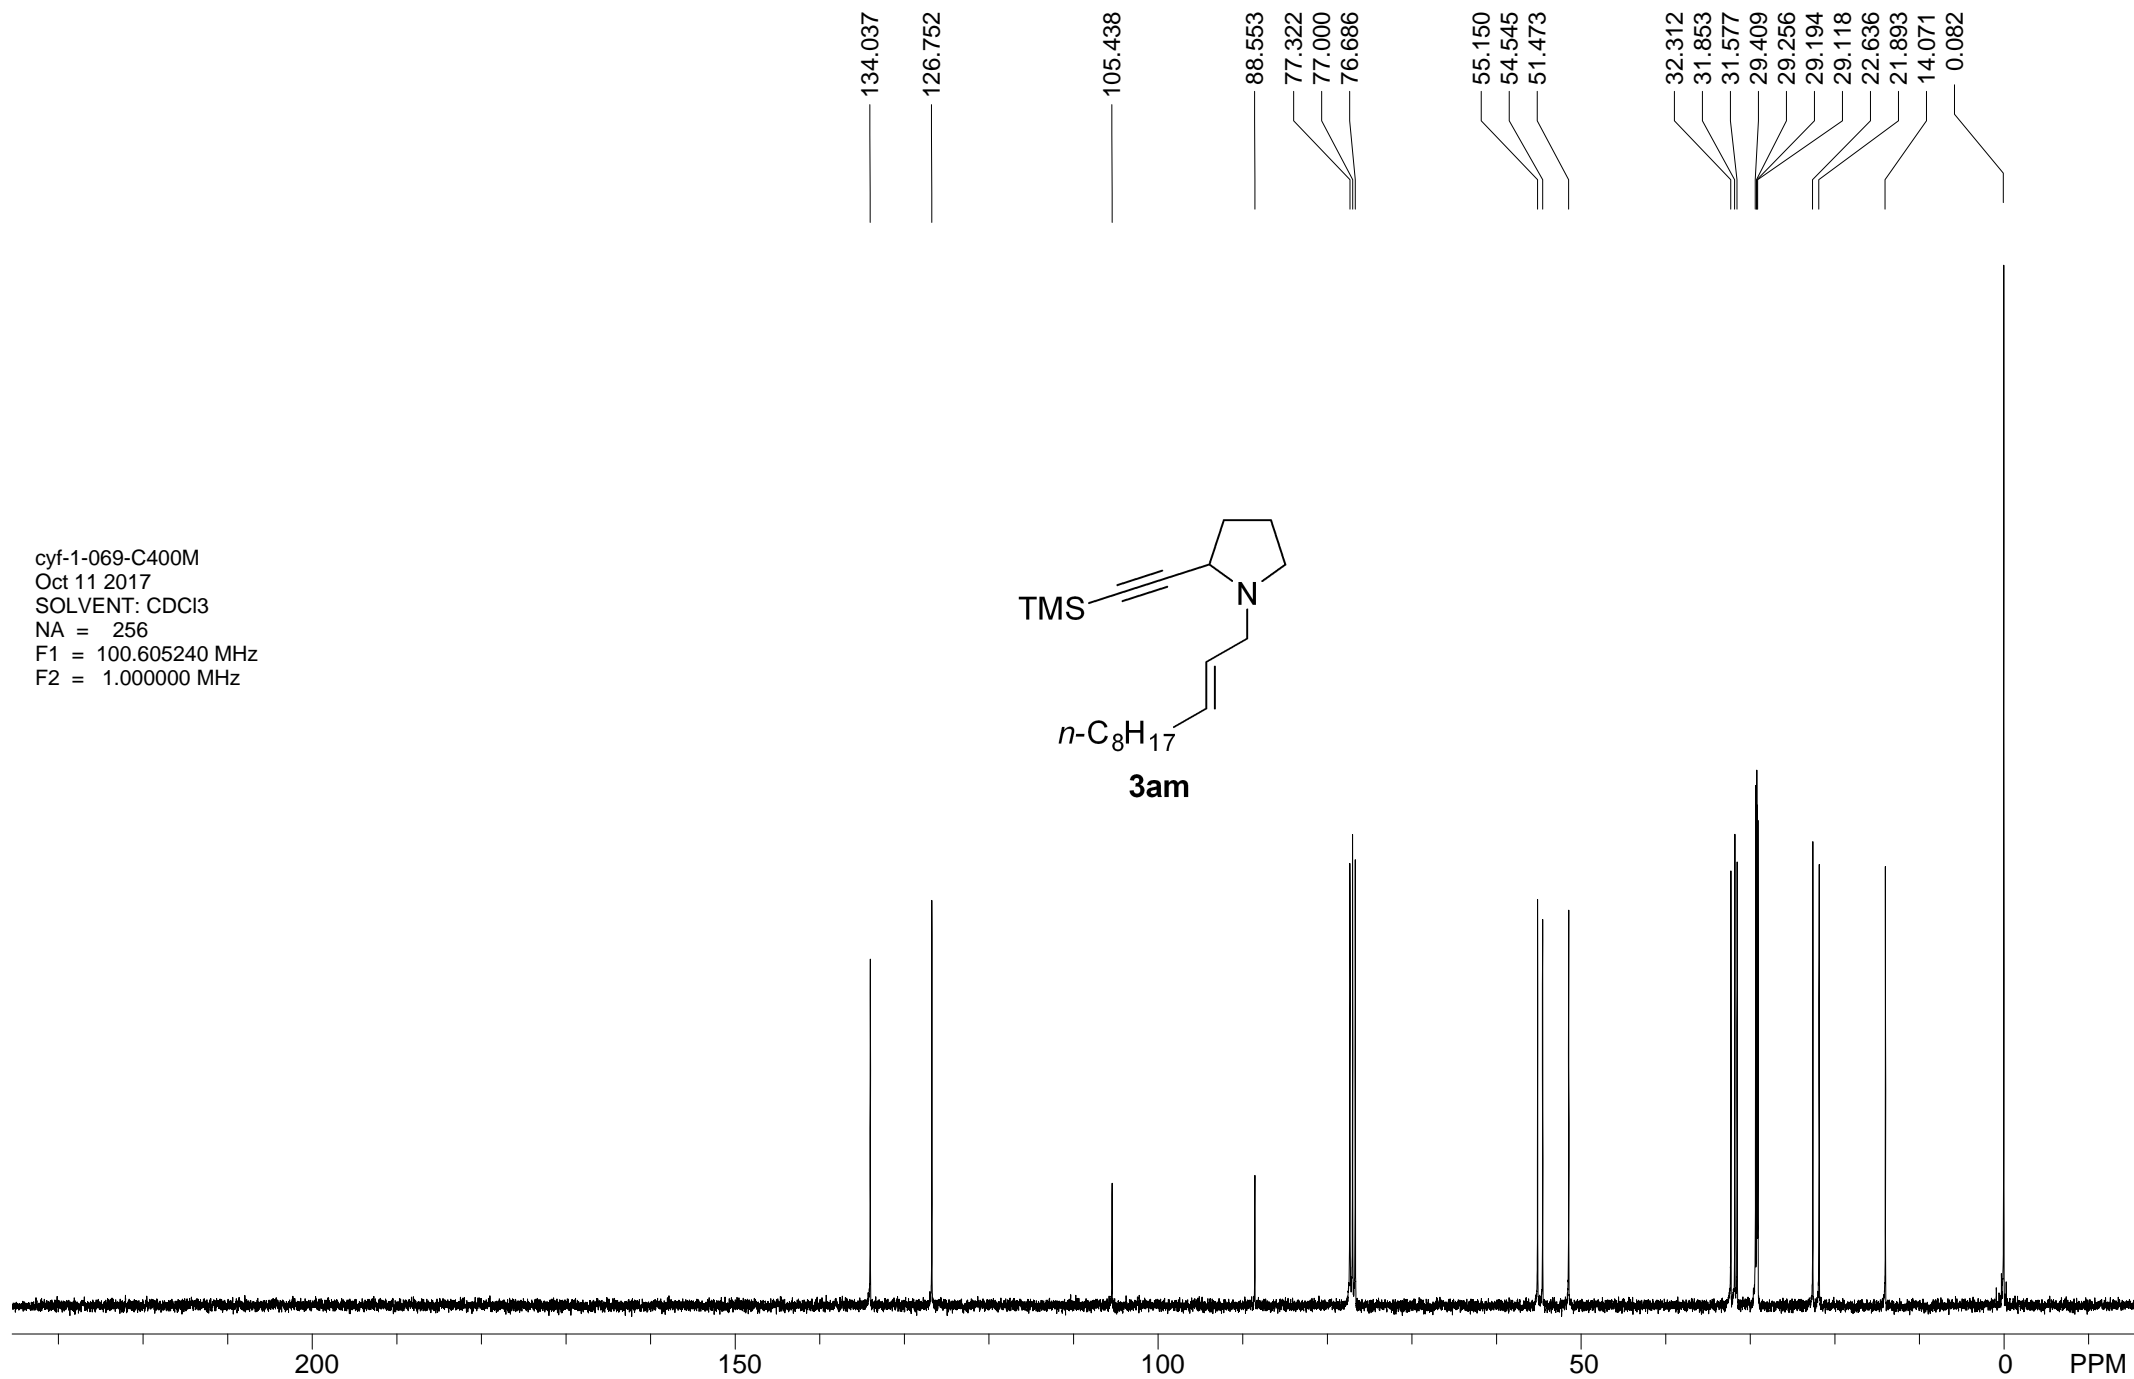

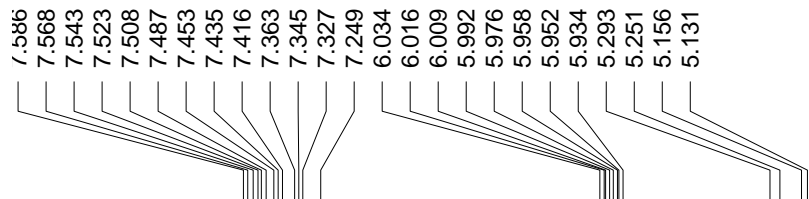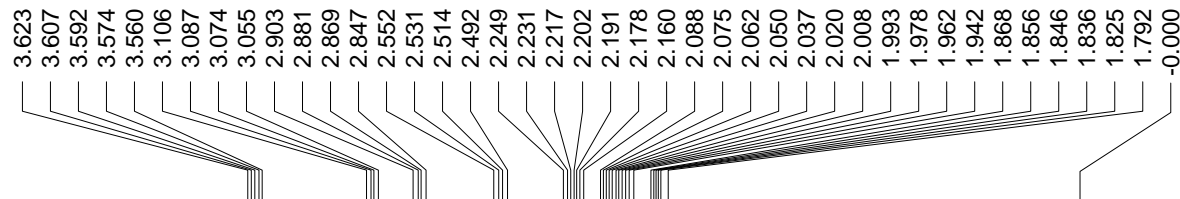

cyf-1-081-H400M  
Jan 22 2018  
SOLVENT: CDCl3  
NA = 16  
F1 = 399.722809 MHz  
F2 = 100.519203 MHz

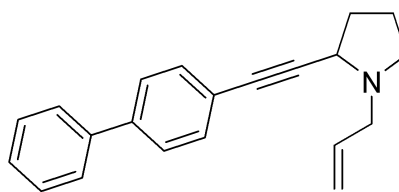

5

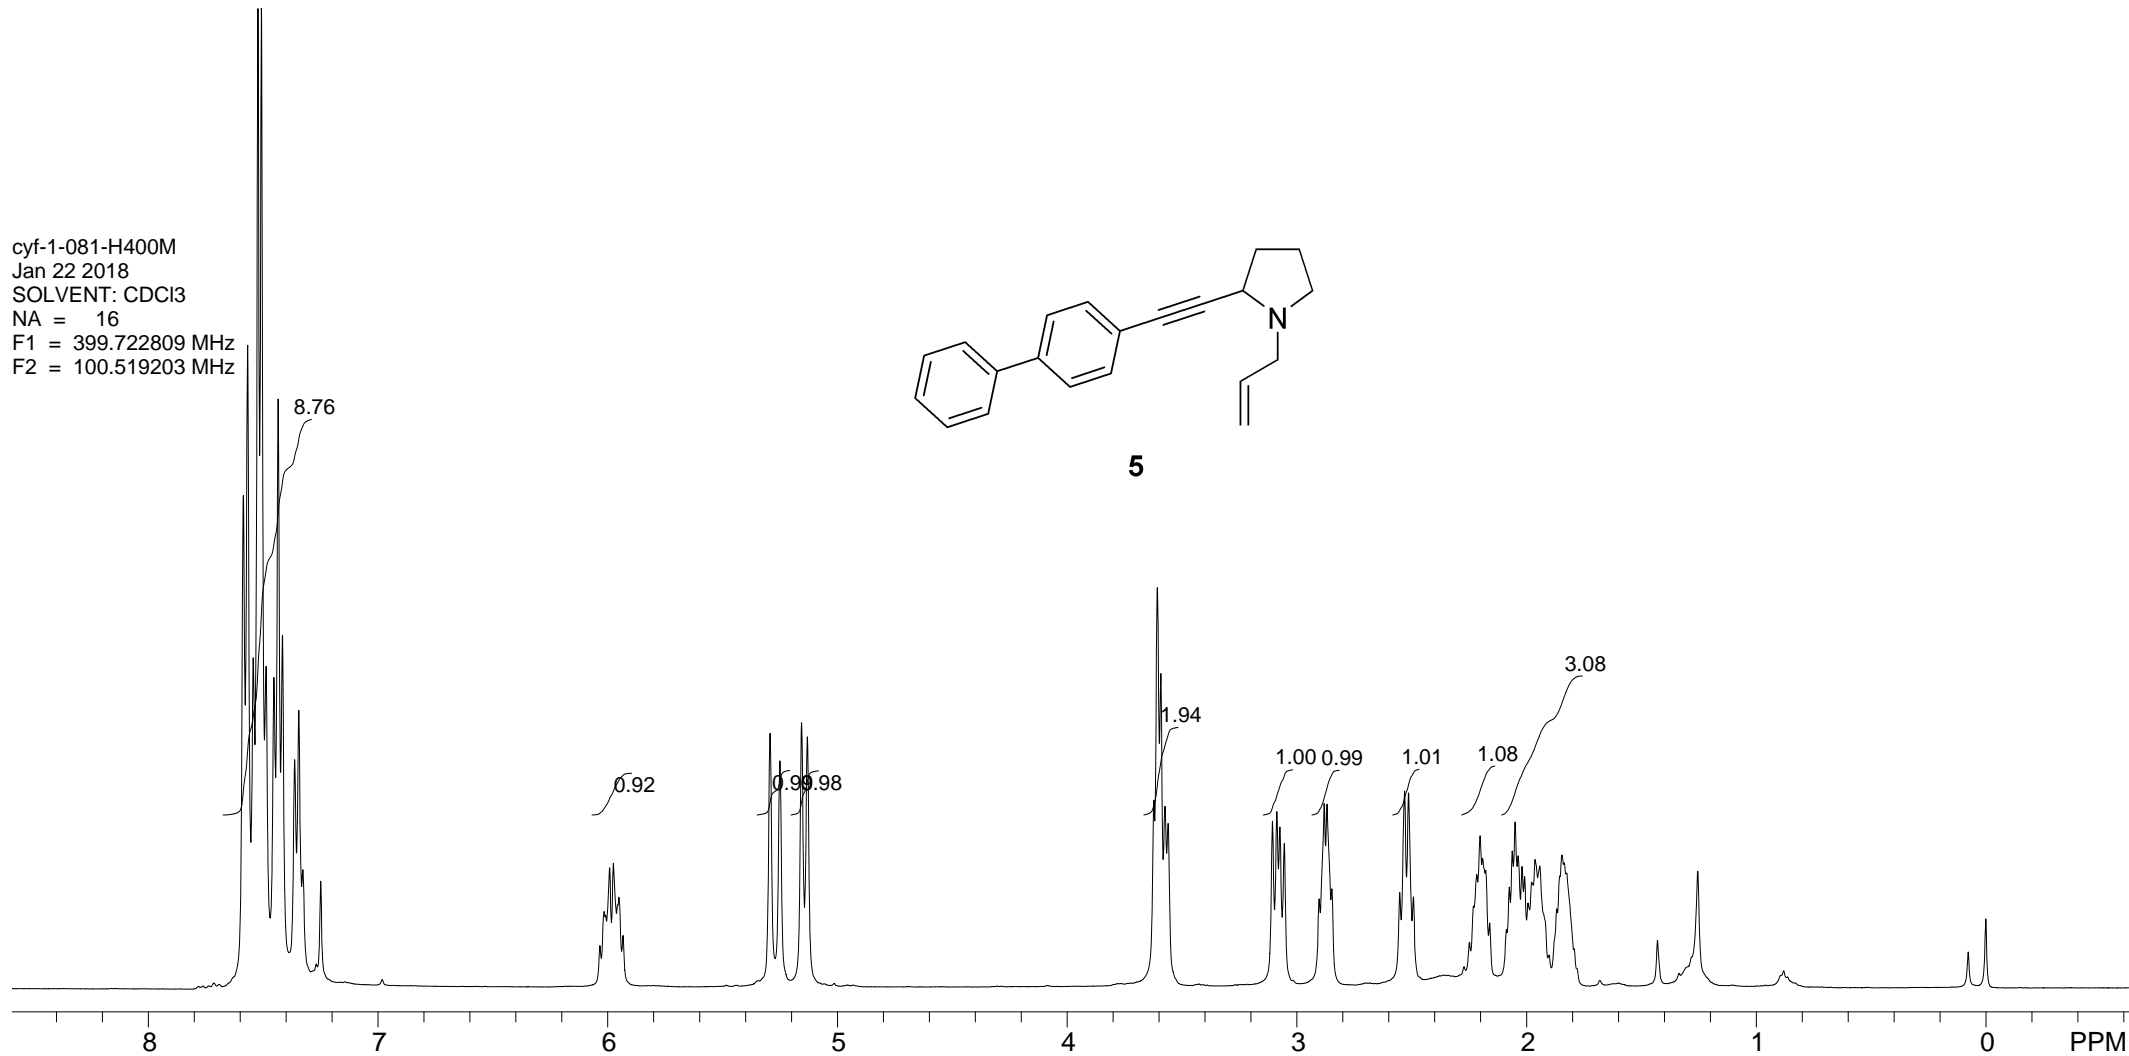

cyf-1-081-C100M-Agilent  
Oct 23 2017  
SOLVENT: CDCl<sub>3</sub>  
NA = 280  
F1 = 100.520737 MHz  
F2 = 399.722015 MHz

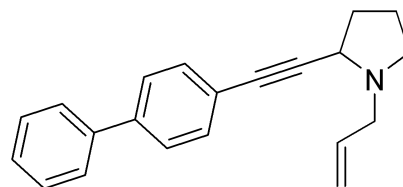

5

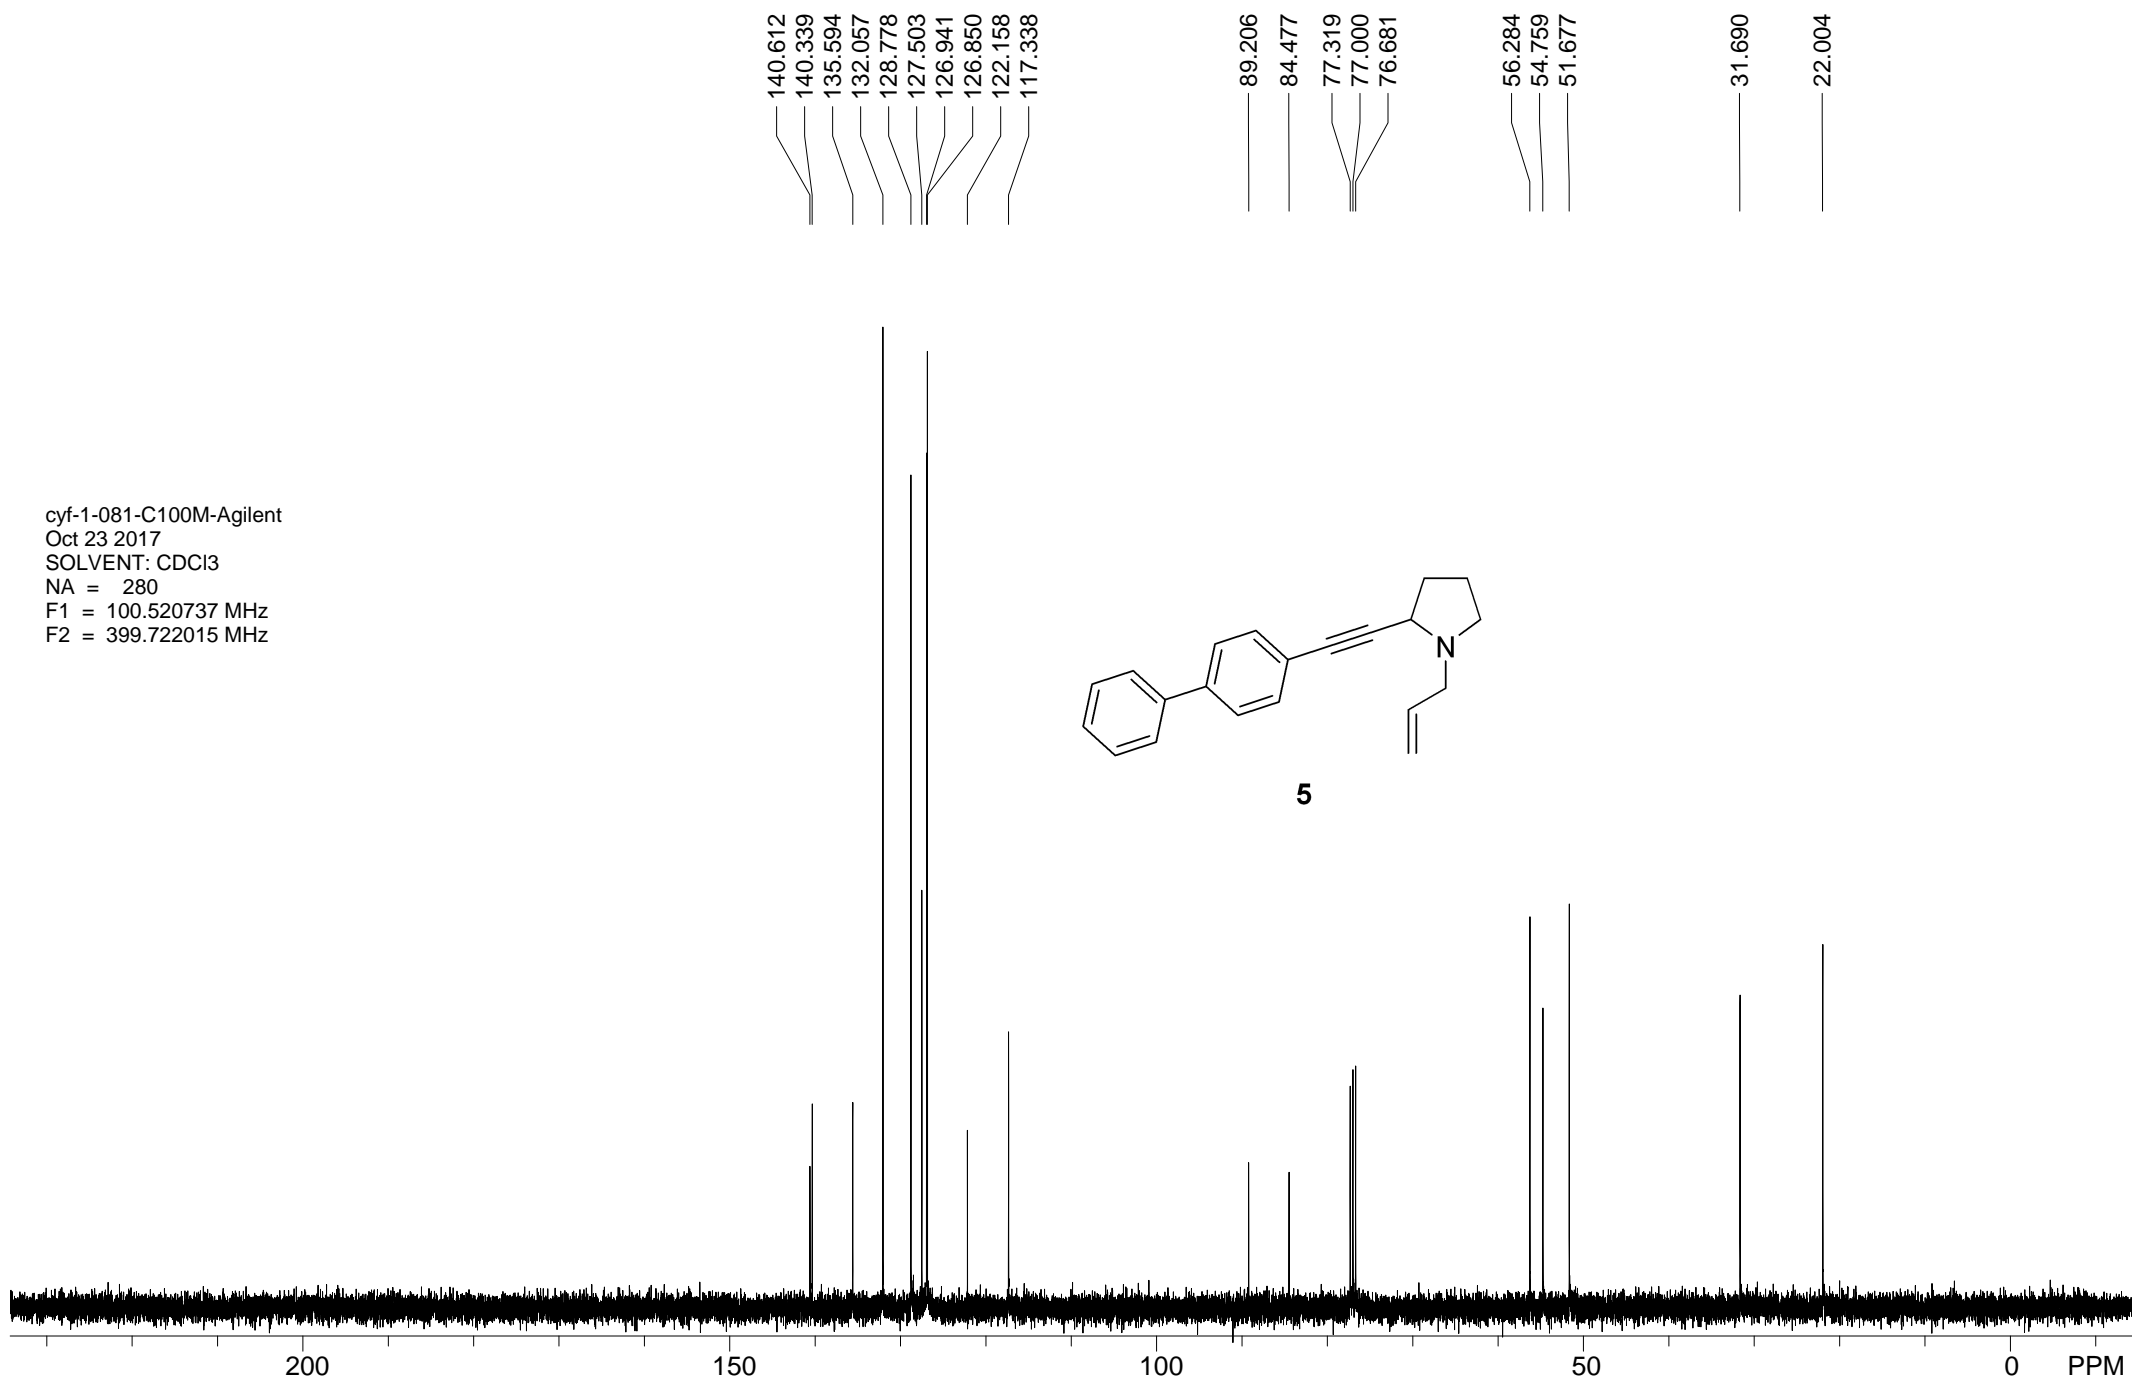

cyf-1-087-H400M  
Oct 28 2017  
SOLVENT: CDCl3  
NA = 4  
F1 = 399.722809 MHz  
F2 = 100.519203 MHz

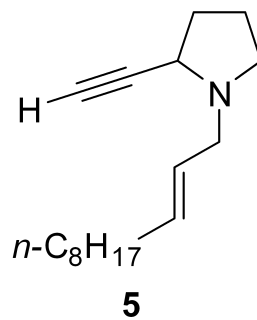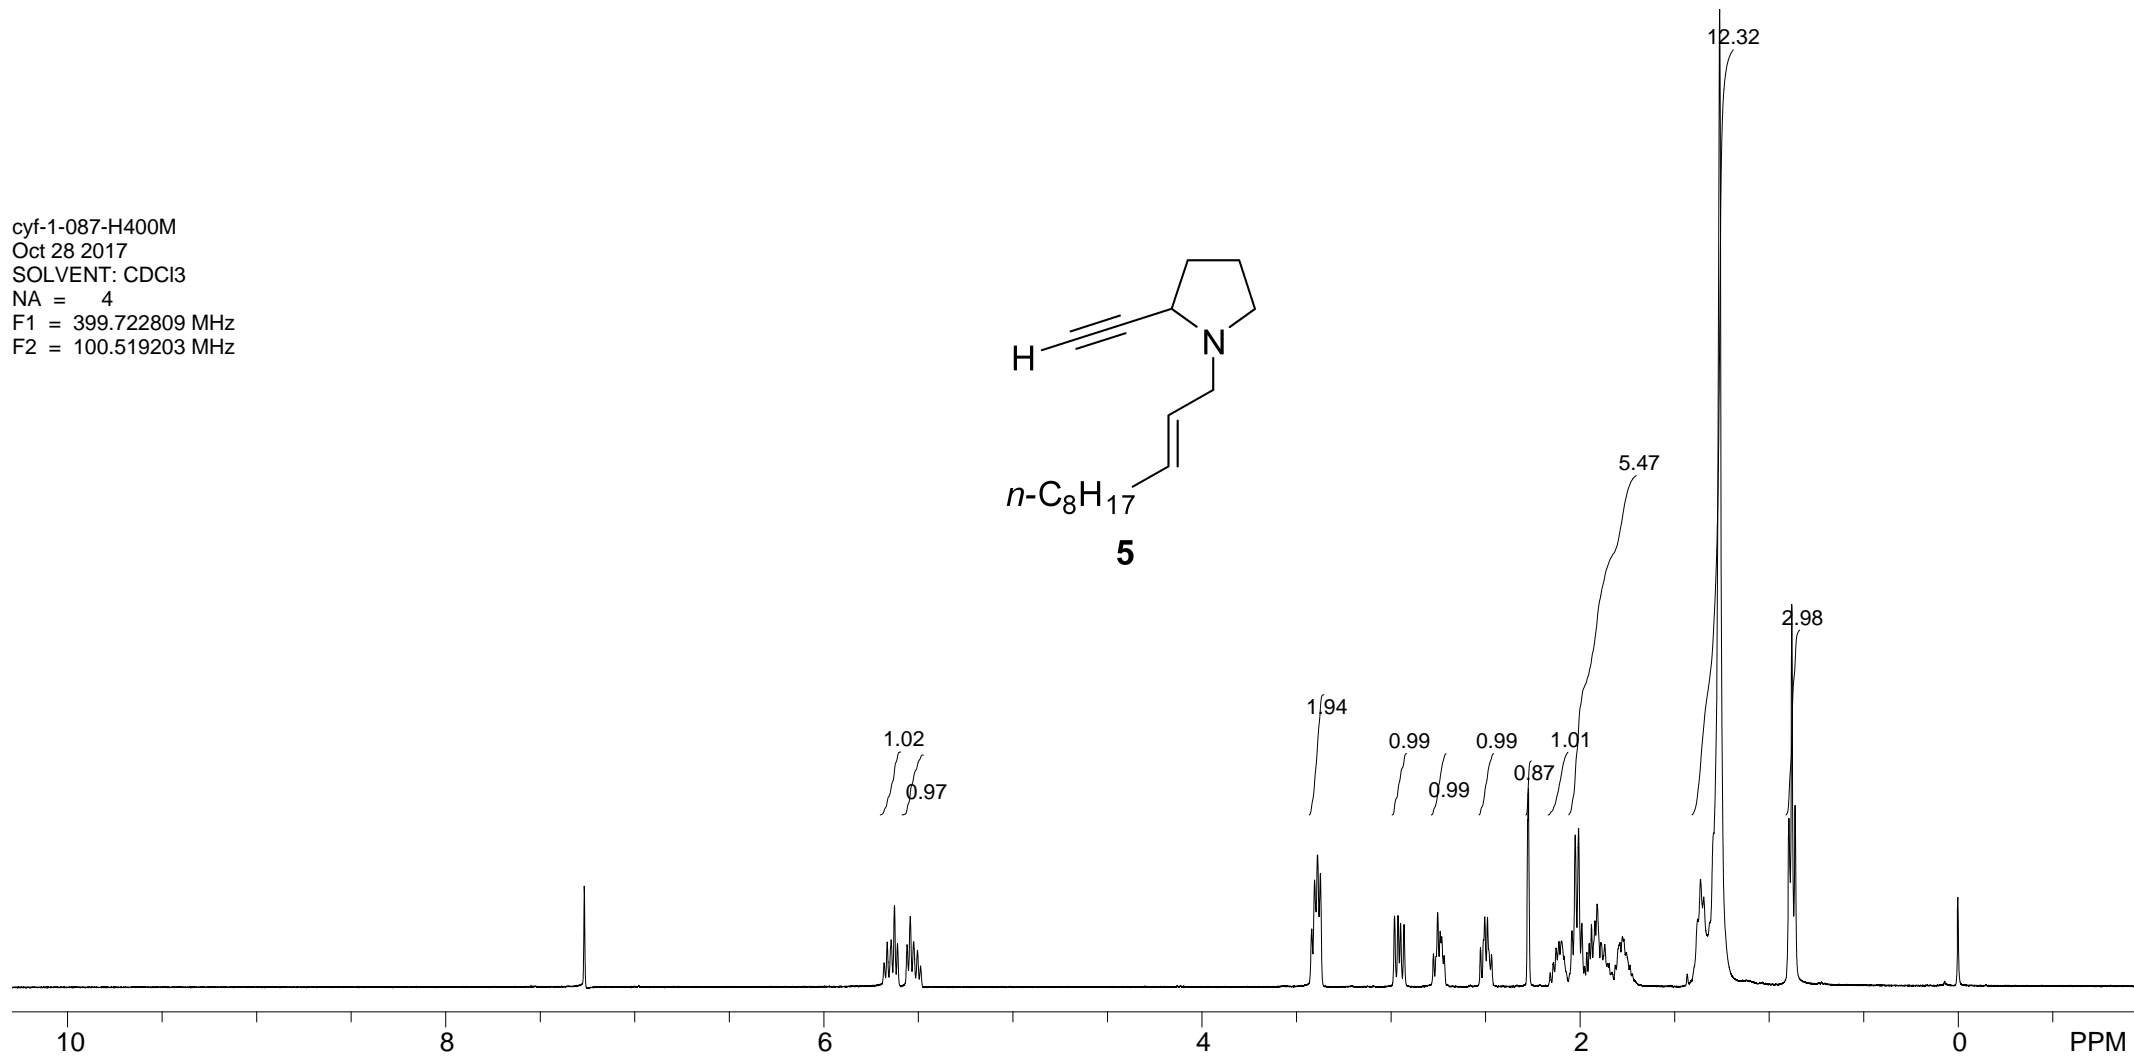

cyf-1-087-C100M  
Oct 28 2017  
SOLVENT: CDCl3  
NA = 120  
F1 = 100.520737 MHz  
F2 = 399.722015 MHz

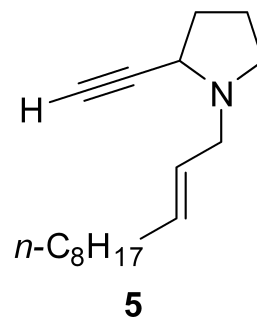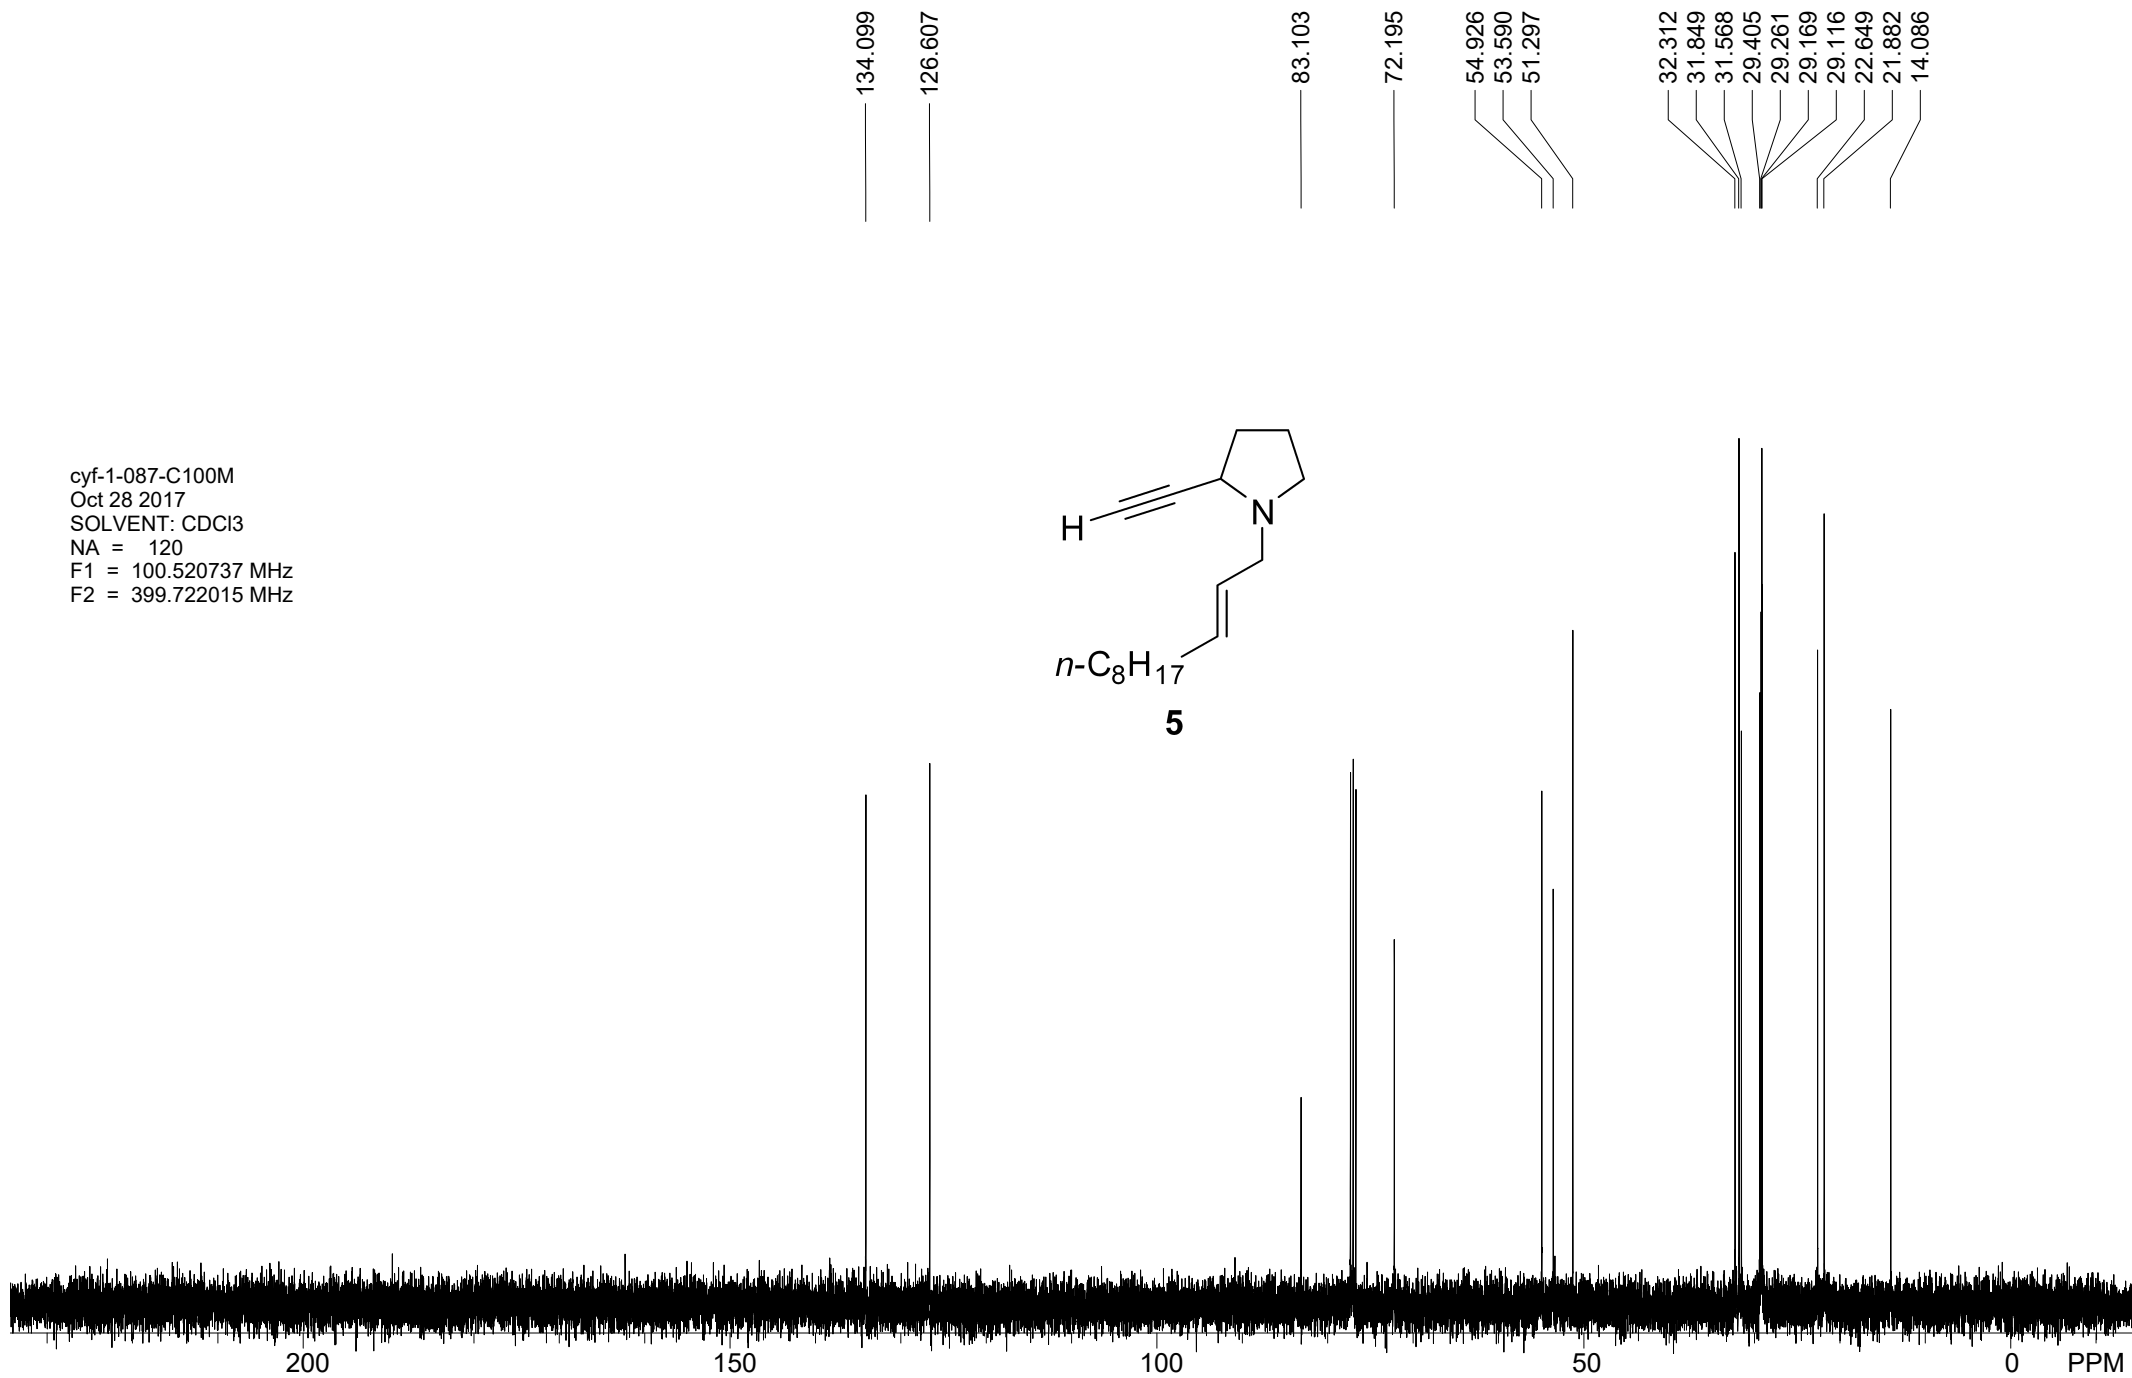



cyf-1-120B-H400M  
Dec 8 2017  
SOLVENT: CDCl3  
NA = 8  
F1 = 399.722809 MHz  
F2 = 100.519203 MHz

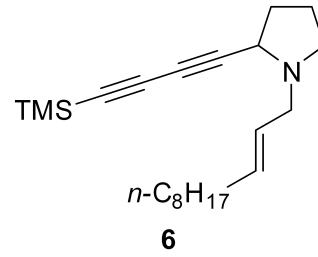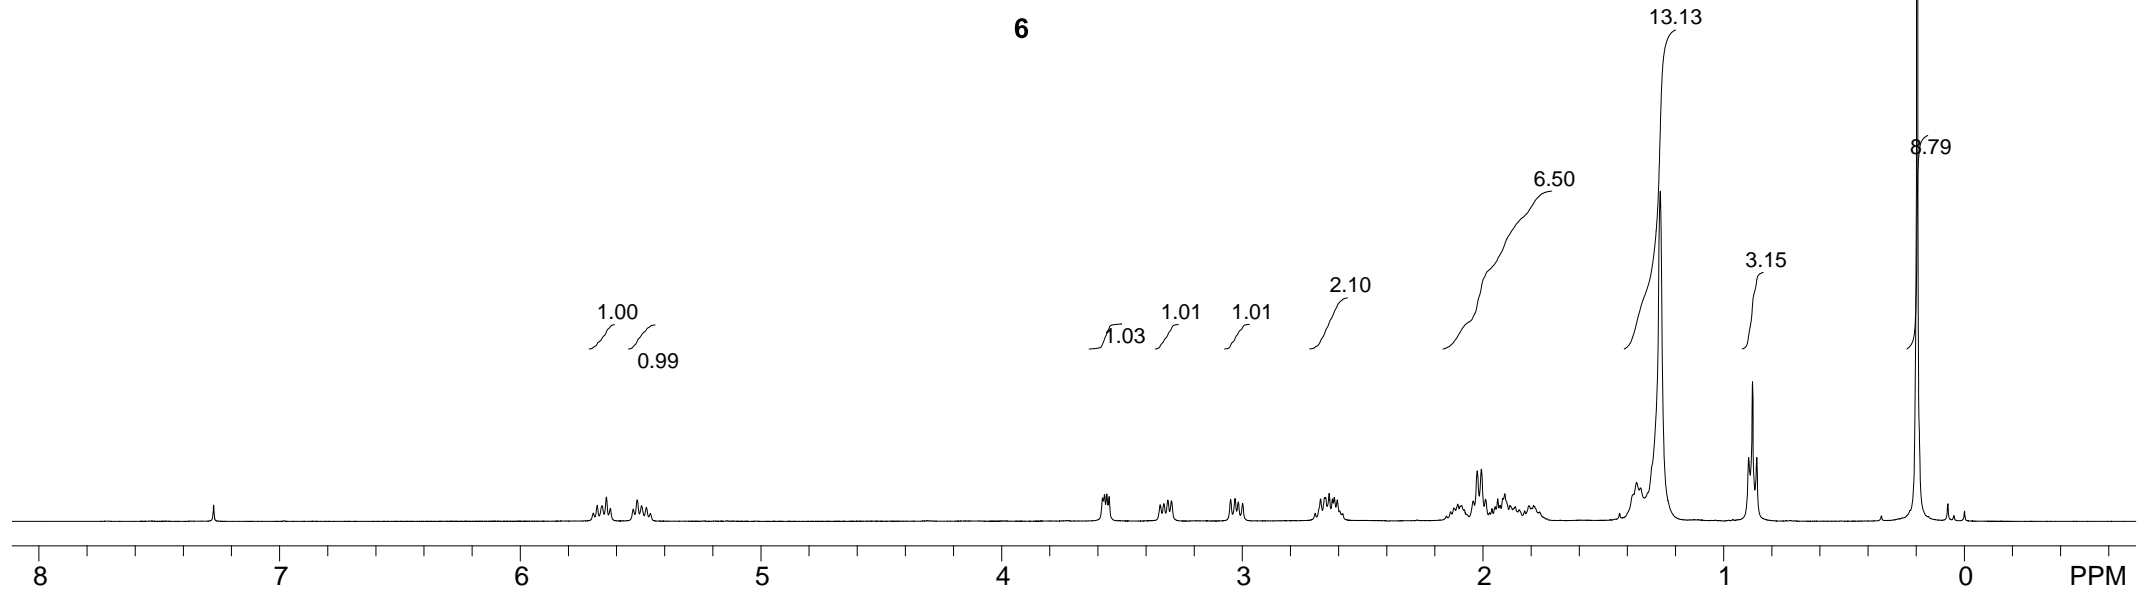

5.697  
5.680  
5.660  
5.642  
5.626  
5.531  
5.515  
5.496  
5.476  
5.459

3.581  
3.572  
3.563  
3.553  
3.341  
3.325  
3.309  
3.294  
3.048  
3.030  
3.017  
3.017  
2.998  
2.697  
2.674  
2.653  
2.639  
2.625  
2.617  
2.605  
2.594  
2.583  
2.135  
2.121  
2.105  
2.095  
2.040  
2.024  
2.006  
1.989  
1.938  
1.909  
1.888  
1.866  
1.807  
1.790  
1.764  
1.377  
1.362  
1.345  
1.264  
0.897  
0.880  
0.863  
0.196  
0.000

cyf-1-120B-C100M-Bruker  
SOLVENT: CDCl3  
NA = 1024  
F1 = 100.605186 MHz  
F2 = 1.000000 MHz

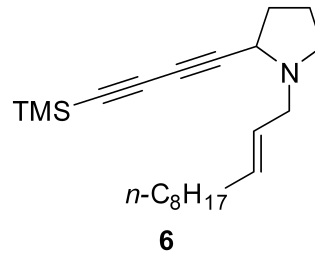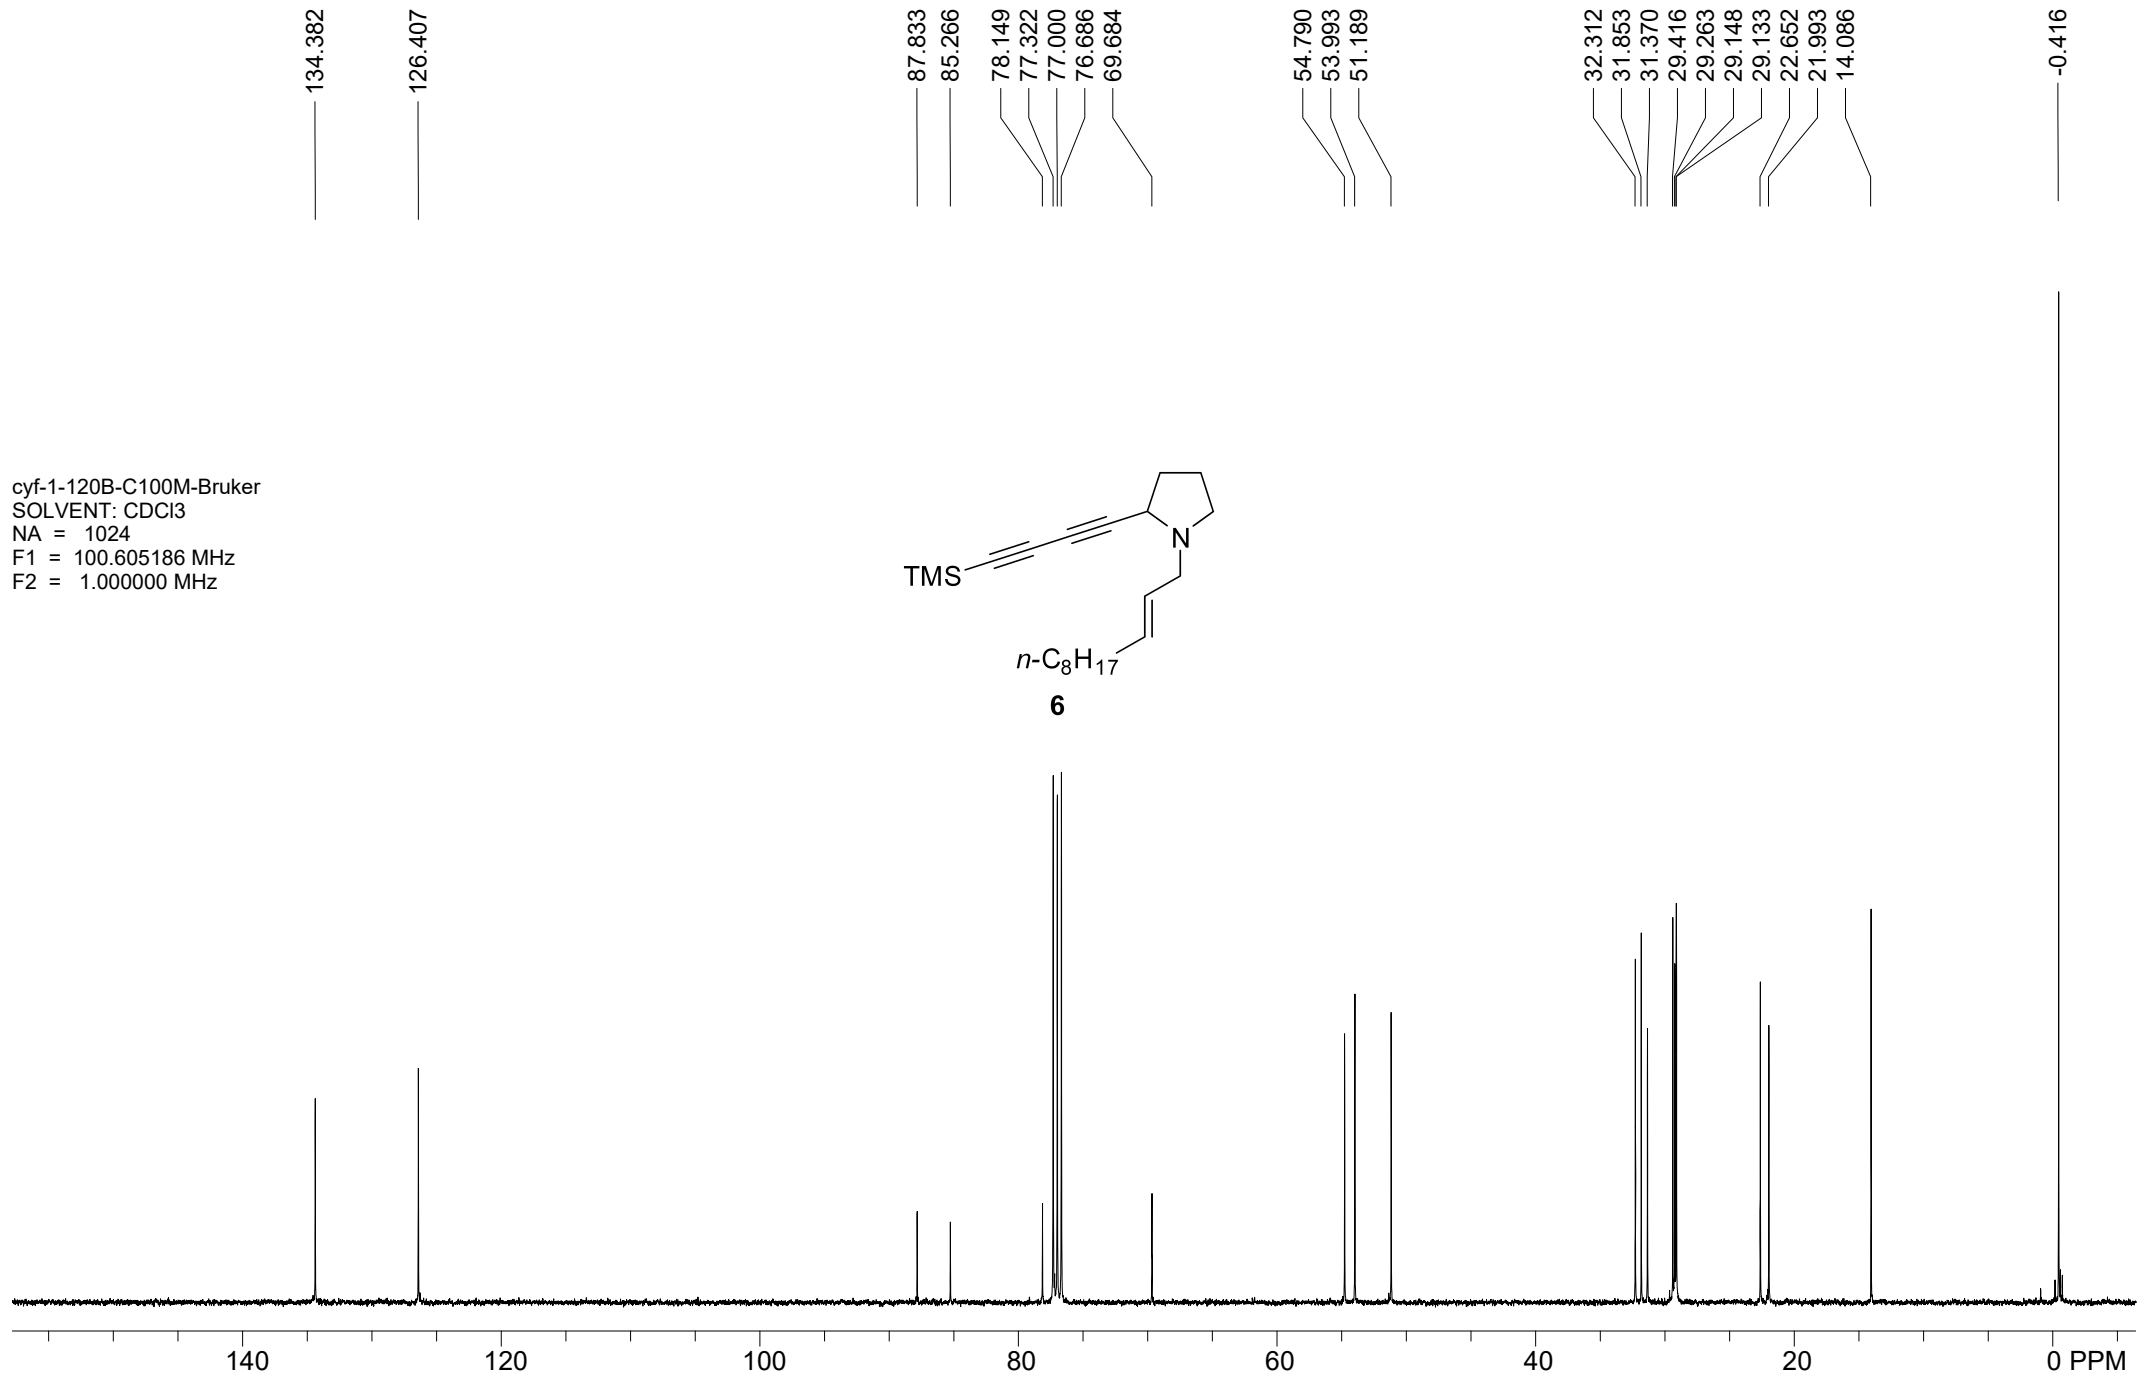

cyf-1-165-H400M  
Mar 19 2018  
SOLVENT: CDCl3  
NA = 20  
F1 = 399.721832 MHz  
F2 = 100.519203 MHz

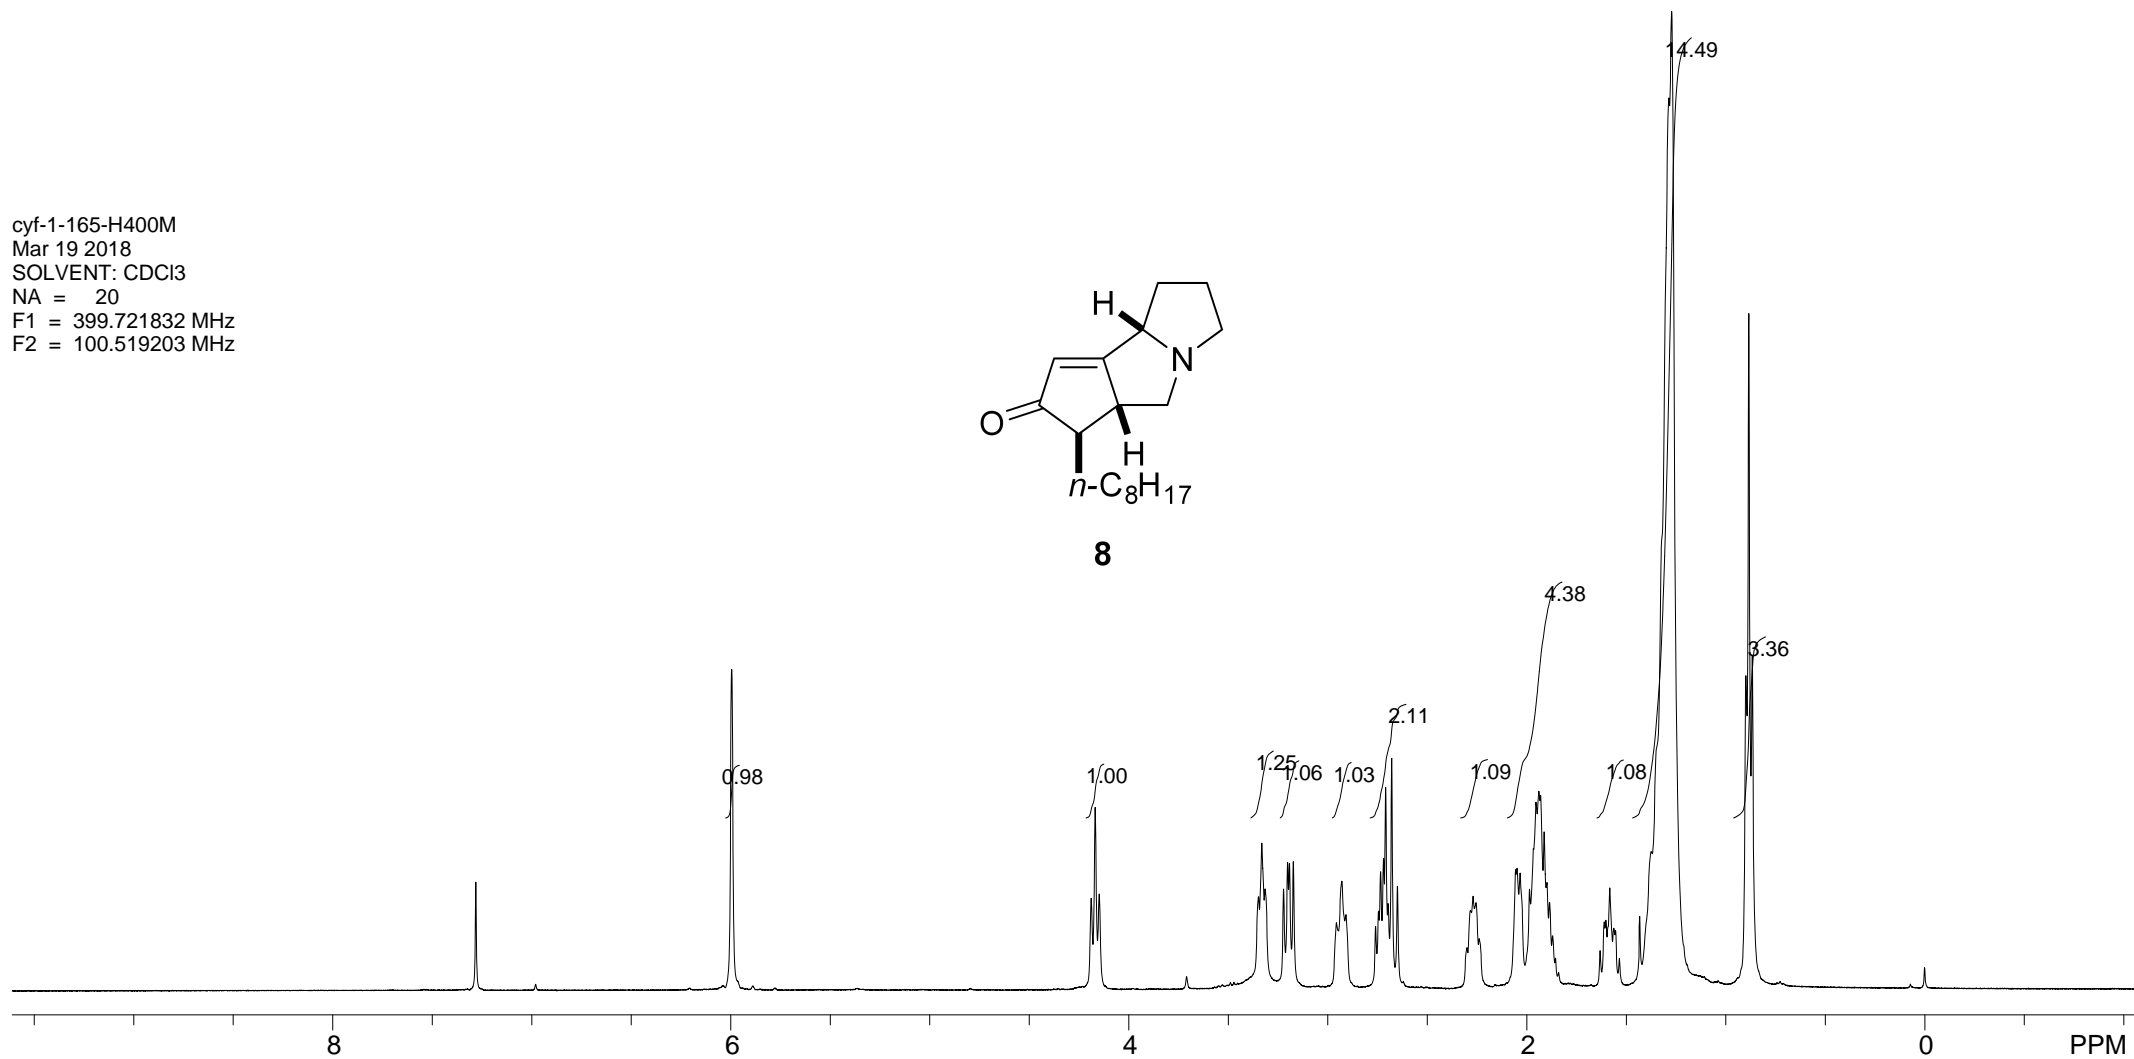

cyf-1-165-C100M-agilent  
Mar 20 2018  
SOLVENT: CDCl3  
NA = 160  
F1 = 100.518944 MHz  
F2 = 399.722015 MHz

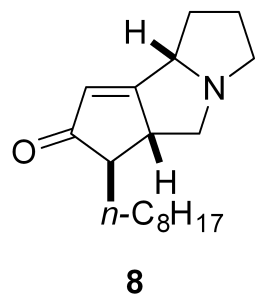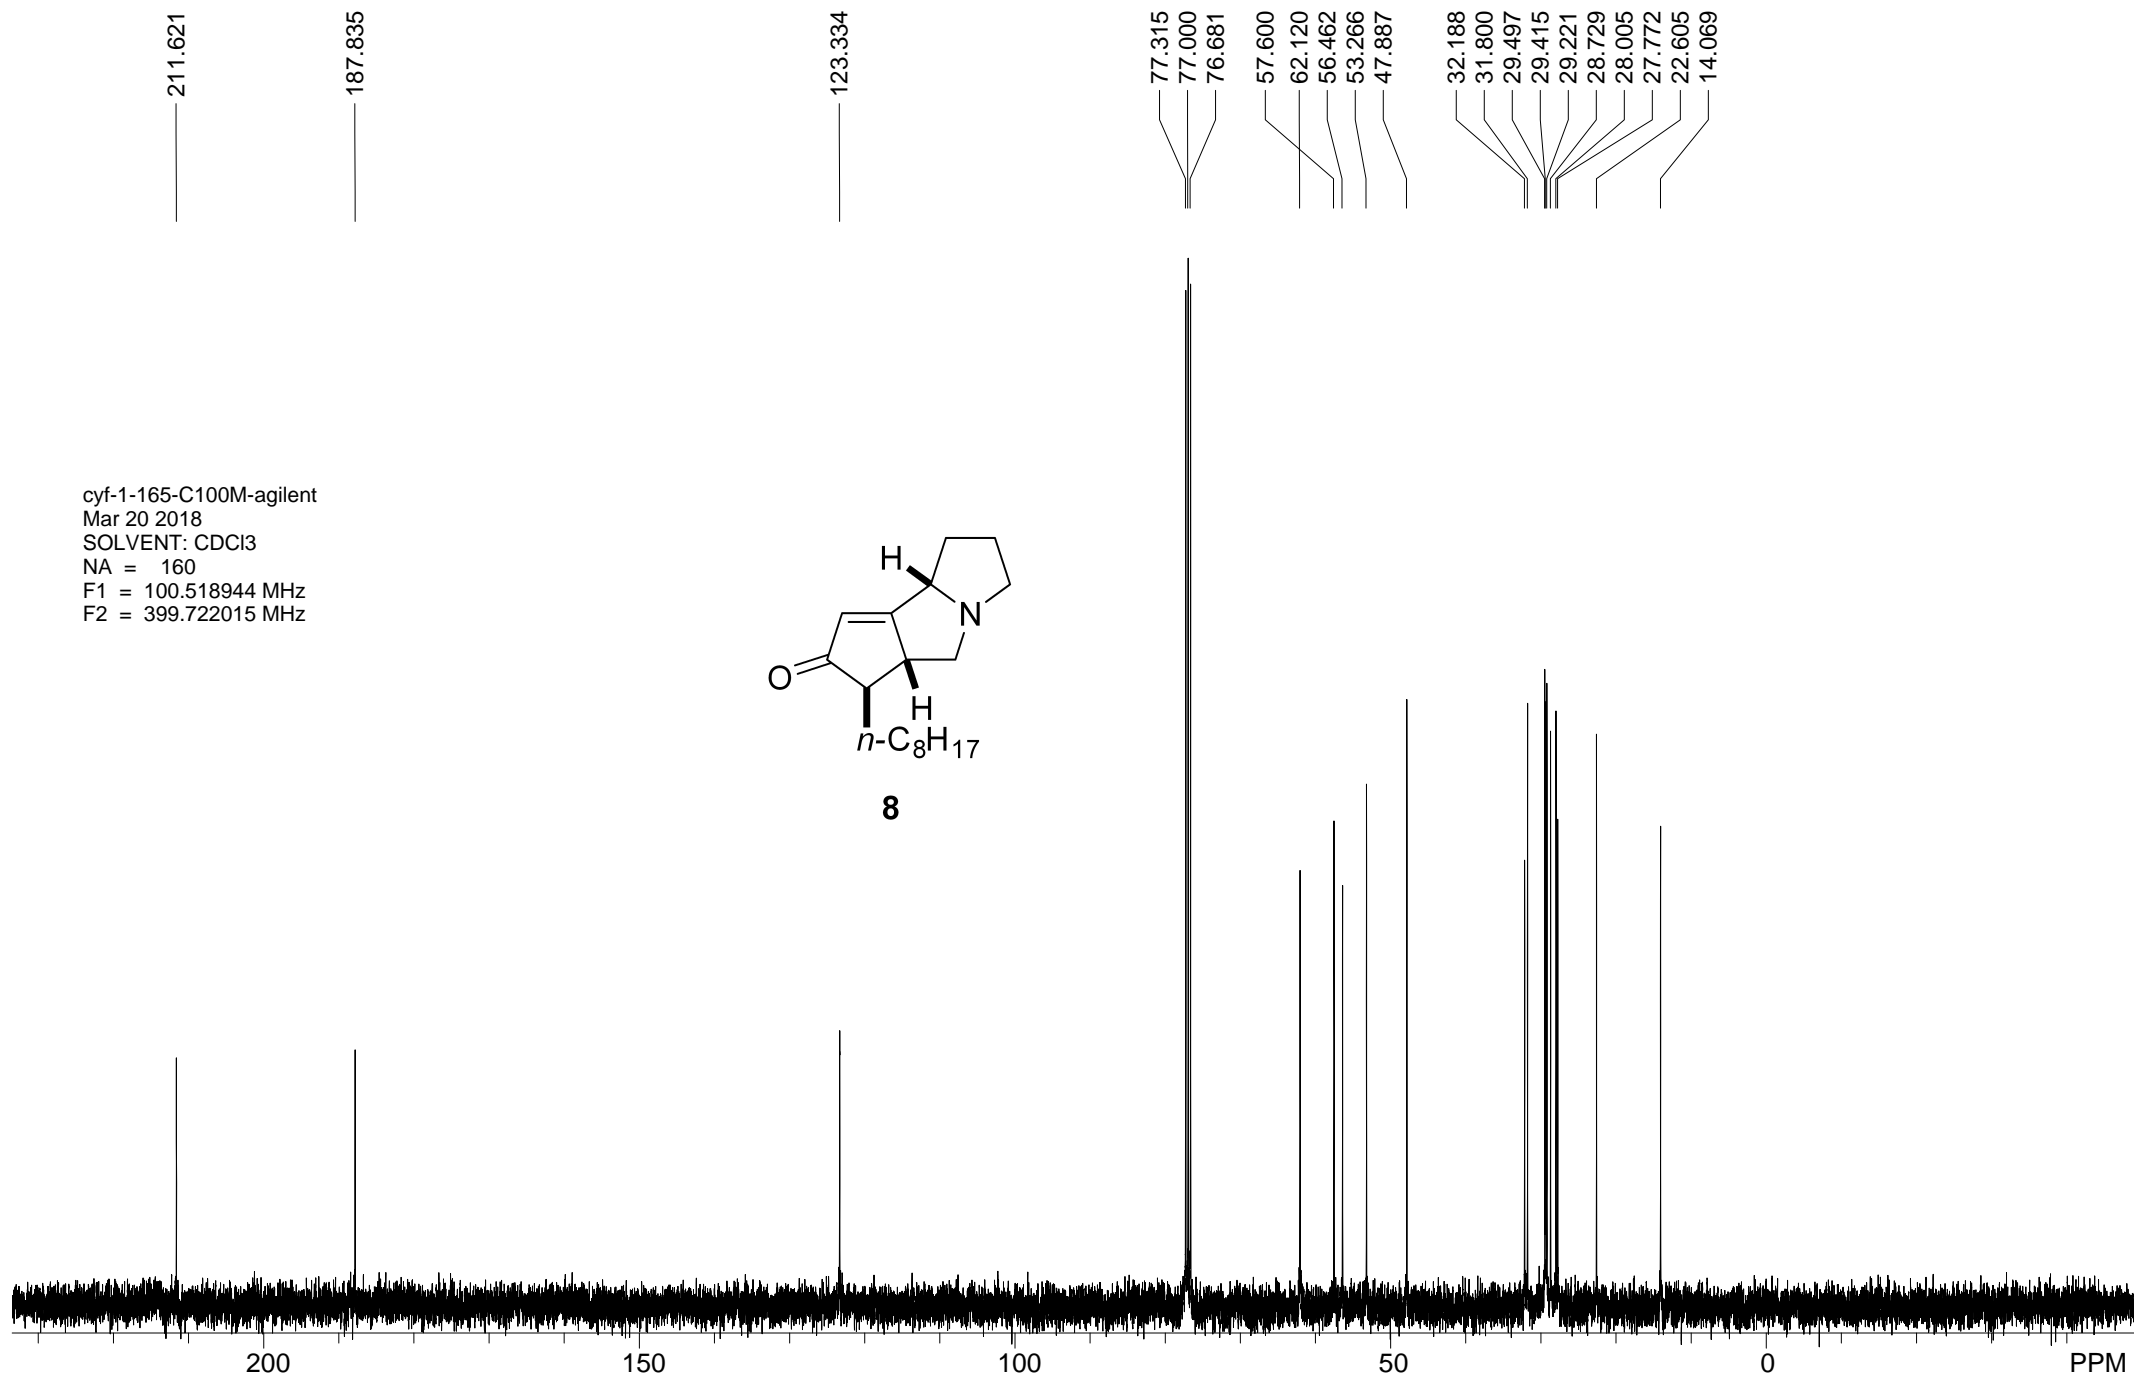

Supplement: SC-010-C8SC04115F-s002.pdf [file SC-010-C8SC04115F-s002.pdf]
